# Supplementary material
Source: PubMed Central journal article supplement (PMC8007132)
Supplement: NIHMS1680741-supplement-Supplementary_Material.pdf [file NIHMS1680741-supplement-Supplementary_Material.pdf]

Design and Development of FGF-23 Antagonists:  
Definition of the pharmacophore and initial  
structure-activity relationships probed by synthetic  
analogues.

*Supporting Information*

| <u>Table of Contents</u>                             | S1–S5 |
|------------------------------------------------------|-------|
| General procedure for Suzuki-Miyaura cross-couplings | S6    |
| Compound <b>6a</b> <sup>1</sup> H NMR                | S26   |
| Compound <b>6b</b> <sup>1</sup> H NMR                | S27   |
| Compound <b>6b</b> <sup>13</sup> C NMR               | S28   |
| Compound <b>6c</b> <sup>1</sup> H NMR                | S29   |
| Compound <b>6c</b> <sup>13</sup> C NMR               | S30   |
| Compound <b>6d</b> <sup>1</sup> H NMR                | S31   |
| Compound <b>6d</b> <sup>13</sup> C NMR               | S32   |
| Compound <b>6e</b> <sup>1</sup> H NMR                | S33   |
| Compound <b>6e</b> <sup>13</sup> C NMR               | S34   |
| Compound <b>6f</b> <sup>1</sup> H NMR                | S35   |
| Compound <b>6f</b> <sup>13</sup> C NMR               | S36   |
| Compound <b>6g</b> <sup>1</sup> H NMR                | S37   |
| Compound <b>6g</b> <sup>13</sup> C NMR               | S38   |
| Compound <b>6h</b> <sup>1</sup> H NMR                | S39   |
| Compound <b>6h</b> <sup>13</sup> C NMR               | S40   |
| Compound <b>6i</b> <sup>1</sup> H NMR                | S41   |
| Compound <b>6i</b> <sup>13</sup> C NMR               | S42   |
| Compound <b>6j</b> <sup>1</sup> H NMR                | S43   |
| Compound <b>6j</b> <sup>13</sup> C NMR               | S44   |
| Compound <b>6k</b> <sup>1</sup> H NMR                | S45   |
| Compound <b>6l</b> <sup>1</sup> H NMR                | S46   |
| Compound <b>6l</b> <sup>13</sup> C NMR               | S47   |

## **Table of Contents, continued**

|                                         |     |
|-----------------------------------------|-----|
| Compound <b>6m</b> <sup>1</sup> H NMR   | S48 |
| Compound <b>6m</b> <sup>13</sup> C NMR  | S49 |
| Compound <b>6n</b> <sup>1</sup> H NMR   | S50 |
| Compound <b>6n</b> <sup>13</sup> C NMR  | S51 |
| Compound <b>6o</b> <sup>1</sup> H NMR   | S52 |
| Compound <b>6o</b> <sup>13</sup> C NMR  | S53 |
| Compound <b>6p</b> <sup>1</sup> H NMR   | S54 |
| Compound <b>6p</b> <sup>13</sup> C NMR  | S55 |
| Compound <b>6q</b> <sup>1</sup> H NMR   | S56 |
| Compound <b>6q</b> <sup>13</sup> C NMR  | S57 |
| Compound <b>6r</b> <sup>1</sup> H NMR   | S58 |
| Compound <b>7a</b> <sup>1</sup> H NMR   | S59 |
| Compound <b>7a</b> <sup>13</sup> C NMR  | S60 |
| Compound <b>7b</b> <sup>1</sup> H NMR   | S61 |
| Compound <b>7b</b> <sup>13</sup> C NMR  | S62 |
| Compound <b>11a</b> <sup>1</sup> H NMR  | S63 |
| Compound <b>11a</b> <sup>13</sup> C NMR | S64 |
| Compound <b>11b</b> <sup>1</sup> H NMR  | S65 |
| Compound <b>11b</b> <sup>13</sup> C NMR | S66 |
| Compound <b>11c</b> <sup>1</sup> H NMR  | S67 |
| Compound <b>11c</b> <sup>13</sup> C NMR | S68 |
| Compound <b>12a</b> <sup>1</sup> H NMR  | S69 |
| Compound <b>12a</b> <sup>13</sup> C NMR | S70 |
| Compound <b>12b</b> <sup>1</sup> H NMR  | S71 |
| Compound <b>12b</b> <sup>13</sup> C NMR | S72 |
| Compound <b>12c</b> <sup>1</sup> H NMR  | S73 |
| Compound <b>12c</b> <sup>13</sup> C NMR | S74 |
| Compound <b>12d</b> <sup>1</sup> H NMR  | S75 |
| Compound <b>12d</b> <sup>13</sup> C NMR | S76 |
| Compound <b>12e</b> <sup>1</sup> H NMR  | S77 |
| Compound <b>12e</b> <sup>13</sup> C NMR | S78 |
| Compound <b>12f</b> <sup>1</sup> H NMR  | S79 |
| Compound <b>12f</b> <sup>13</sup> C NMR | S80 |
| Compound <b>15a</b> <sup>1</sup> H NMR  | S81 |
| Compound <b>15a</b> <sup>13</sup> C NMR | S82 |
| Compound <b>15b</b> <sup>1</sup> H NMR  | S83 |
| Compound <b>15b</b> <sup>13</sup> C NMR | S84 |
| Compound <b>1</b> <sup>1</sup> H NMR    | S85 |
| Compound <b>1</b> <sup>13</sup> C NMR   | S86 |
| Compound <b>8a</b> <sup>1</sup> H NMR   | S87 |
| Compound <b>8a</b> <sup>13</sup> C NMR  | S88 |
| Compound <b>8b</b> <sup>1</sup> H NMR   | S89 |
| Compound <b>8b</b> <sup>13</sup> C NMR  | S90 |
| Compound <b>8c</b> <sup>1</sup> H NMR   | S91 |
| Compound <b>8c</b> <sup>13</sup> C NMR  | S92 |

## **Table of Contents, continued**

|                                         |      |
|-----------------------------------------|------|
| Compound <b>8d</b> <sup>1</sup> H NMR   | S93  |
| Compound <b>8d</b> <sup>13</sup> C NMR  | S94  |
| Compound <b>8e</b> <sup>1</sup> H NMR   | S95  |
| Compound <b>8e</b> <sup>13</sup> C NMR  | S96  |
| Compound <b>8f</b> <sup>1</sup> H NMR   | S97  |
| Compound <b>8f</b> <sup>13</sup> C NMR  | S98  |
| Compound <b>8g</b> <sup>1</sup> H NMR   | S99  |
| Compound <b>8g</b> <sup>13</sup> C NMR  | S100 |
| Compound <b>8h</b> <sup>1</sup> H NMR   | S101 |
| Compound <b>8h</b> <sup>13</sup> C NMR  | S102 |
| Compound <b>8i</b> <sup>1</sup> H NMR   | S103 |
| Compound <b>8i</b> <sup>13</sup> C NMR  | S104 |
| Compound <b>8j</b> <sup>1</sup> H NMR   | S105 |
| Compound <b>8j</b> <sup>13</sup> C NMR  | S106 |
| Compound <b>8k</b> <sup>1</sup> H NMR   | S107 |
| Compound <b>8k</b> <sup>13</sup> C NMR  | S108 |
| Compound <b>8l</b> <sup>1</sup> H NMR   | S109 |
| Compound <b>8l</b> <sup>13</sup> C NMR  | S110 |
| Compound <b>8m</b> <sup>1</sup> H NMR   | S111 |
| Compound <b>8m</b> <sup>13</sup> C NMR  | S112 |
| Compound <b>8n</b> <sup>1</sup> H NMR   | S113 |
| Compound <b>8n</b> <sup>13</sup> C NMR  | S114 |
| Compound <b>8o</b> <sup>1</sup> H NMR   | S115 |
| Compound <b>8o</b> <sup>13</sup> C NMR  | S116 |
| Compound <b>8p</b> <sup>1</sup> H NMR   | S117 |
| Compound <b>8p</b> <sup>13</sup> C NMR  | S118 |
| Compound <b>8q</b> <sup>1</sup> H NMR   | S119 |
| Compound <b>8q</b> <sup>13</sup> C NMR  | S120 |
| Compound <b>8r</b> <sup>1</sup> H NMR   | S121 |
| Compound <b>8r</b> <sup>13</sup> C NMR  | S122 |
| Compound <b>8s</b> <sup>1</sup> H NMR   | S123 |
| Compound <b>8s</b> <sup>13</sup> C NMR  | S124 |
| Compound <b>8t</b> <sup>1</sup> H NMR   | S125 |
| Compound <b>8t</b> <sup>13</sup> C NMR  | S126 |
| Compound <b>8u</b> <sup>1</sup> H NMR   | S127 |
| Compound <b>8u</b> <sup>13</sup> C NMR  | S128 |
| Compound <b>8v</b> <sup>1</sup> H NMR   | S129 |
| Compound <b>8v</b> <sup>13</sup> C NMR  | S130 |
| Compound <b>9a</b> <sup>1</sup> H NMR   | S131 |
| Compound <b>9a</b> <sup>13</sup> C NMR  | S132 |
| Compound <b>9b</b> <sup>1</sup> H NMR   | S133 |
| Compound <b>9b</b> <sup>13</sup> C NMR  | S134 |
| Compound <b>13a</b> <sup>1</sup> H NMR  | S135 |
| Compound <b>13a</b> <sup>13</sup> C NMR | S136 |

## **Table of Contents, continued**

|                                         |      |
|-----------------------------------------|------|
| Compound <b>13b</b> <sup>1</sup> H NMR  | S137 |
| Compound <b>13b</b> <sup>13</sup> C NMR | S138 |
| Compound <b>13c</b> <sup>1</sup> H NMR  | S139 |
| Compound <b>13c</b> <sup>13</sup> C NMR | S140 |
| Compound <b>14a</b> <sup>1</sup> H NMR  | S141 |
| Compound <b>14a</b> <sup>13</sup> C NMR | S142 |
| Compound <b>14b</b> <sup>1</sup> H NMR  | S143 |
| Compound <b>14b</b> <sup>13</sup> C NMR | S144 |
| Compound <b>14c</b> <sup>1</sup> H NMR  | S145 |
| Compound <b>14c</b> <sup>13</sup> C NMR | S146 |
| Compound <b>14d</b> <sup>1</sup> H NMR  | S147 |
| Compound <b>14d</b> <sup>13</sup> C NMR | S148 |
| Compound <b>14e</b> <sup>1</sup> H NMR  | S149 |
| Compound <b>14e</b> <sup>13</sup> C NMR | S150 |
| Compound <b>14f</b> <sup>1</sup> H NMR  | S151 |
| Compound <b>14f</b> <sup>13</sup> C NMR | S152 |
| Compound <b>16a</b> <sup>1</sup> H NMR  | S153 |
| Compound <b>16a</b> <sup>13</sup> C NMR | S154 |
| Compound <b>16b</b> <sup>1</sup> H NMR  | S155 |
| Compound <b>16b</b> <sup>13</sup> C NMR | S156 |
| Chromatogram of <b>1</b>                | S157 |
| Chromatogram of <b>6b</b>               | S158 |
| Chromatogram of <b>6c</b>               | S159 |
| Chromatogram of <b>6d</b>               | S160 |
| Chromatogram of <b>6e</b>               | S161 |
| Chromatogram of <b>6f</b>               | S162 |
| Chromatogram of <b>6i</b>               | S163 |
| Chromatogram of <b>6j</b>               | S164 |
| Chromatogram of <b>6k</b>               | S165 |
| Chromatogram of <b>6l</b>               | S166 |
| Chromatogram of <b>6m</b>               | S167 |
| Chromatogram of <b>6n</b>               | S168 |
| Chromatogram of <b>6o</b>               | S169 |
| Chromatogram of <b>6p</b>               | S170 |
| Chromatogram of <b>7a</b>               | S171 |
| Chromatogram of <b>7b</b>               | S172 |
| Chromatogram of <b>8b</b>               | S173 |
| Chromatogram of <b>8e</b>               | S174 |
| Chromatogram of <b>8f</b>               | S175 |
| Chromatogram of <b>8h</b>               | S176 |
| Chromatogram of <b>8i</b>               | S177 |
| Chromatogram of <b>8j</b>               | S178 |
| Chromatogram of <b>8k</b>               | S179 |
| Chromatogram of <b>8l</b>               | S180 |
| Chromatogram of <b>8m</b>               | S181 |



**Table of Contents, continued**

|                            |             |
|----------------------------|-------------|
| Chromatogram of <b>8n</b>  | <b>S182</b> |
| Chromatogram of <b>8o</b>  | <b>S183</b> |
| Chromatogram of <b>8p</b>  | <b>S184</b> |
| Chromatogram of <b>8q</b>  | <b>S185</b> |
| Chromatogram of <b>8r</b>  | <b>S186</b> |
| Chromatogram of <b>8s</b>  | <b>S187</b> |
| Chromatogram of <b>8u</b>  | <b>S188</b> |
| Chromatogram of <b>8v</b>  | <b>S189</b> |
| Chromatogram of <b>9a</b>  | <b>S190</b> |
| Chromatogram of <b>9b</b>  | <b>S191</b> |
| Chromatogram of <b>13a</b> | <b>S192</b> |
| Chromatogram of <b>13b</b> | <b>S193</b> |
| Chromatogram of <b>13c</b> | <b>S194</b> |
| Chromatogram of <b>14a</b> | <b>S195</b> |
| Chromatogram of <b>14b</b> | <b>S196</b> |
| Chromatogram of <b>14c</b> | <b>S197</b> |
| Chromatogram of <b>14d</b> | <b>S198</b> |
| Chromatogram of <b>14e</b> | <b>S199</b> |
| Chromatogram of <b>14f</b> | <b>S201</b> |
| Chromatogram of <b>16a</b> | <b>S202</b> |
| Chromatogram of <b>16b</b> | <b>S203</b> |

**General Procedure for Suzuki-Miyaura Cross-Coupling of Scaffolds:** To an 8 mL reaction vial equipped with a magnetic stir bar at ambient temperature was charged Pd(OAc)<sub>2</sub>, RuPhos, Cs<sub>2</sub>CO<sub>3</sub> (3 equiv), the requisite substrate (0.857 mmol), and the desired organoboron reagent (equivalents listed for each reaction). The mixture was slurried in Tol:H<sub>2</sub>O (4:1) (0.2 M) and heated to 100 °C for 16 hours upon which time the crude mixture was analyzed by <sup>1</sup>H NMR to ascertain percent conversion of the starting material. Concentration of the crude reaction mixtures under reduced pressure at ambient temperature followed by purification on normal phase silica gel using automated flash-column chromatography with MTBE:hexanes, or EtOAc:hexanes gradient mobile phases afforded the compounds described in the listed yields.

Compounds **6a**, **6k**, and **6r** are known compounds in the primary literature.<sup>1</sup>

**Table S1.** Aliphatic core aldehyde synthons for analogue preparation.

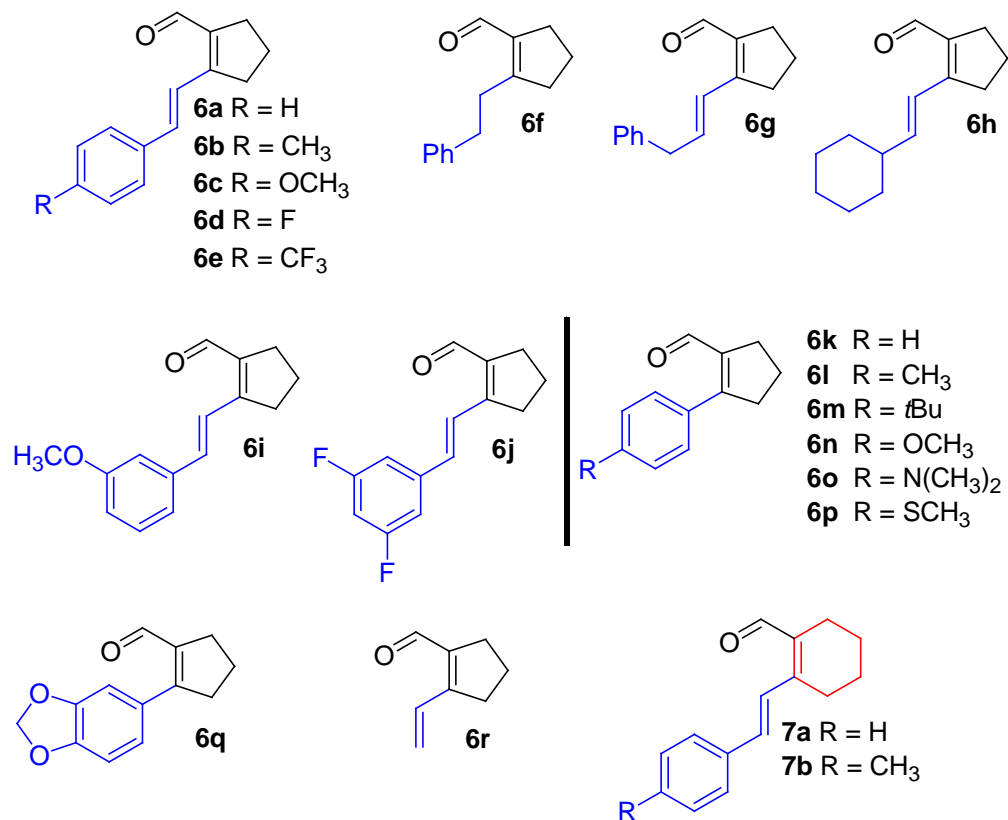

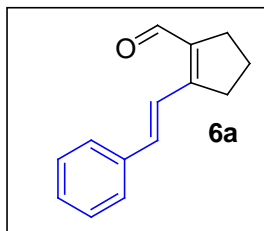

**2-Styryl-cyclopent-1-enecarbaldehyde (6a)-precursor to 1:** Prepared according to the general procedure discussed above with **4** (1.71 mmol): 5.0 mol % Pd(OAc)<sub>2</sub>, 10.0 mol % Ruphos, and 1.20 equiv potassium styryltrifluoroborate, R<sub>F</sub> = 0.62, 20% MTBE:hexanes; purified using

automated flash column chromatography employing an MTBE:hexanes gradient mobile phase with a 5% isocratic hold; isolated yield 0.235 g, 70%; orange solid; mp = 97.5–99.0 °C; <sup>1</sup>H NMR (500 MHz, CDCl<sub>3</sub>): δ 10.33 (s, 1H), 7.68 (d, *J* = 16.0 Hz, 1H), 7.51 (d, *J* = 7.5 Hz, 2H), 7.38 (t, *J* = 7.5 Hz, 2H), 7.35–7.30 (m, 1H), 6.87 (d, *J* = 16.0 Hz, 1H), 2.91 (t, *J* = 7.5 Hz, 2H), 2.72 (t, *J* = 7.5 Hz, 2H), 1.96 (pent, *J* = 7.5 Hz, 2H). Experimental data above was commensurate with results published previously.<sup>2</sup>

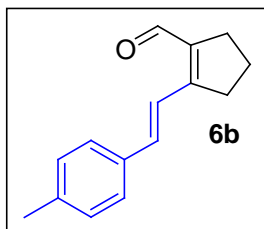

**2-(2-*p*-Tolyl-vinyl)-cyclopent-1-enecarbaldehyde (6b)-precursor to 8a:** Prepared according to the general procedure discussed above with **4** (0.571 mmol): 5.0 mol % Pd(OAc)<sub>2</sub>, 10.0 mol % Ruphos, and 1.05 equiv 4-methylstyrenylboronic acid, R<sub>F</sub> = 0.58, 20% MTBE:hexanes; purified using

automated flash column chromatography employing an MTBE:hexanes gradient mobile phase with a 5% isocratic hold; isolated yield 0.050 g, 42%; orange solid; mp = 104.2–107.3 °C; <sup>1</sup>H NMR (500 MHz, CDCl<sub>3</sub>): δ 10.33 (s, 1H), 7.64 (d, *J* = 15.9 Hz, 1H), 7.41 (d, *J* = 8.0 Hz, 2H), 7.19 (d, *J* = 8.0 Hz, 2H), 6.84 (d, *J* = 15.9 Hz, 1H), 2.90 (br-t, *J* = 7.7 Hz, 2H), 2.71 (br-t, *J* = 7.7 Hz, 2H), 2.37 (s, 3H), 1.95 (pent, *J* = 7.7 Hz, 2H); <sup>13</sup>C NMR (125 MHz, CDCl<sub>3</sub>): δ 187.6, 158.2, 139.5, 136.8, 133.6, 129.8, 127.3, 119.2, 34.9, 31.2, 21.53, 21.48; IR (ATR-CDCl<sub>3</sub>):  $\bar{\nu}_{max}$  = 3035, 2952, 2850, 1653, 1616, 1580, 804 cm<sup>-1</sup>; HRMS (EI): *m/z* calculated for C<sub>15</sub>H<sub>16</sub>O: 212.1201; found: 212.1208.

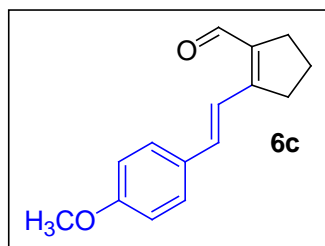

**2-[2-(4-Methoxy-phenyl)-vinyl]-cyclopent-1-enecarbaldehyde**

**(6c)-precursor to 8b:** Prepared according to the general procedure discussed above with **4** (0.571 mmol): 5.0 mol % Pd(OAc)<sub>2</sub>, 10.0 mol % Ruphos, and 1.05 equiv 4-methoxystyrenylboronic acid, R<sub>F</sub> = 0.35,

20% MTBE:hexanes; purified using automated flash column chromatography employing an MTBE:hexanes gradient mobile phase with a 5% isocratic hold; isolated yield 0.090 g, 69%; orange solid; mp = 107.0–110.0 °C; <sup>1</sup>H NMR (500 MHz, CDCl<sub>3</sub>): δ 10.32 (s, 1H), 7.56 (d, *J* = 15.7 Hz, 1H), 7.48–7.44 (m, 2H), 6.93–6.89 (m, 2H), 6.83 (d, *J* = 15.7 Hz, 1H), 3.84 (s, 3H), 2.89 (br-t, *J* = 7.5 Hz, 2H), 2.71 (br-t, *J* = 7.5 Hz, 2H), 1.95 (pent, *J* = 7.5 Hz, 2H); <sup>13</sup>C NMR (125 MHz, CDCl<sub>3</sub>): δ 187.6, 160.6, 158.4, 138.9, 138.5, 129.2, 128.8, 118.0, 114.5, 55.5, 34.9, 31.2, 21.5; IR (ATR-CDCl<sub>3</sub>):  $\bar{\nu}_{max}$  = 3035, 2918, 2833, 1643, 1604, 1580, 1512, 859 cm<sup>-1</sup>; HRMS (EI): *m/z* calculated for C<sub>15</sub>H<sub>16</sub>O<sub>2</sub>: 228.1150; found: 228.1144.

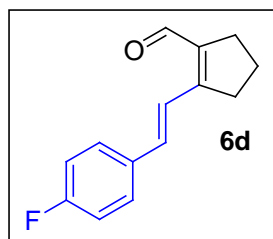

**2-[2-(4-Fluoro-phenyl)-vinyl]-cyclopent-1-enecarbaldehyde (6d)-**

**precursor to 8c:** Prepared according to the general procedure discussed above with **4** (0.571 mmol): 5.0 mol % Pd(OAc)<sub>2</sub>, 10.0 mol % RuPhos, and 1.05 equiv 4-fluorostyrenylboronic acid, R<sub>F</sub> = 0.48, 20%

MTBE:hexanes; purified using automated flash column chromatography employing an MTBE:hexanes gradient mobile phase with a 5% isocratic hold; isolated yield 0.050 g, 41%; brown oil; <sup>1</sup>H NMR (500 MHz, CDCl<sub>3</sub>): δ 10.31 (s, 1H), 7.59 (d, *J* = 16.0 Hz, 1H), 7.50–7.46 (m, 2H), 7.11–7.04 (m, 2H), 6.82 (d, *J* = 16.0 Hz, 1H), 2.89 (br-t, *J* = 7.5 Hz, 2H), 2.71 (br-t, *J* = 7.5 Hz, 2H), 1.96 (pent, *J* = 7.5 Hz, 2H); <sup>13</sup>C NMR (125 MHz, CDCl<sub>3</sub>): δ 187.5, 164.2, 162.4, 157.6, 139.9, 135.5, 132.6 (d, *J* = 3.6 Hz), 129.0 (d, *J* = 8.2 Hz), 120.0 (d, *J* = 2.5 Hz), 116.1 (d, *J* = 22.0

Hz), 34.9, 31.4, 21.5; IR (ATR-CDCl<sub>3</sub>):  $\bar{\nu}_{max}$  = 3044, 2955, 2849, 1652, 1618, 1600, 1592, 1575, 1233, 1217 cm<sup>-1</sup>; HRMS (EI):  $m/z$  calculated for C<sub>14</sub>H<sub>13</sub>FO: 216.0950; found: 216.0950.

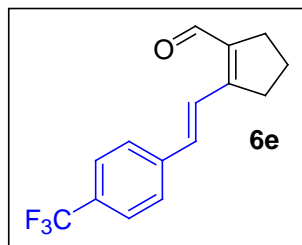

**2-[2-(4-Trifluoromethyl-phenyl)-vinyl]-cyclopent-1-**

**enecarbaldehyde (6e)-precursor to 8d:** Prepared according to the

general procedure discussed above with **4** (0.857 mmol): 5.0 mol %

Pd(OAc)<sub>2</sub>, 10.0 mol % RuPhos, and 1.20 equiv 4-

trifluoromethylstyrenylboronic acid, R<sub>F</sub> = 0.48, 20% MTBE:hexanes; purified using automated

flash column chromatography with an MTBE:hexanes gradient mobile phase with a 5% isocratic

hold; isolated yield 0.205 g, 90%; pale-orange solid; mp = 98.9–101.7 °C; <sup>1</sup>H NMR (500 MHz,

CDCl<sub>3</sub>): δ 10.34 (s, 1H), 7.75 (d, *J* = 16.0 Hz, 1H), 7.63 (d, *J* = 8.5 Hz, 2H), 7.60 (d, *J* = 8.5 Hz,

2H), 6.86 (d, *J* = 16.0 Hz, 1H), 2.91 (t, *J* = 7.5 Hz, 2H), 2.74 (t, *J* = 7.5 Hz, 2H), 1.98 (pent, *J* =

7.5 Hz, 2H); <sup>13</sup>C NMR (125 MHz, CDCl<sub>3</sub>): δ 187.4, 156.6, 141.0, 139.7, 134.8, 130.5, 127.29,

127.2X (overlaps with 127.29), 125.8, 123.4, 34.7, 31.3, 21.3; IR (ATR-CDCl<sub>3</sub>):  $\bar{\nu}_{max}$  = 3051,

3854, 2926, 1639, 1617, 1589, 1322, 1167, 1120, 1066 cm<sup>-1</sup>; HRMS (EI):  $m/z$  calculated for

C<sub>15</sub>H<sub>13</sub>F<sub>3</sub>O: 266.0918; found: 266.0908.

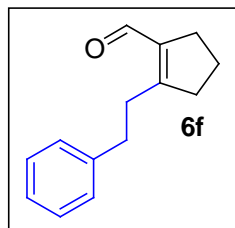

**2-Phenethyl-cyclopent-1-enecarbaldehyde (6f)-precursor to 8f:** Prepared

according to the general procedure discussed above with **4** (0.571 mmol): 5.0

mol % Pd(OAc)<sub>2</sub>, 10.0 mol % RuPhos, and 1.05 equiv potassium

phenethyltrifluoroborate, R<sub>F</sub> = 0.71, 20% MTBE:hexanes; purified using

automated flash column chromatography employing an MTBE:hexanes gradient mobile phase

with a 5% isocratic hold; isolated yield 0.075 g, 66%; orange liquid; <sup>1</sup>H NMR (500 MHz, CDCl<sub>3</sub>):

$\delta$  9.77 (s, 1H), 7.31–7.26 (m, 2H), 7.23–7.18 (m, 1H), 7.17–7.12 (m, 2H), 2.92–2.86 (m, 2H), 2.85–2.80 (m, 2H), 2.61 (br-t,  $J = 7.6$  Hz, 2H), 2.52 (br-t,  $J = 7.6$  Hz, 2H), 1.85 (pent,  $J = 7.6$  Hz, 2H);  $^{13}\text{C}$  NMR (125 MHz,  $\text{CDCl}_3$ ):  $\delta$  188.0, 164.9, 140.6, 139.1, 128.7, 128.4, 126.6, 38.6, 34.8, 30.6, 30.3, 21.6; IR (ATR- $\text{CDCl}_3$ ):  $\bar{\nu}_{\text{max}} = 3027, 2951, 2855, 1661, 1627, 750, 700 \text{ cm}^{-1}$ ; HRMS (EI):  $m/z$  calculated for  $\text{C}_{14}\text{H}_{16}\text{O}$  [M-H]: 199.1117; found: 199.1127.

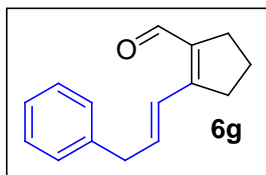

**2-(3-Phenylpropenyl)-cyclopent-1-enecarbaldehyde (6g)-precursor to**

**8g:** Prepared according to the general procedure discussed above with **4** (0.571 mmol): 5.0 mol %  $\text{Pd}(\text{OAc})_2$ , 10.0 mol % RuPhos, and 1.05 equiv

3-phenylpropenylboronic acid,  $R_F = 0.57$ , 20% MTBE:hexanes; purified using automated flash column chromatography employing an MTBE:hexanes gradient mobile phase with a 5% isocratic hold; isolated yield 0.0952 g, 79%; yellow oil;  $^1\text{H}$  NMR (500 MHz,  $\text{CDCl}_3$ ):  $\delta$  10.17 (s, 1H), 7.33 (t,  $J = 7.5$  Hz, 2H), 7.25–7.22 (m, 1H), 7.20 (d,  $J = 7.5$  Hz, 2H), 7.02 (d,  $J = 15.5$  Hz, 1H), 6.21 (dt,  $J = 15.5, 7.0$  Hz, 1H), 3.57 (d,  $J = 7.0$  Hz, 2H), 2.75 (t,  $J = 7.5$  Hz, 2H), 2.64 (t,  $J = 7.5$  Hz, 2H), 1.88 (pent,  $J = 7.5$  Hz, 2H);  $^{13}\text{C}$  NMR (125 MHz,  $\text{CDCl}_3$ ):  $\delta$  187.8, 158.1, 139.1, 138.7, 138.6, 128.81, 128.80, 126.7, 123.4, 39.8, 35.0, 30.9, 21.4; IR (ATR- $\text{CDCl}_3$ ):  $\bar{\nu}_{\text{max}} = 3028, 2953, 2857, 1656, 1633, 751, 699 \text{ cm}^{-1}$ ; HRMS (EI):  $m/z$  calculated for  $\text{C}_{15}\text{H}_{16}\text{O}$ : 212.1201; found: 212.1191.

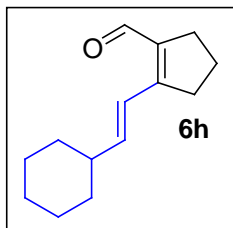

**2-(2-Cyclohexylvinyl)-cyclopent-1-enecarbaldehyde (6h)-precursor to**

**8i:** Prepared according to the general procedure discussed above with **4** (0.571 mmol): 5.0 mol %  $\text{Pd}(\text{OAc})_2$ , 10.0 mol % RuPhos, and 1.05 equiv cyclohexylvinyl boronic acid,  $R_F = 0.70$ , 20% MTBE:hexanes; purified using

automated flash column chromatography employing an MTBE:hexanes gradient mobile phase with a 2.5% isocratic hold; isolated yield 0.068 g, 58%; orange solid; mp = 46.0–49.6 °C; <sup>1</sup>H NMR (500 MHz, CDCl<sub>3</sub>): δ 10.19 (s, 1H), 6.94 (d, *J* = 16.0 Hz, 1H), 6.02 (dd, *J* = 16.0, 7.5 Hz, 1H), 2.75 (t, *J* = 7.5 Hz, 2H), 2.64 (br-t, *J* = 7.5 Hz, 2H), 2.20–2.12 (m, 1H), 1.88 (pent, *J* = 7.5 Hz, 2H), 1.81–1.73 (br-m, 4H), 1.73–1.66 (br-m, 2H), 1.37–1.11 (br-m, 4H); <sup>13</sup>C NMR (125 MHz, CDCl<sub>3</sub>): δ 187.9, 159.1, 146.3, 137.9, 120.0, 41.8, 35.1, 32.7, 30.9, 26.1, 26.0, 21.4; IR (ATR-CDCl<sub>3</sub>):  $\bar{\nu}_{max}$  = 2924, 2851, 1658, 1630 cm<sup>-1</sup>; HRMS (EI): *m/z* calculated for C<sub>14</sub>H<sub>20</sub>O: 204.1514; found: 204.1505.

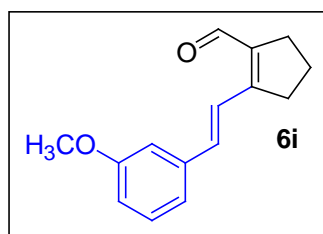

**2-[2-(3-Methoxy-phenyl)-vinyl]-cyclopent-1-enecarbaldehyde (6i)-**

**precursor to 8j:** Prepared according to the general procedure discussed above with **4** (0.571): 5.0 mol % Pd(OAc)<sub>2</sub>, 10.0 mol % RuPhos, and 1.05 equiv 3-methoxystyrenyl boronic acid pinacol ester,

*R<sub>F</sub>* = 0.39, 20% MTBE:hexanes; purified using automated flash column chromatography with an MTBE:hexanes gradient mobile phase with a 2.5% isocratic hold; isolated yield 0.044 g, 34%; orange solid; mp = 84.2–88.0 °C; <sup>1</sup>H NMR (500 MHz, CDCl<sub>3</sub>): δ 10.34 (s, 1H), 7.66 (d, *J* = 15.8 Hz, 1H), 7.31 (t, *J* = 8.0 Hz, 1H), 7.11 (br-d, *J* = 7.5 Hz, 1H), 7.04–7.02 (br-m, 1H), 6.89 (dd, *J* = 8.0, 2.5 Hz, 1H), 6.84 (d, *J* = 15.9 Hz, 1H), 3.87 (s, 3H), 2.91 (t, *J* = 7.5 Hz, 2H), 2.72 (t, *J* = 7.5 Hz, 2H), 1.97 (pent, *J* = 7.5 Hz, 2H); <sup>13</sup>C NMR (125 MHz, CDCl<sub>3</sub>): δ 187.6, 160.1, 157.7, 140.0, 137.8, 136.7, 130.0, 120.4, 120.0, 114.8, 112.6, 55.5, 34.9, 31.3, 21.4; IR (ATR-CDCl<sub>3</sub>):  $\bar{\nu}_{max}$  = 2955, 2837, 1651, 1615, 1596, 1584, 779 cm<sup>-1</sup>; HRMS (EI): *m/z* calculated for C<sub>15</sub>H<sub>16</sub>O<sub>2</sub>: 228.1150; found: 228.1140.

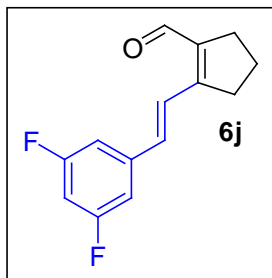

**2-[2-(3,5-Difluoro-phenyl)-vinyl]-cyclopent-1-enecarbaldehyde (6j)-**

**precursor to 8k:** Prepared according to the general procedure discussed above with **4** (0.571 mmol): 5.0 mol % Pd(OAc)<sub>2</sub>, 10.0 mol % RuPhos, and 1.05 equiv 3,5-difluorostyrenyl boronic acid pinacol ester, R<sub>F</sub> = 0.58,

20% MTBE:hexanes; purified using automated flash column chromatography using an MTBE:hexanes gradient mobile phase employing a 2.5% isocratic hold; yellow solid; isolated yield 0.081 g, 61%; yellow solid; mp = 106.3–108.5 °C; <sup>1</sup>H NMR (500 MHz, CD<sub>3</sub>OD): δ 10.33 (s, 1H), 7.91 (d, *J* = 16.0 Hz, 1H), 7.29–7.23 (m, 2H), 6.94 (d, *J* = 16.0 Hz, 1H), 6.92–6.87 (m, 1H), 2.94 (t, *J* = 7.5 Hz, 2H), 2.67 (t, *J* = 7.5 Hz, 2H), 1.97 (pent, *J* = 7.5 Hz, 2H); <sup>13</sup>C NMR (125 MHz, CDCl<sub>3</sub>): δ 187.5, 163.5 (dd, *J* = 250, 13 Hz), 156.3, 141.4, 139.8 (t, *J* = 10.9 Hz), 134.2 (t, *J* = 3.0 Hz), 122.6 (t, *J* = 3.1 Hz), 109.9 (dd, *J* = 19.5, 6.5 Hz), 104.2 (t, *J* = 25.5 Hz), 34.8, 31.5, 21.4; IR (ATR-CDCl<sub>3</sub>):  $\bar{\nu}_{max}$  = 3092, 2959, 2854, 1646, 1623, 1593, 905, 726 cm<sup>-1</sup>; HRMS (EI): *m/z* calculated for C<sub>14</sub>H<sub>12</sub>F<sub>2</sub>O: 234.0856; found: 234.0861.

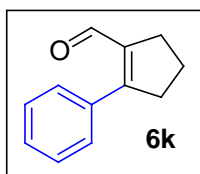

**2-Phenyl-cyclopent-1-enecarbaldehyde (6k)-precursor to 8l:**

Prepared according to the general procedure discussed above with **4** (0.571 mmol): 5.0 mol % Pd(OAc)<sub>2</sub>, 10.0 mol % RuPhos, and 1.05 equiv phenylboronic acid;

purified using automated flash column chromatography using an MTBE:hexanes gradient mobile phase employing a 2.5% isocratic hold; isolated yield 0.146 g, 95%; <sup>1</sup>H NMR (500 MHz, CDCl<sub>3</sub>): δ 9.82 (s, 1H), 7.41–7.38 (m, 3H), 7.36–7.33 (m, 2H), 3.01–2.96 (m, 2H), 2.78–2.73 (m, 2H), 2.01 (pent, *J* = 7.5 Hz, 2H).



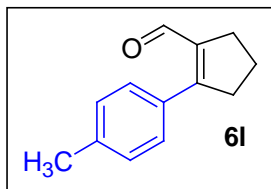

**2-*p*-Tolyl-cyclopent-1-enecarbaldehyde (6l)-precursor to 8m:** Prepared according to the general procedure discussed above with **4** (0.857 mmol):

5.0 mol % Pd(OAc)<sub>2</sub>, 10.0 mol % RuPhos, and 1.20 equiv potassium 4-methylphenyltrifluoroborate,  $R_F = 0.68$ , 20% MTBE:hexanes; purified using automated flash column chromatography using an MTBE:hexanes gradient mobile phase employing a 2.5% isocratic hold; isolated yield 0.106 g, 66%; orange oil; <sup>1</sup>H NMR (500 MHz, CDCl<sub>3</sub>): δ 9.85 (s, 1H), 7.28–7.26 (br-m, 2H), 7.24–7.20 (br-m, 2H), 3.01–2.96 (m, 2H), 2.78–2.72 (m, 2H), 2.39 (s, 3H), 2.01 (pent,  $J = 7.5$  Hz, 2H); <sup>13</sup>C NMR (125 MHz, CDCl<sub>3</sub>): δ 190.7, 162.7, 139.6, 139.2, 132.2, 129.3, 128.7, 39.7, 31.2, 21.8, 21.4; IR (ATR-CDCl<sub>3</sub>):  $\bar{\nu}_{max} = 3028, 2954, 2852, 1658, 1607, 817$  cm<sup>-1</sup>; HRMS (EI):  $m/z$  calculated for C<sub>13</sub>H<sub>14</sub>O: 186.1045; found: 186.1045.

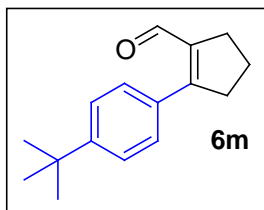

**2-(4-*tert*-Butyl-phenyl)-cyclopent-1-enecarbaldehyde (6m)-precursor to 8n:** Prepared according to the general procedure discussed above with **4** (0.857 mmol):

5.0 mol % Pd(OAc)<sub>2</sub>, 10.0 mol % RuPhos, and 1.20 equiv potassium 4-*tert*-butylphenyl trifluoroborate,  $R_F = 0.70$ , 20% MTBE:hexanes; purified using automated flash column chromatography using an MTBE:hexanes gradient mobile phase employing a 2.5% isocratic hold; isolated yield 0.142 g, 73%; yellow oil; <sup>1</sup>H NMR (500 MHz, CDCl<sub>3</sub>): δ 9.86 (s, 1H), 7.45–7.41 (m, 2H), 7.34–7.29 (m, 2H), 3.02–2.97 (m, 2H), 2.79–2.73 (m, 2H), 2.01 (pent,  $J = 7.5$  Hz, 2H), 1.36 (s, 9H); <sup>13</sup>C NMR (125 MHz, CDCl<sub>3</sub>): δ 190.7, 162.6, 152.8, 139.3, 132.2, 128.6, 125.6, 39.7, 34.9, 31.4, 31.3, 21.8; IR (ATR-CDCl<sub>3</sub>):  $\bar{\nu}_{max} = 3034, 2960, 2905, 2868, 1659, 1607, 1508, 1233, 833$  cm<sup>-1</sup>; HRMS (EI):  $m/z$  calculated for C<sub>16</sub>H<sub>20</sub>O: 228.1514; found: 228.1514.

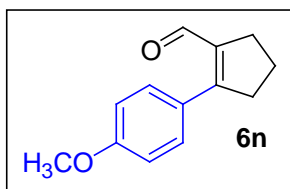

**2-(4-Methoxy-phenyl)-cyclopent-1-enecarbaldehyde (6n)-precursor**

**to 8o:** Prepared according to the general procedure discussed above with

**4** (0.857): 5.0 mol % Pd(OAc)<sub>2</sub>, 10.0 mol % RuPhos, and 1.20 equiv of potassium 4-methoxyphenyltrifluoroborate, R<sub>F</sub> = 0.54, 20% MTBE:hexanes; purified using automated flash column chromatography using an MTBE:hexanes gradient mobile phase employing a 2.5% isocratic hold; isolated yield 0.153 g, 88%; yellow film; <sup>1</sup>H NMR (500 MHz, CDCl<sub>3</sub>): δ 9.85 (s, 1H), 7.40–7.30 (m, 2H), 6.95–6.91 (m, 2H), 3.84 (s, 3H), 2.99–2.93 (m, 2H), 1.99 (pent, *J* = 7.5 Hz, 2H); <sup>13</sup>C NMR (125 MHz, CDCl<sub>3</sub>): δ 190.6, 162.4, 160.7, 138.6, 130.3, 122.5, 114.1, 55.5, 39.6, 31.3, 21.7; IR (ATR-CDCl<sub>3</sub>):  $\bar{\nu}_{max}$  = 2954, 2837, 1653, 1603, 1509, 1252, 1177, 832 cm<sup>-1</sup>; HRMS (EI): *m/z* calculated for C<sub>13</sub>H<sub>14</sub>O<sub>2</sub>: 202.0994; found: 202.0996.

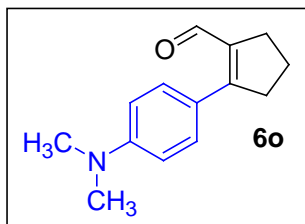

**2-(4-Dimethylamino-phenyl)-cyclopent-1-enecarbaldehyde (6o)-**

**precursor to 8p:** Prepared according to the general procedure discussed

above with **4** (0.857 mmol): 5.0 mol % Pd(OAc)<sub>2</sub>, 10.0 mol % RuPhos, and 1.20 equiv of potassium 4-*N,N*-dimethylaminophenyl trifluoroborate, R<sub>F</sub> = 0.46, 20% MTBE:hexanes; purified using automated flash column chromatography using an MTBE:hexanes gradient mobile phase employing a 2.5% isocratic hold; isolated yield 0.096 g, 52%; yellow-orange solid; mp = 111.0–113.6 °C; <sup>1</sup>H NMR (500 MHz, CDCl<sub>3</sub>): δ 9.89 (s, 1H), 7.33–7.28 (m, 2H), 6.73–6.69 (m, 2H), 3.02 (s, 6H), 2.99–2.94 (m, 2H), 2.77–2.72 (m, 2H), 1.97 (pent, *J* = 7.5 Hz, 2H); <sup>13</sup>C NMR (125 MHz, CDCl<sub>3</sub>): δ 190.7, 163.0, 151.3, 137.0, 130.4, 122.7, 111.7, 40.3, 39.2, 31.3, 21.8; IR (ATR-CDCl<sub>3</sub>):  $\bar{\nu}_{max}$  = 2967, 2933, 2830, 1637, 1608, 1585, 1235, 824 cm<sup>-1</sup>; HRMS (EI): *m/z* calculated for C<sub>14</sub>H<sub>17</sub>NO: 215.1310; found: 215.1309.

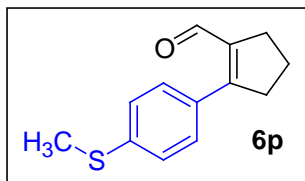

**2-(4-Methylsulfanylphenyl)-cyclopent-1-enecarbaldehyde (6p)-**

**precursor to 8r:** Prepared according to the general procedure discussed

above with **4** (0.857 mmol): 5.0 mol % Pd(OAc)<sub>2</sub>, 10.0 mol % RuPhos,

and 1.20 equiv of potassium 4-methylsulfanylphenyl trifluoroborate, R<sub>F</sub> = 0.54, 20%

MTBE:hexanes; purified using automated flash column chromatography using an MTBE:hexanes

gradient mobile phase employing a 2.5% isocratic hold; isolated yield 0.135 g, 72%; yellow solid;

mp = 51.2–52.3 °C; <sup>1</sup>H NMR (500 MHz, CDCl<sub>3</sub>): δ 9.84 (s, 1H), 7.30–7.25 (m, 4H), 3.00–2.94

(m, 2H), 2.78–2.73 (m, 2H), 2.51 (s, 3H), 2.00 (pent, *J* = 7.5 Hz, 2H); <sup>13</sup>C NMR (125 MHz,

CDCl<sub>3</sub>): δ 190.3, 161.9, 140.8, 139.4, 131.5, 129.2, 126.0, 39.6, 31.3, 21.8, 15.5; IR (ATR-CDCl<sub>3</sub>):

$\bar{\nu}_{max}$  = 2954, 2921, 2833, 1656, 1592, 1096, 819 cm<sup>-1</sup>; HRMS (EI): *m/z* calculated for C<sub>13</sub>H<sub>14</sub>OS:

218.0765; found: 218.0759.

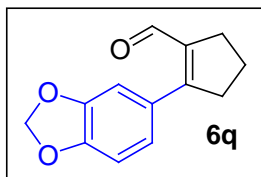

**2-Benzo[1,3]dioxol-5-yl-cyclopent-1-enecarbaldehyde (6q)-precursor**

**to 8s:** Prepared according to the general procedure discussed above with **4**

(0.89 mmol): 5.0 mol % Pd(OAc)<sub>2</sub>, 10.0 mol % RuPhos, and 1.20 equiv of

potassium 2-benzo[1,3]dioxol-5-yltrifluoroborate, R<sub>F</sub> = 0.57, 20% MTBE:hexanes; purified using

automated flash column chromatography using an MTBE:hexanes gradient mobile phase

employing a 2.5% isocratic hold; isolated yield 0.108 g, 56%; pale-yellow solid; mp = 84.9–86.7

°C; <sup>1</sup>H NMR (500 MHz, CDCl<sub>3</sub>): δ 9.85 (s, 1H), 6.89–6.83 (m, 3H), 6.02 (s, 2H), 2.96–2.92 (m,

2H), 2.76–2.72 (m, 2H), 1.99 (pent, *J* = 7.5 Hz, 2H); <sup>13</sup>C NMR (125 MHz, CDCl<sub>3</sub>): δ 190.4, 162.0,

148.8, 148.1, 139.2, 129.0, 123.3, 108.9, 108.5, 101.6, 39.8, 31.3, 21.7; IR (ATR-CDCl<sub>3</sub>):  $\bar{\nu}_{max}$  =

2960, 2904, 2850, 1652, 1598, 1503, 1487, 1241, 1037 cm<sup>-1</sup>; HRMS (EI): *m/z* calculated for

C<sub>13</sub>H<sub>12</sub>O<sub>3</sub>: 216.0786; found: 216.0783.

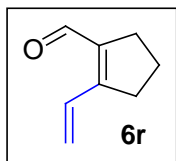

**2-Vinyl-cyclopent-1-enecarbaldehyde (6r)-precursor to 8u:** Prepared

according to the general procedure discussed above with **4** (0.86 mmol): 5.0 mol % Pd(OAc)<sub>2</sub>, 10.0 mol % RuPhos, and 1.20 equiv of potassium vinyl

trifluoroborates; purified using automated flash column chromatography using an MTBE:hexanes gradient mobile phase employing a 2.5% isocratic hold; isolated yield 0.094 g, 90%; <sup>1</sup>H NMR (500 MHz, CDCl<sub>3</sub>): δ 10.20 (s, 1H), 7.26 (dd, *J* = 17.0, 10.8 Hz, 1H), 5.55 (d, *J* = 17.0 Hz, 1H), 5.54 (d, *J* = 10.8 Hz, 1H), 2.77 (br-t, *J* = 7.5 Hz, 2H), 2.66 (br-t, *J* = 7.5 Hz, 2H), 1.91 (pent, *J* = 7.5 Hz, 2H). *This compound is extremely unstable at ambient temperature outside of solution. Spectral data was acquired with residual solvent from purification to prevent compound degradation and is consistent with literature values.*<sup>4</sup>

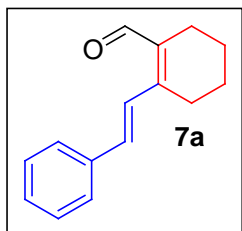

**2-Styryl-cyclohex-1-enecarbaldehyde (7a)-precursor to 9a:** Prepared

according to the general procedure discussed above with **5** (0.747 mmol): 5.0 mol % Pd(OAc)<sub>2</sub>, 10.0 mol % RuPhos, and 1.20 equiv potassium styryltrifluoroborate, R<sub>F</sub> = 0.72, 20% MTBE:hexanes; purified using

automated flash column chromatography using an MTBE:hexanes gradient mobile phase employing a 5.0% isocratic hold; isolated yield 0.134 g, 85%; amorphous; <sup>1</sup>H NMR (500 MHz, CDCl<sub>3</sub>): δ 10.48 (s, 1H), 7.76 (d, *J* = 16.0 Hz, 1H), 7.49–7.46 (m, 2H), 7.40–7.34 (m, 2H), 7.33–7.28 (m, 1H), 6.87 (d, *J* = 16.0 Hz, 1H), 2.60–2.54 (br-m, 2H), 2.39–2.34 (br-m, 2H), 1.77–1.70 (m, 2H), 1.69–1.63 (m, 2H); <sup>13</sup>C NMR (125 MHz, CDCl<sub>3</sub>): δ = 190.6, 151.8, 136.8, 135.9, 133.6, 129.0, 128.8, 127.1, 123.5, 27.7, 23.4, 22.1, 21.7; IR (ATR-CDCl<sub>3</sub>):  $\bar{\nu}_{max}$  = 3056, 3024, 2932, 2861, 1658, 1614, 1583, 1148, 749, 691 cm<sup>-1</sup>; HRMS (EI): *m/z* calculated for C<sub>15</sub>H<sub>16</sub>O: 212.1201; found: 212.1196.

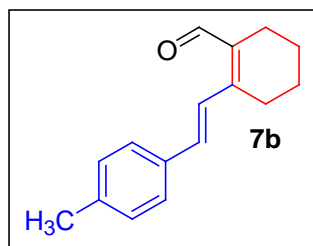

**2-(2-*p*-Tolyl-vinyl)-cyclohex-1-enecarbaldehyde (7b)-precursor to**

**9b:** Prepared according to the general procedure discussed above with **5** (0.747): 5.0 mol % Pd(OAc)<sub>2</sub>, 10.0 mol % RuPhos, and 1.20 equiv of 4-methylstyrenylboronic acid, R<sub>F</sub> = 0.72, 20% MTBE:hexanes; purified

using automated flash column chromatography using an MTBE:hexanes gradient mobile phase employing a 2.5% isocratic hold; isolated yield 0.104 g, 62%; pale-yellow solid; mp = 82.3–84.6 °C; <sup>1</sup>H NMR (500 MHz, CD<sub>3</sub>OD): δ 10.41 (s, 1H), 7.84 (d, *J* = 16.0 Hz, 1H), 7.44 (d, *J* = 8.2 Hz, 2H), 7.17 (d, *J* = 8.2 Hz, 2H), 6.92 (d, *J* = 16.0 Hz, 1H), 2.62–2.56 (br-m, 2H), 2.33 (s, 3H), 2.32–2.27 (br-m, 2H), 1.75–1.69 (m, 2H), 1.67–1.61 (m, 2H); <sup>13</sup>C NMR (125 MHz, CD<sub>3</sub>OD): δ 192.5, 154.4, 139.9, 136.1, 135.3, 135.1, 130.5, 128.2, 123.2, 28.4, 24.2, 23.1, 22.7, 21.3; IR (ATR-CD<sub>3</sub>OD):  $\bar{\nu}_{max}$  = 3014, 2868, 2925, 1644, 1614, 1602, 1578, 1150, 960, 804 cm<sup>-1</sup>; HRMS (EI): *m/z* calculated for C<sub>16</sub>H<sub>18</sub>O: 226.1358; found: 226.1353.

**Table S2.** Pyridine and benzene core aldehyde synthons for analogue preparation.

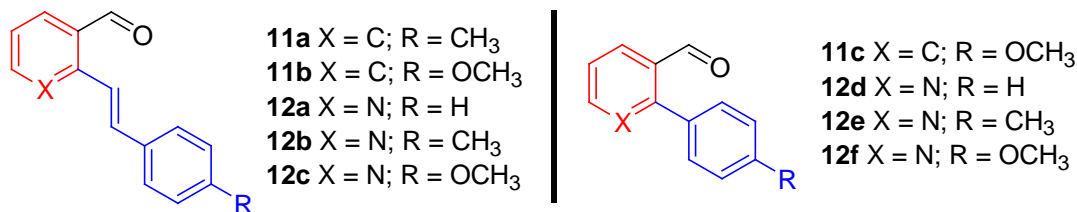

Compounds **11a** and **11b** are known in the primary literature.<sup>3</sup>

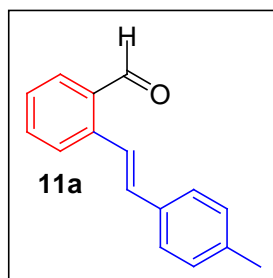

**2-(2-*p*-Tolyl-vinyl)-benzaldehyde (11a)-precursor to 13a:** Prepared according to the general procedure discussed above with 2-bromobenzaldehyde (0.81 mmol): 5.0 mol % Pd(OAc)<sub>2</sub>, 10.0 mol % RuPhos, and 1.20 equiv potassium 4-methoxyphenyltrifluoroborate, R<sub>F</sub> = 0.78, 20%

MTBE:hexanes; purified using automated flash column chromatography employing an MTBE:hexanes gradient mobile phase with an isocratic hold at 20%; isolated yield 0.108 g, 60%; yellow solid; <sup>1</sup>H NMR (500 MHz, CDCl<sub>3</sub>): δ 10.34 (s, 1H), 8.00 (d, *J* = 16.0 Hz, 1H), 7.84 (dd, *J* = 7.8, 1.0 Hz, 1H), 7.72 (d, *J* = 7.8 Hz, 1H), 7.58 (t, *J* = 7.8 Hz, 1H), 7.47 (d, *J* = 8.0 Hz, 2H), 7.42 (t, *J* = 7.5 Hz, 1H), 7.20 (d, *J* = 8.0 Hz, 2H), 7.04 (d, *J* = 16.0 Hz, 1H), 2.38 (s, 3H); <sup>13</sup>C NMR (125 MHz, CDCl<sub>3</sub>): δ 192.8, 140.4, 138.5, 134.3, 134.2, 133.8, 133.0, 132.3, 129.6, 127.5, 127.2, 127.0, 123.7, 21.4; IR (ATR-CDCl<sub>3</sub>):  $\bar{\nu}_{max}$  = 3022, 2919, 2855, 2733, 1689, 1628, 1564, 1594, 1513, 1478, 1449, 1182, 963, 803, 754, 726, 535 cm<sup>-1</sup>; HRMS (EI): *m/z* calculated for C<sub>16</sub>H<sub>14</sub>O: 222.1045; found: 222.1043.

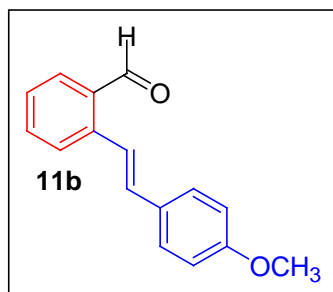

**2-[2-(4-Methoxy-phenyl)-vinyl]-benzaldehyde (11b)-precursor to**

**13b:** : Prepared according to the general procedure discussed above with 2-bromo-benzaldehyde (0.81 mmol): 5.0 mol % Pd(OAc)<sub>2</sub>, 10.0 mol % RuPhos, and 1.05 equiv 4-methoxyphenylboronic acid, R<sub>F</sub> =

0.57, 20% MTBE:hexanes; purified using automated flash column chromatography employing an MTBE:hexanes gradient mobile phase with an isocratic hold at 10%; isolated yield 0.104 g, 54%; amorphous; <sup>1</sup>H NMR (500 MHz, CDCl<sub>3</sub>): δ 10.33 (s, 1H), 7.91 (d, *J* = 16.3 Hz, 1H), 7.82 (dd, *J* = 7.8, 1.3 Hz, 1H), 7.70 (d, *J* = 8.0 Hz, 1H), 7.57 (dt, *J* = 7.8, 1.3 Hz, 1H), 7.53–7.48 (m, 2H), 7.41 (dt, *J* = 7.8, 1.3 Hz, 1H), 7.01 (d, *J* = 16.3 Hz, 1H), 6.94–6.90 (m, 2H), 3.84 (s, 3H); <sup>13</sup>C NMR (125 MHz, CDCl<sub>3</sub>): δ 192.8, 159.9, 140.4, 133.8, 133.7, 132.8, 132.3, 129.8, 128.4, 127.3, 127.0, 122.3, 114.3, 55.4; IR (ATR-CDCl<sub>3</sub>):  $\bar{\nu}_{max}$  = 3035, 2934, 2836, 2740, 1693, 1605, 1594, 1511, 1250, 1175, 1032, 820 cm<sup>-1</sup>; HRMS (ED): *m/z* calculated for C<sub>16</sub>H<sub>14</sub>O<sub>2</sub>: 238.0994; found: 238.0995.

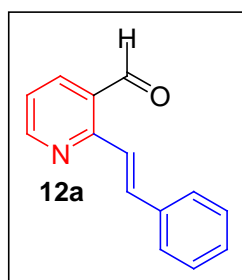

**2-Styryl-pyridine-3-carbaldehyde (12a)-precursor to 14a:** Prepared

according to the general procedure discussed above with 2-bromo-pyridine-3-carbaldehyde (0.81 mmol): 2.5 mol % Pd(OAc)<sub>2</sub>, 5.0 mol % RuPhos, and 1.20 equiv potassium styryltrifluoroborate, R<sub>F</sub> = 0.26, 20% MTBE:hexanes;

purified using automated flash column chromatography employing an MTBE:hexanes gradient mobile phase; isolated yield 0.138 g, 82%; yellow solid; mp = 59.3–63.1 °C; <sup>1</sup>H NMR (500 MHz, CDCl<sub>3</sub>): δ 10.40 (s, 1H), 8.78 (dd, *J* = 4.8, 1.8 Hz, 1H), 8.11 (dd, *J* = 7.8, 1.8 Hz, 1H), 8.10 (d, *J* = 15.6 Hz, 1H), 7.97 (d, *J* = 15.6 Hz, 1H), 7.68–7.64 (m, 2H), 7.43–7.38 (m, 2H), 7.37–7.32 (m, 2H); <sup>13</sup>C NMR (125 MHz, CDCl<sub>3</sub>): δ 191.4, 156.2, 153.4, 139.8, 138.6, 136.4, 129.4, 129.0,

127.96, 127.93, 122.5, 122.3; IR (ATR-CDCl<sub>3</sub>):  $\bar{\nu}_{max}$  = 3058, 2862, 2817, 2743, 1700, 1629, 1577, 1551, 1450, 1435, 1398, 772, 690 cm<sup>-1</sup>; HRMS (EI):  $m/z$  calculated for C<sub>14</sub>H<sub>11</sub>NO: 209.0841; found: 209.0833.

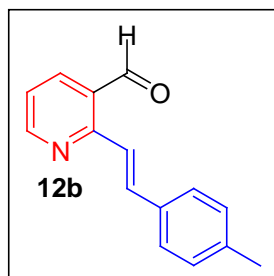

**2-(2-*p*-Tolyl-vinyl)-pyridine-3-carbaldehyde (12b)-precursor to 14b:**

Prepared according to the general procedure discussed above with 2-bromo-pyridine-3-carbaldehyde (0.81 mmol): 5.0 mol % Pd(OAc)<sub>2</sub>, 10.0 mol % RuPhos, and 1.05 equiv trans-2-(4-methylphenyl)vinylboronic acid,

R<sub>F</sub> = 0.26, 20% MTBE:hexanes; purified using automated flash column chromatography employing an MTBE:hexanes gradient mobile phase; isolated yield 0.041 g, 31%; pale-yellow solid; mp = 80.0–82.2 °C; <sup>1</sup>H NMR (500 MHz, CDCl<sub>3</sub>): δ 10.41 (s, 1H), 8.77 (dd, *J* = 4.7, 1.9 Hz, 1H), 8.11 (dd, *J* = 7.8, 1.9 Hz, 1H), 8.05 (d, *J* = 15.6 Hz, 1H), 7.95 (d, *J* = 15.6 Hz, 1H), 7.56 (d, *J* = 8.0 Hz, 2H), 7.32 (dd, *J* = 7.8, 4.7 Hz, 1H), 7.21 (d, *J* = 8.0 Hz, 2H), 2.39 (s, 3H); <sup>13</sup>C NMR (125 MHz, CDCl<sub>3</sub>): δ 191.5, 156.6, 153.6, 139.5, 138.3, 138.3X (overlaps with 138.3), 133.7, 129.7, 127.9, 127.8, 122.1, 121.7, 21.6; IR (ATR-CDCl<sub>3</sub>):  $\bar{\nu}_{max}$  = 3023, 2857, 2734, 1691, 1627, 1553, 1437, 811 cm<sup>-1</sup>; HRMS (EI):  $m/z$  calculated for C<sub>15</sub>H<sub>13</sub>NO: 223.0997; found: 223.0999.

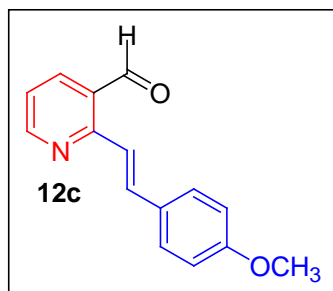

**2-[2-(4-Methoxy-phenyl)-vinyl]-pyridine-3-carbaldehyde (12c)-**

**precursor to 14c:** Prepared according to the general procedure discussed above with 2-bromo-pyridine-3-carbaldehyde (0.54 mmol): 5.0 mol % Pd(OAc)<sub>2</sub>, 10.0 mol % RuPhos, and 1.05 equiv trans-2-(4-methoxyphenyl)vinylboronic acid, R<sub>F</sub> = 0.14, 20% MTBE:hexanes;

purified using automated flash column chromatography employing an MTBE:hexanes gradient



mobile phase; isolated yield 0.101 g, 78%; pale-yellow solid; mp = 64.1–66.0 °C;  $^1\text{H}$  NMR (500 MHz,  $\text{CDCl}_3$ ):  $\delta$  10.39 (s, 1H), 8.75 (dd,  $J = 4.7, 1.8$  Hz, 1H), 8.09 (dd,  $J = 7.8, 1.8$  Hz, 1H), 7.99 (d,  $J = 15.6$  Hz, 1H), 7.93 (d,  $J = 15.6$  Hz, 1H), 7.64–7.58 (m, 2H), 7.30 (dd,  $J = 7.8, 4.7$  Hz, 1H), 6.96–6.91 (m, 2H), 3.86 (s, 3H);  $^{13}\text{C}$  NMR (125 MHz,  $\text{CDCl}_3$ ):  $\delta$  191.6, 160.7, 156.7, 153.6, 139.7, 138.0, 129.4, 129.3, 127.6, 121.8, 120.4, 114.4, 55.5; IR (ATR- $\text{CDCl}_3$ ):  $\bar{\nu}_{\text{max}} = 2934, 2837, 2739, 1692, 1626, 1552, 1510, 1252, 1173, 826$   $\text{cm}^{-1}$ ; HRMS (EI):  $m/z$  calculated for  $\text{C}_{15}\text{H}_{13}\text{NO}_2$ : 239.0946; found: 239.0954.

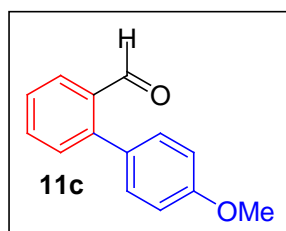

**4'-Methoxy-biphenyl-2-carbaldehyde (11c)-precursor to (13c):**

Prepared according to the general procedure discussed above with 2-bromo-benzaldehyde (0.81 mmol): 5.0 mol %  $\text{Pd}(\text{OAc})_2$ , 10.0 mol % RuPhos, and 1.20 equiv potassium 4-methoxyphenyl trifluoroborate,  $R_F = 0.44$ , 20% MTBE:hexanes; purified using automated flash column chromatography employing an MTBE:hexanes gradient mobile phase; isolated yield 0.150 g, 87%; yellow solid;  $^1\text{H}$  NMR (500 MHz,  $\text{CDCl}_3$ ):  $\delta$  10.00 (s, 1H), 8.00 (dd,  $J = 7.5, 1.4$  Hz, 1H), 7.62 (dt,  $J = 7.5, 1.4$  Hz, 1H), 7.47–7.72 (m, 2H), 7.36–7.29 (m, 2H), 7.05–6.97 (m, 2H), 3.88 (s, 3H);  $^{13}\text{C}$  NMR (125 MHz,  $\text{CDCl}_3$ ):  $\delta$  192.8, 159.9, 145.8, 133.9, 133.7, 131.5, 130.9, 130.2, 127.8, 127.5, 114.1, 55.6; IR (ATR- $\text{CDCl}_3$ ):  $\bar{\nu}_{\text{max}} = 3035, 3961, 3838, 2755, 1691, 1610, 1597, 1515, 1474, 1247, 1179, 836, 766$   $\text{cm}^{-1}$ ; HRMS (EI):  $m/z$  calculated for  $\text{C}_{14}\text{H}_{12}\text{O}_2$ : 212.0837; found: 212.0828. *Spectral data acquired was consistent with literature values.*<sup>5</sup>

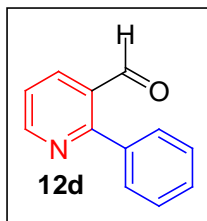

**2-Phenyl-pyridine-3-carbaldehyde (12d)-precursor to 14d:** Prepared according to the general procedure discussed above with 2-bromo-pyridine-3-carbaldehyde (0.81 mmol): 2.5 mol % Pd(OAc)<sub>2</sub>, 5.0 mol % RuPhos, and 1.20 equiv potassium phenyltrifluoroborate,  $R_F = 0.28$ , 20% MTBE:hexanes;

purified using automated flash column chromatography employing an MTBE:hexanes gradient mobile phase; isolated yield 0.102 g, 68%; yellow oil; <sup>1</sup>H NMR (500 MHz, CDCl<sub>3</sub>): δ 10.07 (d,  $J = 0.8$  Hz, 1H), 8.89 (dd,  $J = 4.8, 1.8$  Hz, 1H), 8.32 (dd,  $J = 7.9, 1.8$  Hz, 1H), 7.63–7.58 (m, 2H), 7.57–7.51 (m, 3H), 7.45 (ddd,  $J = 7.9, 4.8, 1.8$  Hz, 1H); <sup>13</sup>C NMR (125 MHz, CDCl<sub>3</sub>): δ 191.8, 162.4, 153.6, 137.2, 136.1, 130.5, 129.8, 129.7, 128.8, 122.7; IR (ATR- CDCl<sub>3</sub>):  $\bar{\nu}_{max} = 3044, 2925, 2858, 2748, 1695, 1615, 1580, 1557, 1433, 1386, 1247, 828, 799, 770$  cm<sup>-1</sup>; HRMS (EI):  $m/z$  calculated for C<sub>12</sub>H<sub>9</sub>NO: 183.0684; found: 183.0836.

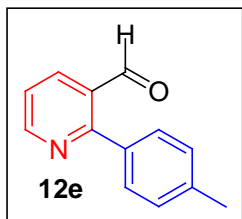

**2-*p*-Tolyl-pyridine-3-carbaldehyde (12e)-precursor to 14e:** Prepared according to the general procedure discussed above with 2-bromo-pyridine-3-carbaldehyde (0.81 mmol): 5.0 mol % Pd(OAc)<sub>2</sub>, 10.0 mol % RuPhos, 1.20 equiv potassium 4-methylphenyltrifluoroborate,  $R_F = 0.31$ , 20%

MTBE:hexanes; purified using automated flash column chromatography employing an MTBE:hexanes gradient mobile phase with an isocratic hold at 25%; isolated yield 0.067 g, 43%; pale-yellow solid; mp = 78.4–81.5 °C; <sup>1</sup>H NMR (500 MHz, CDCl<sub>3</sub>): δ 10.06 (d,  $J = 0.8$  Hz, 1H), 8.87 (dd,  $J = 4.8, 1.8$  Hz, 1H), 8.29 (dd,  $J = 8.0, 1.8$  Hz, 1H), 7.51–7.47 (m, 2H), 7.42 (ddd,  $J = 8.0, 4.8, 0.8$  Hz, 1H), 7.35–7.32 (m, 2H), 2.45 (s, 3H); <sup>13</sup>C NMR (125 MHz, CDCl<sub>3</sub>): δ 192.1, 162.5, 153.6, 140.0, 136.0, 134.4, 130.6, 129.6, 129.5, 122.4, 21.5; IR (ATR-CDCl<sub>3</sub>):  $\bar{\nu}_{max} = 3040,$

2920, 2858, 2748, 1695, 1580, 1433, 1386, 1247, 828, 799, 770  $\text{cm}^{-1}$ ; HRMS (EI):  $m/z$  calculated for  $\text{C}_{13}\text{H}_{11}\text{NO}$ : 197.0841; found: 197.0836.

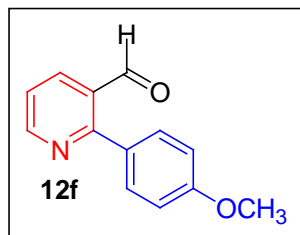

**2-(4-Methoxy-phenyl)-pyridine-3-carbaldehyde (12f)-precursor to**

**14f:** Prepared according to the general procedure discussed above with

2-bromo-pyridine-3-carbaldehyde (0.81 mmol): 5.0 mol %  $\text{Pd}(\text{OAc})_2$ ,

10.0 mol % RuPhos, and 1.20 equiv potassium 4-

methoxyphenyltrifluoroborate,  $R_F = 0.18$ , 20% MTBE:hexanes; purified using automated flash

column chromatography employing an MTBE:hexanes gradient mobile phase; isolated yield 0.118

g, 69%; white solid; mp = 67.0–68.4  $^{\circ}\text{C}$ ;  $^1\text{H}$  NMR (500 MHz,  $\text{CDCl}_3$ ):  $\delta$  10.06 (d,  $J = 0.8$  Hz, 1H),

8.85 (dd,  $J = 4.7, 1.9$  Hz, 1H), 8.28 (dd,  $J = 7.9, 1.9$  Hz, 1H), 7.57–7.54 (m, 2H), 7.39 (ddd,  $J =$

7.9, 4.7, 0.8 Hz, 1H), 7.07–7.03 (m, 2H), 3.91 (s, 3H);  $^{13}\text{C}$  NMR (125 MHz,  $\text{CDCl}_3$ ):  $\delta$  192.1,

162.0, 161.1, 153.6, 136.1, 132.1, 129.7, 129.4, 122.2, 114.3, 56.6; IR (ATR- $\text{CDCl}_3$ ):  $\bar{\nu}_{\text{max}} = 3056,$

2970, 2840, 2747, 1695, 1681, 1607, 1580, 1515, 1432, 1387, 1251, 1176, 840, 776, 730  $\text{cm}^{-1}$ ;

HRMS (EI):  $m/z$  calculated for  $\text{C}_{13}\text{H}_{11}\text{NO}_2$ : 213.0790; found: 213.0797.

**Table S3.** Thiophene core aldehyde synthons for analogue preparation.

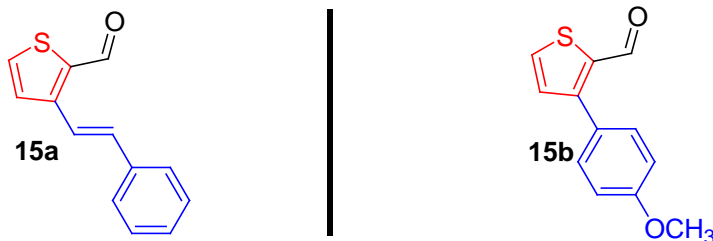

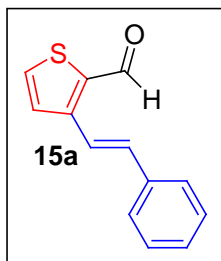

**3-Styryl-thiophene-2-carbaldehyde (15a)-precursor to 16a:** Prepared

according to the general procedure discussed above with 3-bromo-thiophene-2-carbaldehyde (0.79 mmol): 5.0 mol % Pd(OAc)<sub>2</sub>, 10.0 mol % RuPhos, and 1.05 equiv potassium styrenyltrifluoroborate, R<sub>F</sub> = 0.60, 20% MTBE:hexanes;

purified using automated flash column chromatography employing an MTBE:hexanes gradient mobile phase; isolated yield 0.068 g, 41%; light-brown solid; mp = 104.1–106.5 °C; <sup>1</sup>H NMR (500 MHz, CDCl<sub>3</sub>): δ 10.22 (s, 1H), 7.69 (d, *J* = 16.3 Hz, 1H), 7.68 (d, *J* = 5.0 Hz, 1H), 7.56–7.52 (m, 2H), 7.46 (d, *J* = 5.0 Hz, 1H), 7.42–7.37 (m, 2H), 7.35–7.31 (m, 1H), 7.18 (d, *J* = 16.3 Hz, 1H); <sup>13</sup>C NMR (125 MHz, CDCl<sub>3</sub>): δ 182.8, 146.9, 137.7, 136.4, 134.9, 134.5, 129.1, 129.0, 127.1, 126.9, 119.5; IR (ATR-CDCl<sub>3</sub>):  $\bar{\nu}_{max}$  = 3101, 3077, 3023, 2833, 1652, 1626, 1433, 1196, 956, 758, 692 cm<sup>-1</sup>; HRMS (EI): *m/z* calculated for C<sub>13</sub>H<sub>10</sub>OS: 214.0452; found: 214.0452.

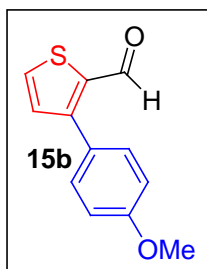

**3-(4-Methoxy-phenyl)-thiophene-2-carbaldehyde (15b)-precursor to 16b:**

Prepared according to the general procedure discussed above with 3-bromo-thiophene-2-carbaldehyde (0.79 mmol): 5.0 mol % Pd(OAc)<sub>2</sub>, 10.0 mol % RuPhos, and 1.05 equiv potassium 4-methoxyphenyltrifluoroborate, R<sub>F</sub> = 0.37,

20% MTBE:hexanes; purified using automated flash column chromatography employing an MTBE:hexanes gradient mobile phase with an isocratic hold at 25%; isolated yield 0.039 g, 23%; light-brown solid; mp = 65.7–68.5 °C; <sup>1</sup>H NMR (500 MHz, CDCl<sub>3</sub>): δ 9.88 (s, 1H), 7.73–7.71 (m, 1H), 7.44–7.39 (m, 2H), 7.20 (d, *J* = 4.9 Hz, 1H), 7.04–6.98 (m, 2H), 3.87 (s, 3H); <sup>13</sup>C NMR (125 MHz, CDCl<sub>3</sub>): δ 184.5, 160.4, 151.5, 138.0, 134.2, 131.0, 130.7, 126.6, 114.5, 55.6; IR (ATR-CDCl<sub>3</sub>):  $\bar{\nu}_{max}$  = 2970, 2838, 1654, 1607, 1500, 1250, 1178, 1029, 754 cm<sup>-1</sup>; HRMS (EI): *m/z* calculated for C<sub>12</sub>H<sub>10</sub>O<sub>2</sub>S: 218.0402; found: 218.0410.

## References

- <sup>1</sup> For compound **6a** see: Knobloch, K.; Koch, J.; Keller, M.; Eberbach, W. The Dipolar Route to Azepin-3-one Derivatives by Heterocyclization of Linear and Monocyclic Enallenyl Nitrones as the Key Step. *European Journal of Organic Chemistry* **2005**, *13*, 2715–2733. For compound **6k** see: Vogel, C.; Schnippenkoetter, B.; Jones, P. G.; Bubenitschek, P. Cycloalkano-2H-pyrrole as Stable Intermediate in the Rearrangement of  $\beta$ -cycloalkenyl- $\alpha$ -azidoacry Esters to Cycloalkano-1H-pyrrole. *Angewandte Chemie, International Edition* **1993**, *32*, 1051–1052. For compound **6r** see: Yoshida, K.; Takahashi, H.; Imamoto, T. Synthesis of Substituted Benzenes and Phenols by Ring-Closing Olefin Metathesis. *Chemistry-A European Journal* **2008**, *14*, 8246–8261.
- <sup>2</sup> Xiao, Z. S.; Riccardi, D.; Velazquez, H. A.; Chin, A.-L.; Yates, C. R.; Carrick, J. D.; Smith, J. C.; Baudry, J.; Quarles, L. D. Computationally Identified Novel Chemical Compounds that Antagonize FGF-23. *Science Signaling* **2016**, *9*(455), ra113-Cover Story.
- <sup>3</sup> For compound **11a** see: Nallasivam, J. L.; Fernandes, R. A. Development of Unimolecular Tetrakis(piperidin-4-ol) as a Ligand for Suzuki-Miyaura Cross-Coupling Reactions: Synthesis of Incrustoporin and Preclamol. *European Journal of Organic Chemistry* **2015**, *16*, 3558–3567. For compound **11b** see: Discovery of Aryl-biphenyl-2-ylmethylpiperazines as Novel Scaffolds for 5-HT<sub>7</sub> Ligands and Role of the Aromatic Substituents Binding to the Target Receptor. *Biorganic and Medicinal Chemistry* **2013**, *21*, 2568–2676.

JWC-B-151 (2)  
RCHO of MD-3

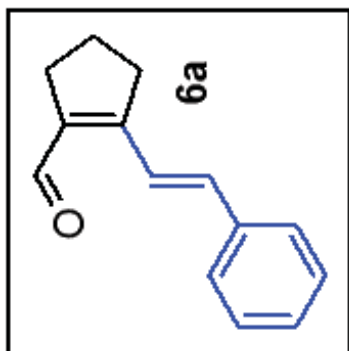

S26

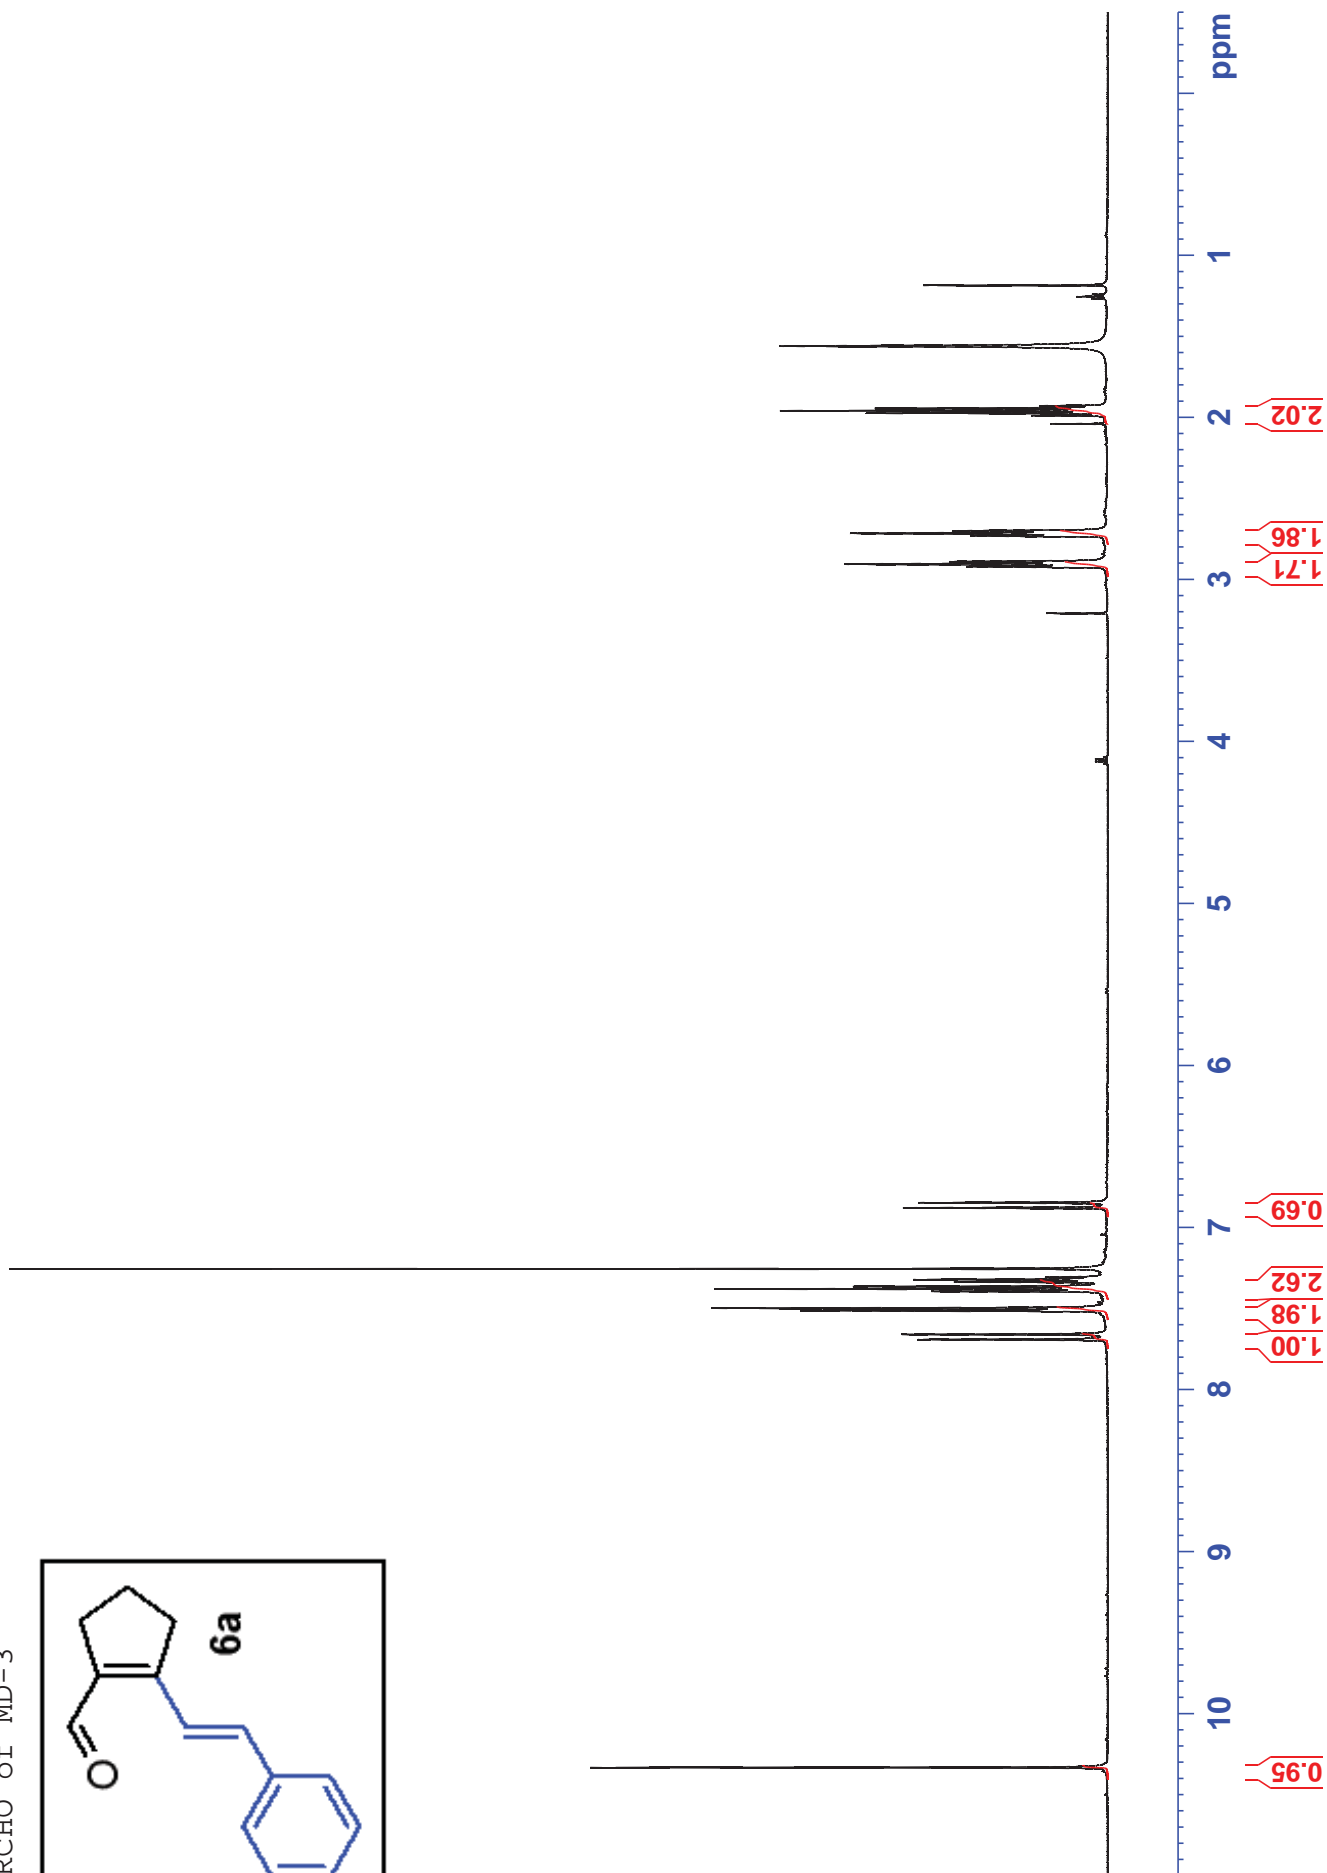

JWC-FGF23-A-73 (2)  
RCHO of MD-3-A8

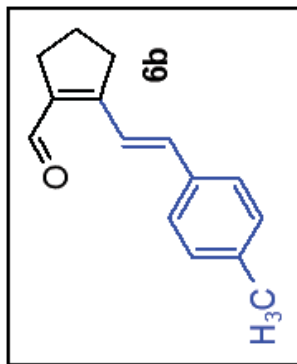

S27

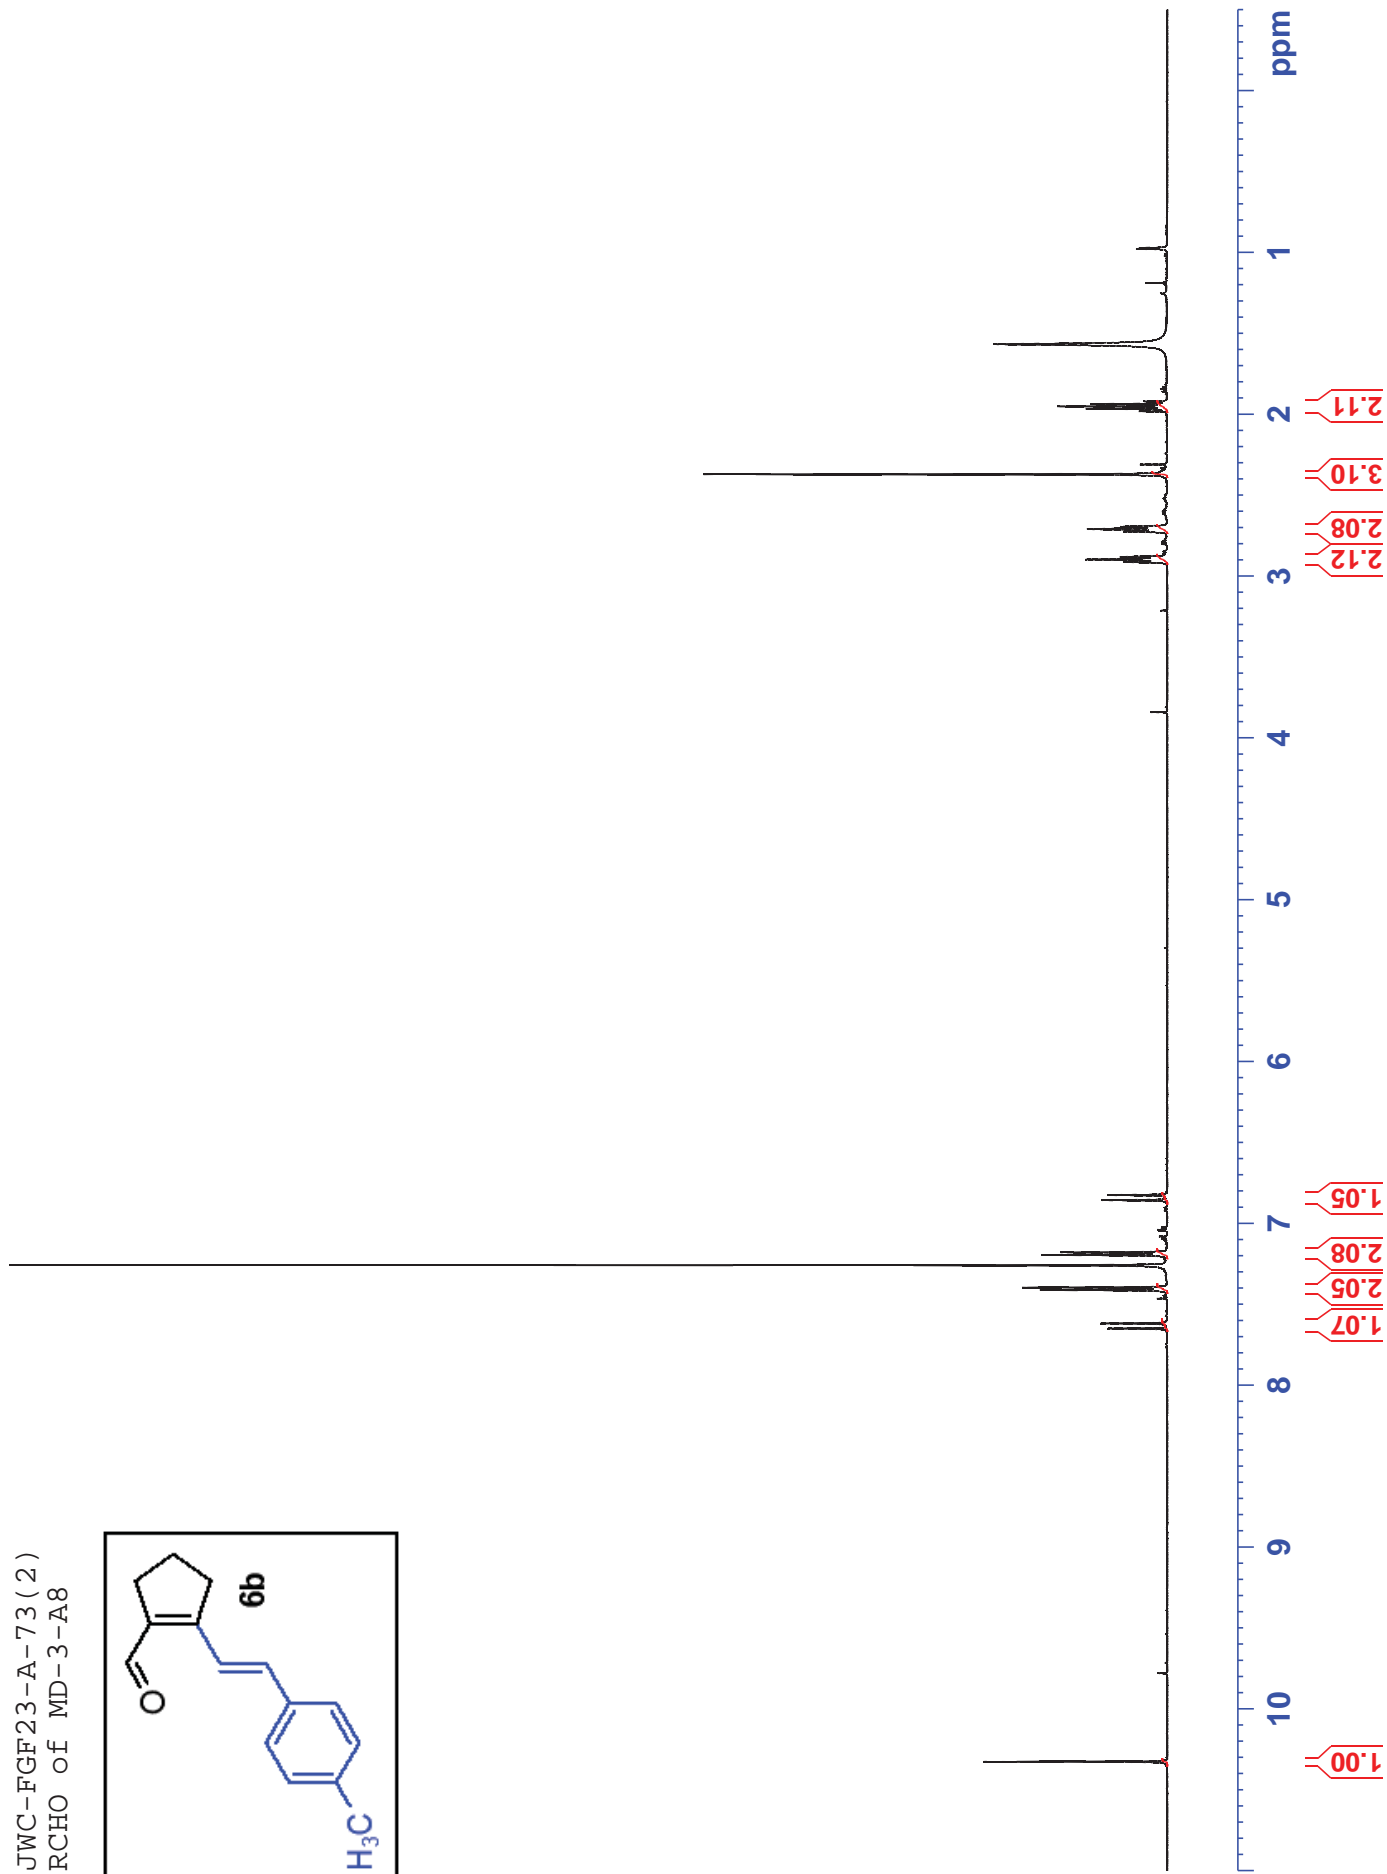

JWC-FGF23-A-73 (2)  
RCHO of MD-3-A8

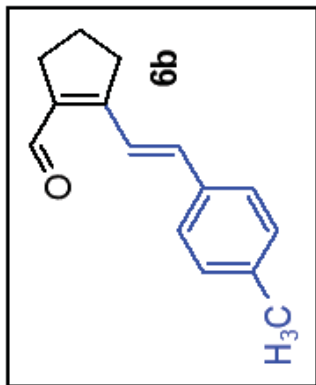

- 187.63
- 158.20
- 139.45
- 139.40
- 136.83
- 133.64
- 129.78
- 127.30
- 119.15
- 34.91
- 31.24
- 21.53
- 21.48

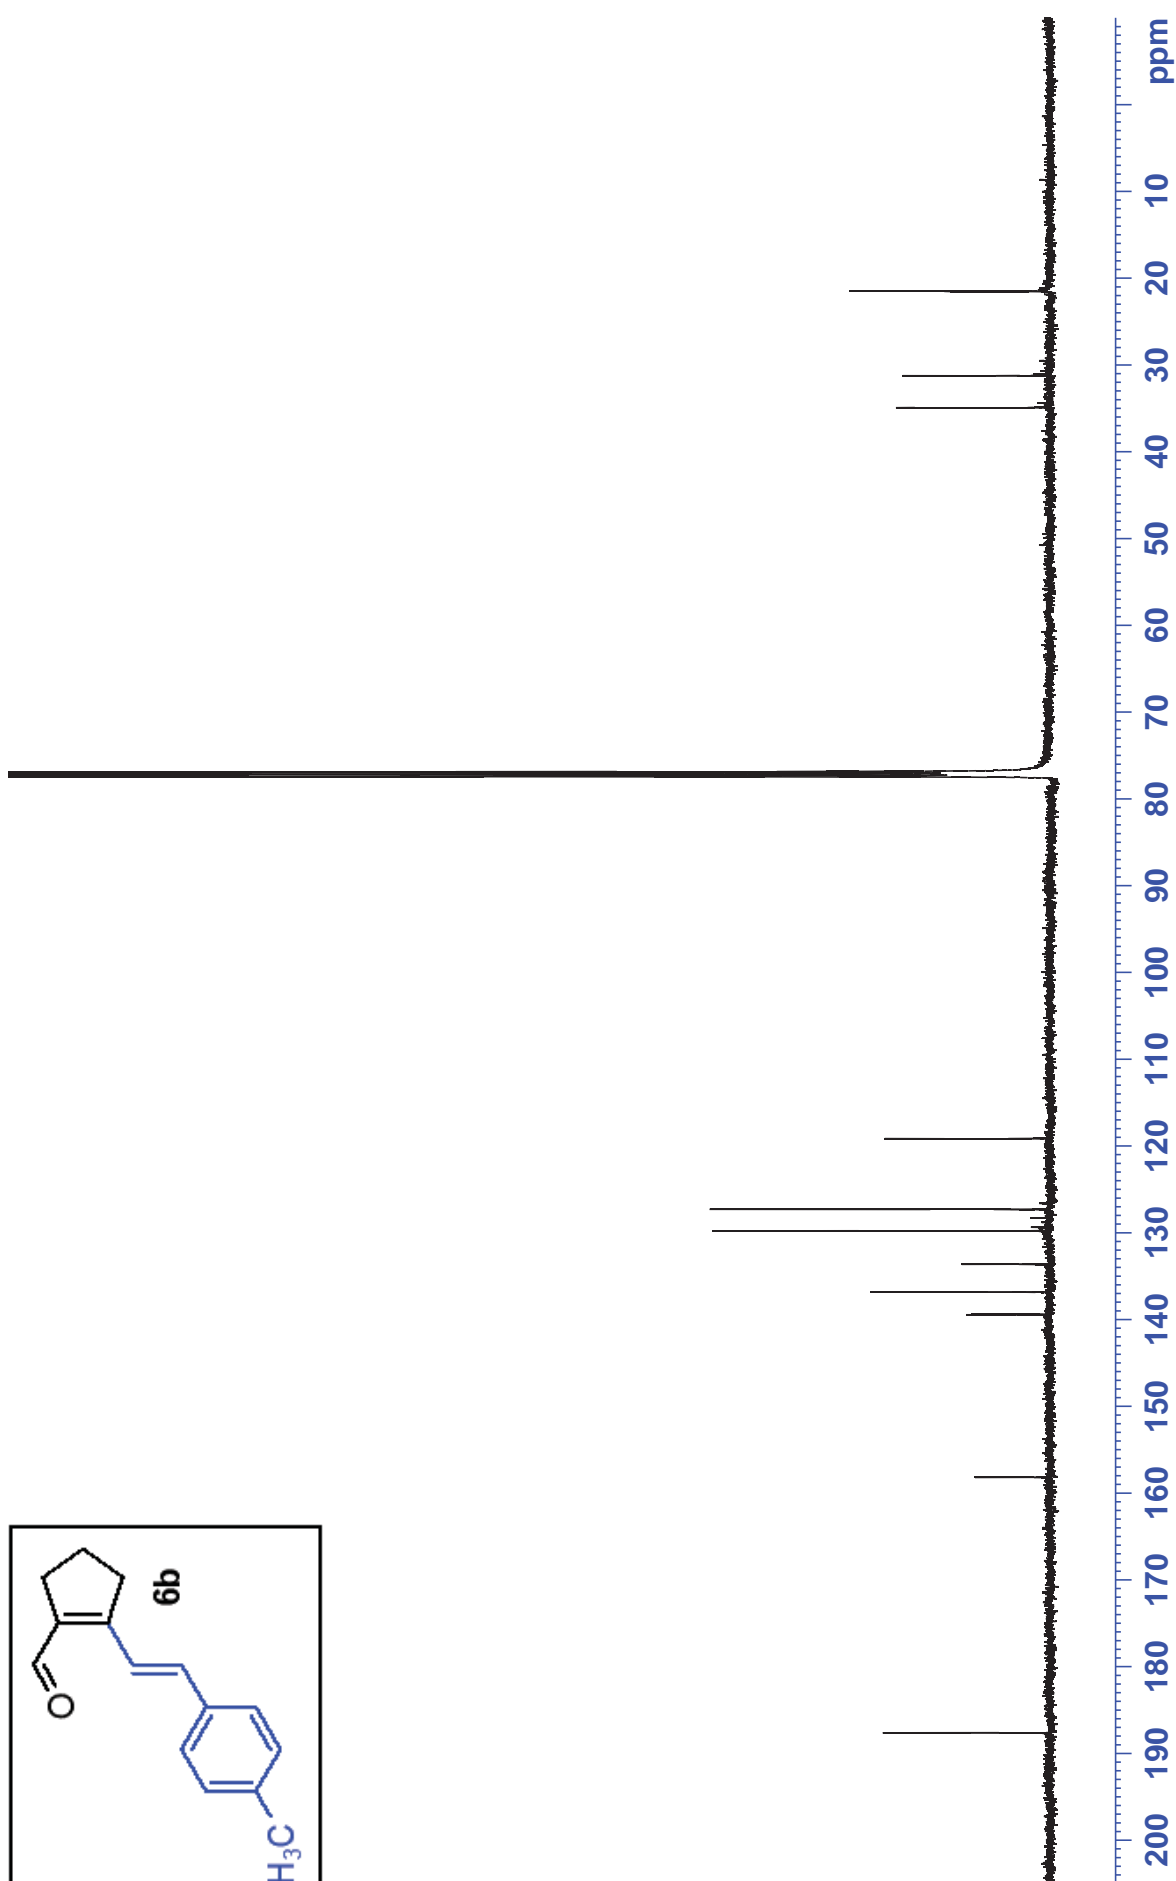



JWC-FGF23-A-79 (2)  
RCHO of MD-3-A9

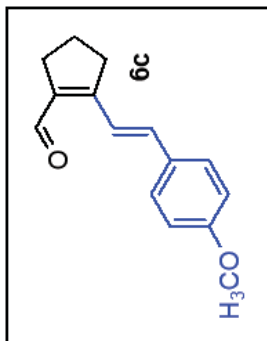

S29

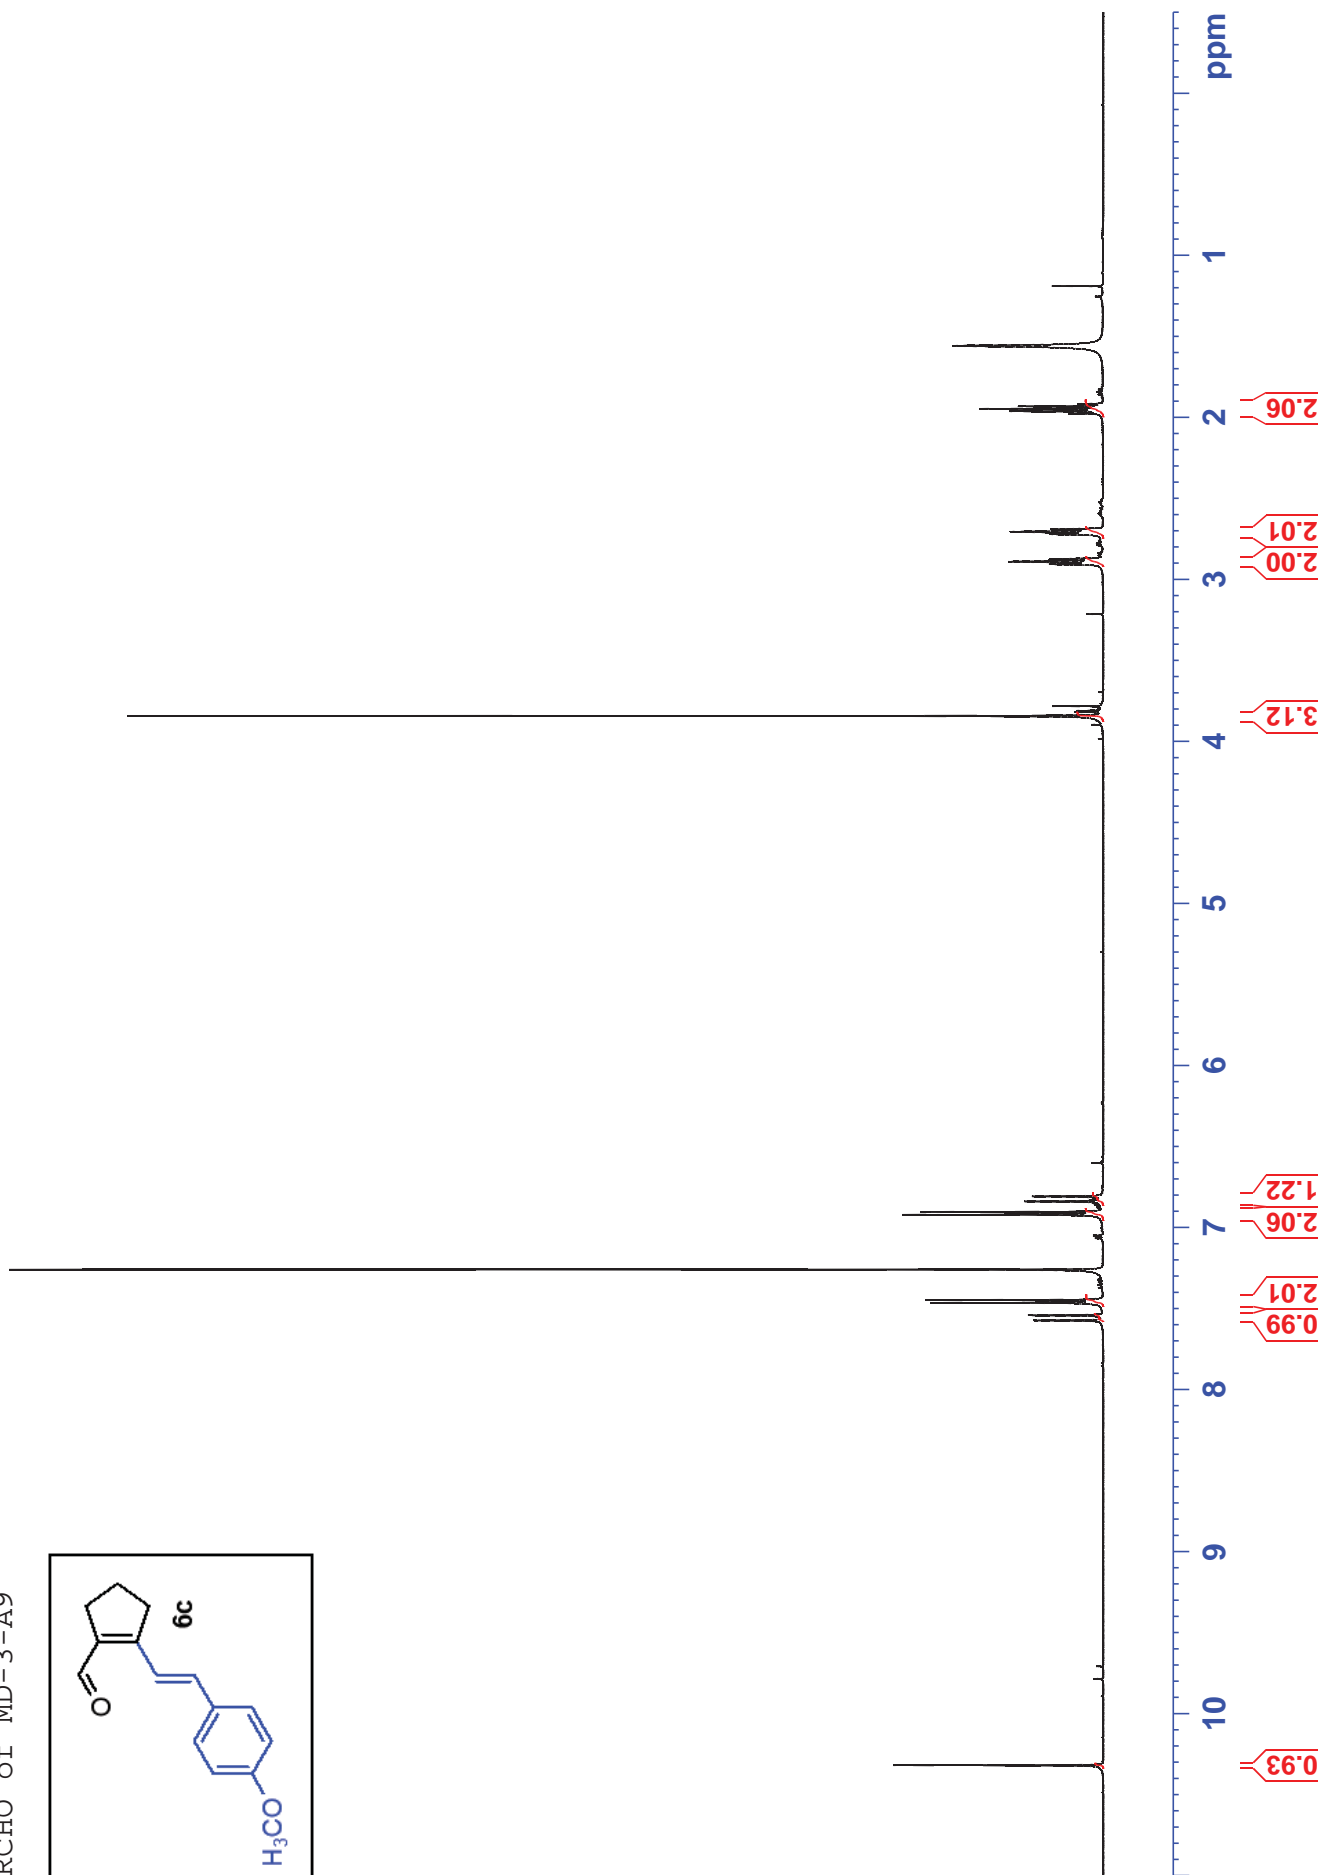

JWC-FGF23-A-75 (2)  
RCHO of MD-3-A19

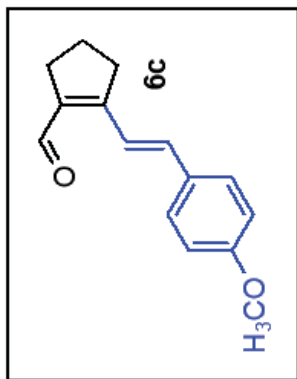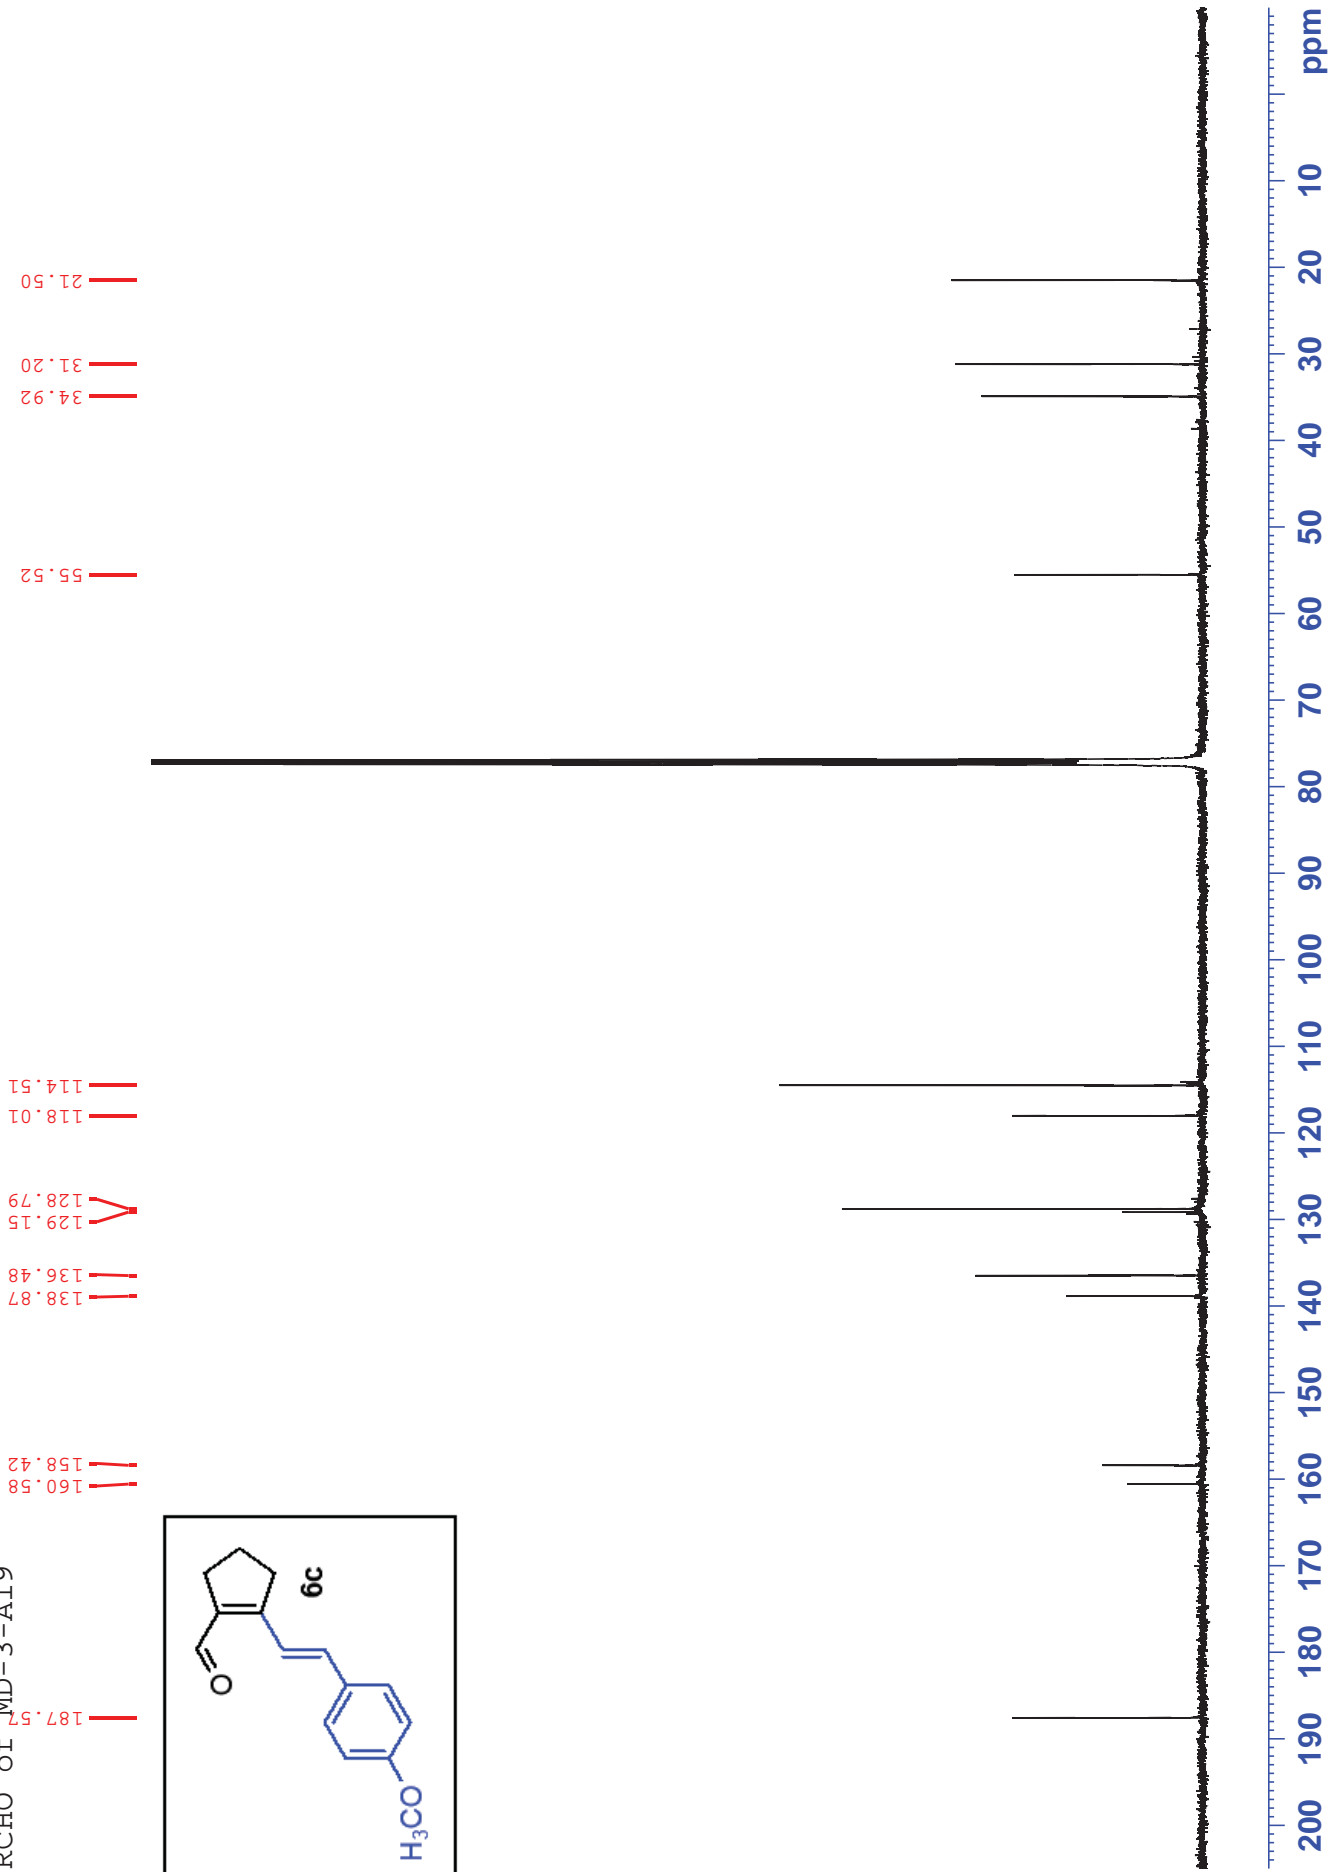

JWC-B-155 (4)  
RCHO of MD-3-A6

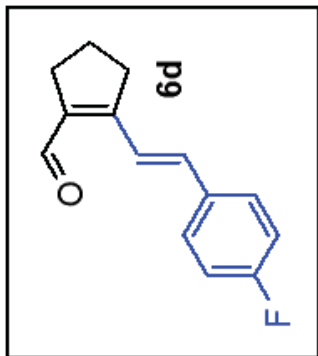

S31

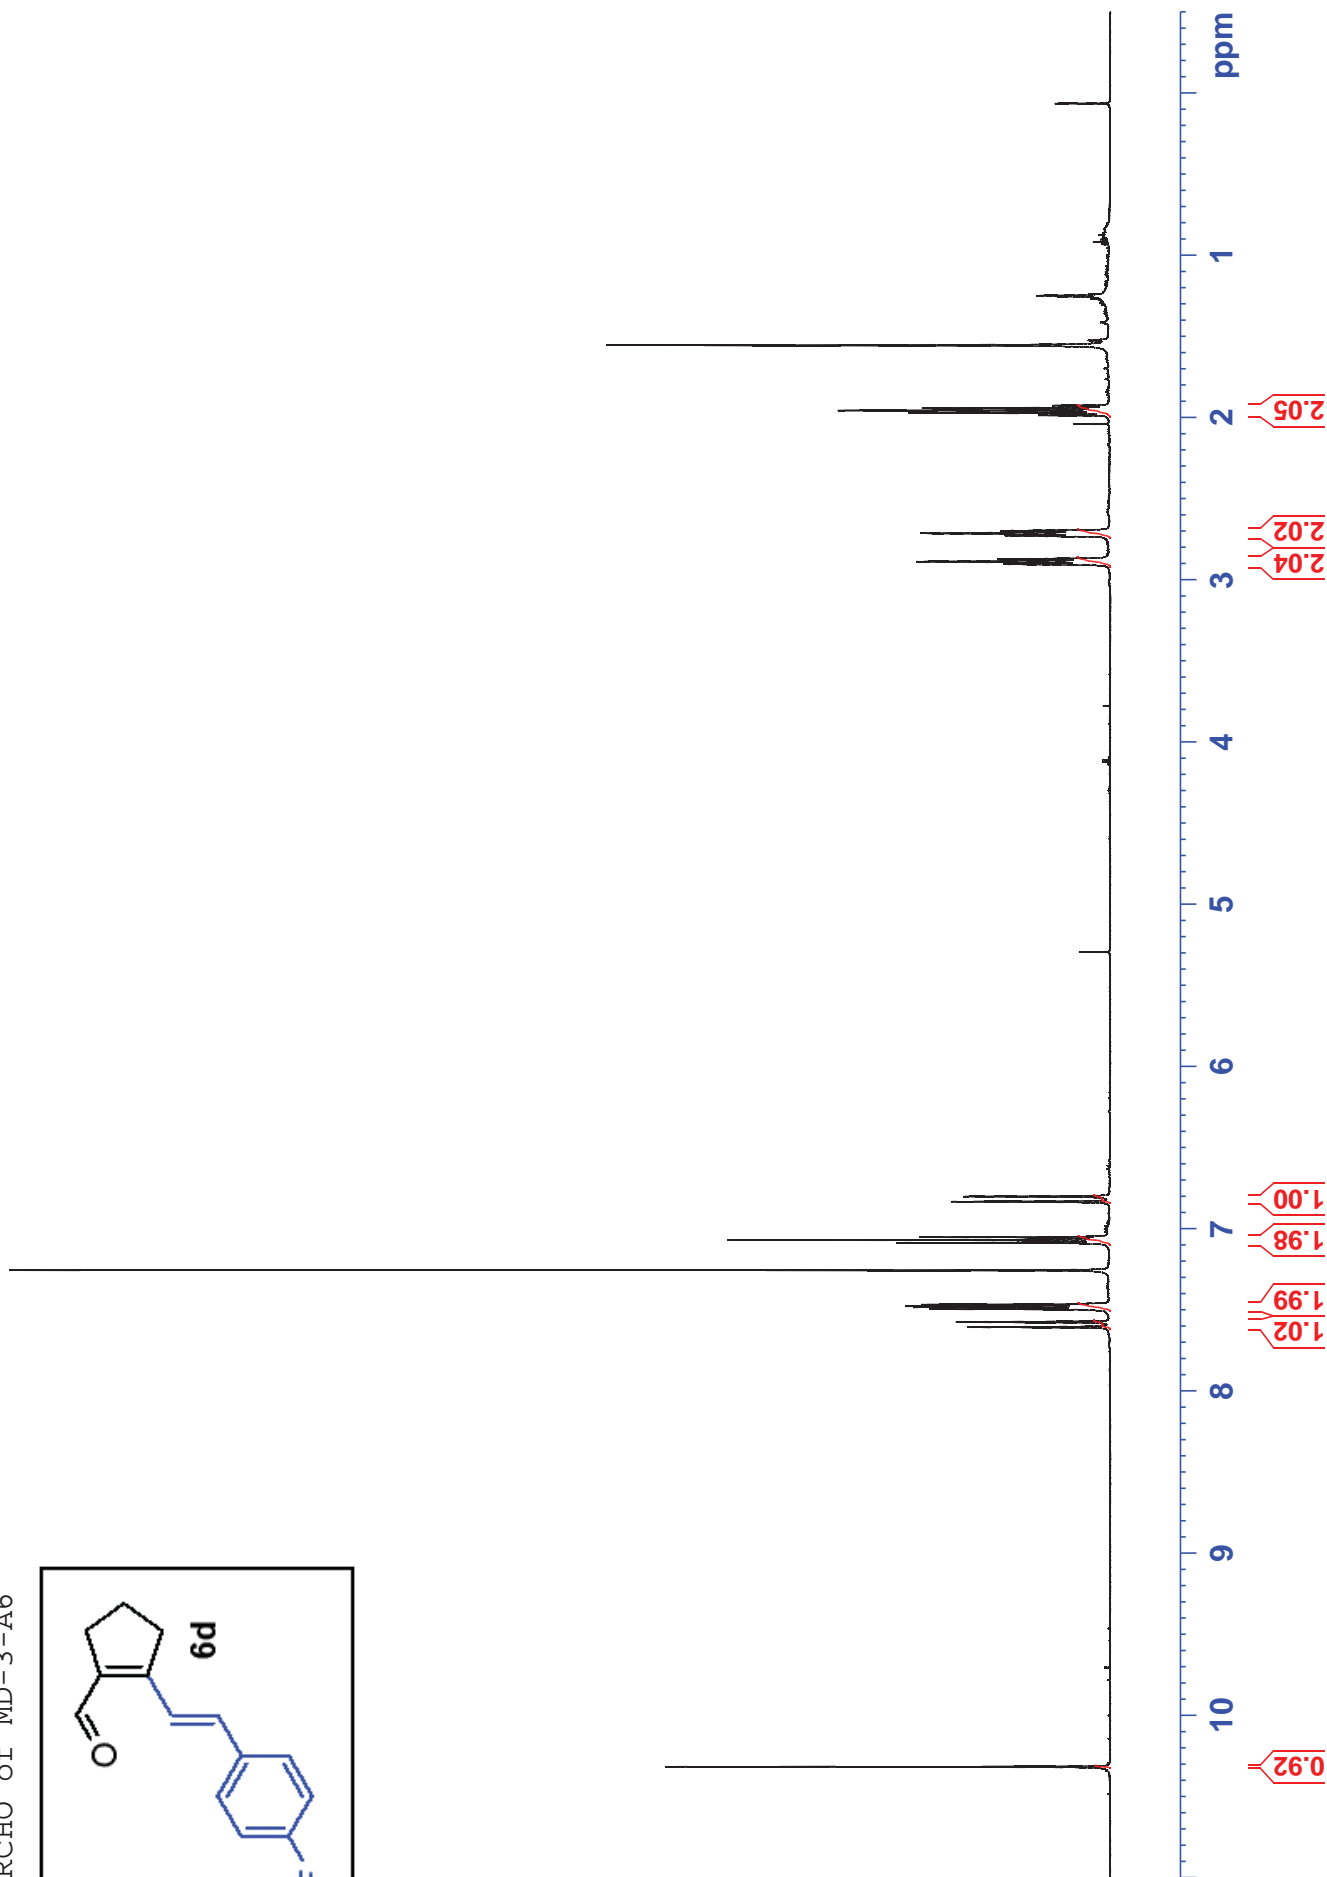

JWC-B-155 (2)  
RCHO of MD-3-A6

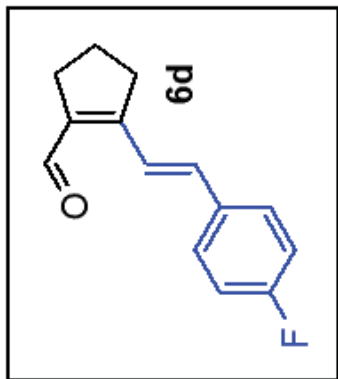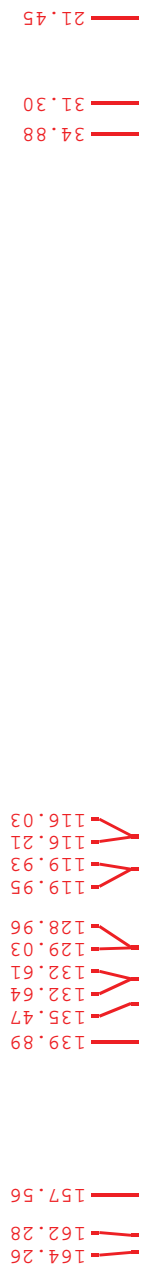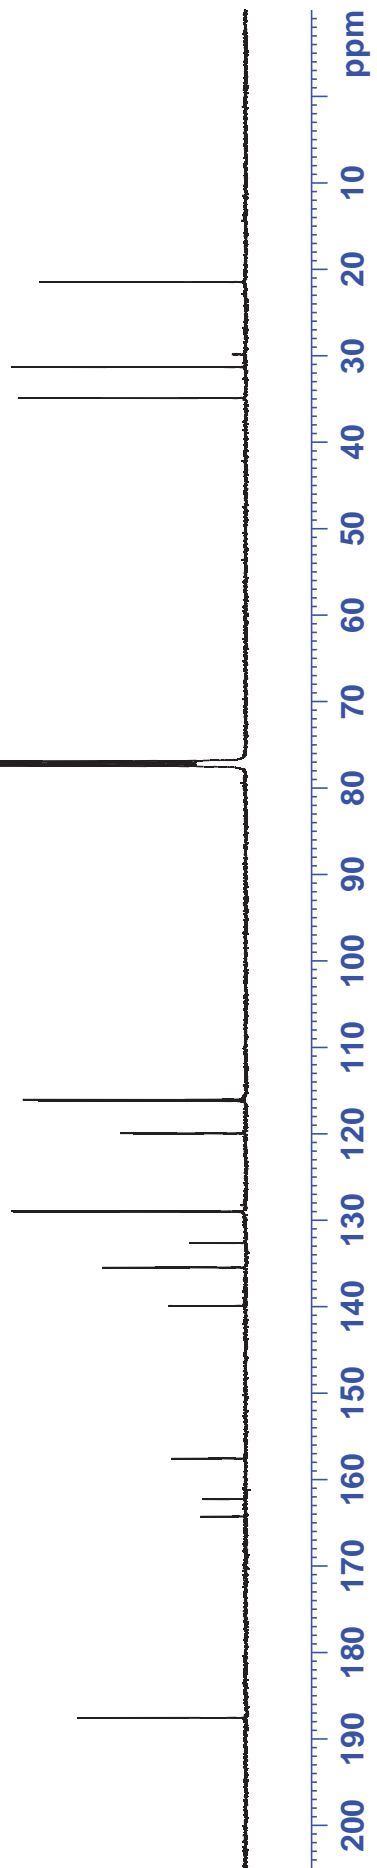

RPD-FGF23-A-17 (2)  
RCHO of MD-3-A7

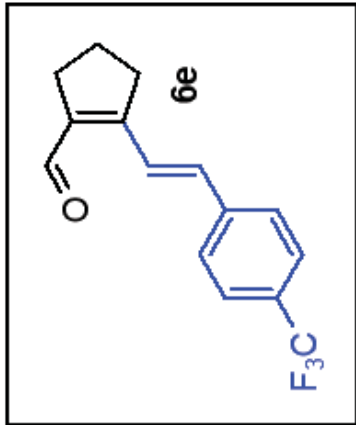

S33

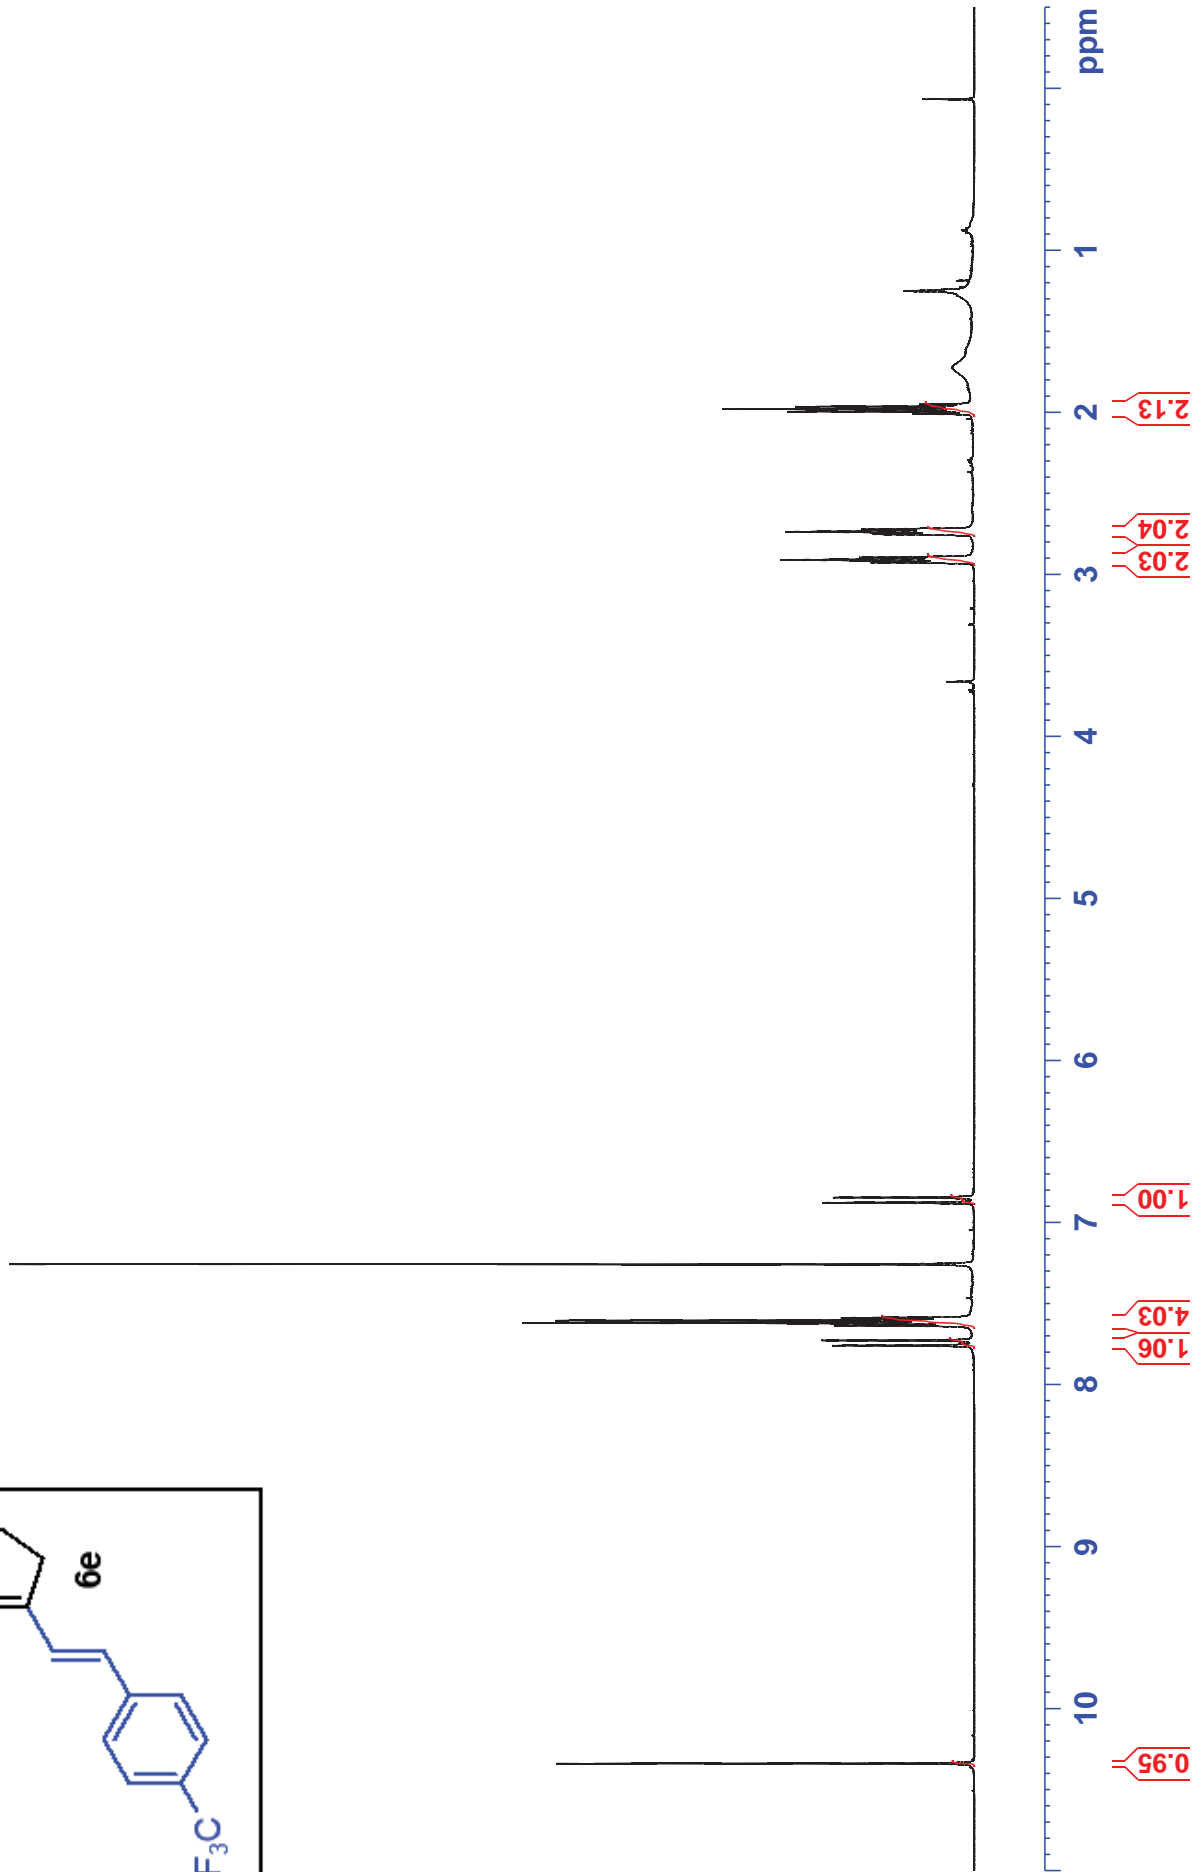

RPD-FGF23-A-17 (2)  
RCHO of MD-3-A7

187.41

156.60

141.04

139.70

134.75

130.54

127.29

125.86

122.37

21.31

31.32

34.71

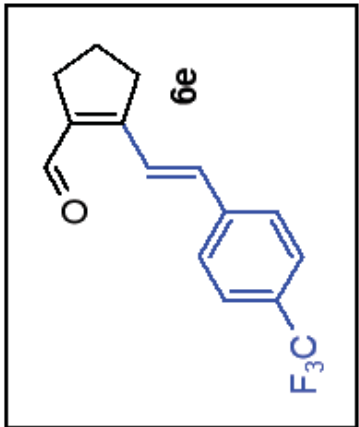

S34

200 190 180 170 160 150 140 130 120 110 100 90 80 70 60 50 40 30 20 10 0 ppm

JWC-B-153(2)  
RCHO of MD-3-A4

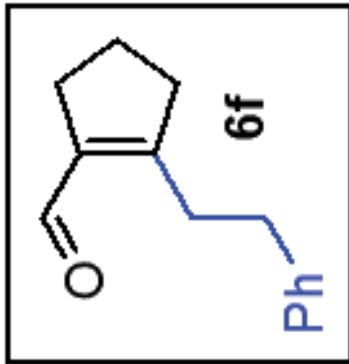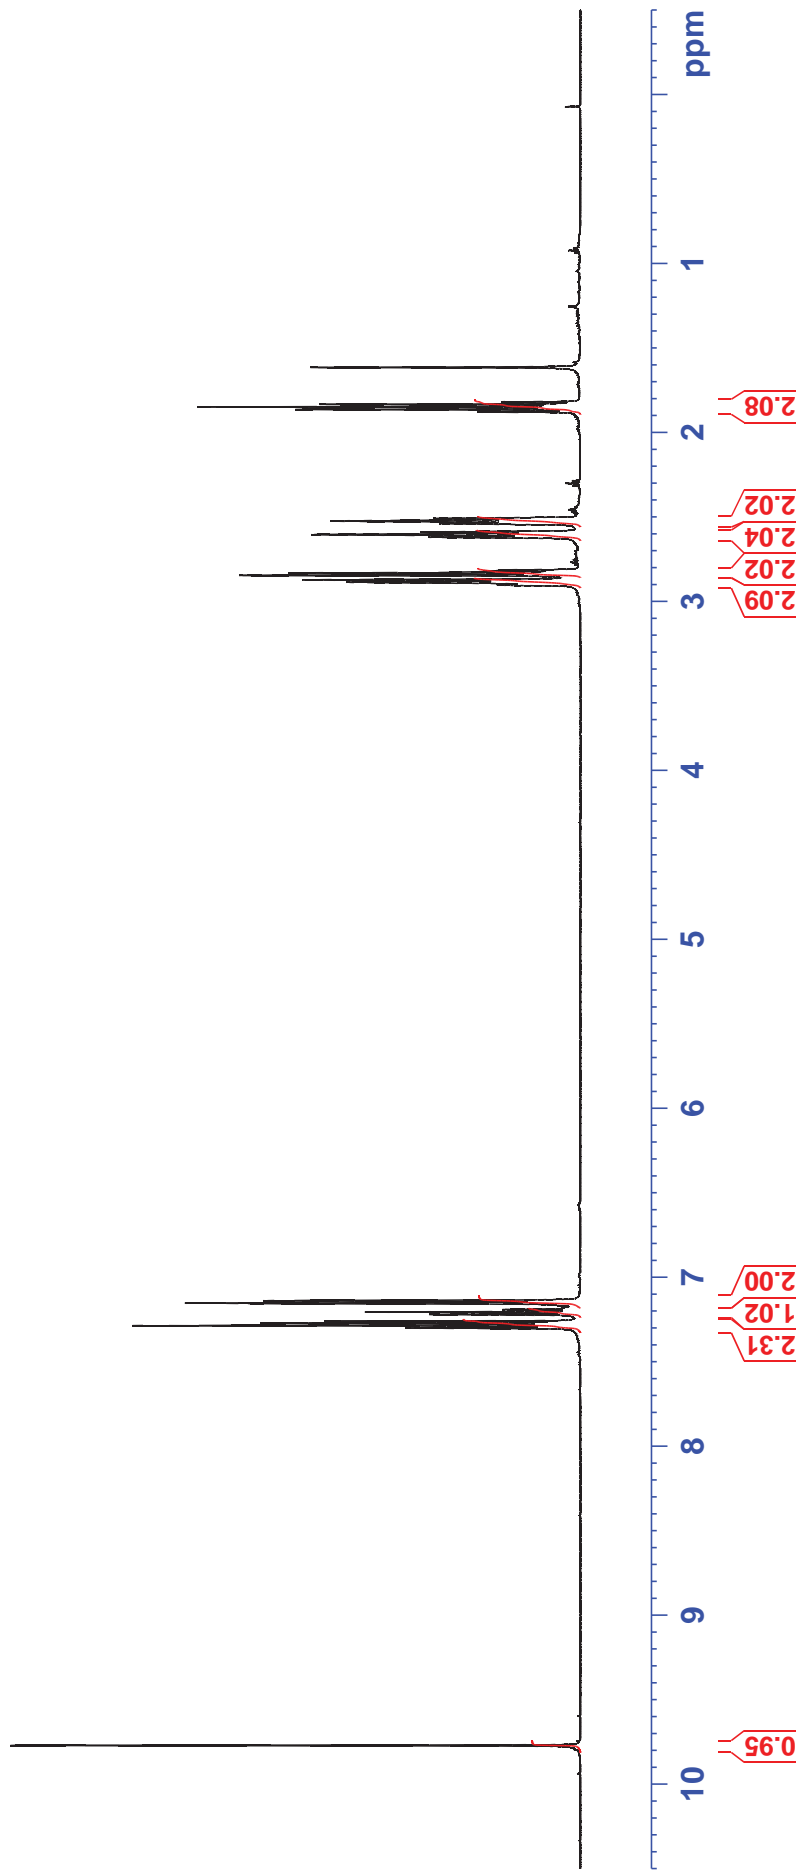

JWC-B-153(2)  
RCHO of MD-3-A4

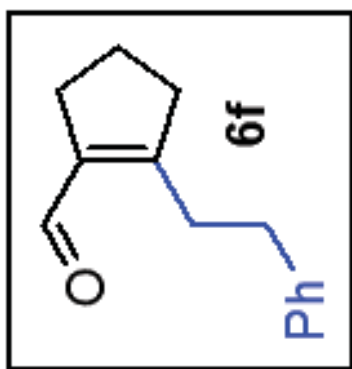

38.59  
34.80  
30.56  
30.32  
21.55

140.64  
139.13  
128.69  
128.41  
126.55

188.00  
164.92

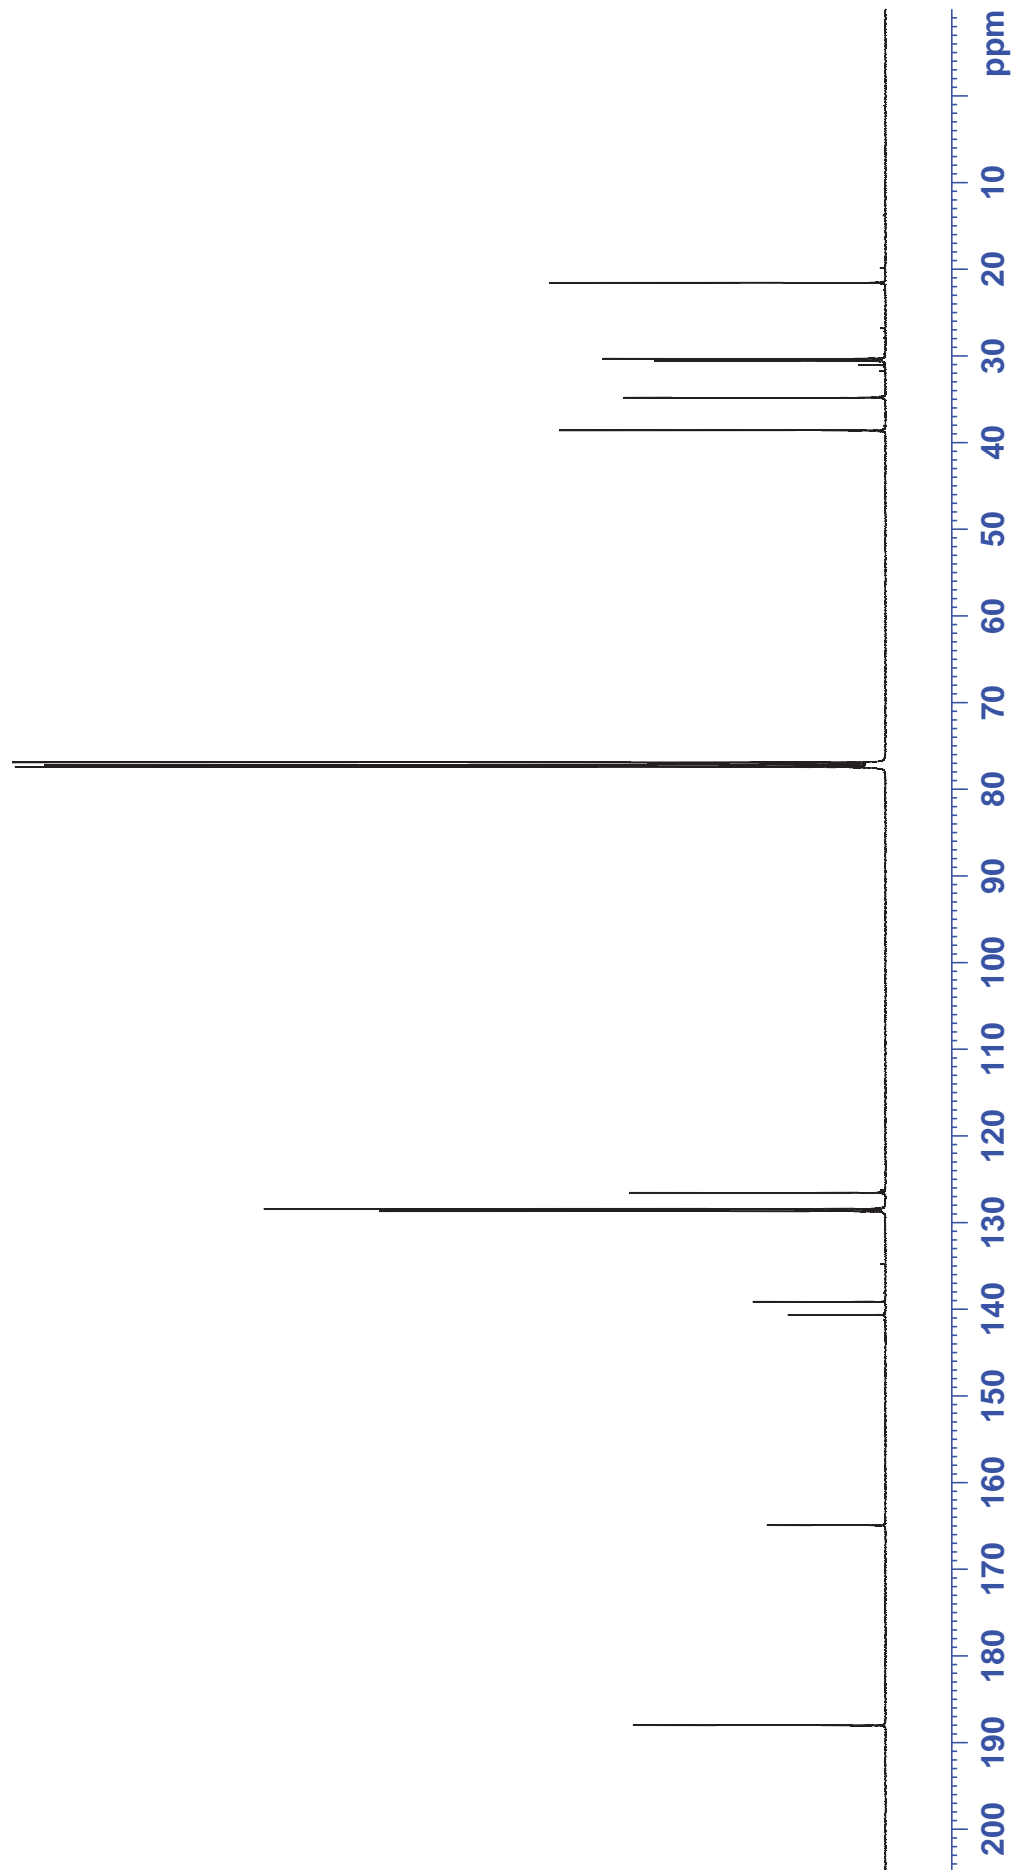



MOI-FGF23-A-99(4)  
RCHO of MD-3-A29

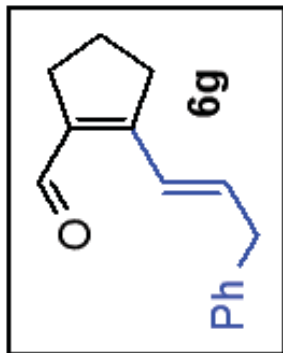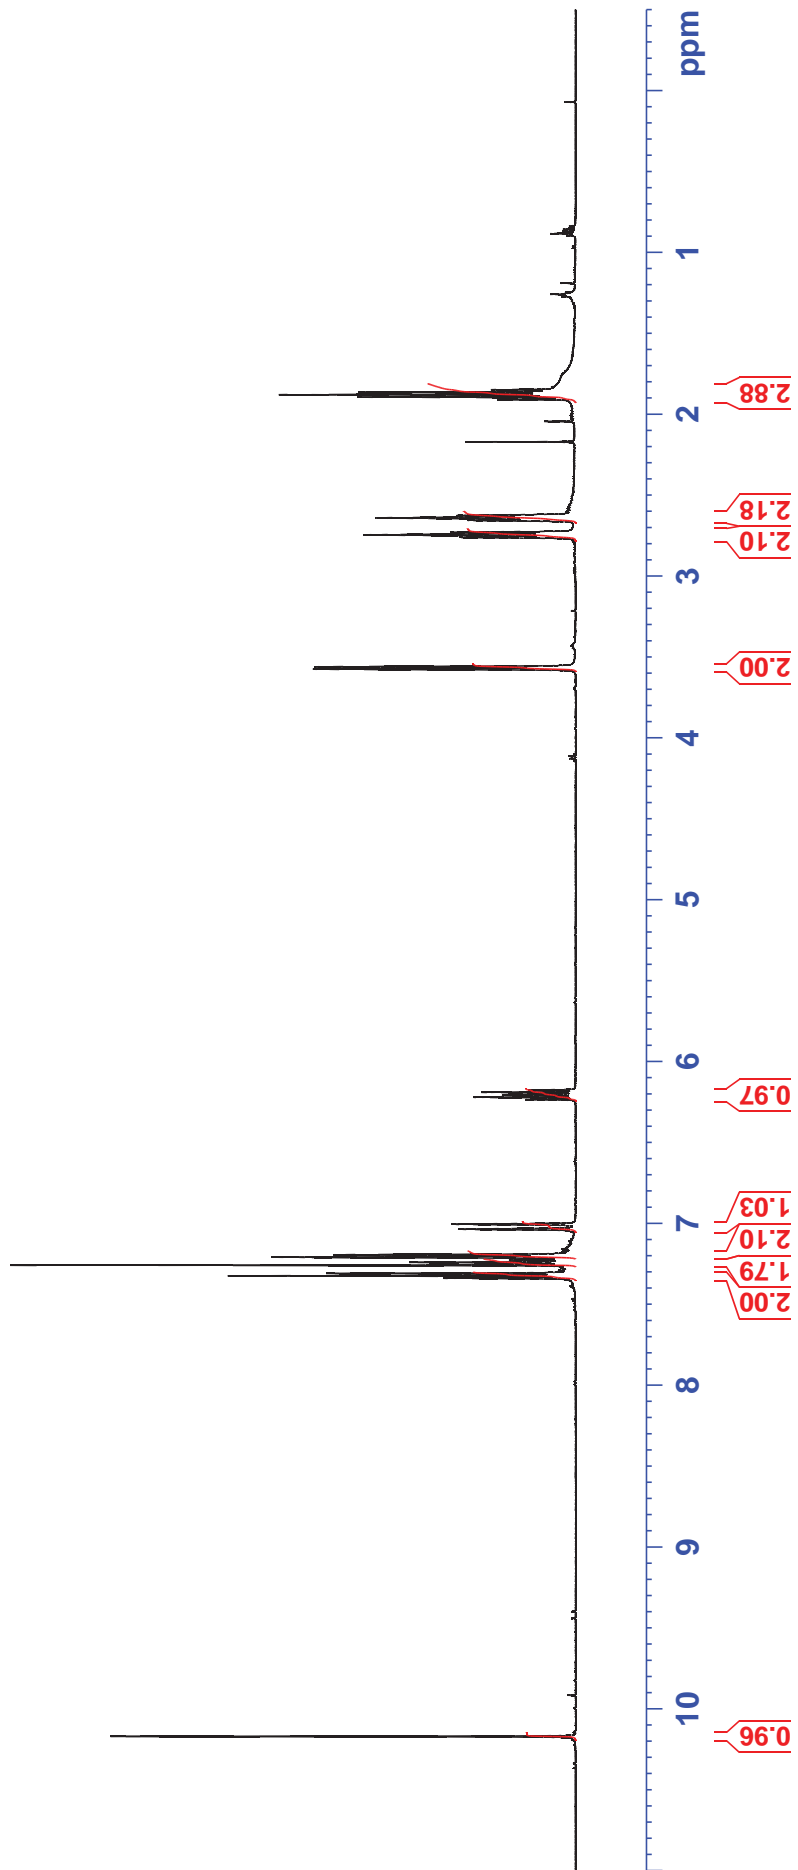

MOI-FGF23-A-99(4)  
RCHO of MD-3-A29

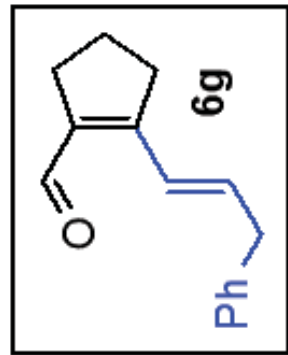

21.35  
30.93  
35.03  
39.83

123.39  
126.68  
128.80  
128.81  
138.56  
138.65  
139.06

158.13

187.84

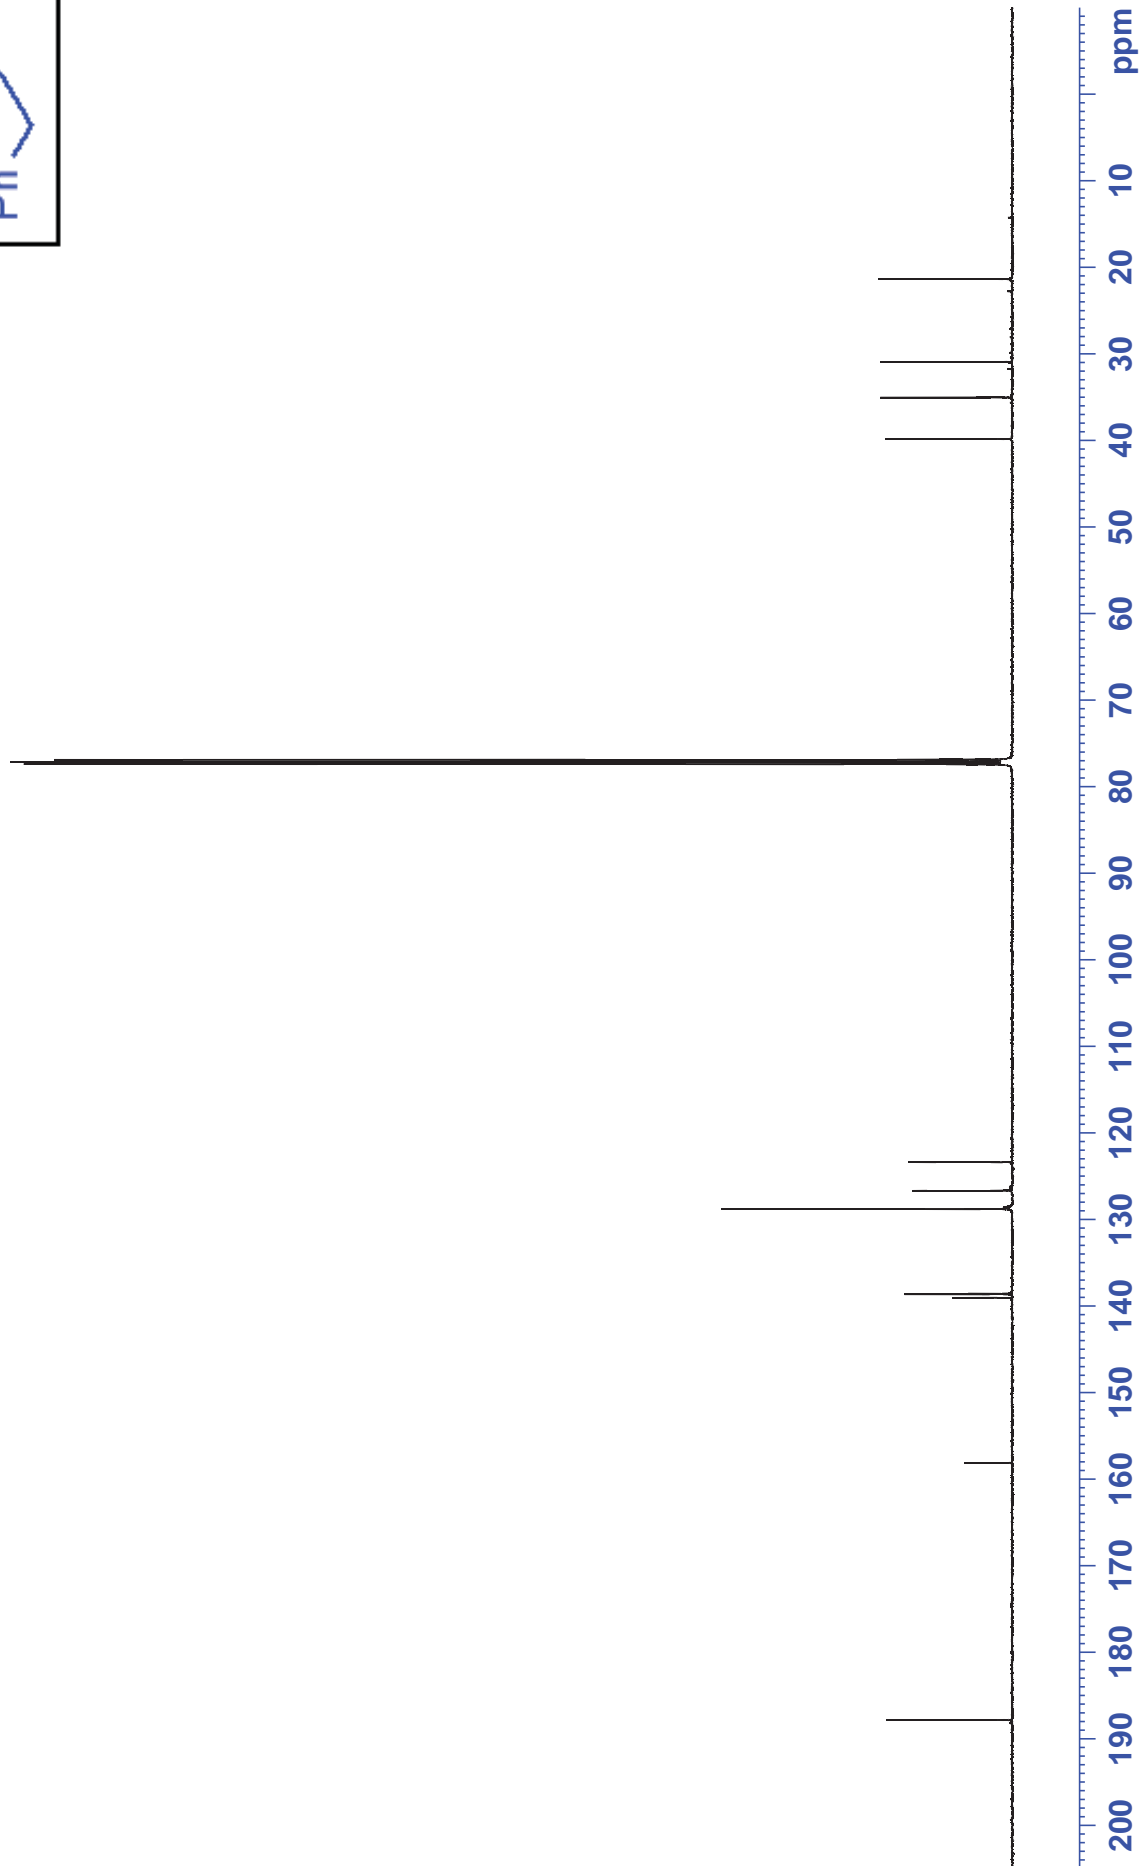

RPD-FGF23-A-47 (3)  
RCHO of MD-3-A13

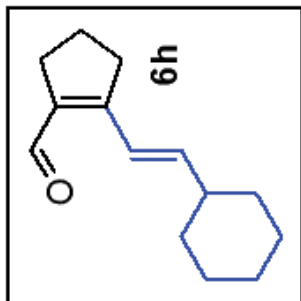

S39

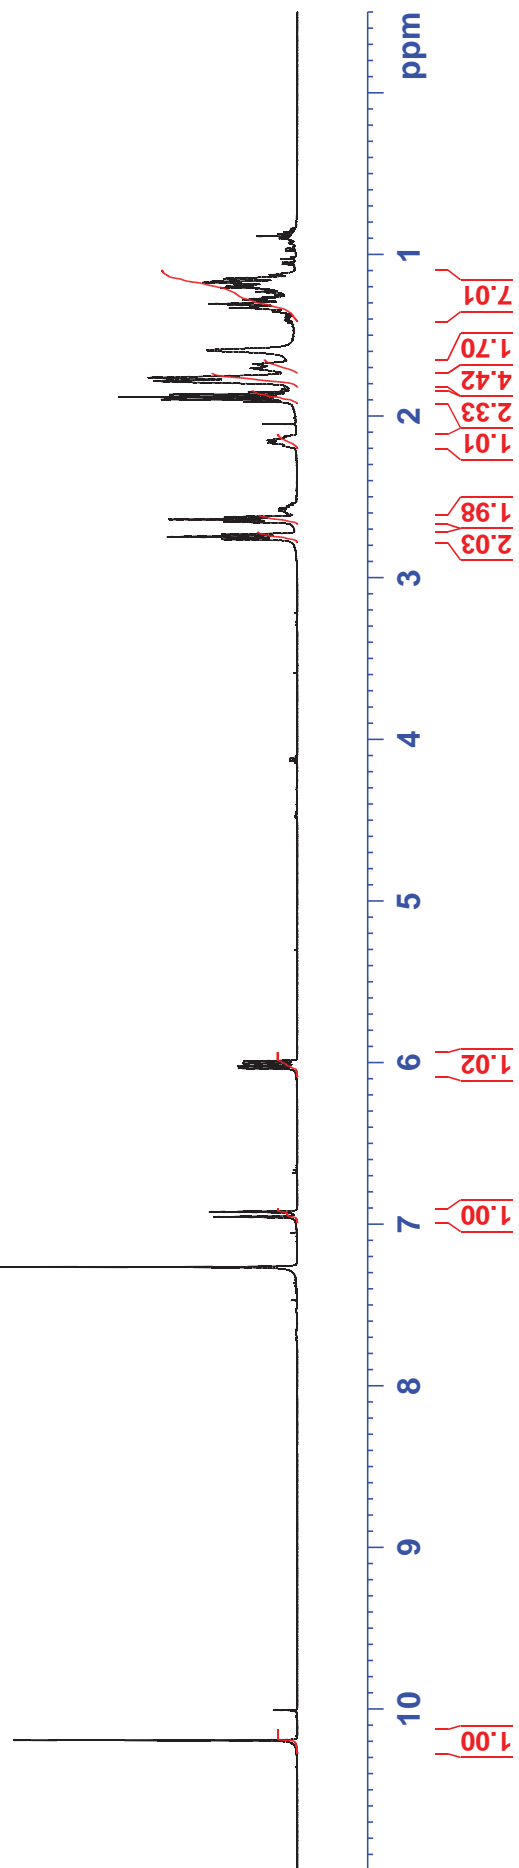

RPD-FGF23-A-133(2)  
RCHO of MD-3-A13

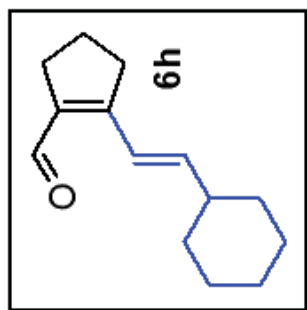

41.77  
35.05  
32.67  
30.93  
26.13  
25.97  
21.39

187.89  
159.07  
146.27  
137.93  
119.96

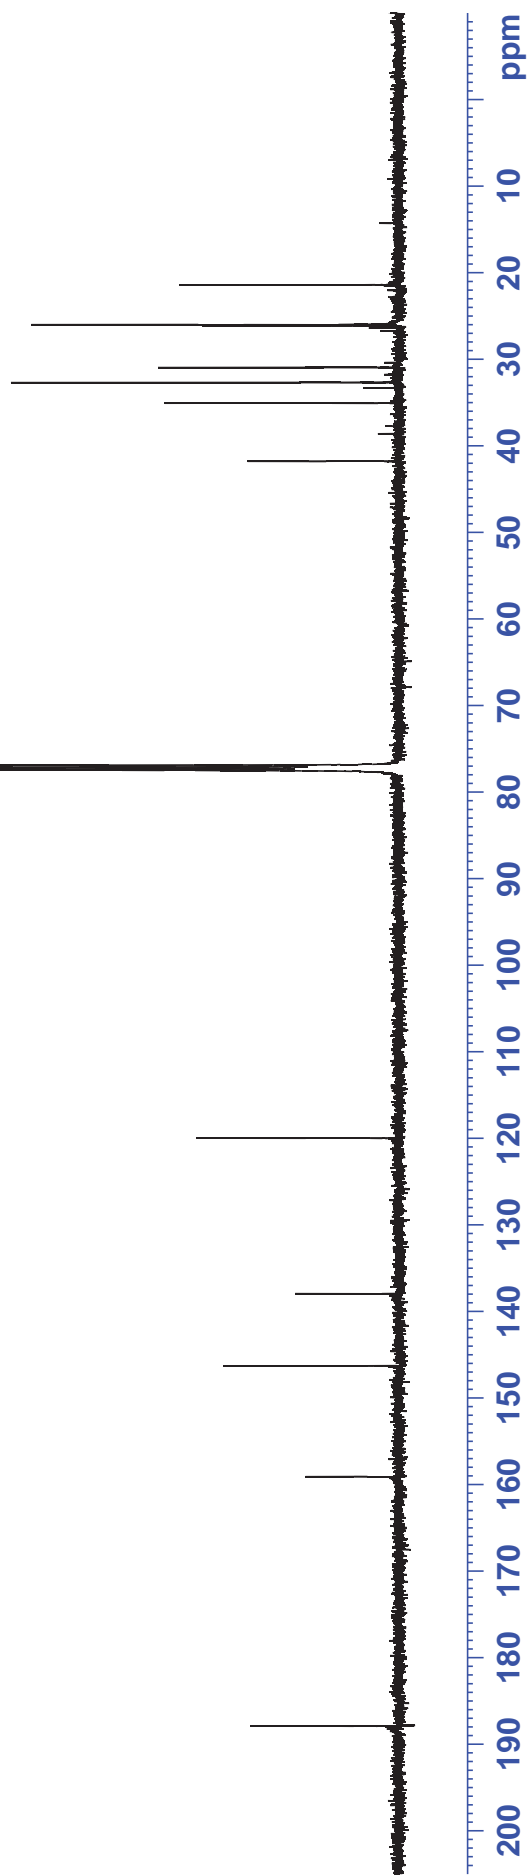

RPD-FGF23-A-129 (4)  
RCHO of MD-3-A21

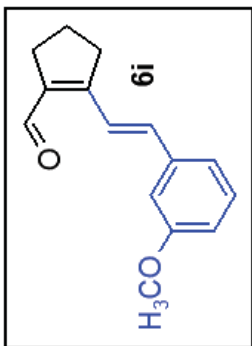

S41

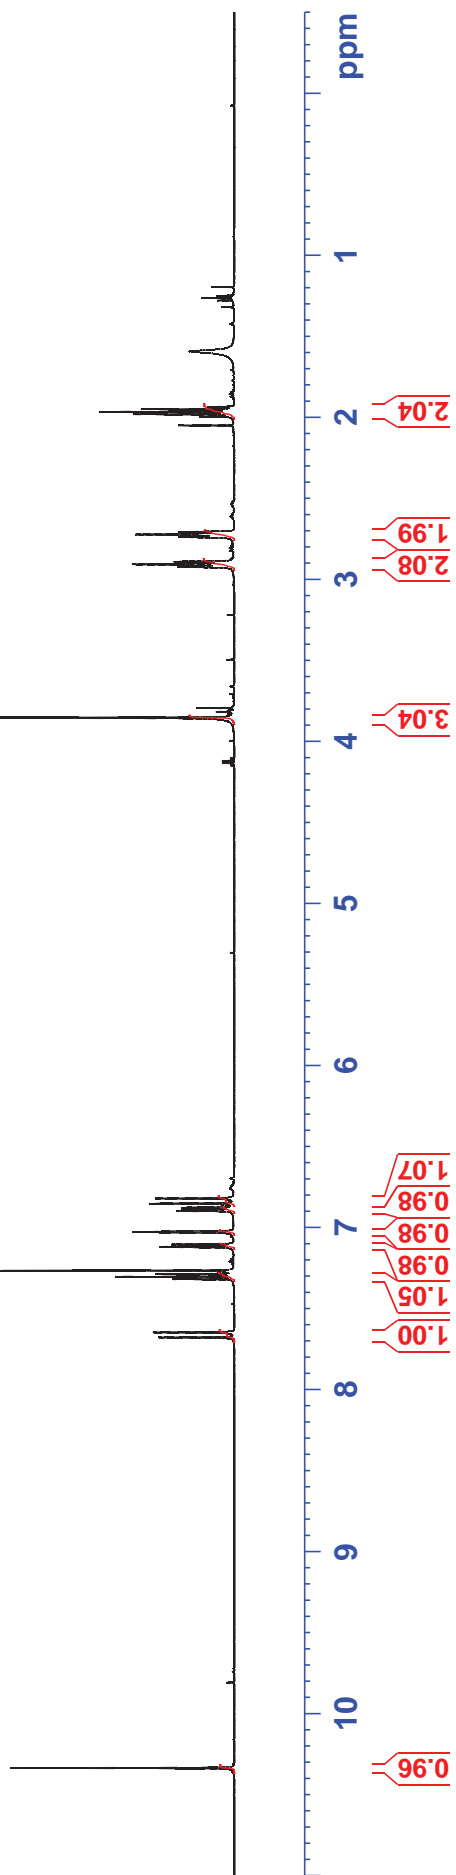

RPD-FGF23-A-127(4)  
RCHO of MD-3-A21

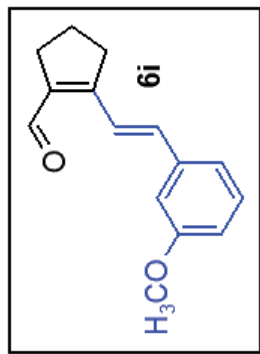

- 187.60
- 160.10
- 157.74
- 139.99
- 137.80
- 136.67
- 130.00
- 120.40
- 119.99
- 114.77
- 112.58
- 55.46
- 34.90
- 31.28
- 21.44

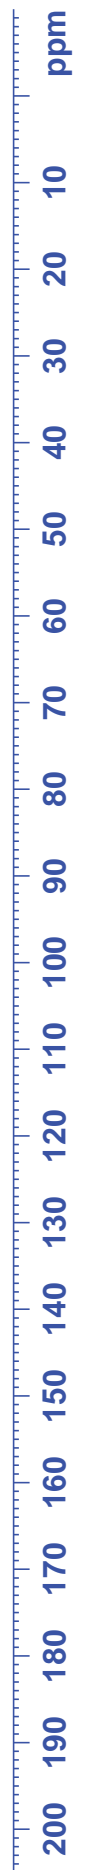

RPD-FGF23-A-127(5)  
RCHO of MD-3-A22

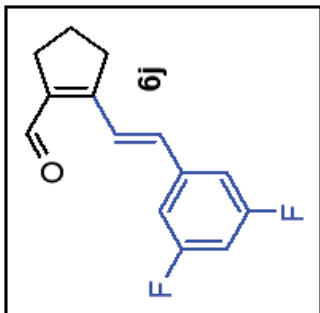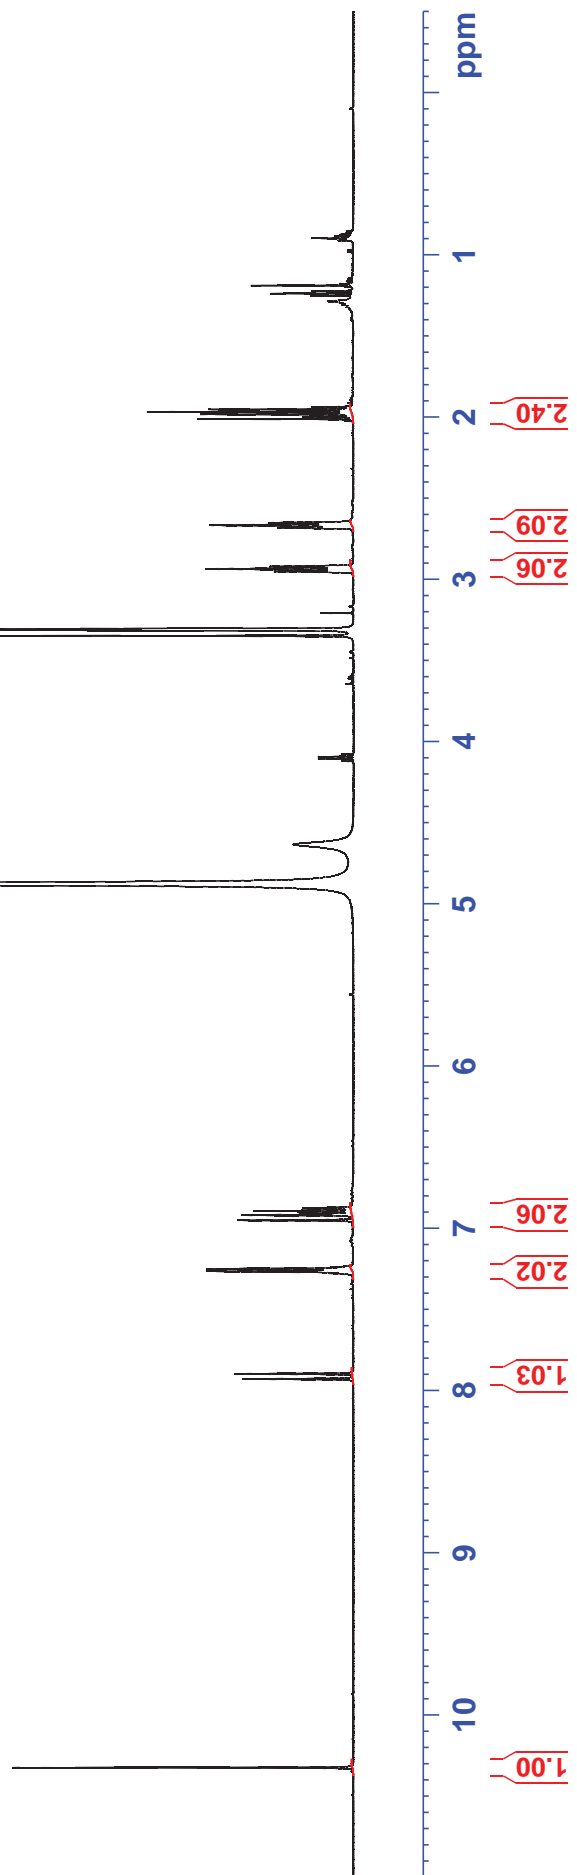

RPD-FGF23-A-127(5)  
RCHO of MD-3-A22

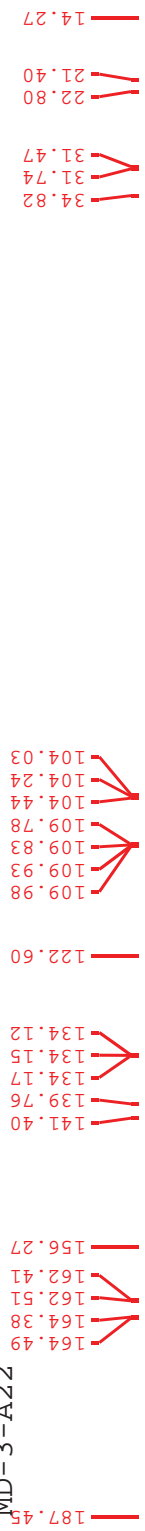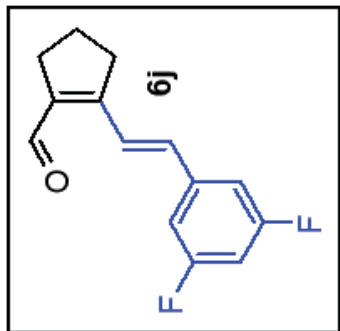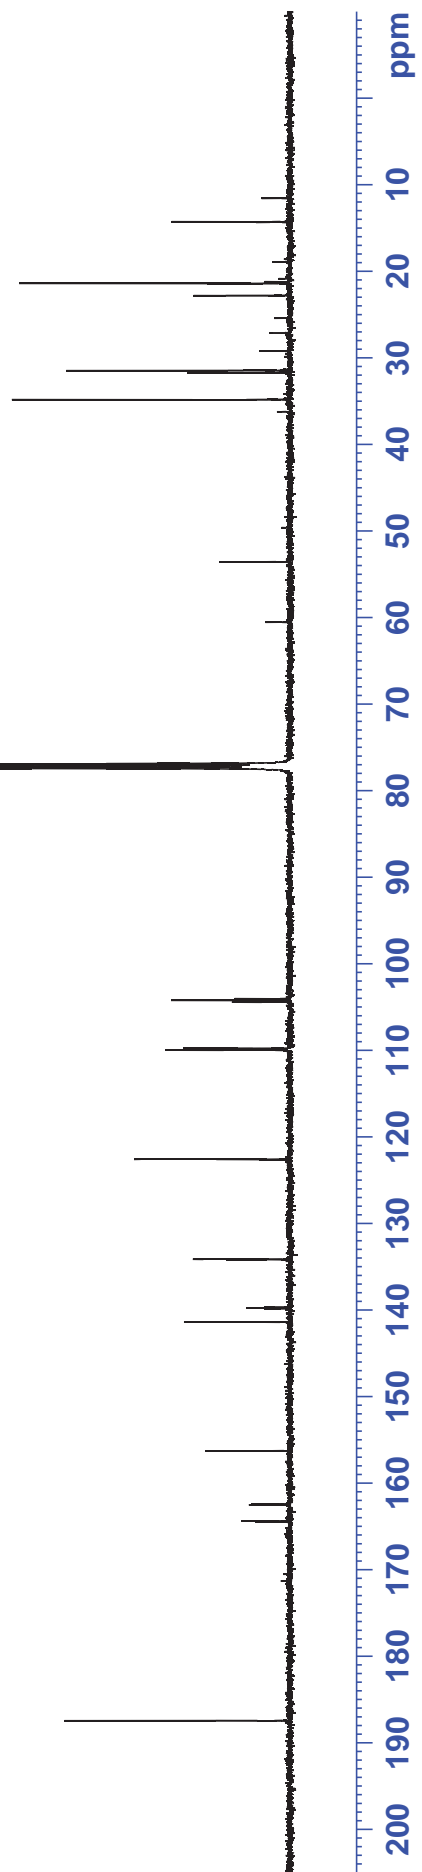



MOI-FGF23-A-95 (5)  
2-Phenyl-cyclopent-1-enecarbaldehyde

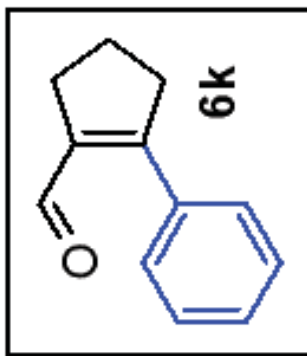

S45

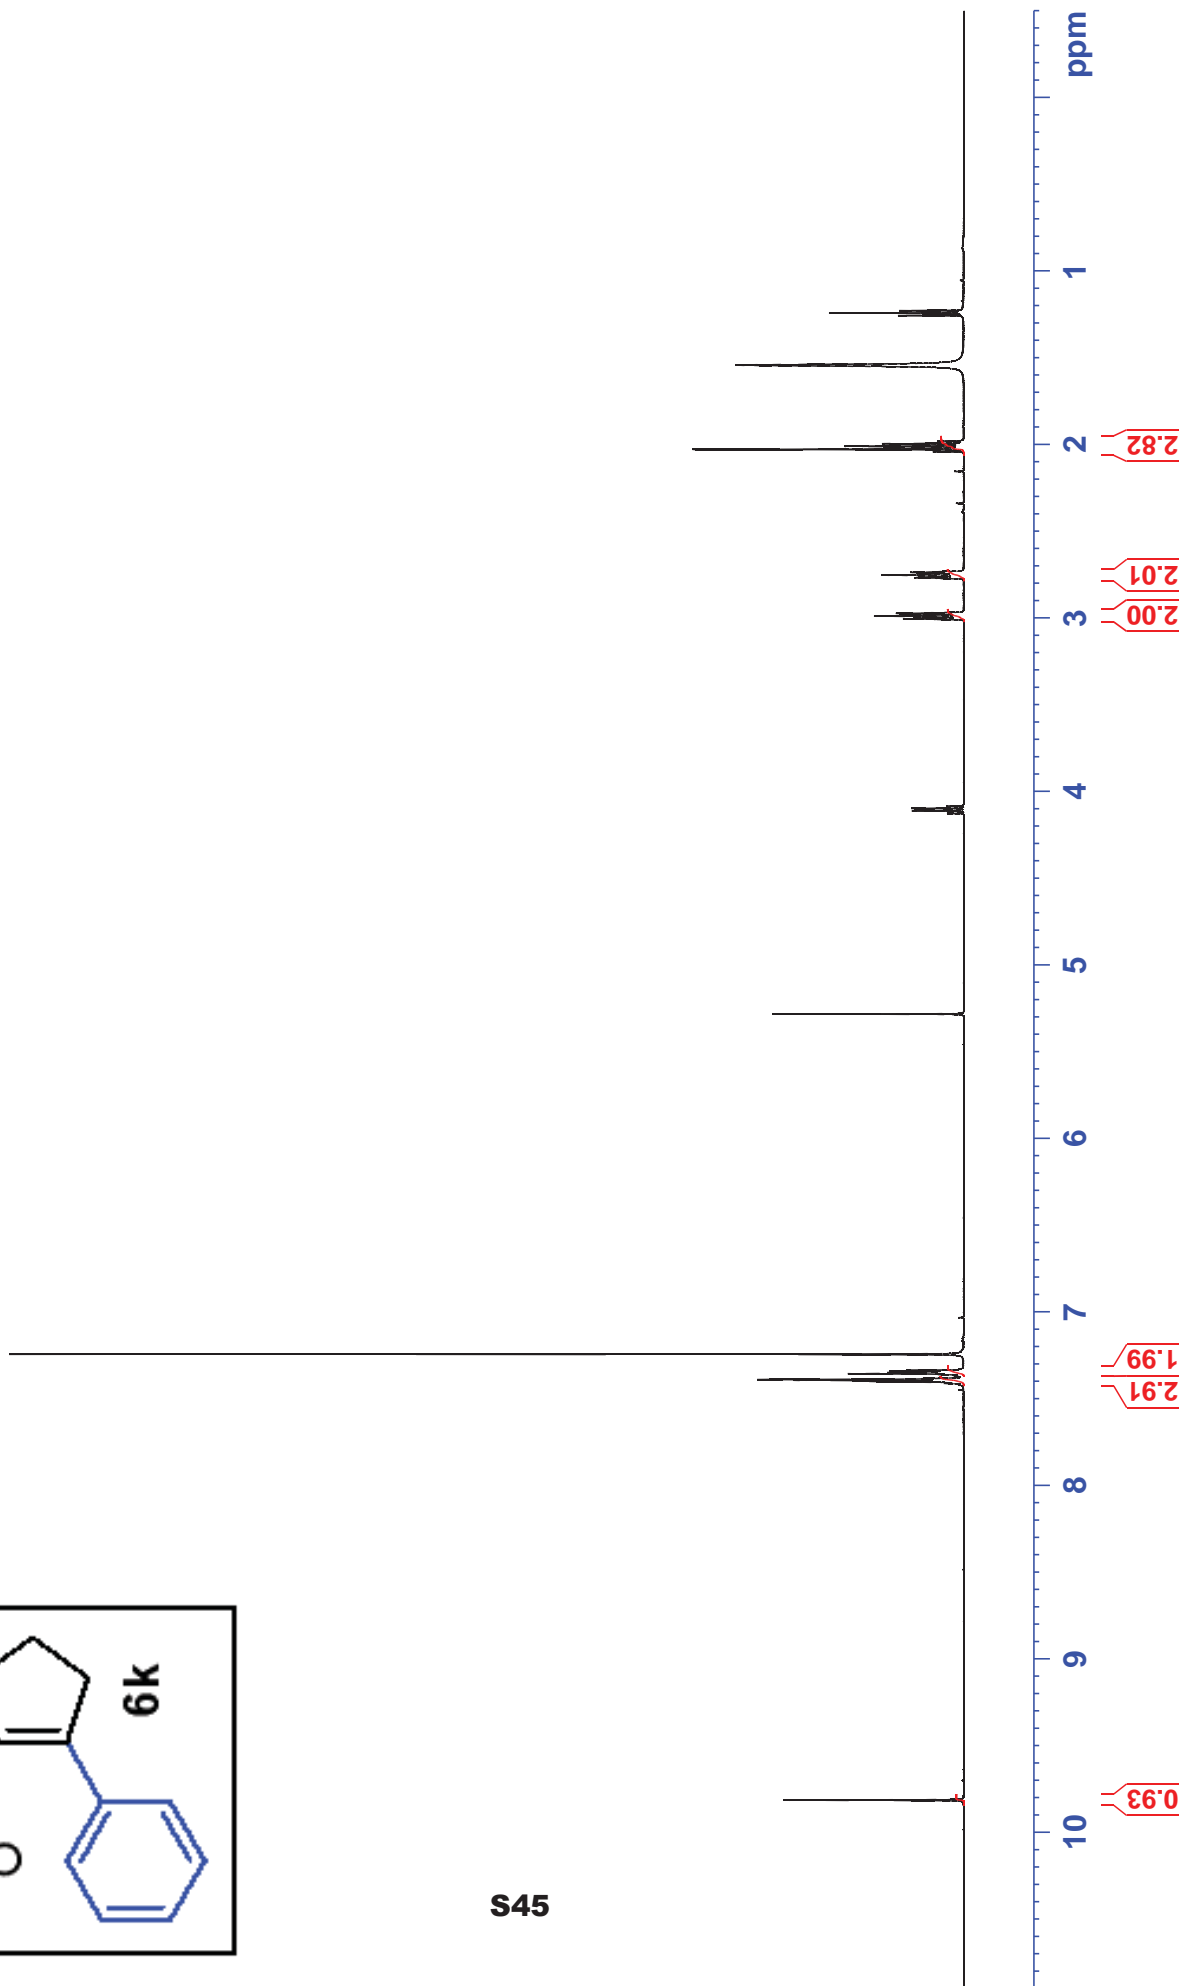

RPD-FGF23-A-81 (2)  
RCHO of MD-3-A37

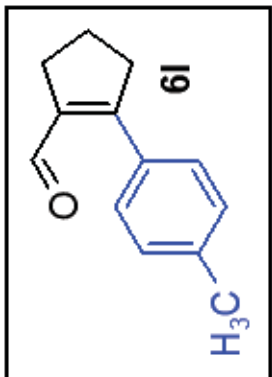

S46

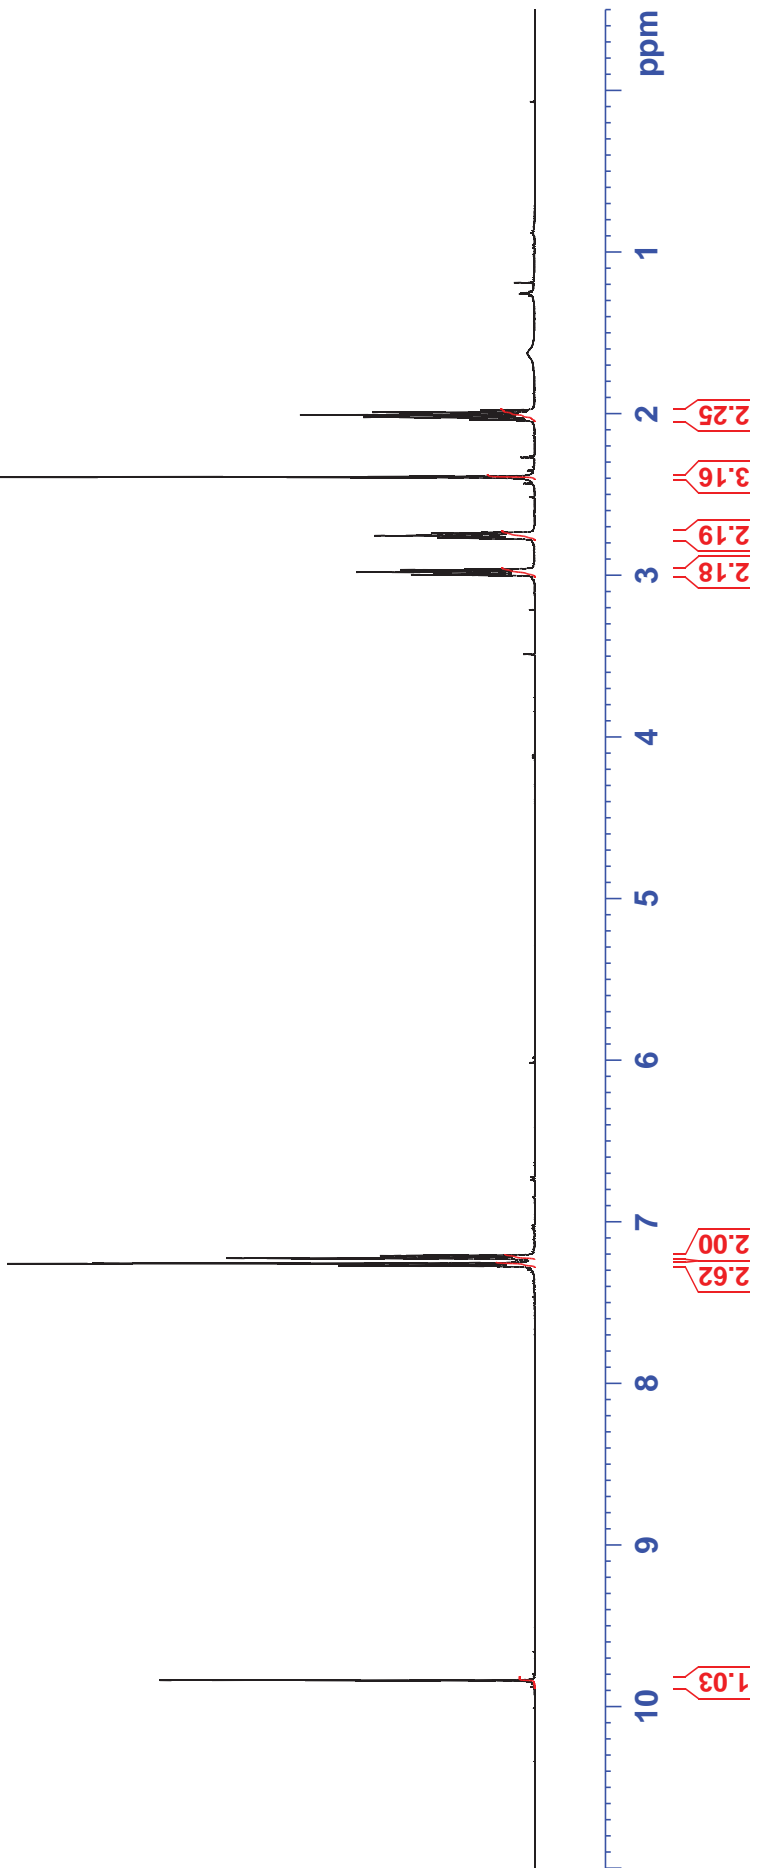

RPD-FGF23-A-81 (2)  
RCHO of MD-3-A37

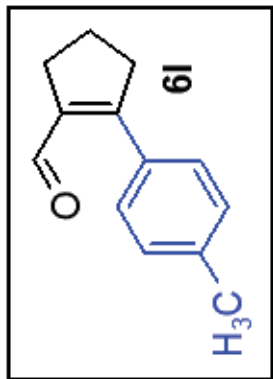

190.68

162.73

139.59

139.18

132.20

129.32

128.73

39.70

31.23

21.75

21.43

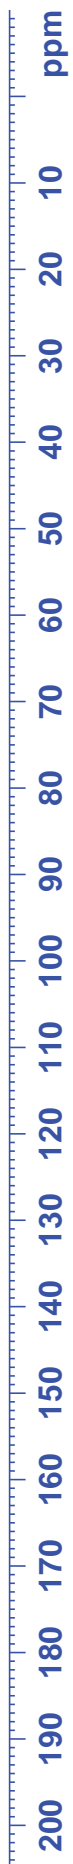

RPD-FGF23-A-89(3)  
RCHO of MD-3-A38

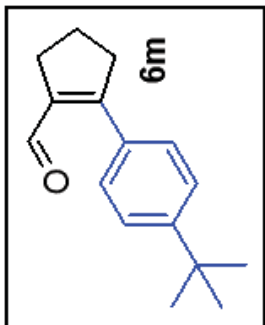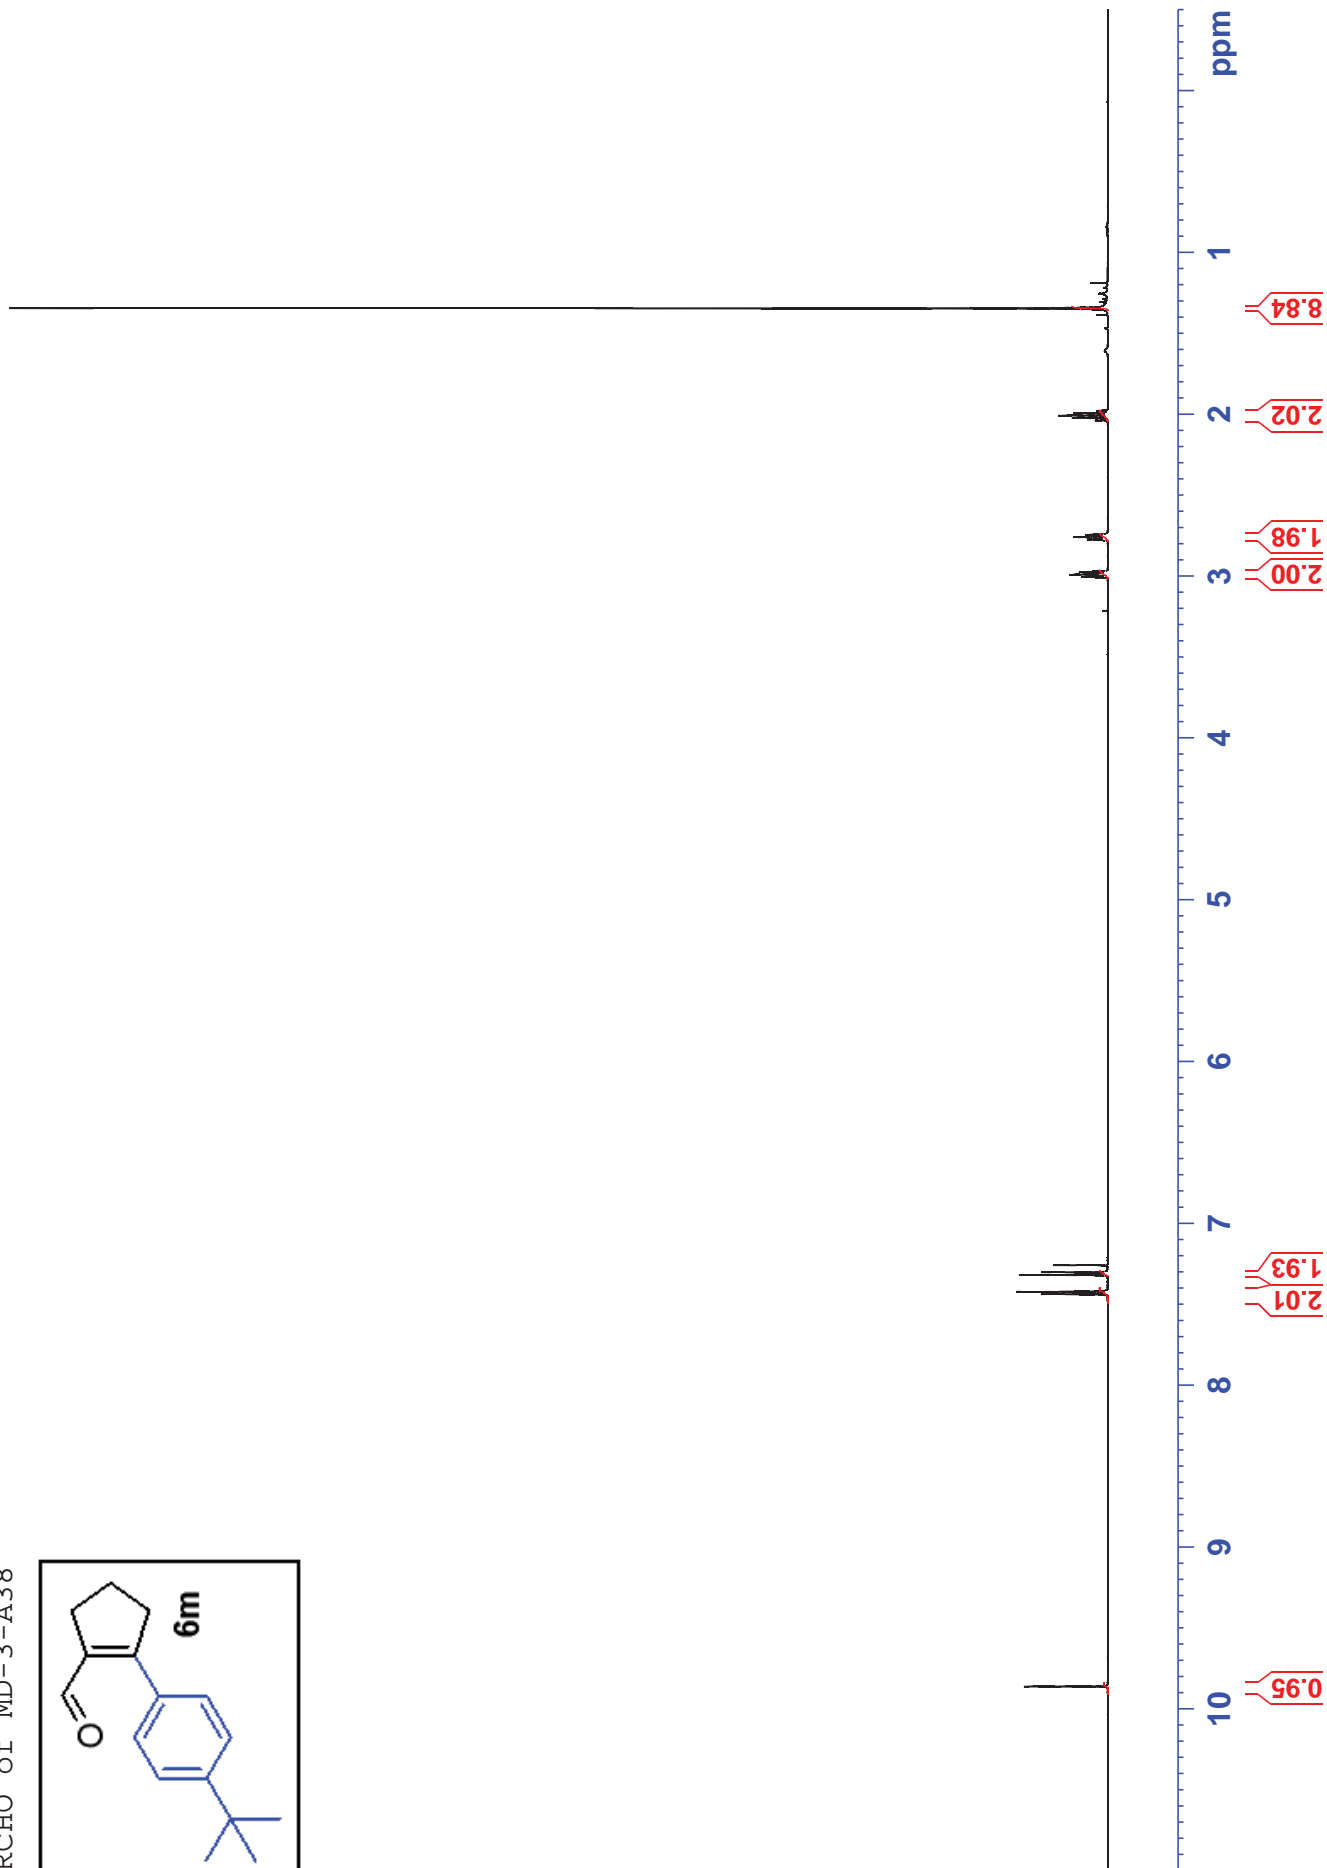

RPD-FGF23-A-97 (2)  
RCHO of MD-3-A38

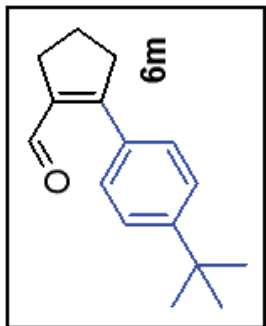

39.68  
34.91  
31.35  
31.28  
21.79

162.63  
152.76  
139.25  
132.20  
128.62  
125.57

190.73

ppm

RPD-FGF23-A-77 (4)  
RCHO of MD-3-A36

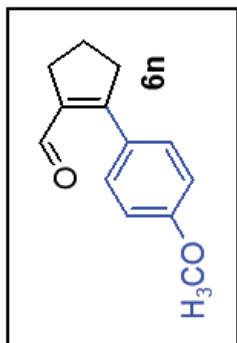

S50

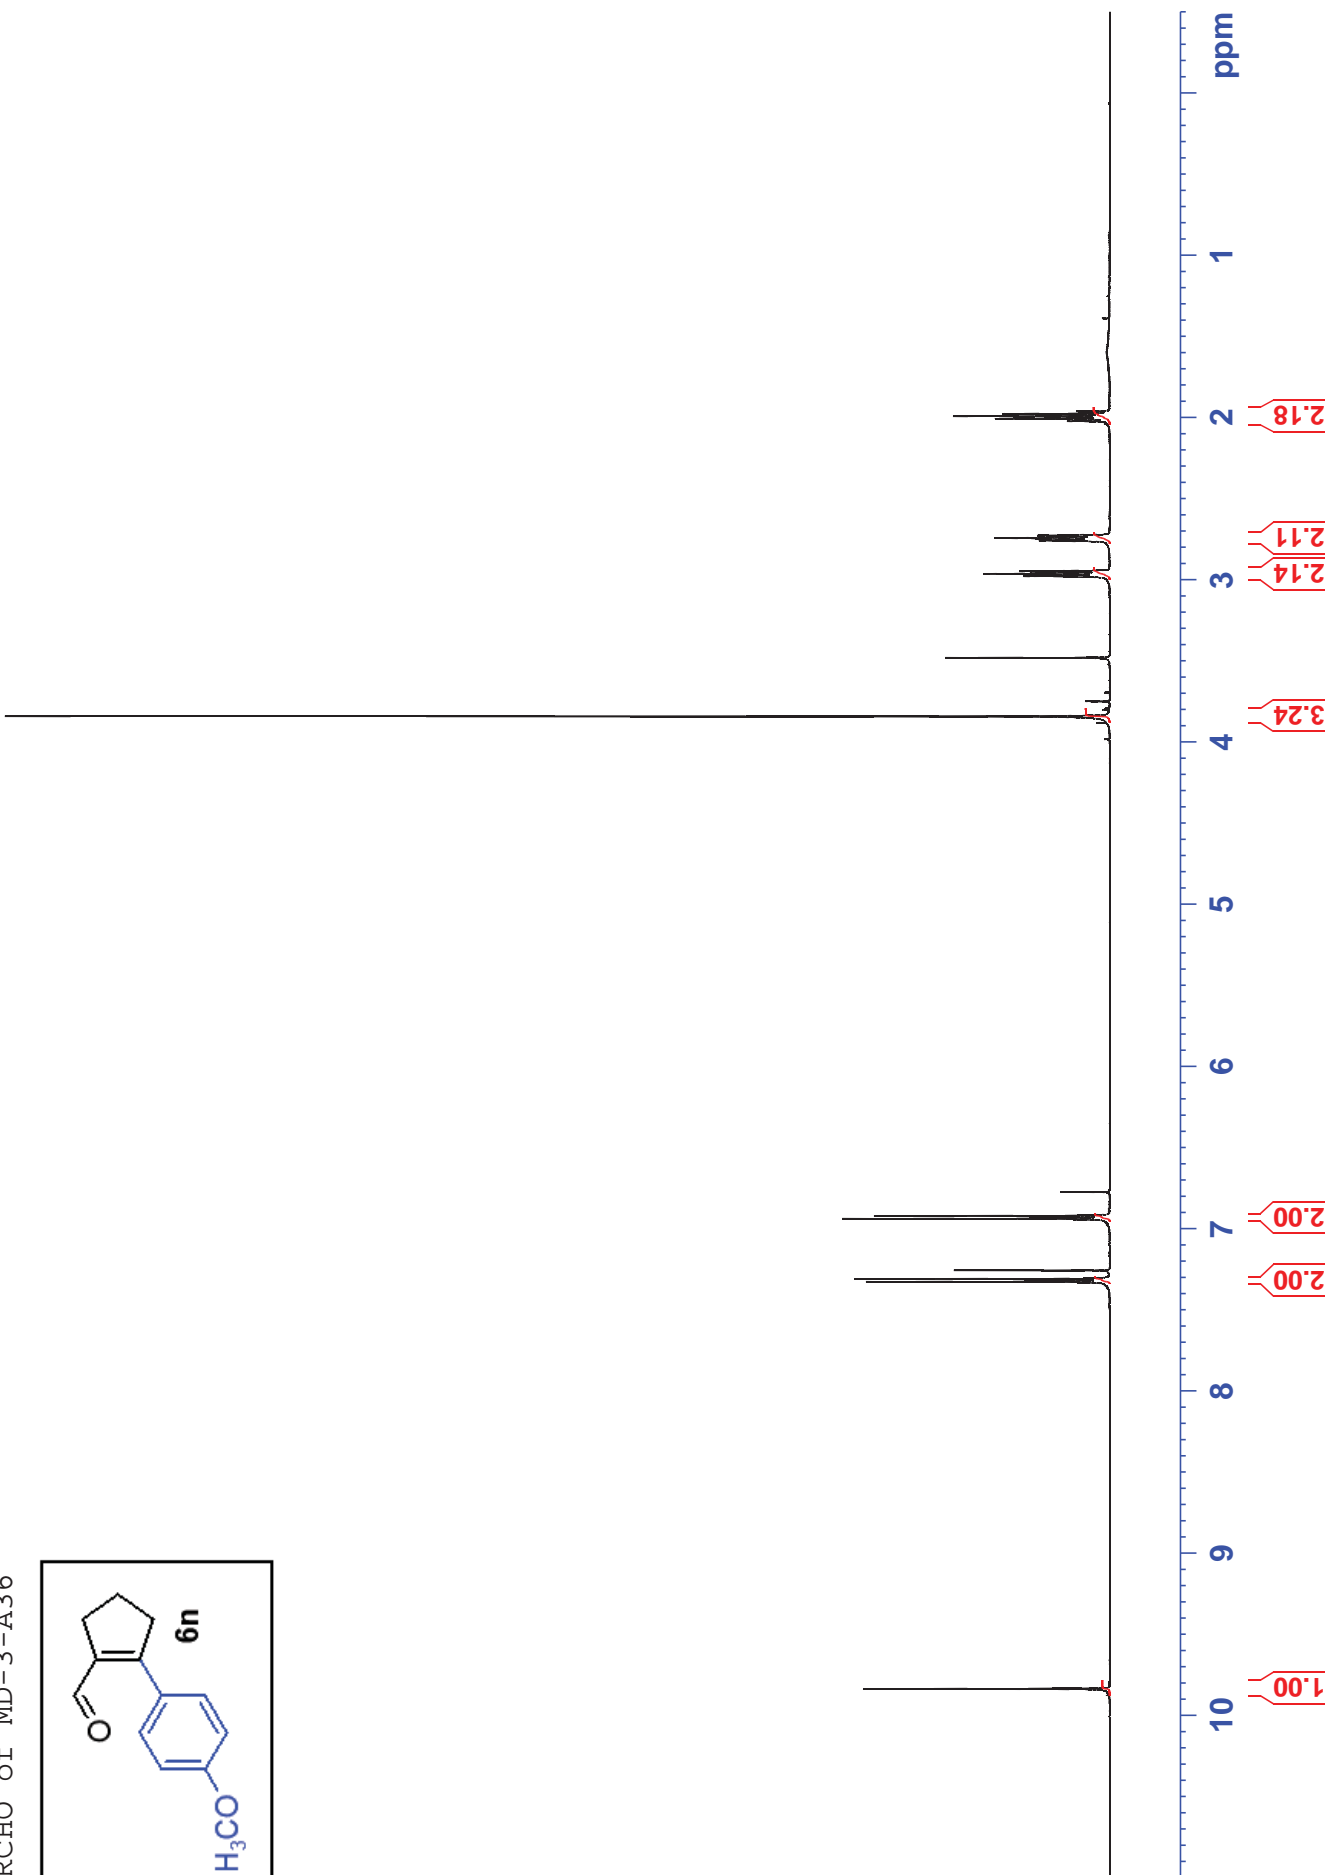

RPD-FGF23-A77(4)  
RCHO of MD-3-A36

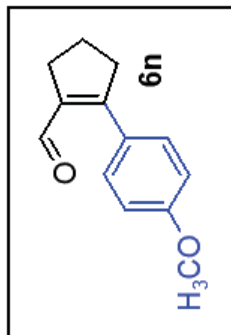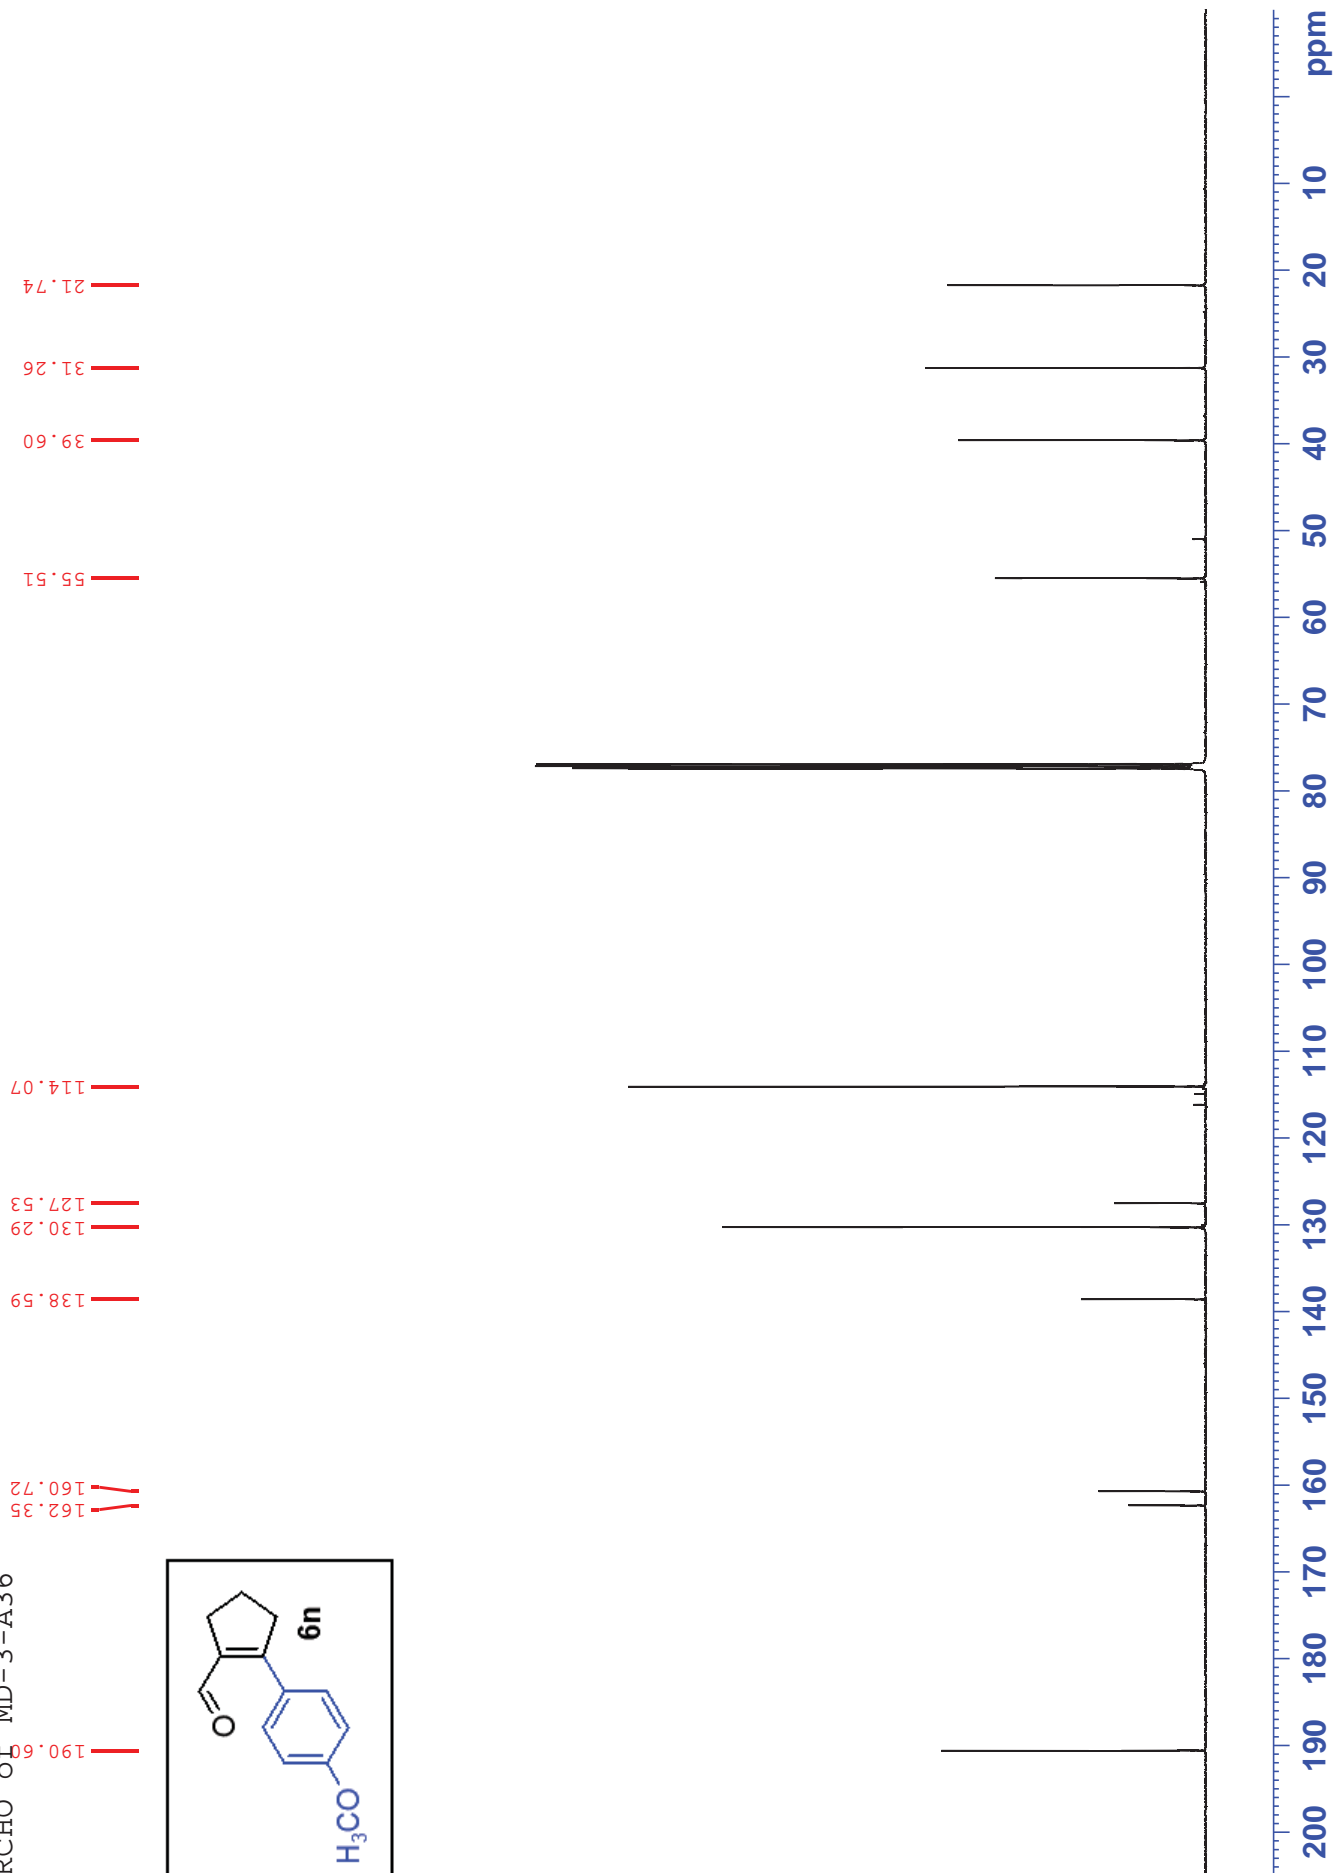

RPD-FGF23-A-79(5)  
RCHO of MD-3-A39

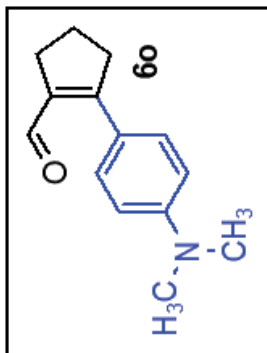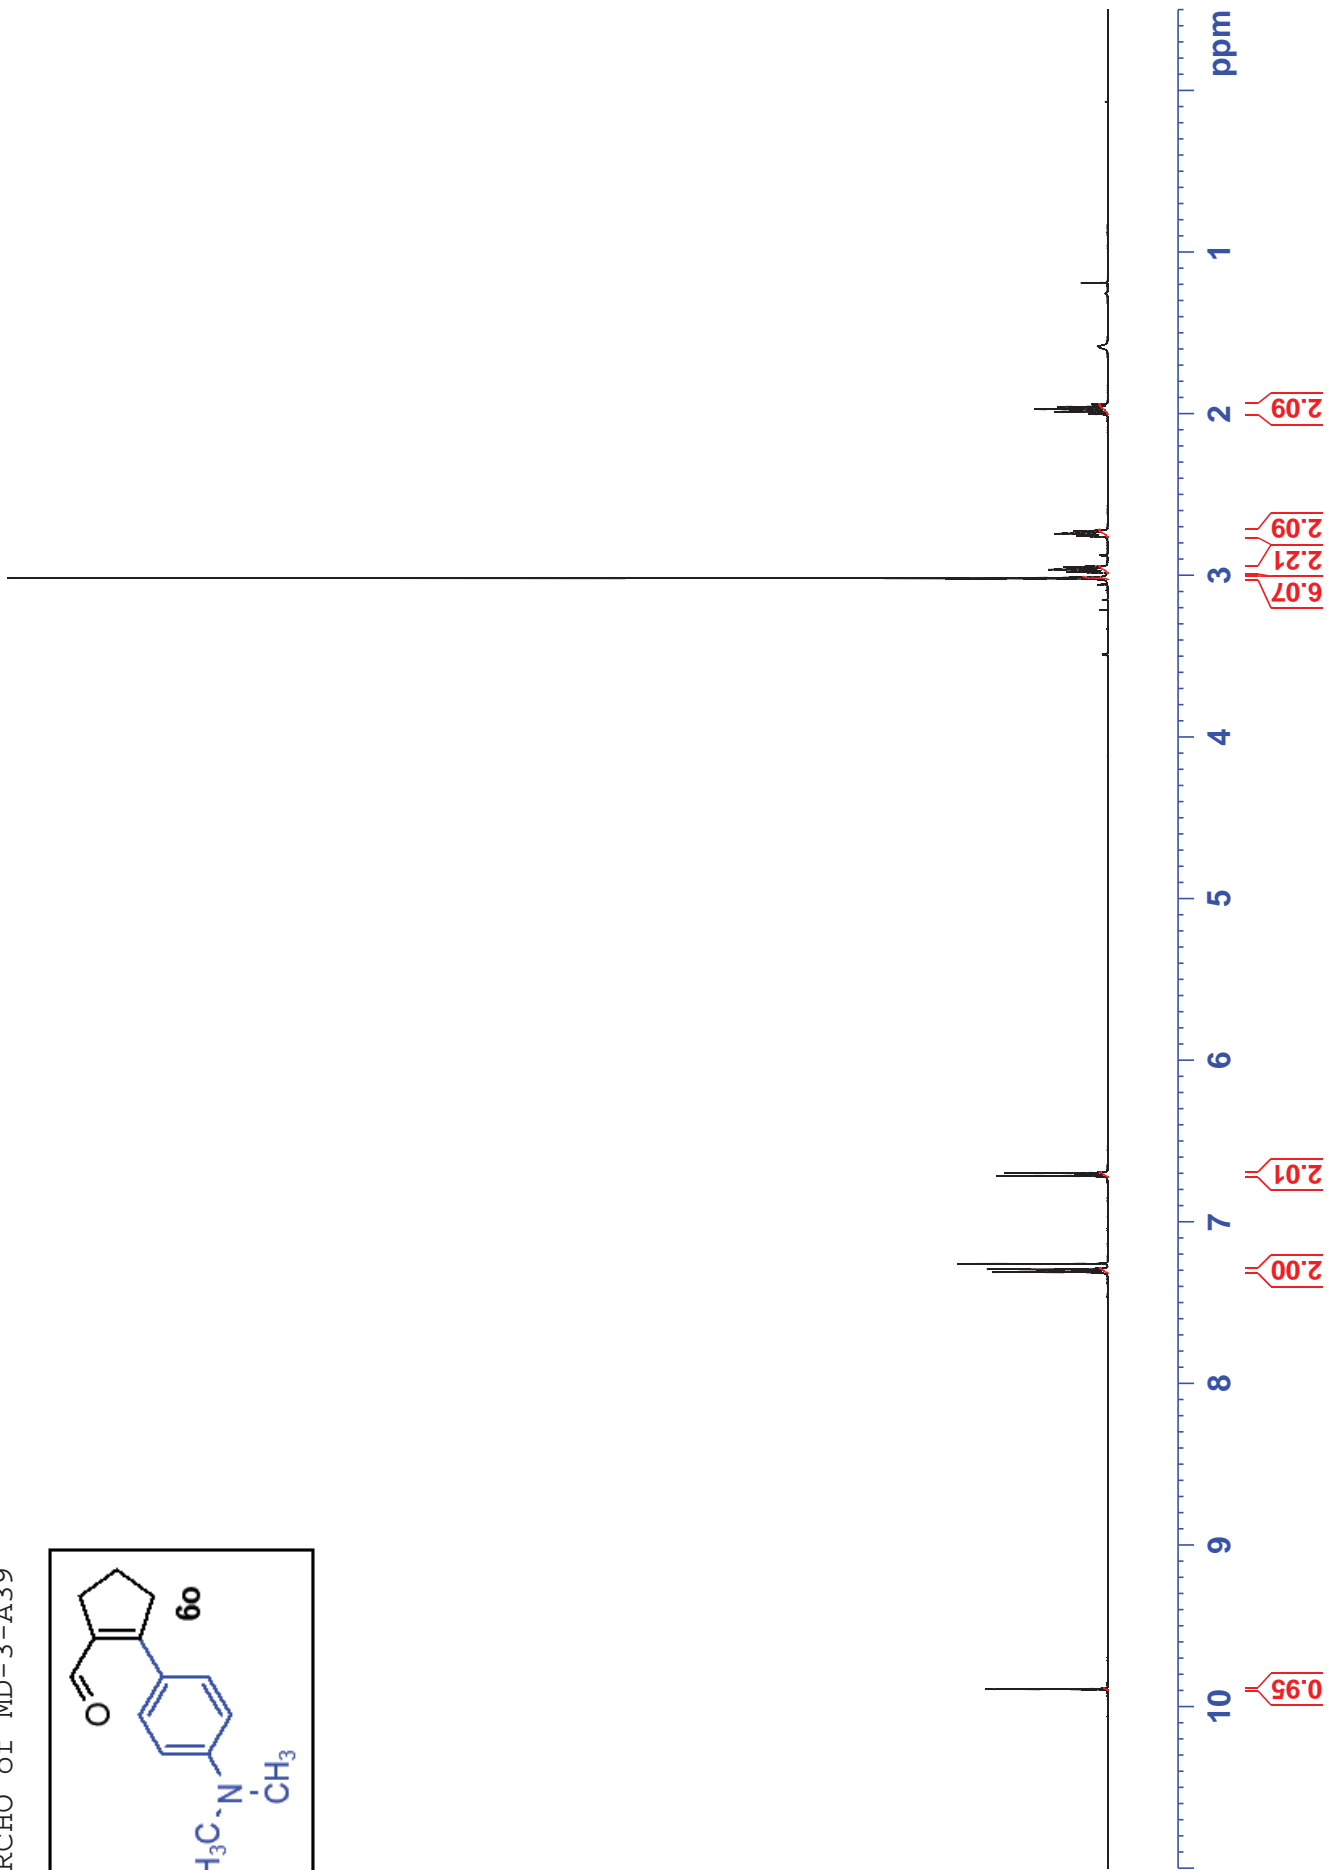



RPD-FGF23-A-79(5)  
RCHO of MD-3-A39

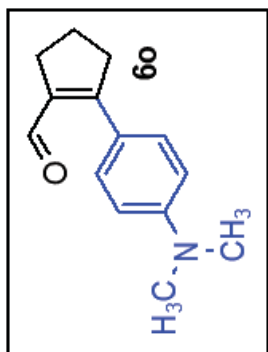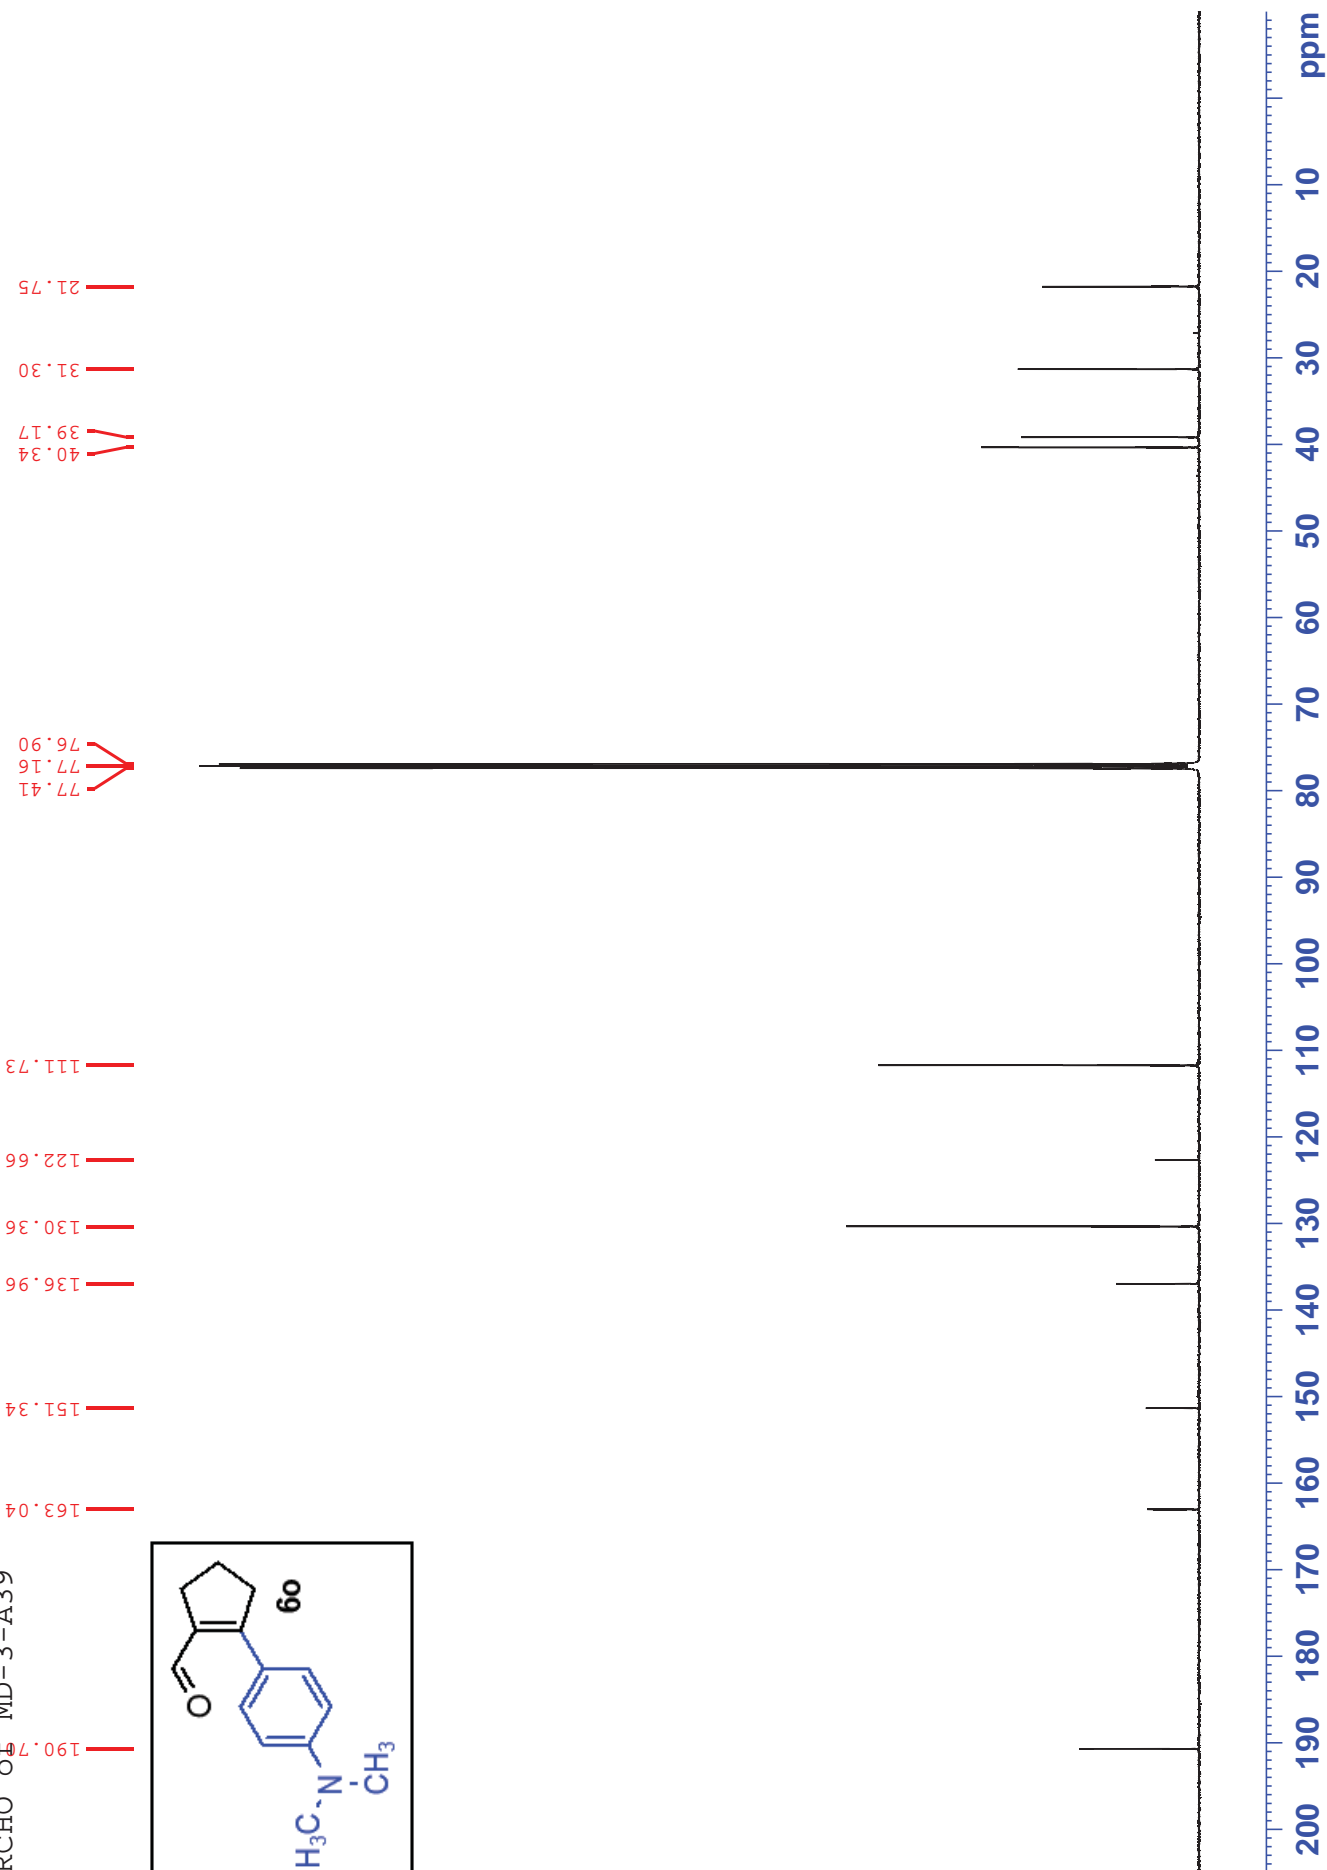

RPD-FGF23-A-83(3)  
RCHO of MD-3-A40

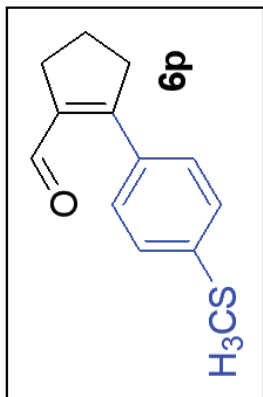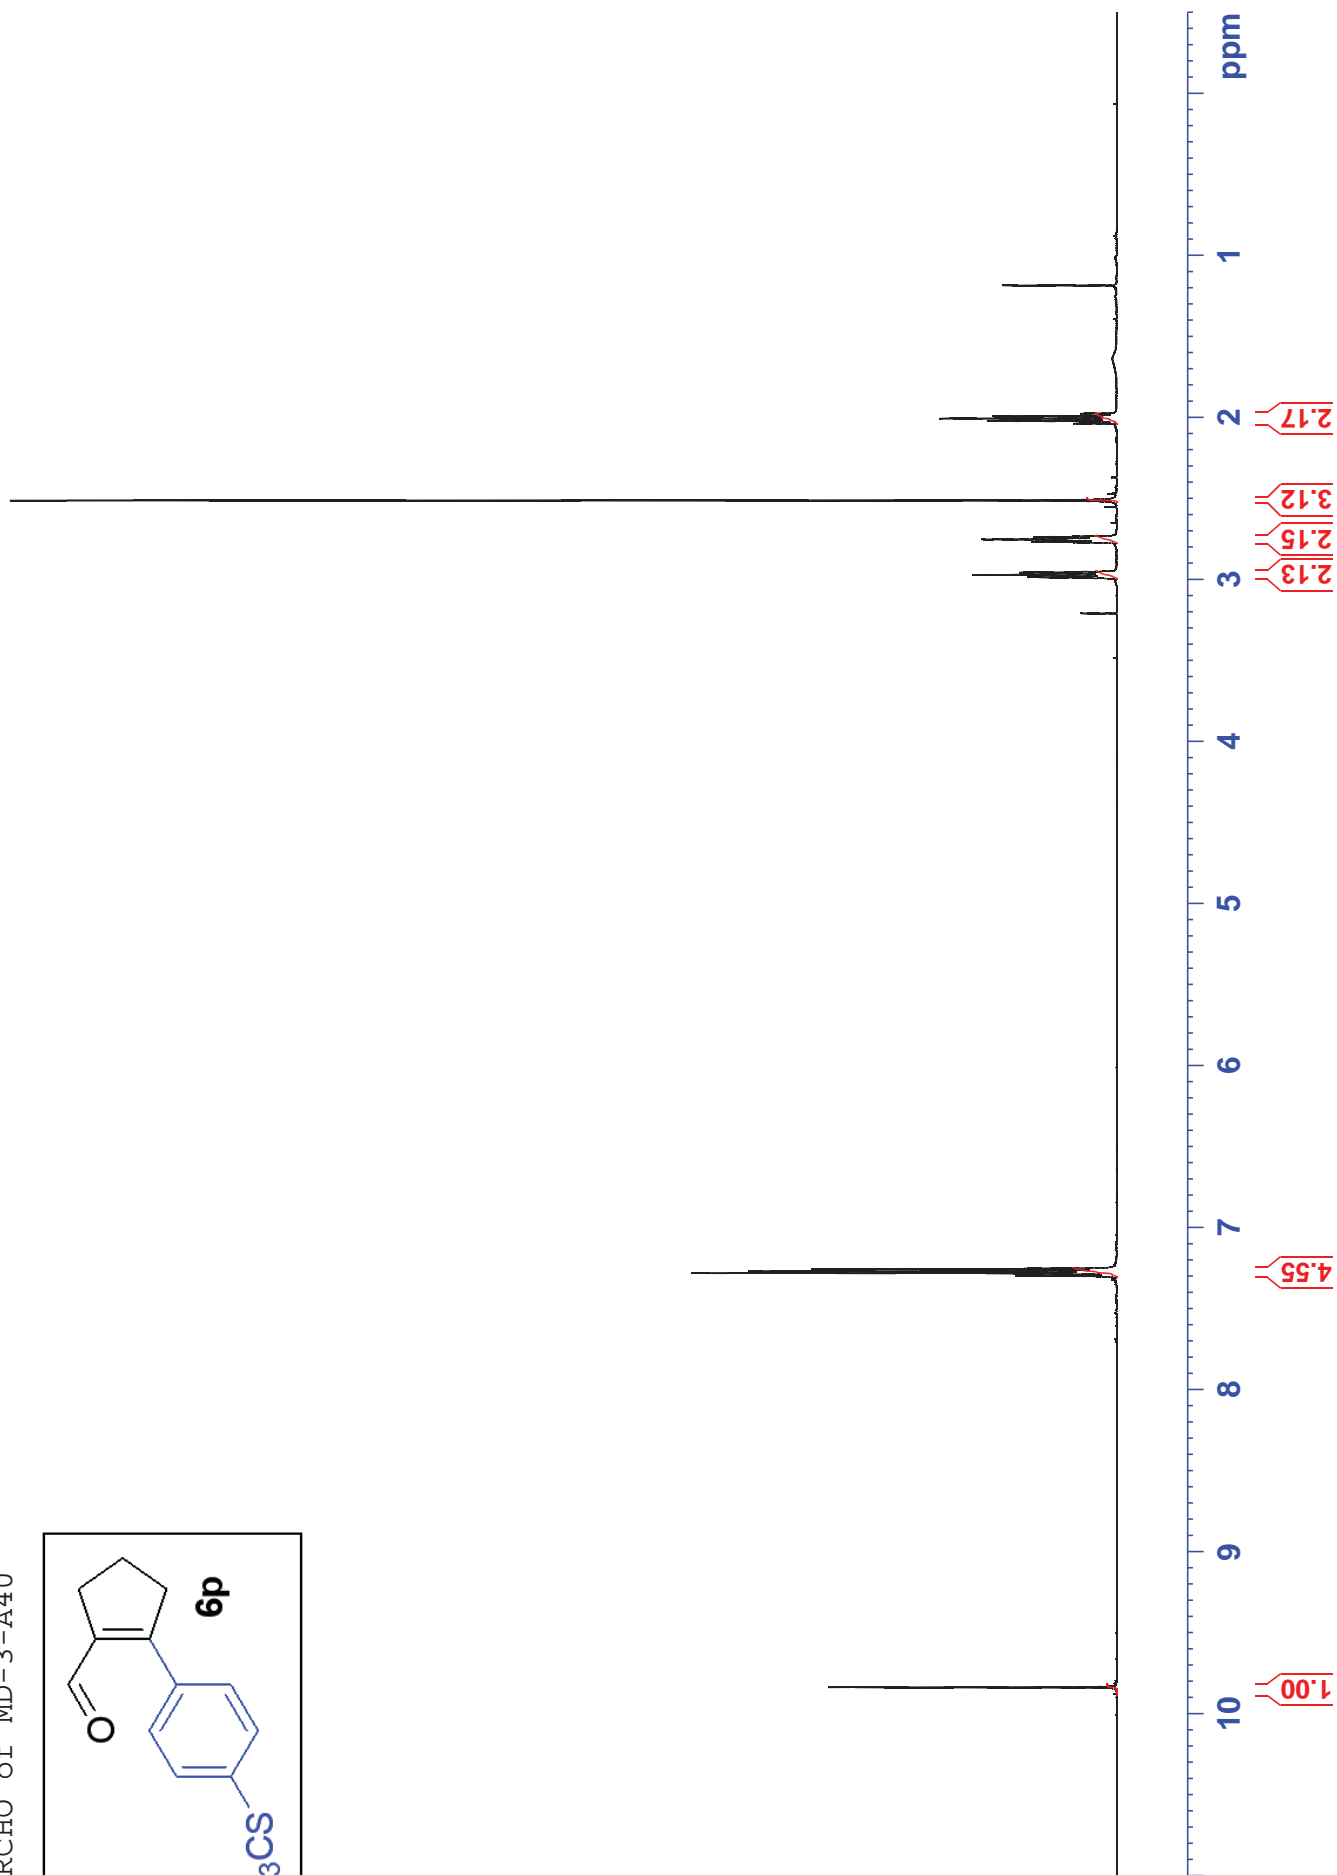

RPD-FGF23-A-83(3)  
RCHO of MD-3-A40

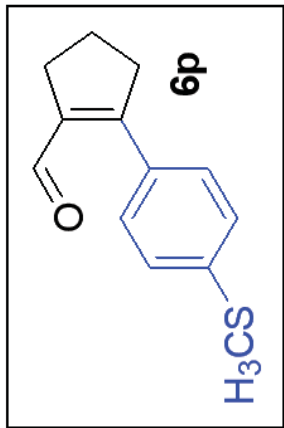

190.34

161.86

140.76

139.44

131.52

129.18

126.01

39.57

31.32

21.75

15.47

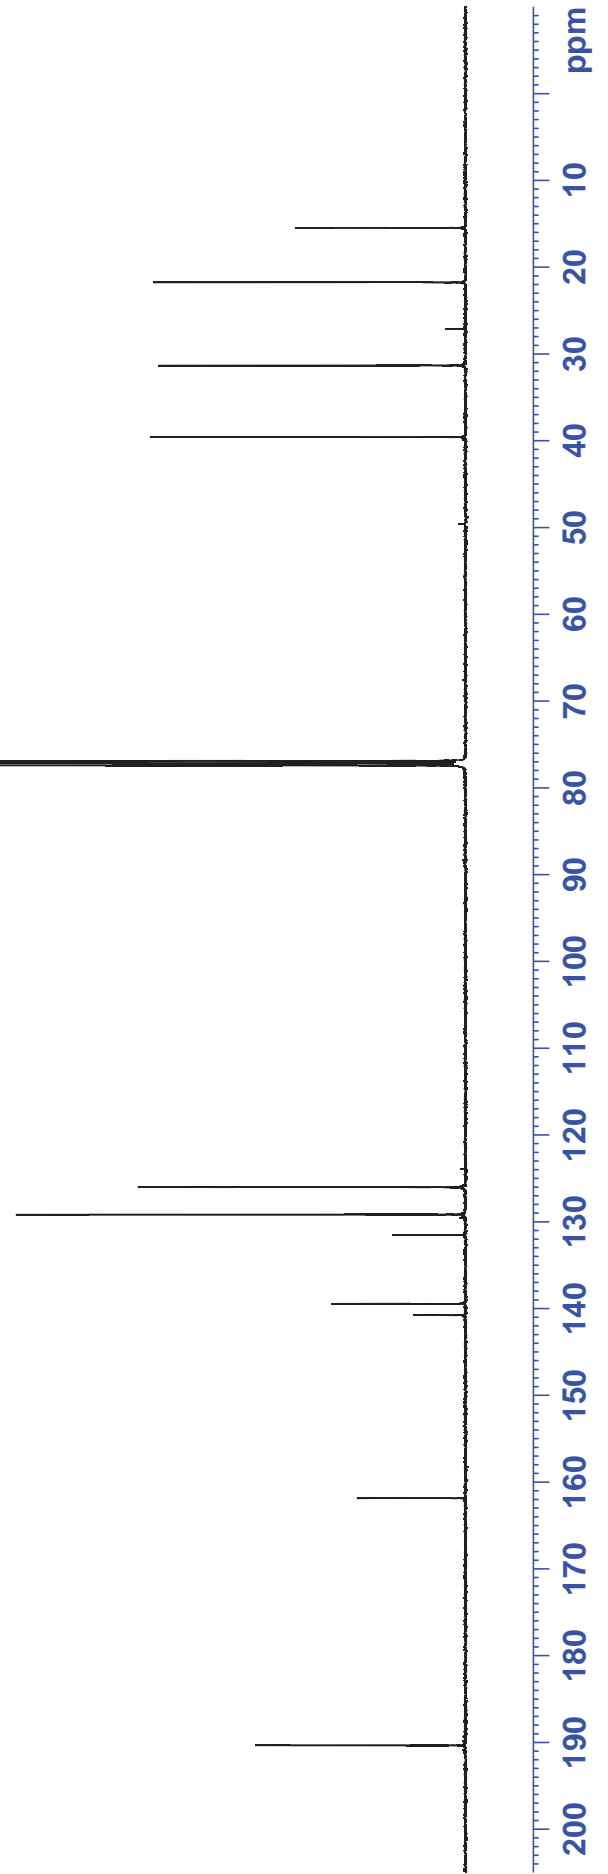



RPD-FGF23-A-97 (2)  
RCHO of MD-3-A41

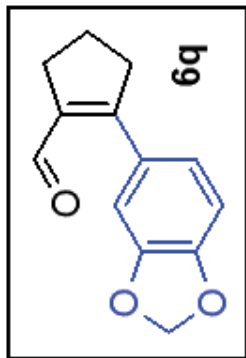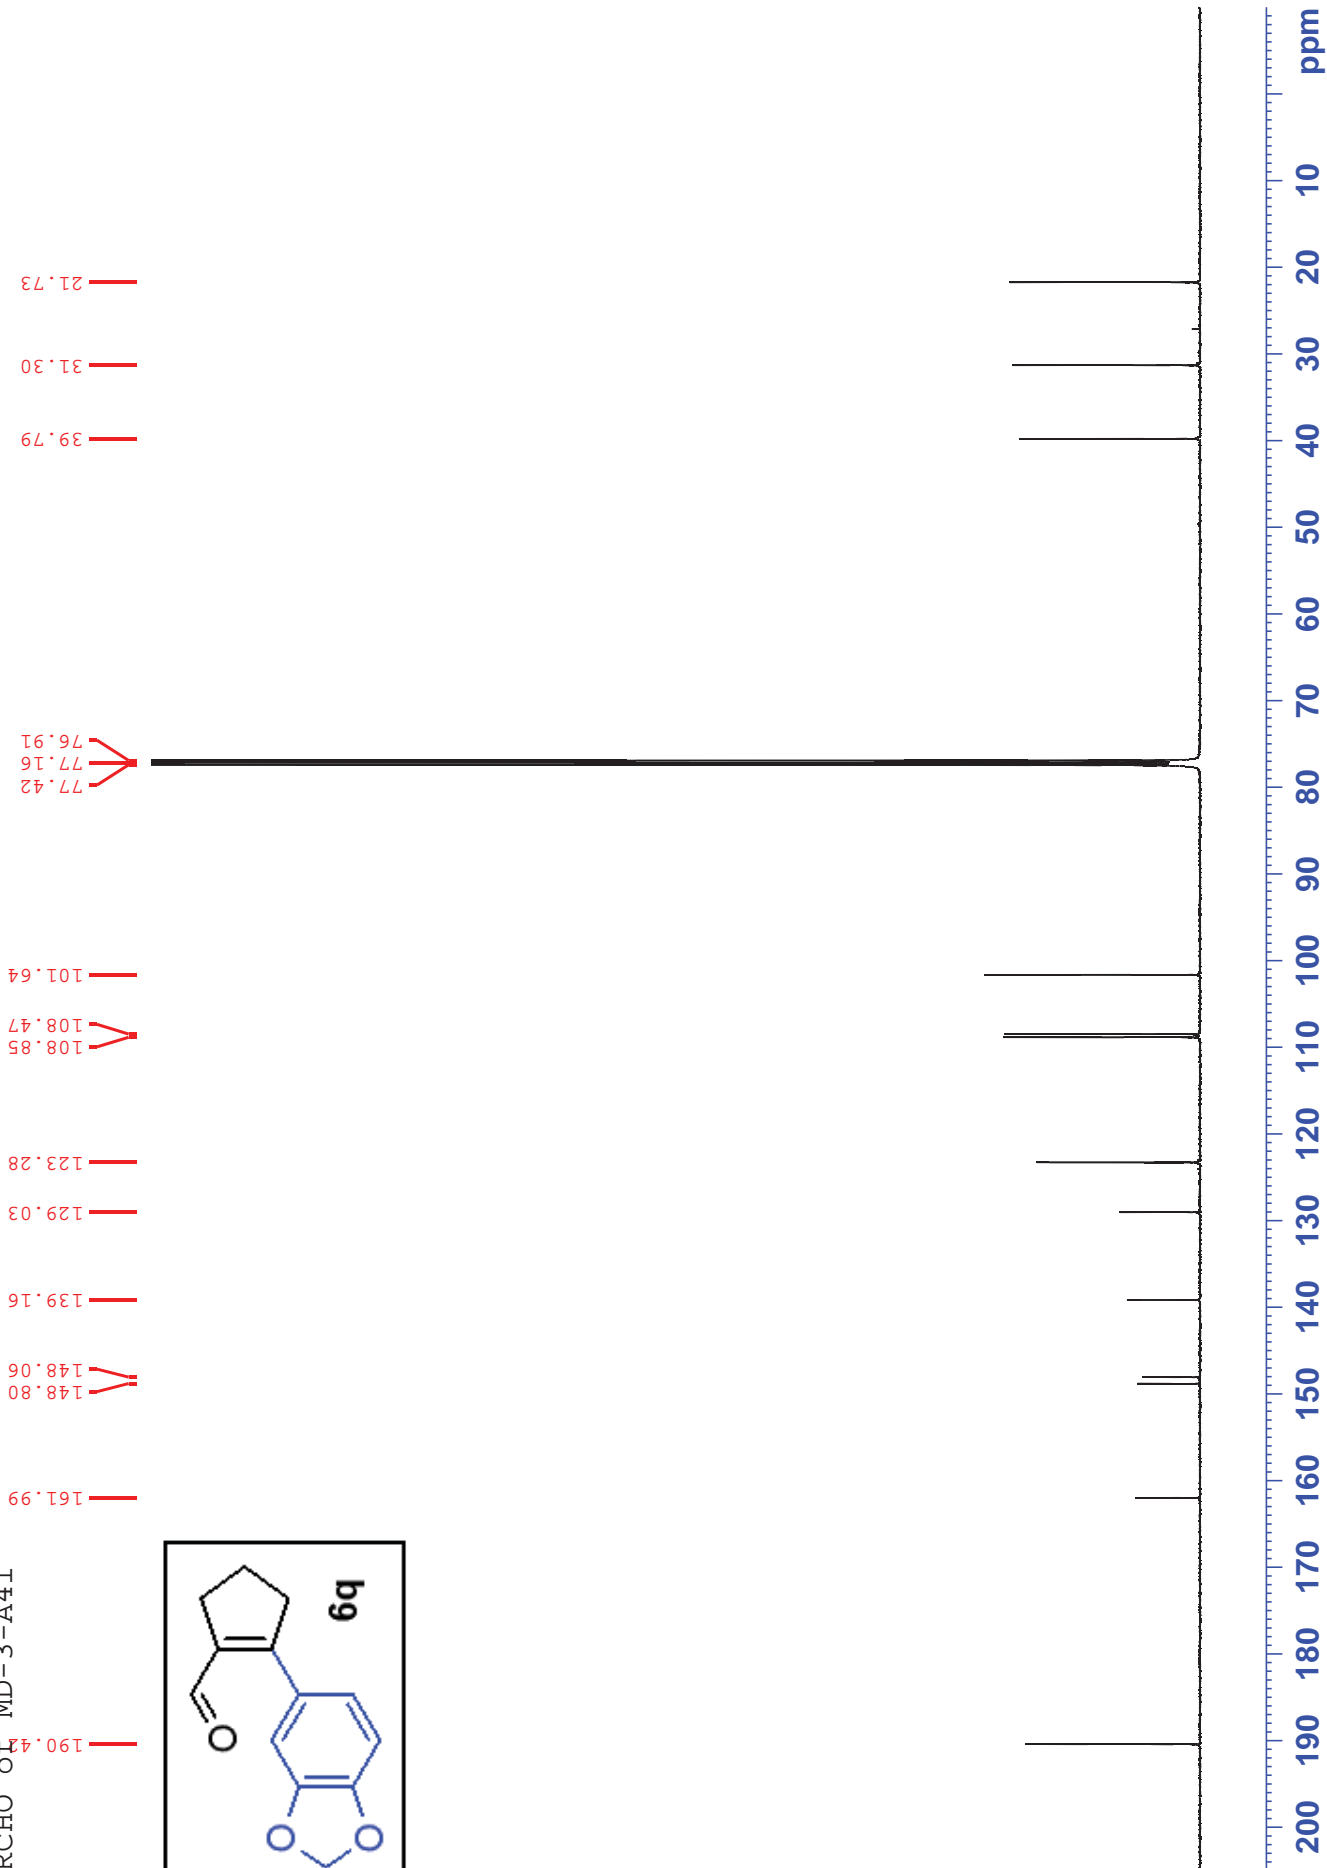

RPD-FGF23-A-25 (2)  
RCHO of MD-3-A25

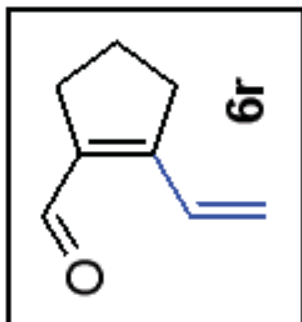

S58

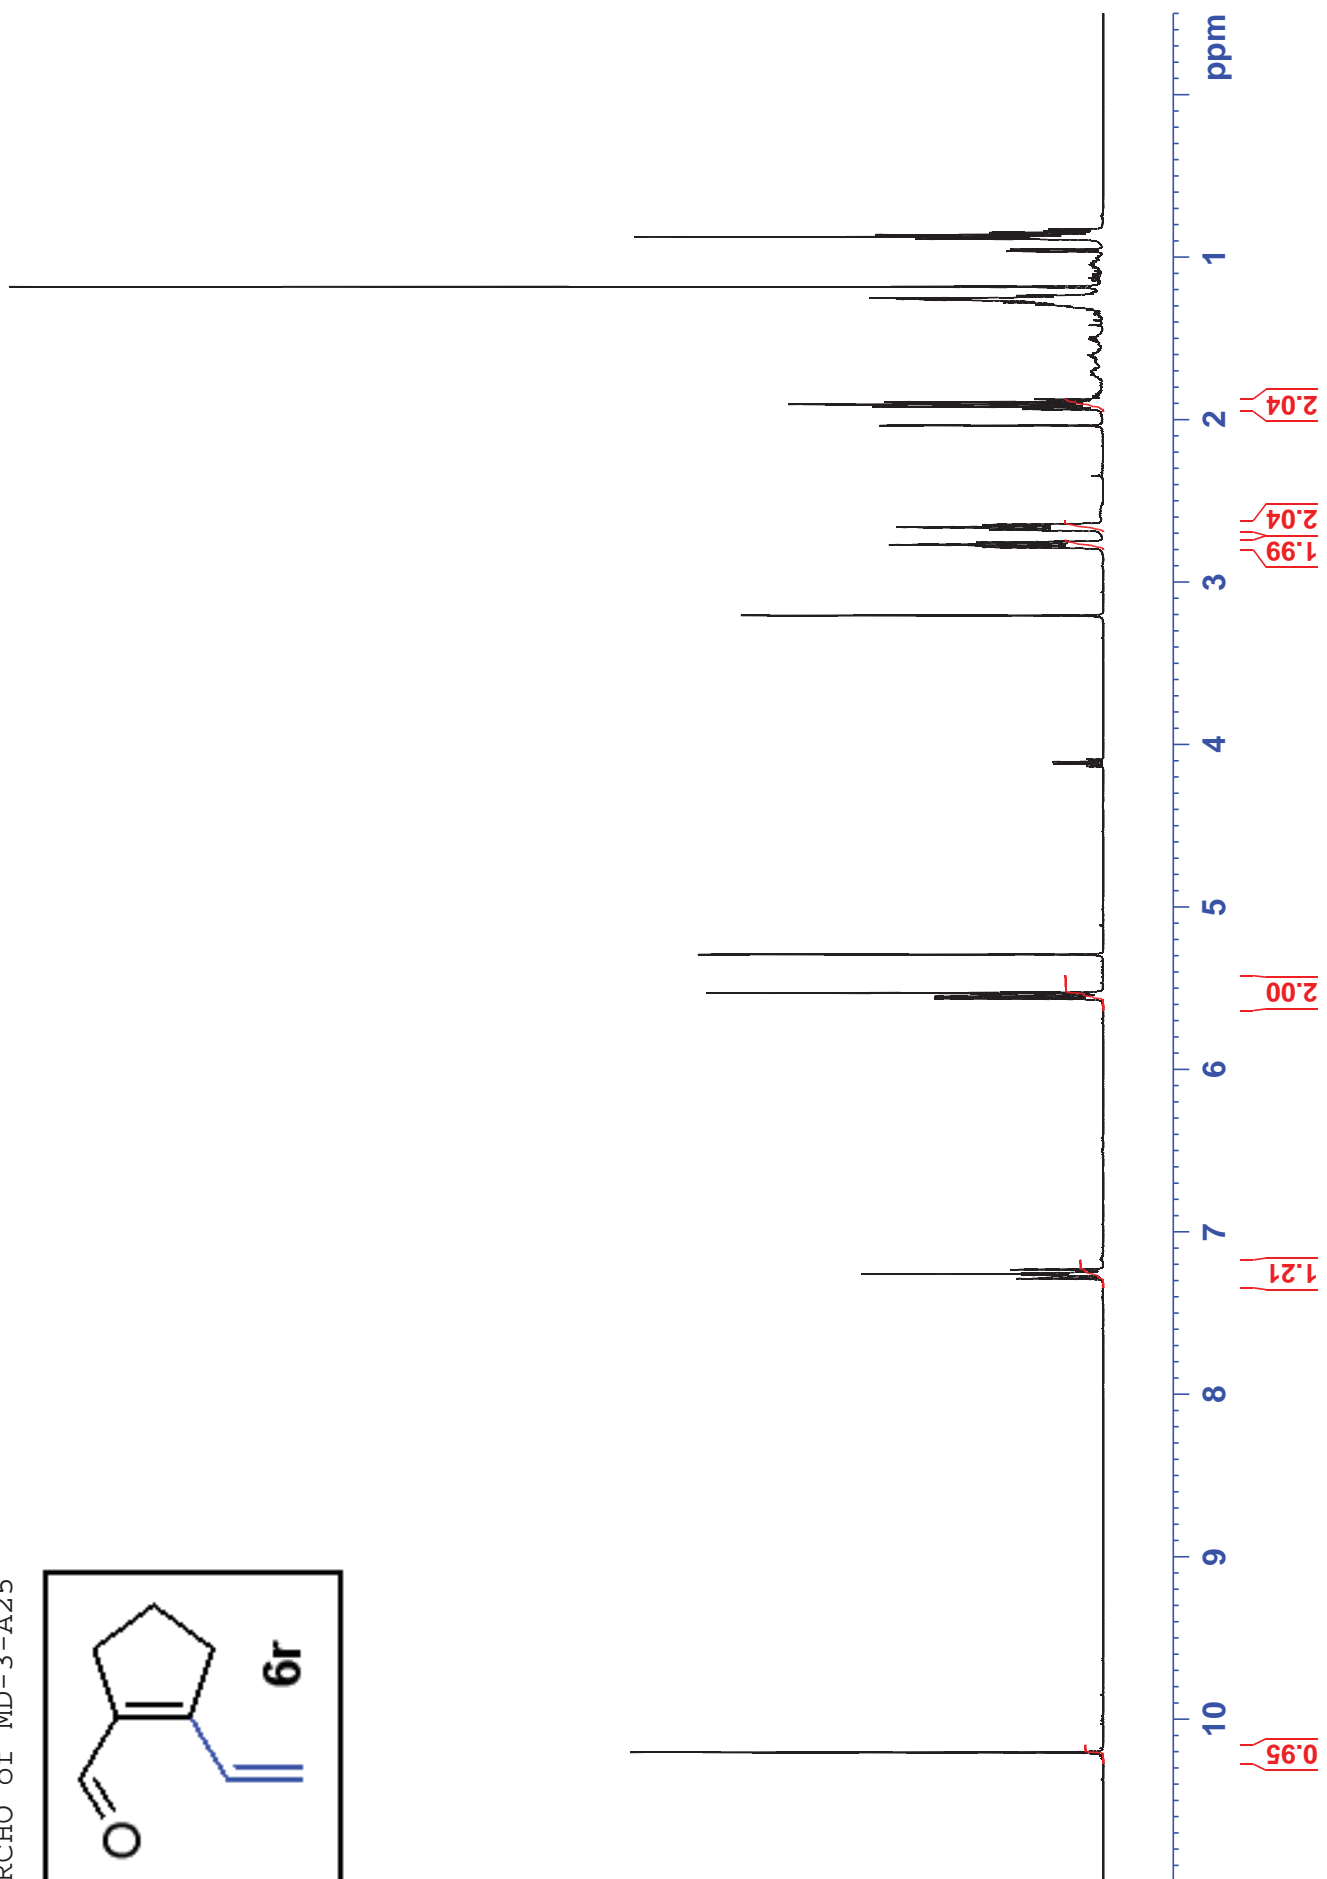

RPD-FGF23-A-69 (5)  
RCHO of MD-3-A33

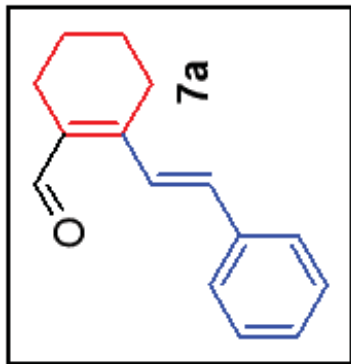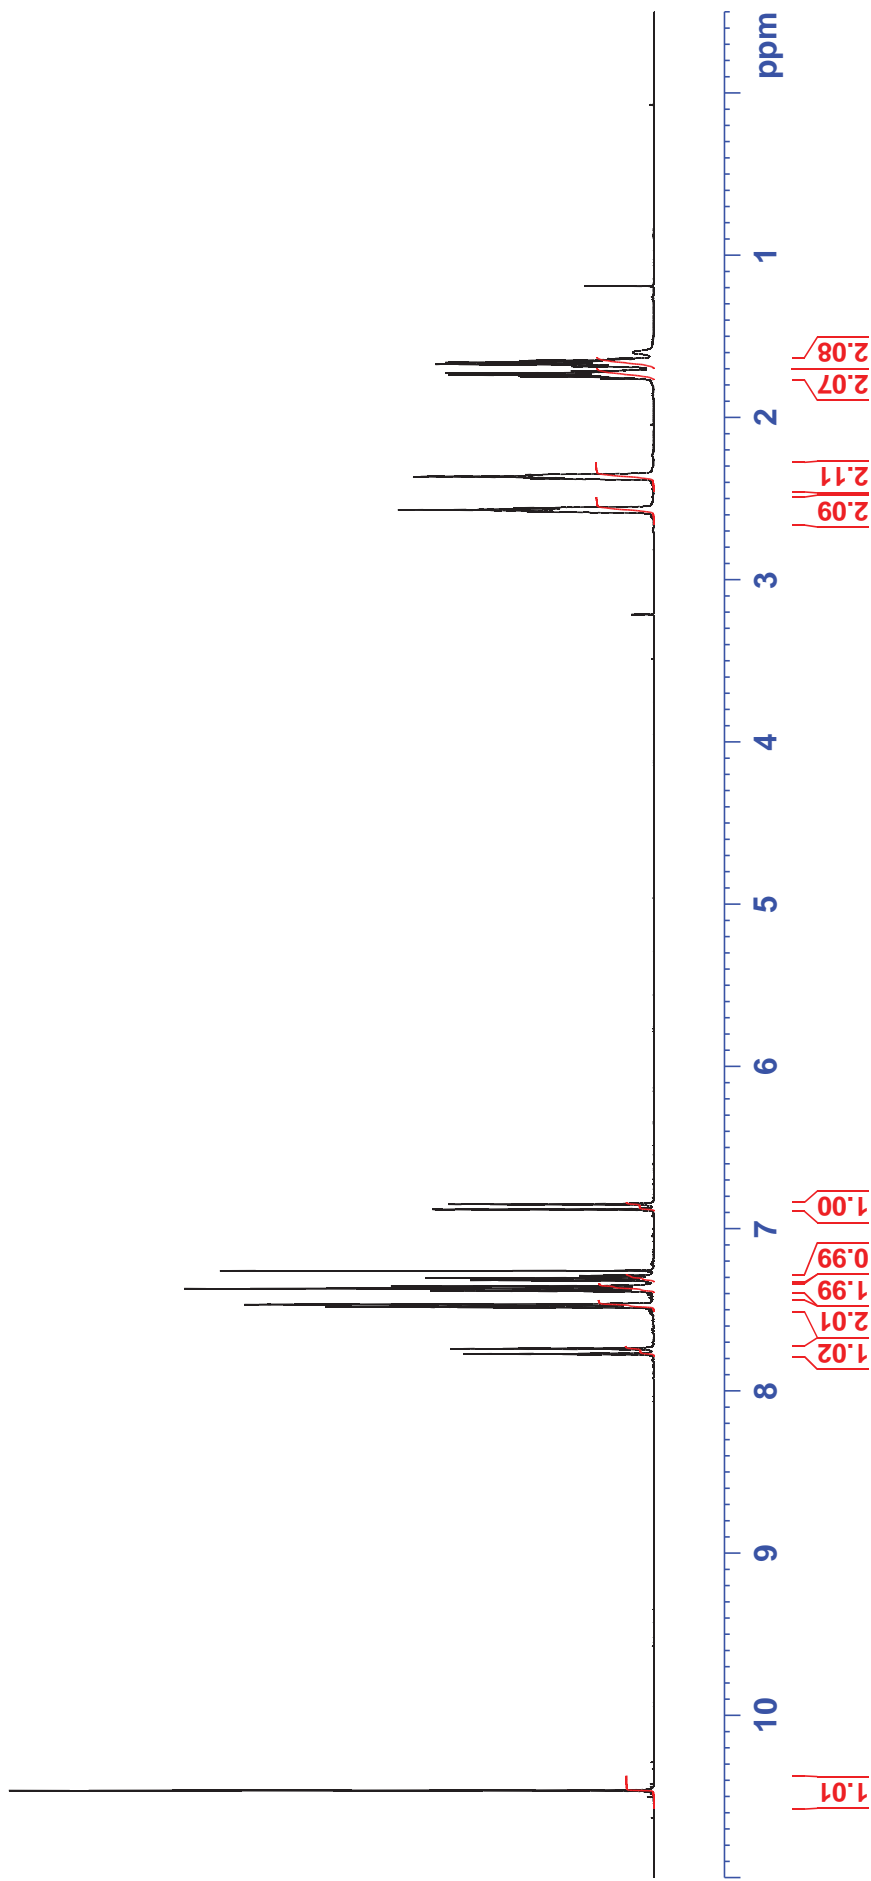

RPD-FGF23-A-69(5)  
RCHO of MD-3-A33

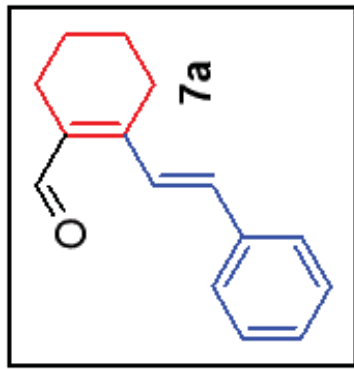

190.60

151.75

136.75  
135.90  
133.60  
128.99  
128.78  
127.11  
123.49

77.41  
77.15  
76.90

27.70  
23.42  
22.12  
21.66

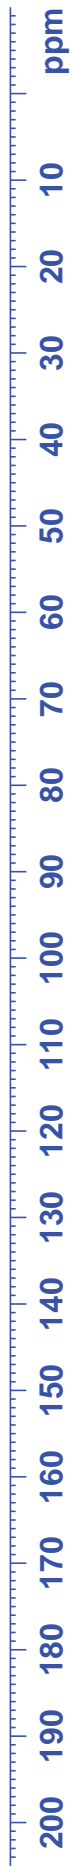



RPD-FGF23-A-71 (4)  
RCHO of MD-3-A34

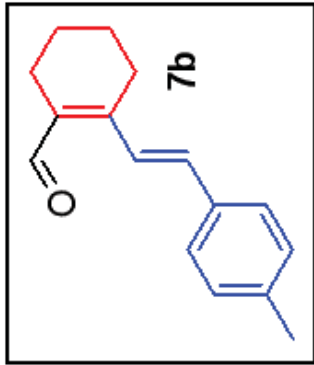

S61

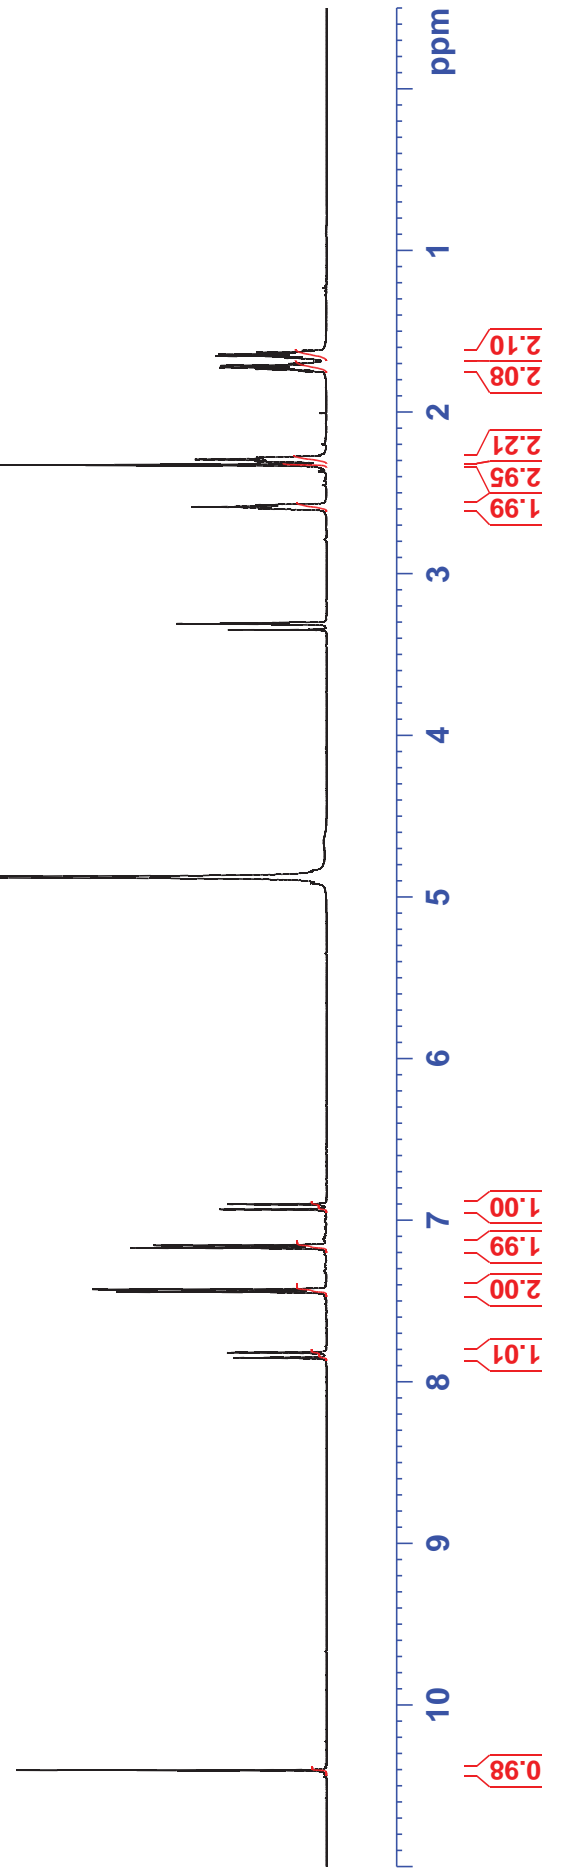

RPD-FGF23-A-71 (4)  
RCHO of MD-3-A34

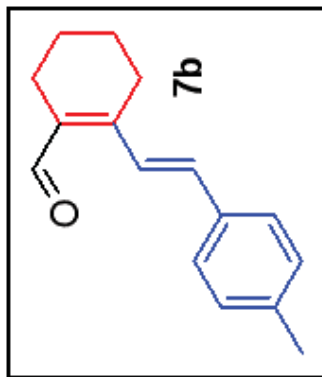

28.40  
24.18  
23.14  
22.65  
21.31

139.91  
136.09  
135.34  
135.11  
130.47  
128.21  
123.19

154.36

192.60

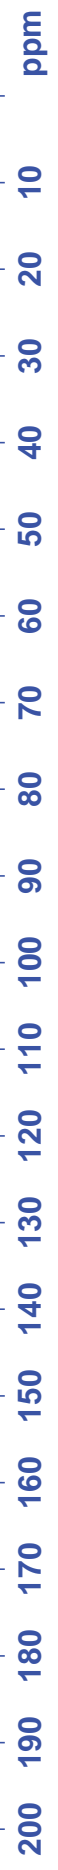

AEL-FGF23-A-141 (2)  
RCHO of MD-3-A45

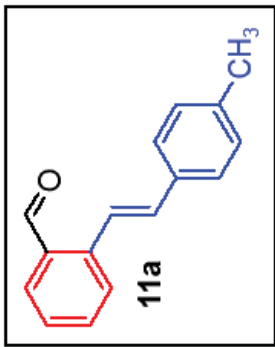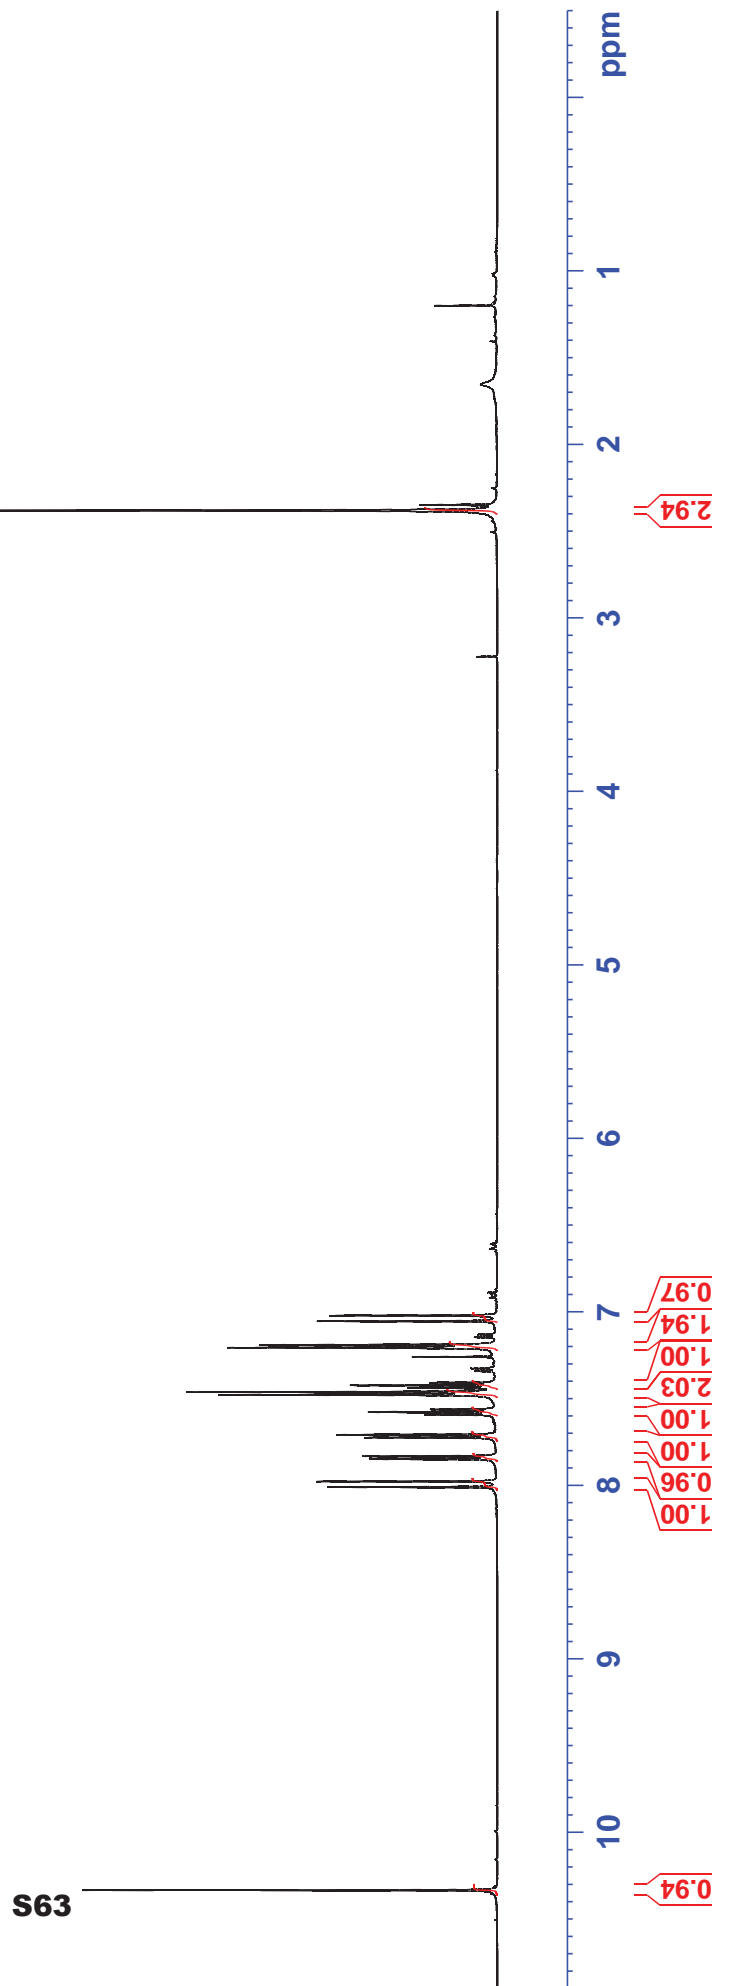

AEL-FGF23-A-141 (2)  
RCHO of MD-3-A45

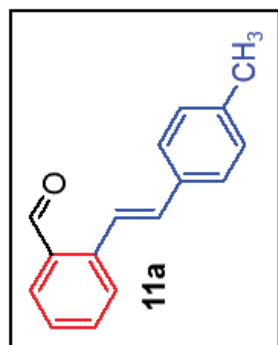

192.09

140.35  
138.49  
134.26  
134.17  
133.82  
132.98  
132.25  
129.61  
127.53  
127.22  
127.03  
123.74

21.44

S64

200 190 180 170 160 150 140 130 120 110 100 90 80 70 60 50 40 30 20 10 ppm

MOI-FGF23-A-123 (2)  
RCHO of MD-3-A46

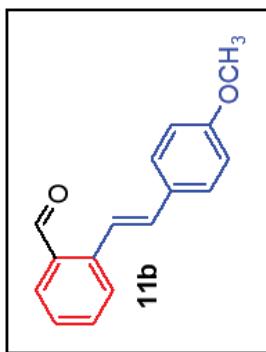

S65

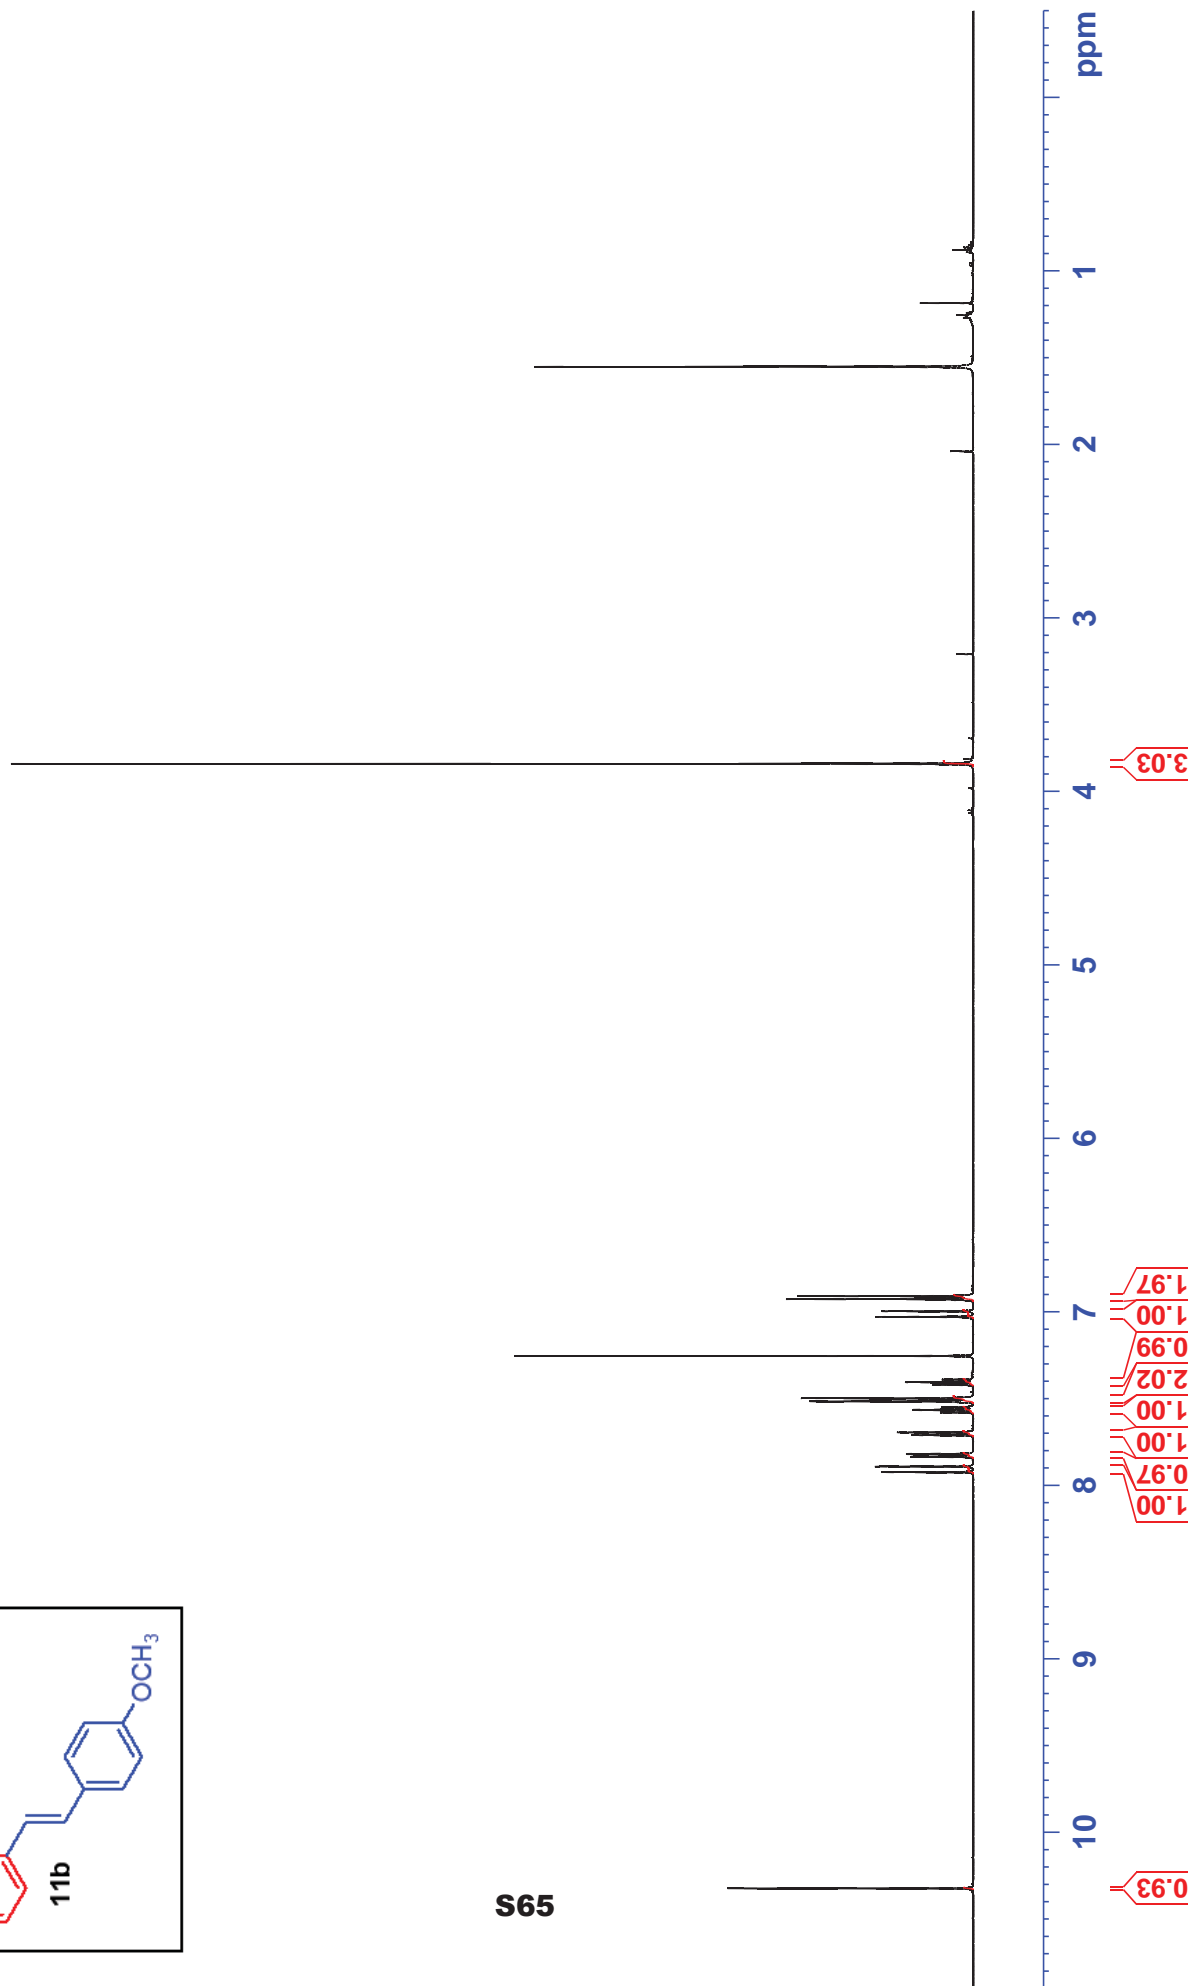

MOI-FGF23-A-123(2)  
RCHO of MD-3-A46

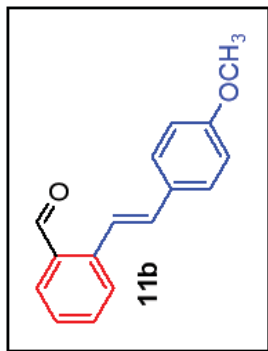

192.10

159.92

114.28

122.51

127.04

127.28

128.36

129.81

132.27

132.82

133.73

133.75

140.44

55.42

S66

200 190 180 170 160 150 140 130 120 110 100 90 80 70 60 50 40 30 20 10 ppm

AEI-FGF23-A-135(2)  
RCHO of MD-3-A52

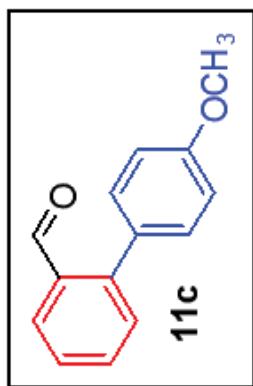

S67

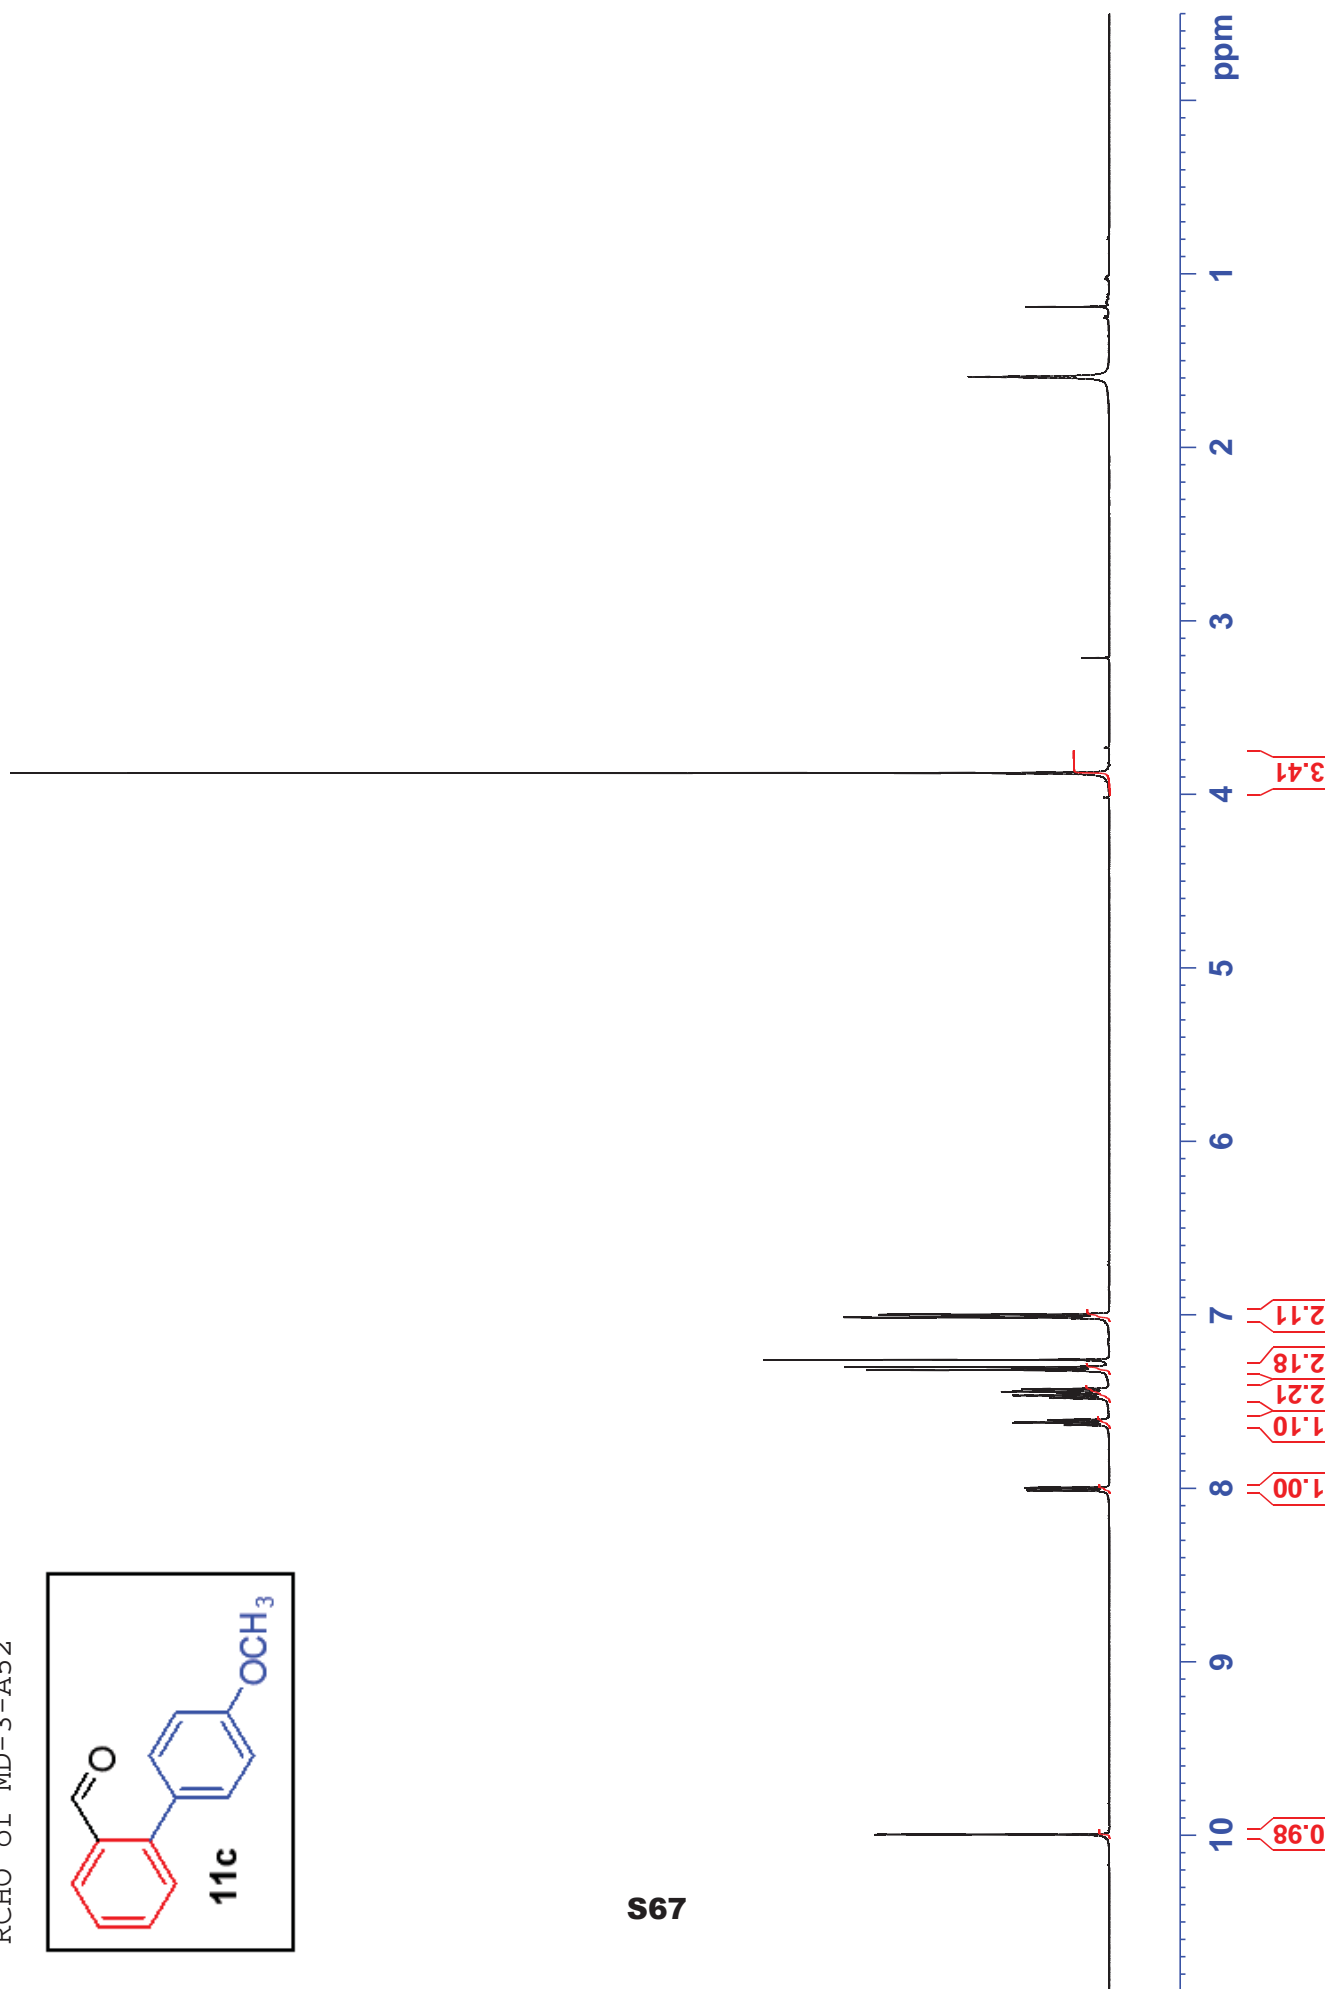

AEL-FGF23-A-135 (2)  
RCHO of MD-3-A52

- 192.84
- 159.85
- 145.81
- 133.90
- 133.68
- 131.45
- 130.93
- 130.17
- 127.76
- 127.52
- 114.08
- 55.55

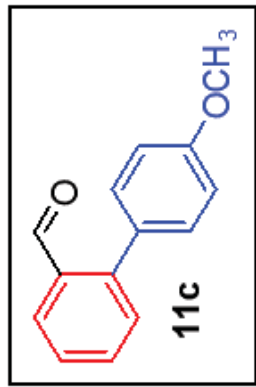

S68

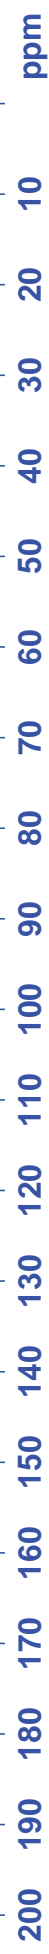



MOI-FGF23-A-55 (3)  
RCHO of MD-3-A53

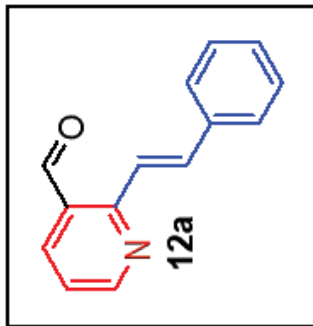

699

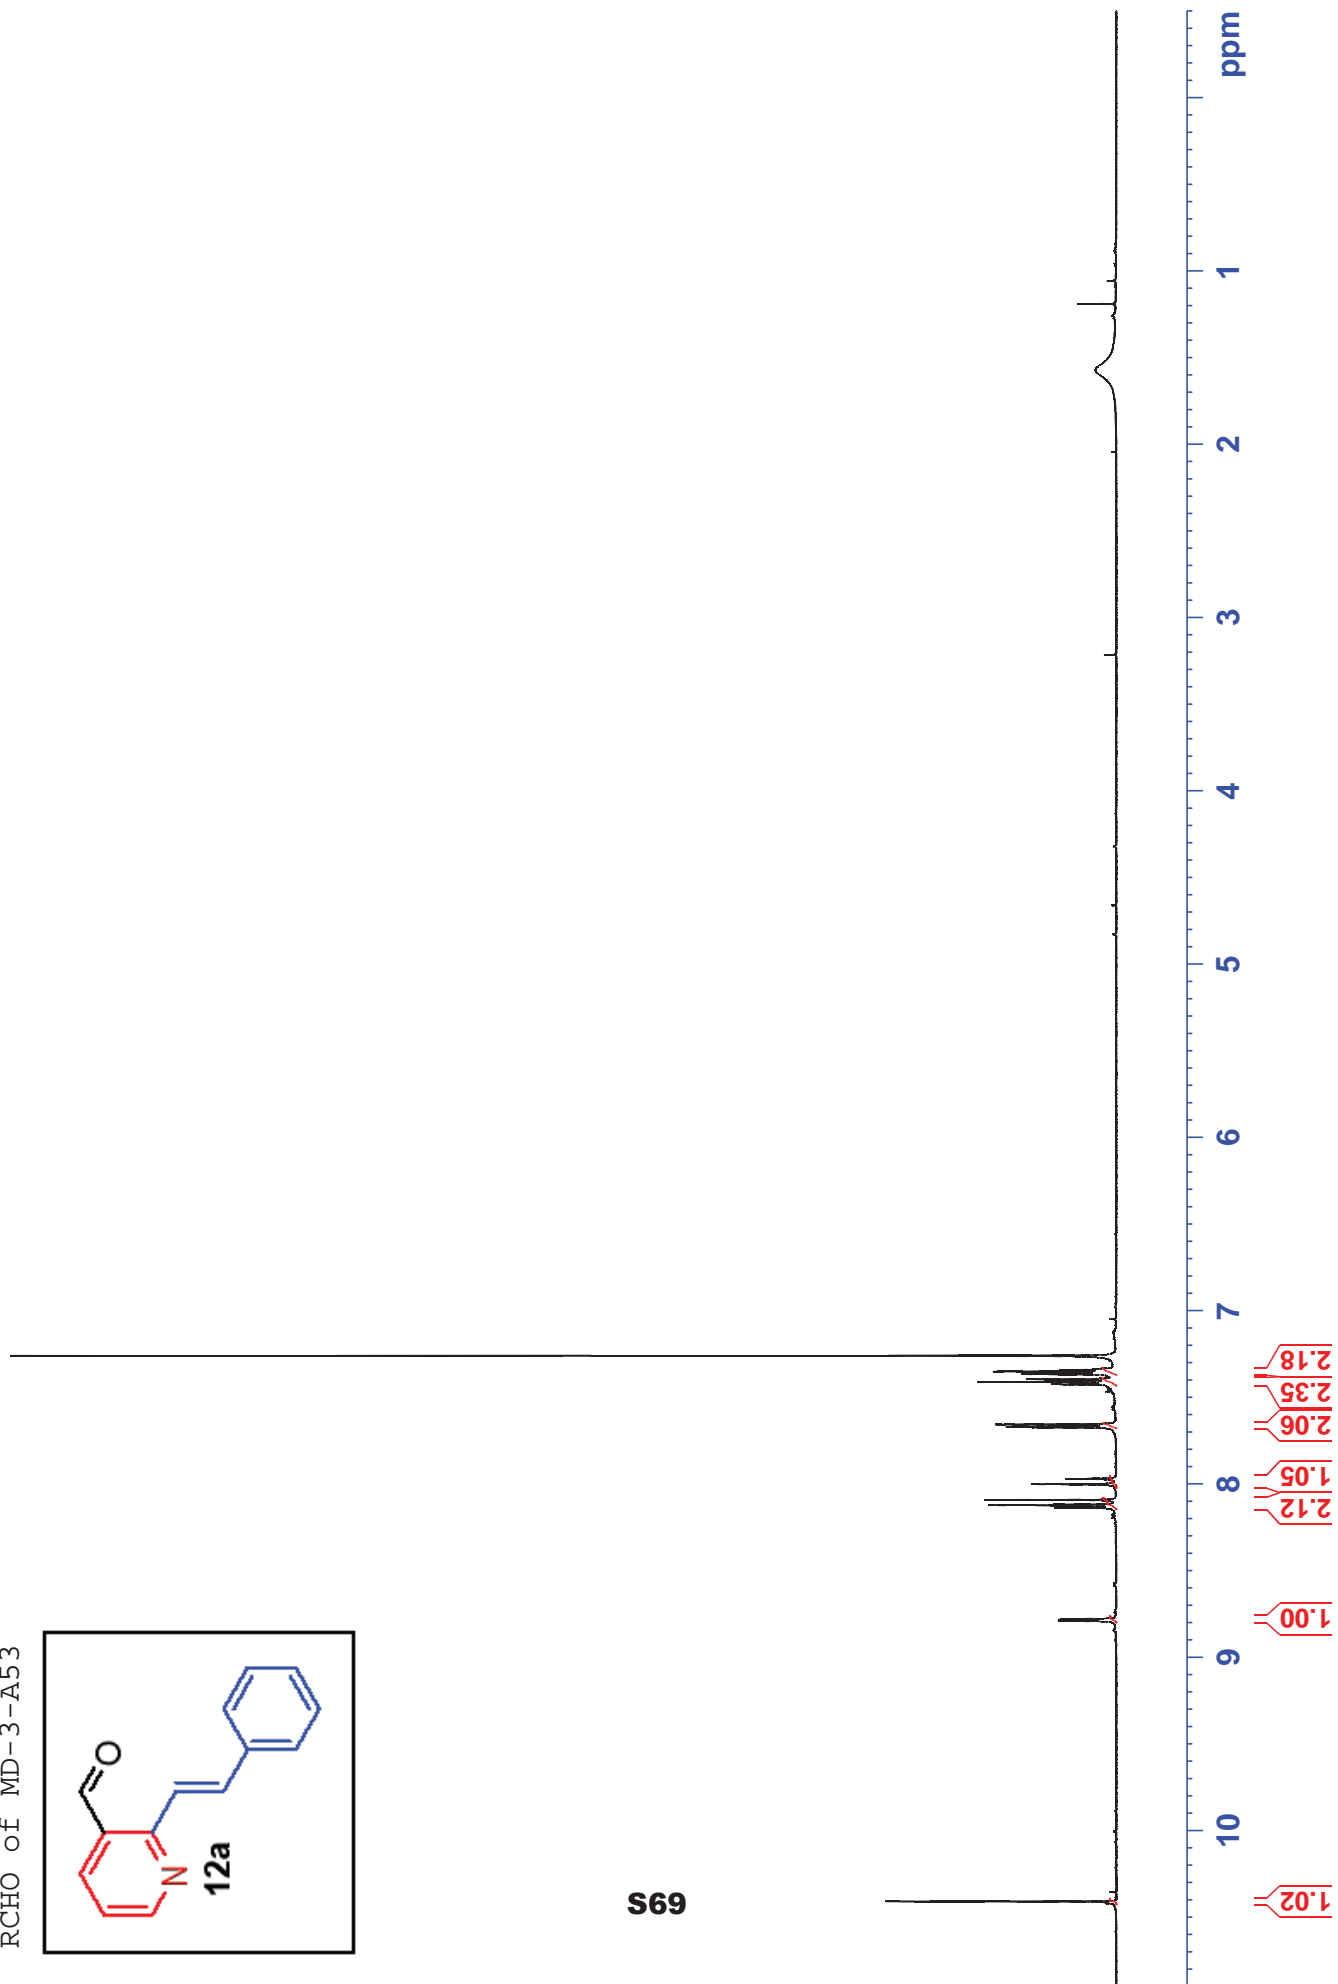

MOI-FGF23-A-55 (2)  
RCHO of MD-3-A53

191.1

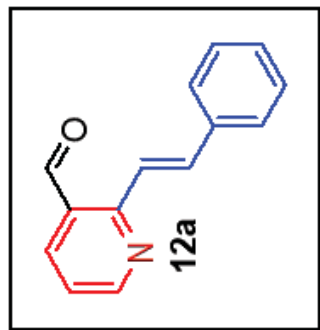

139.82  
138.60  
136.43  
129.35  
128.98  
127.96  
127.93  
122.48  
122.31

156.22  
153.43

S70

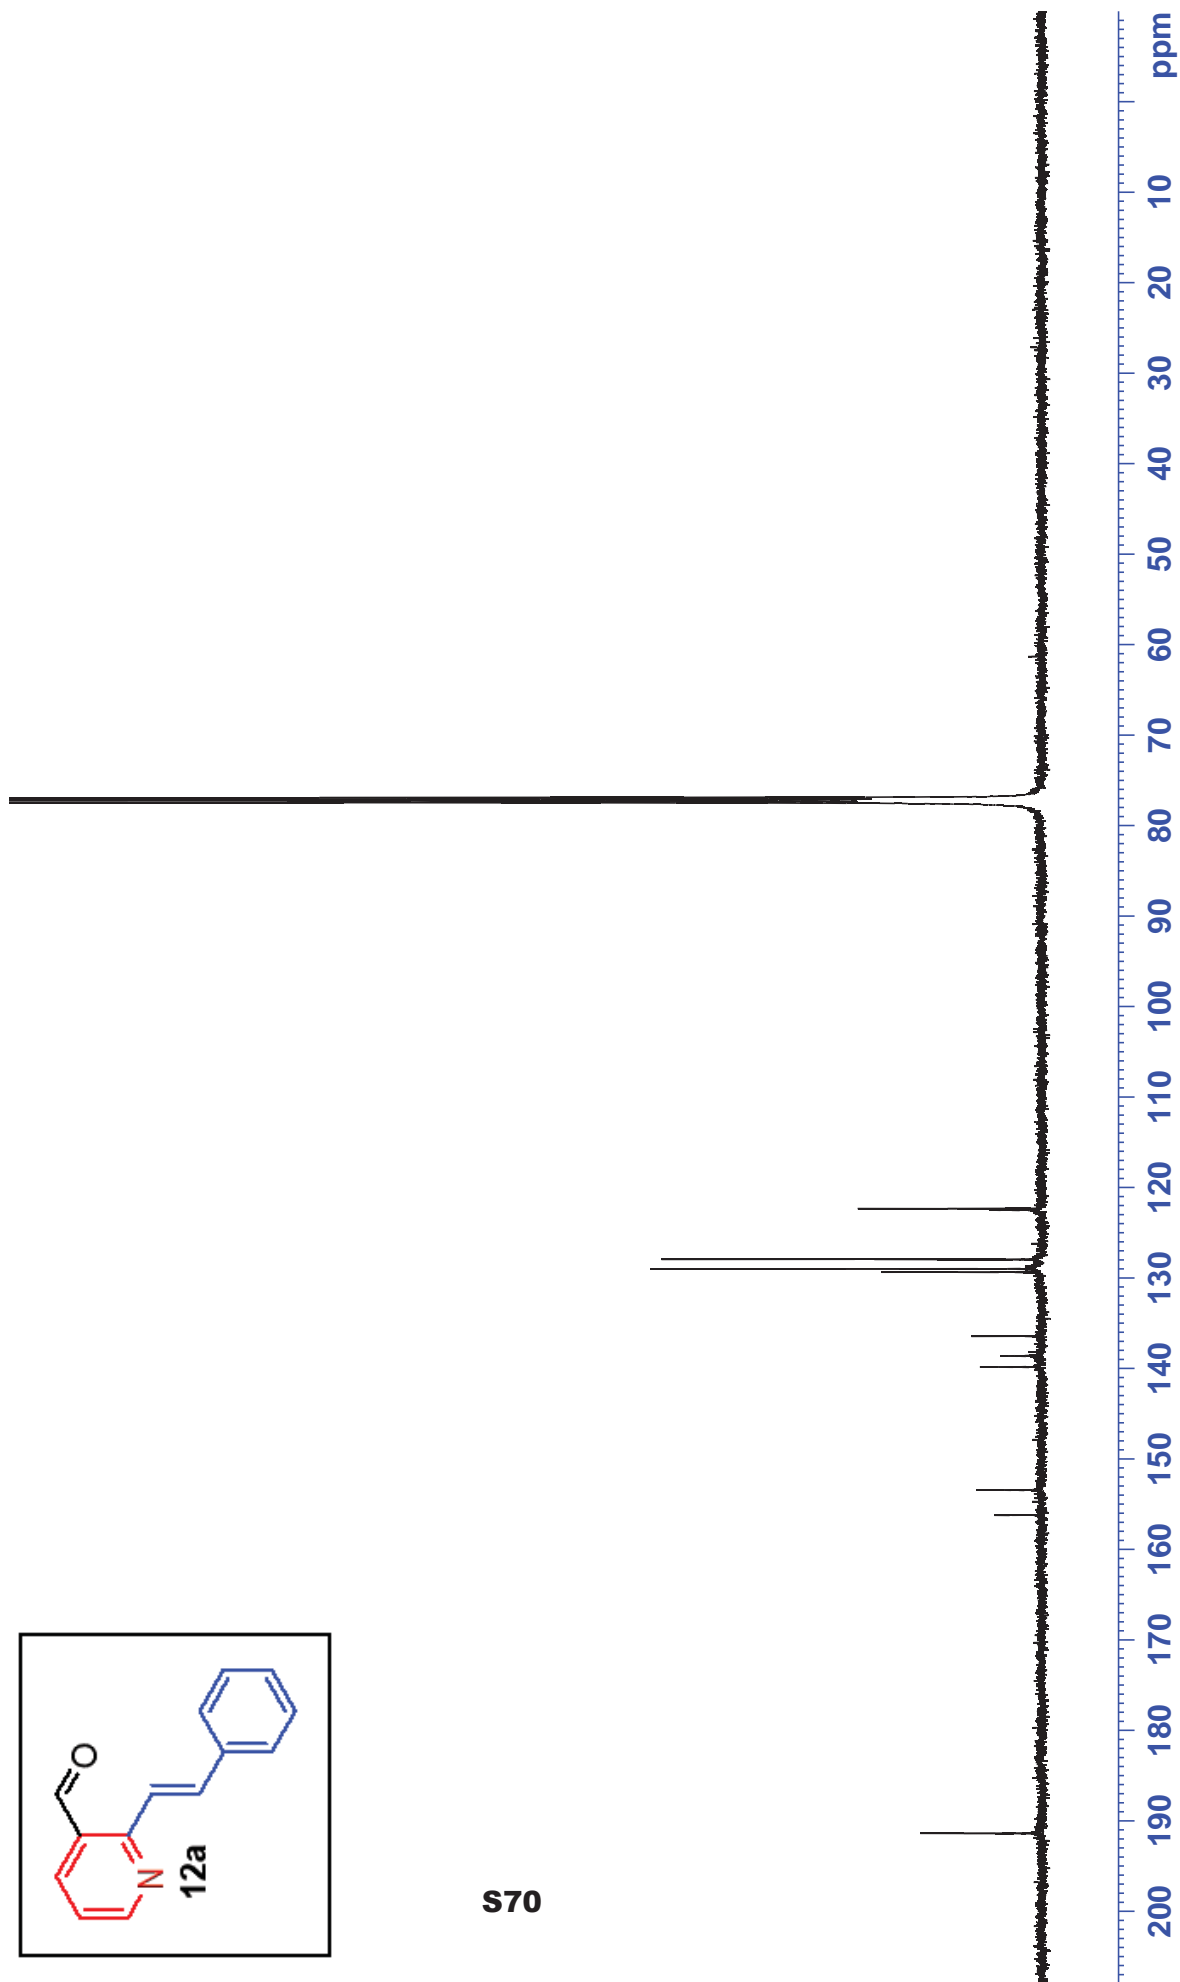

MOI-FGF23-A-115 (3)  
RCHO of MD-3-A54

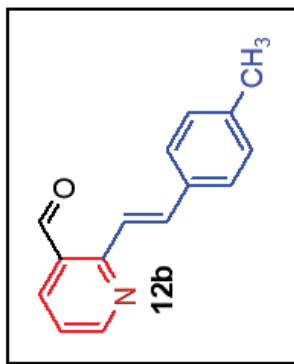

S71

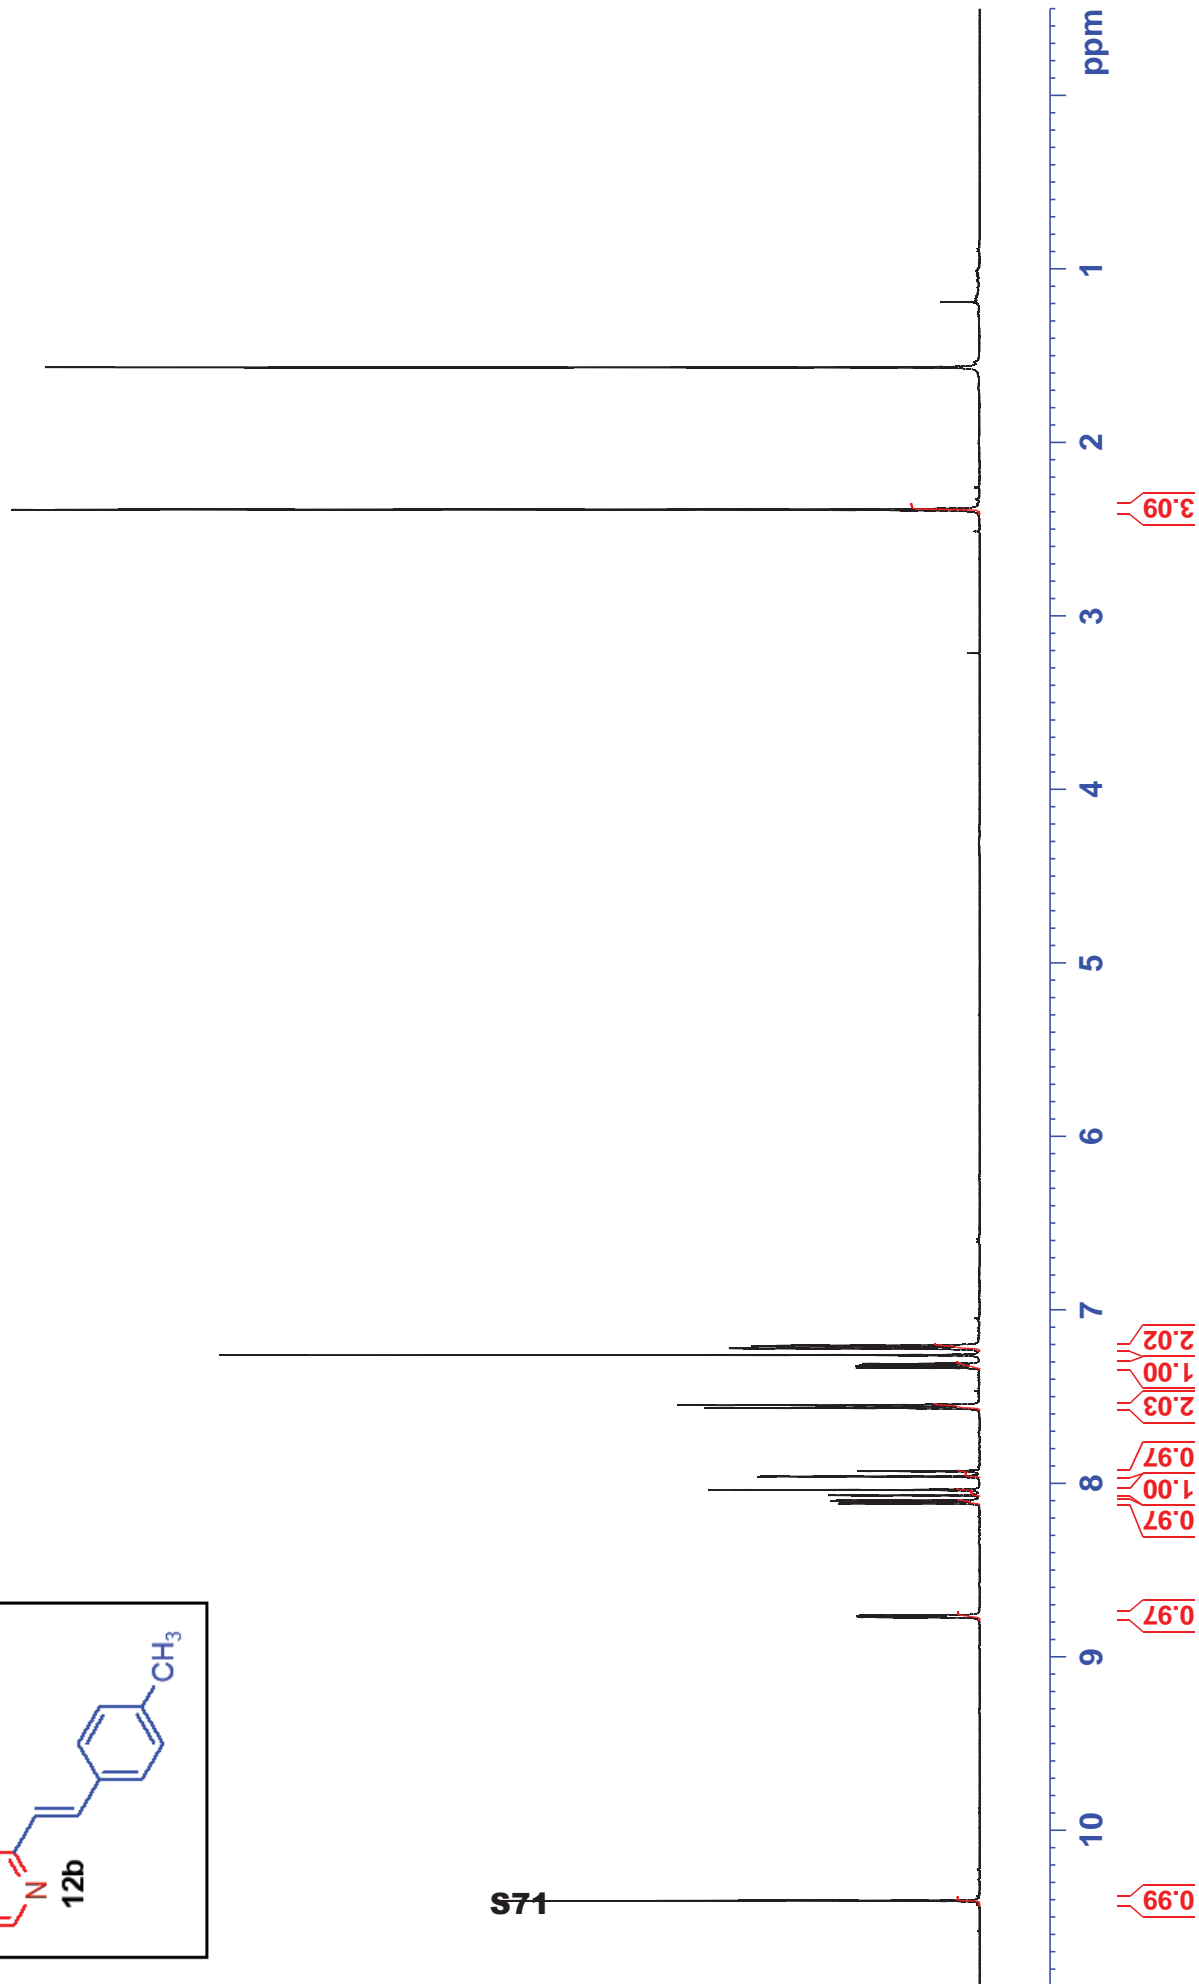

MOI-FGF23-A-115(3)  
RCHO of MD-3-A54

191.1

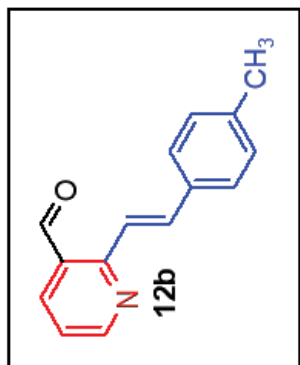

156.56  
153.61

139.52  
138.33  
133.73  
129.70  
127.86  
127.76  
122.07  
121.65

21.57

S72

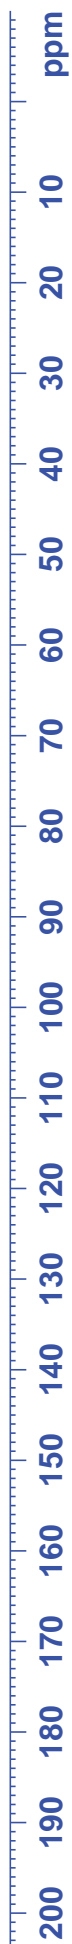

MOI-FGF23-A-117 (3)  
RCHO of MD-3-A55

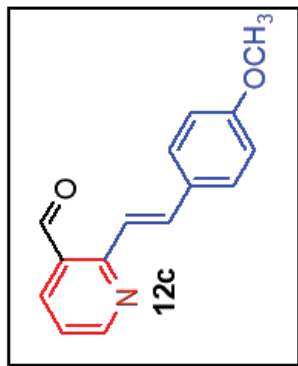

S73

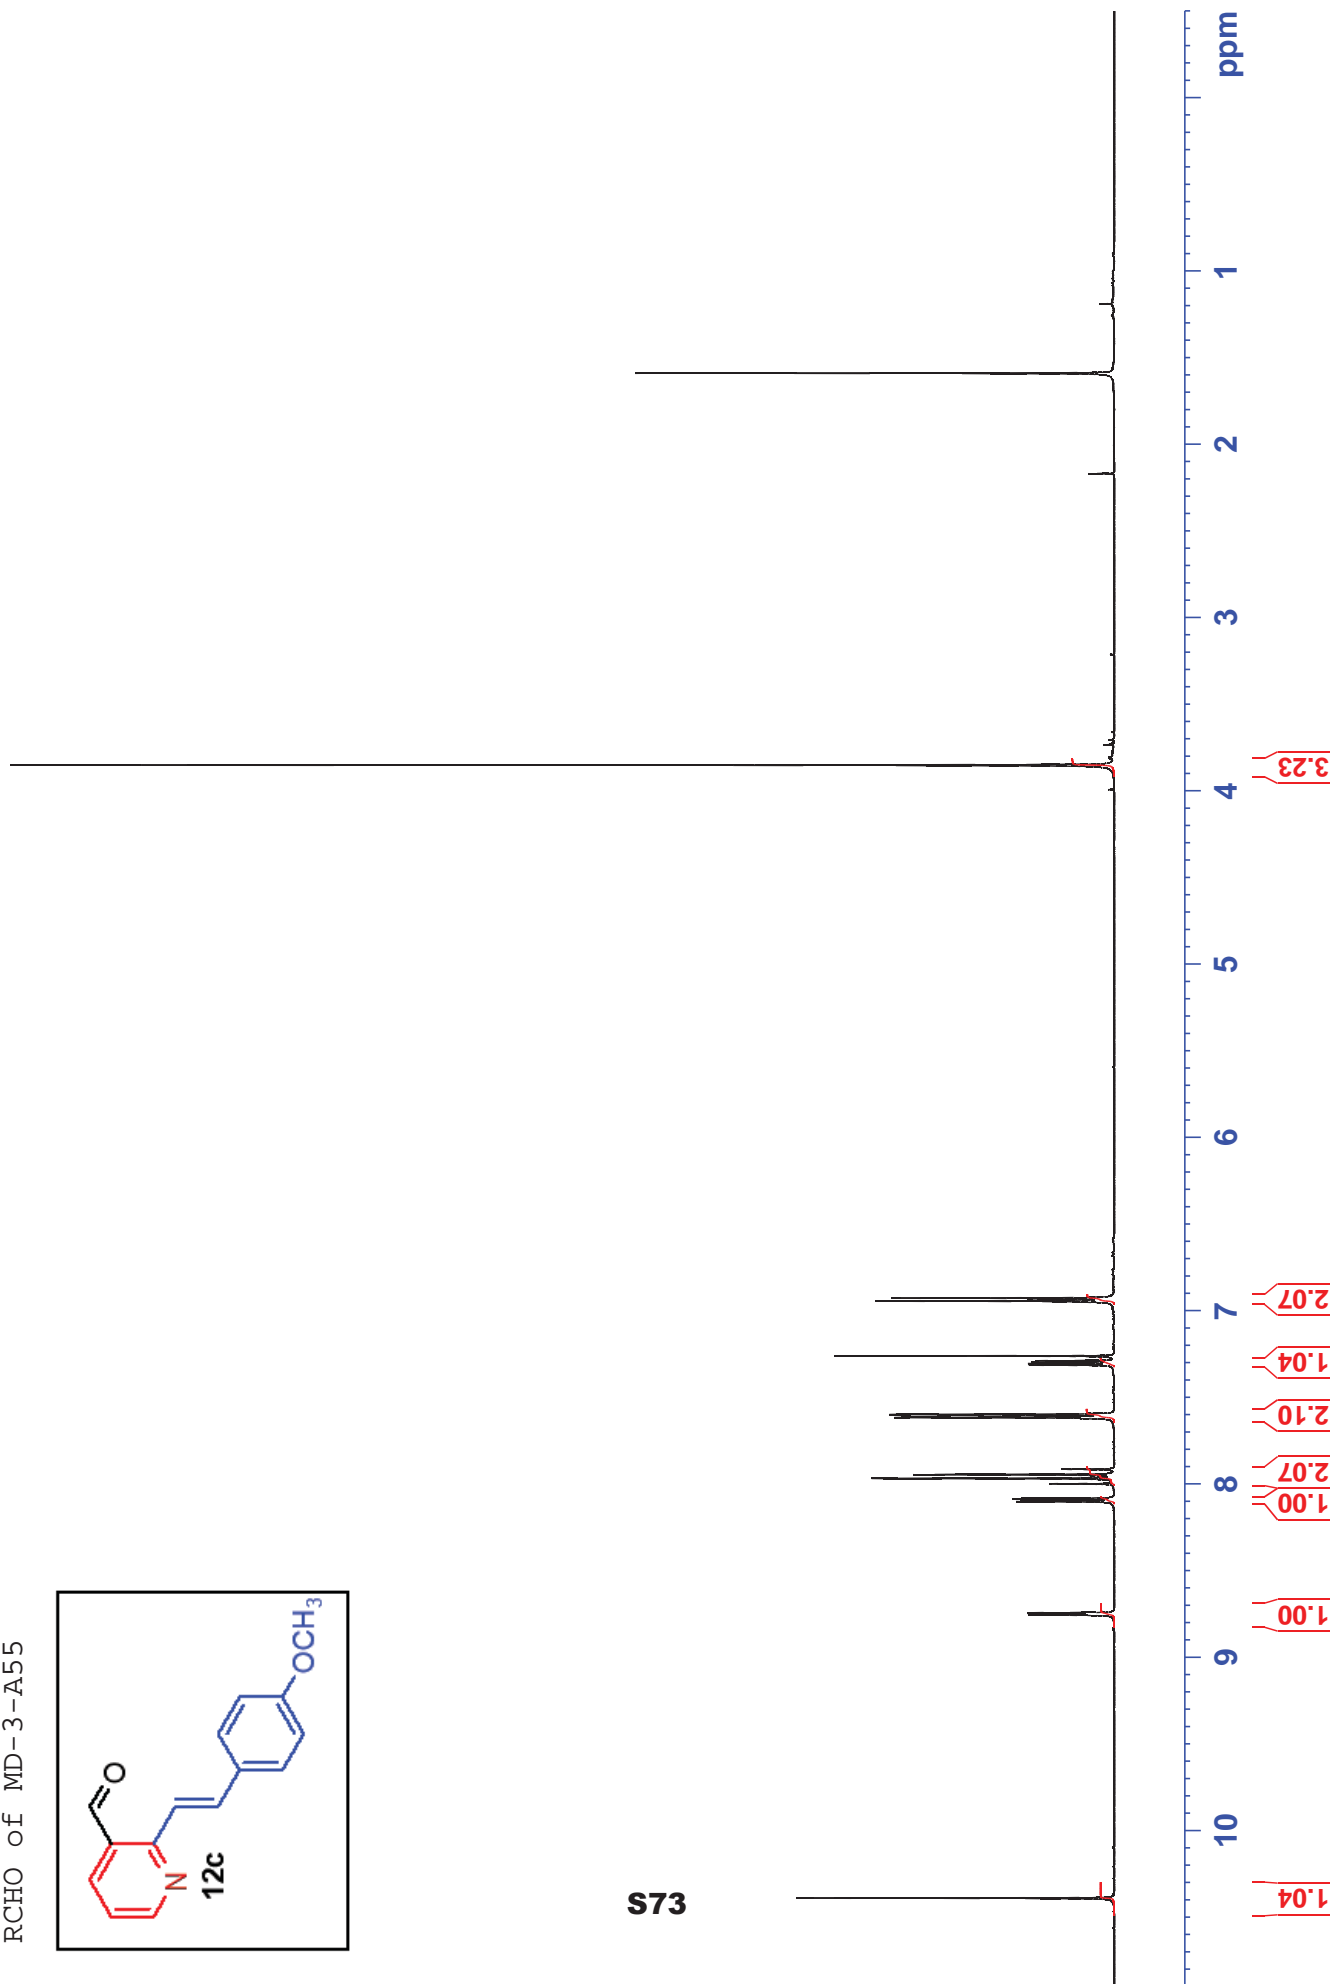

MOI-FGF23-A-117(3)  
RCHO of MD-3-A55

191.66  
160.67  
156.69  
153.58  
139.65  
137.95  
129.38  
129.29  
127.55  
121.82  
120.44  
114.42  
55.50

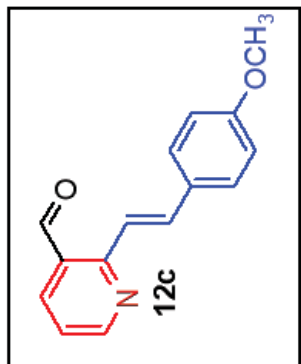

S74

200 190 180 170 160 150 140 130 120 110 100 90 80 70 60 50 40 30 20 10 ppm

MOI-FGF23-A-57 (2)  
RCHO of MD-3-A56

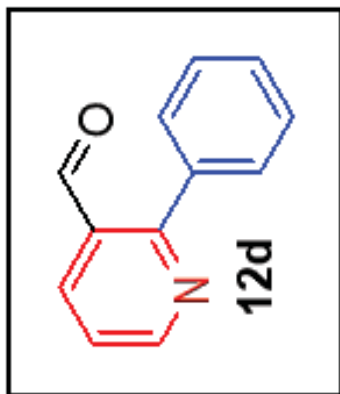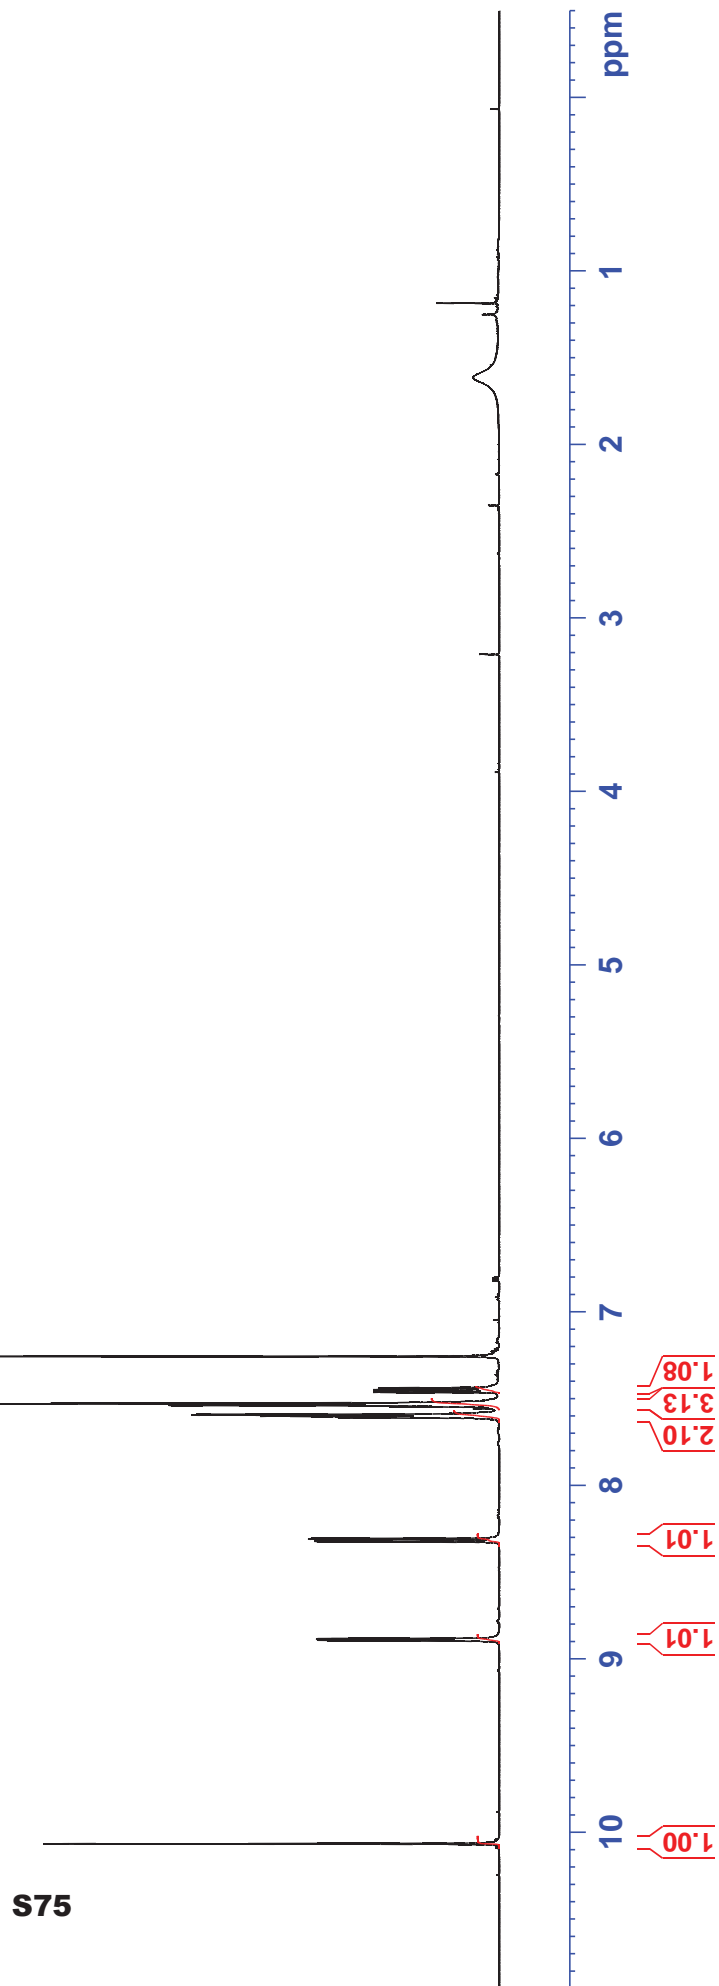

MOI-FGF23-A-57(3)  
RCHO Qf MD-3-A56

137.16  
136.08  
130.54  
129.77  
129.69  
128.80  
122.70

162.40  
153.59

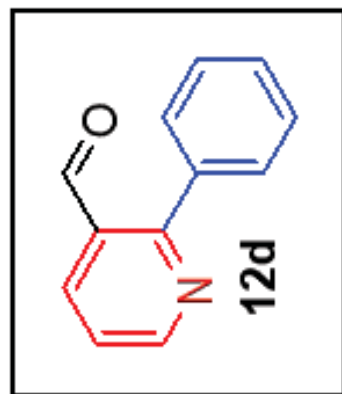

19

S76

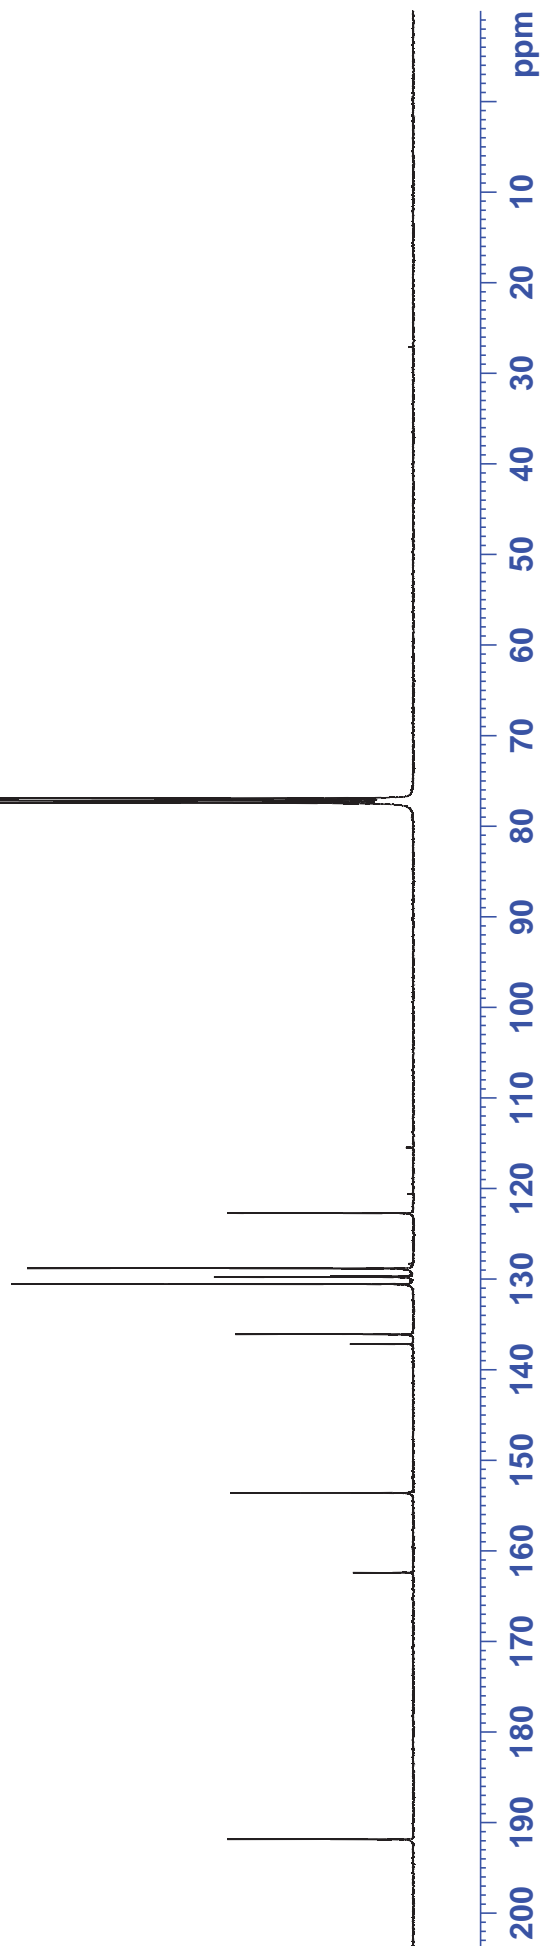



MOI-FGF23-A-101 (4)  
RCHO of MD-3-A57

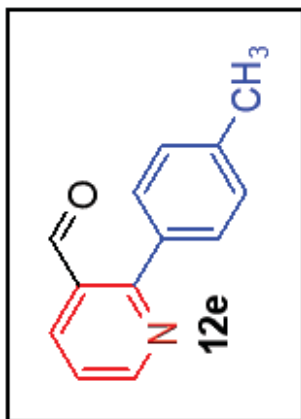

S77

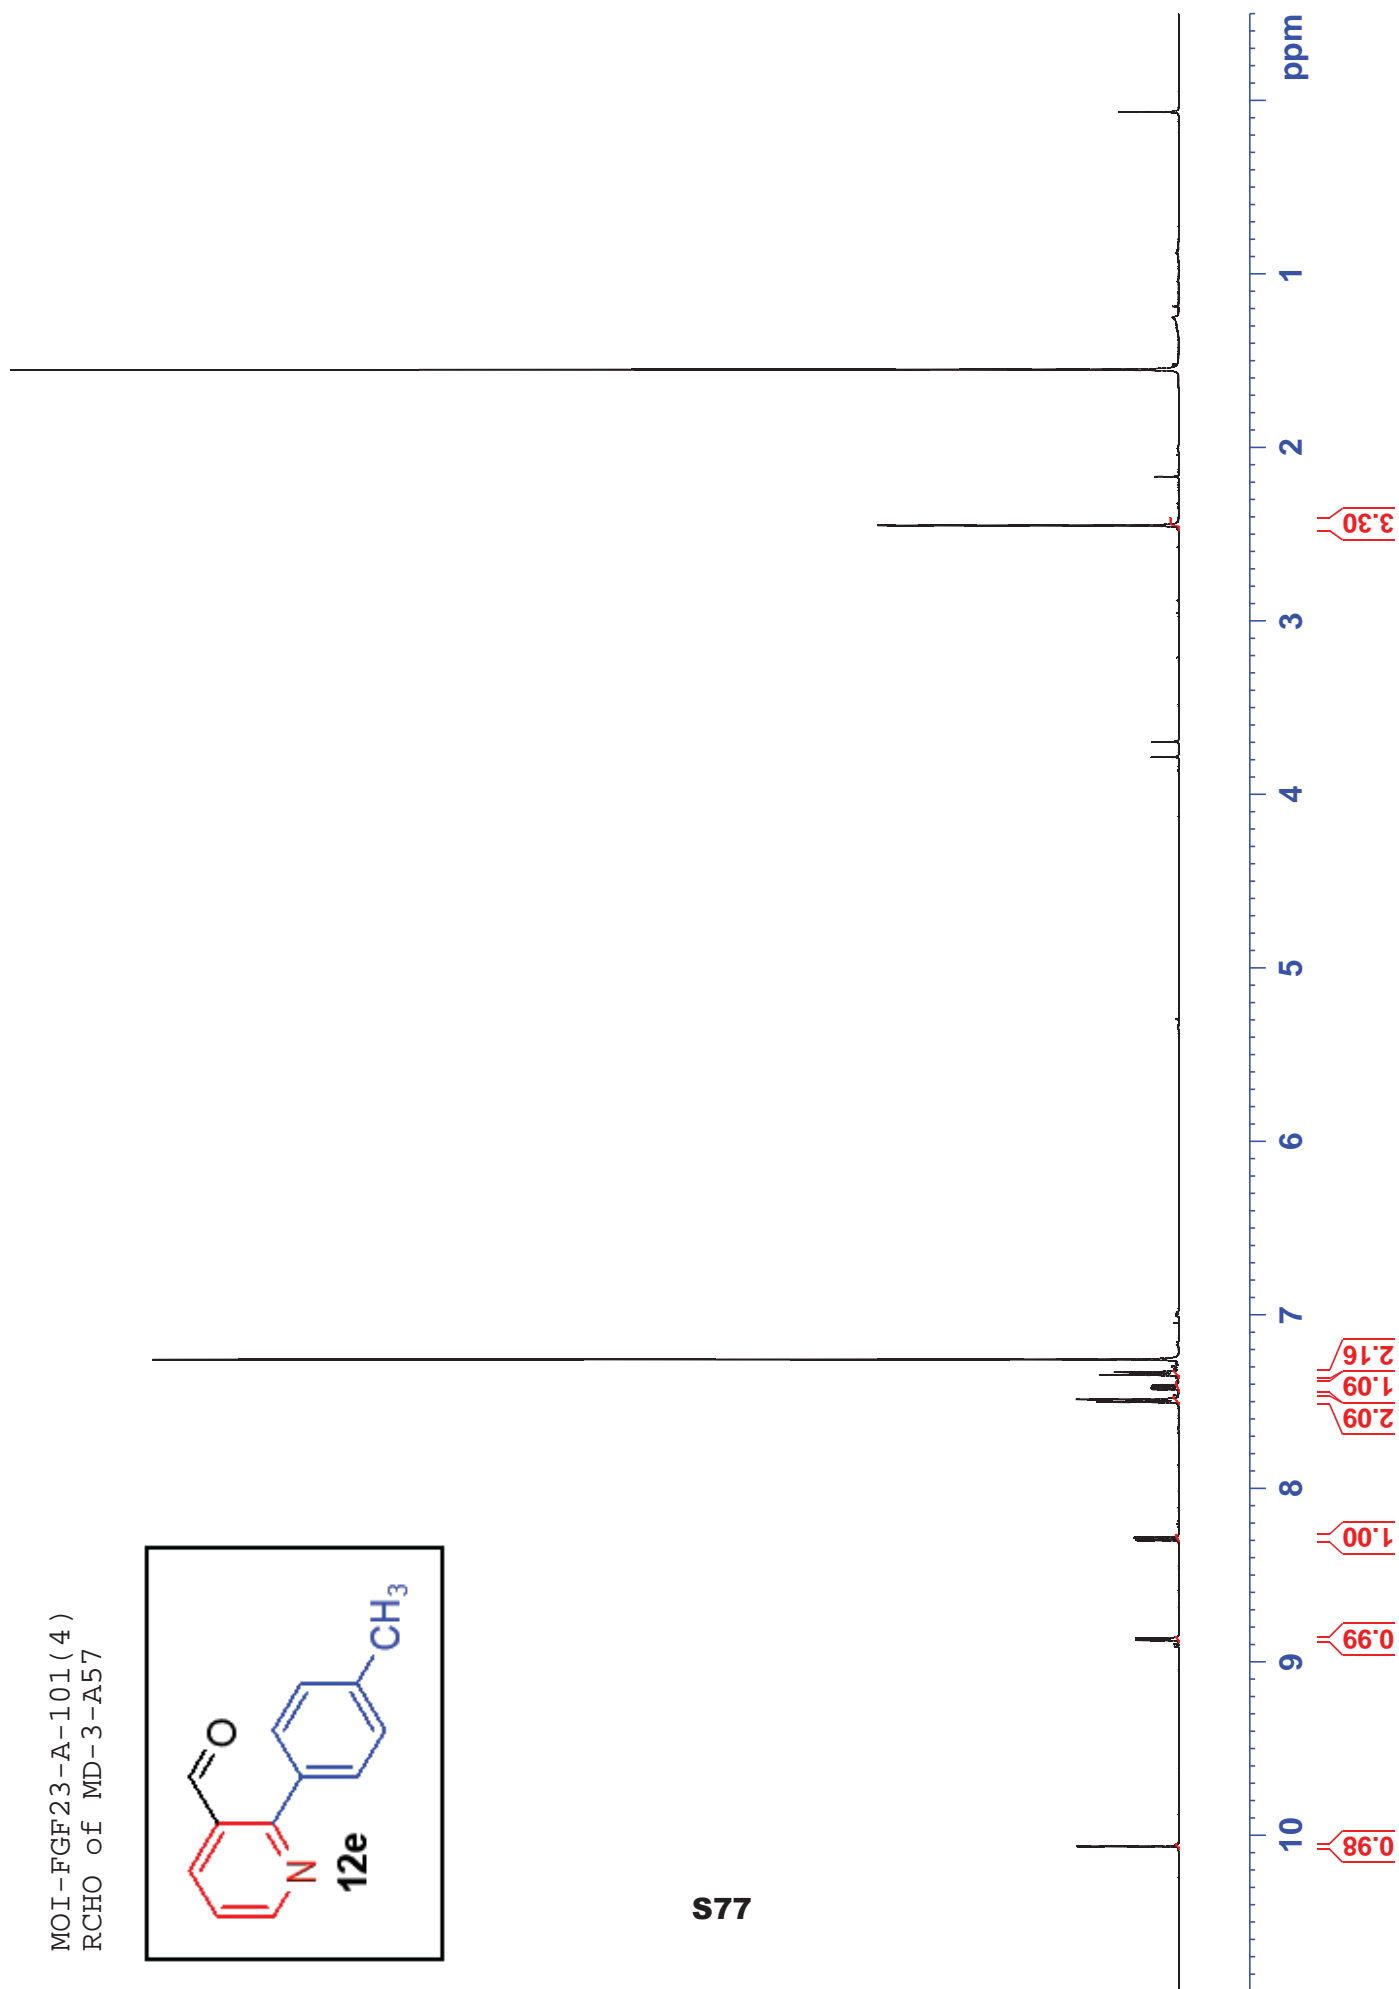

MOI-FGF23-A-101 (4)  
RCHO of MD-3-A57

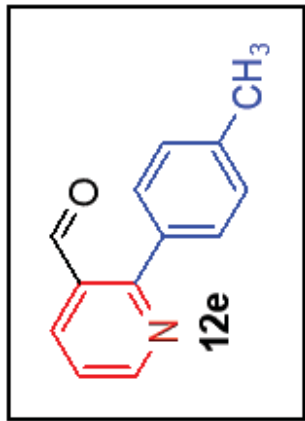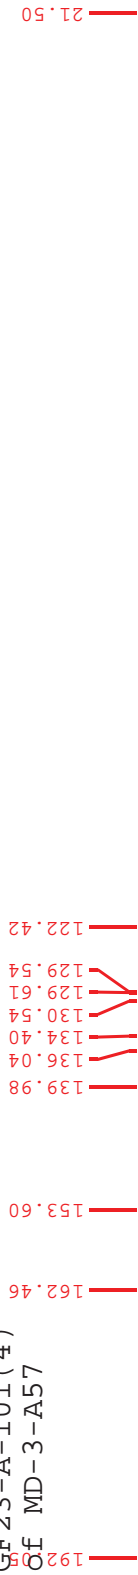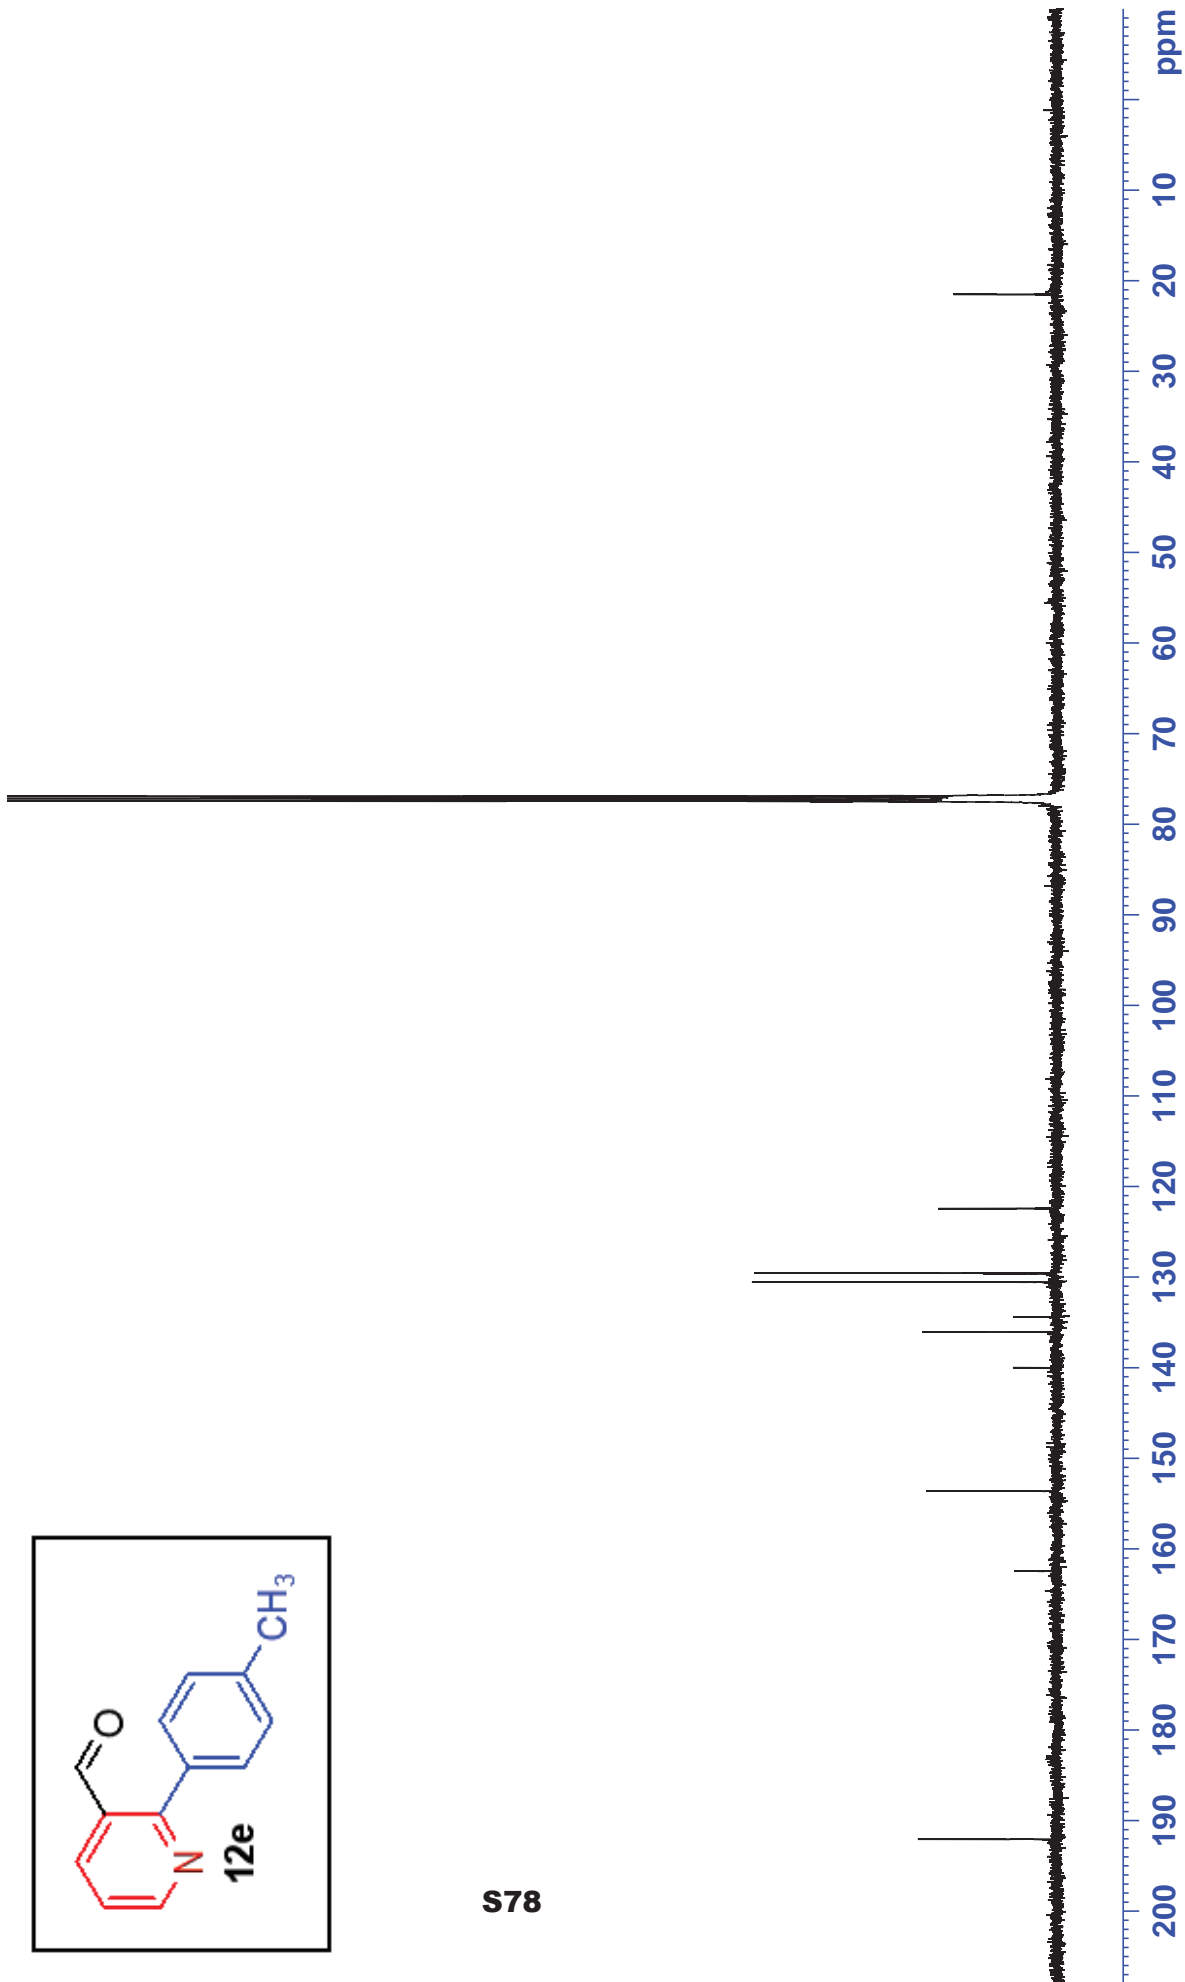

MOI-FGF23-A-61(3)  
RCHO of MD-3-A58

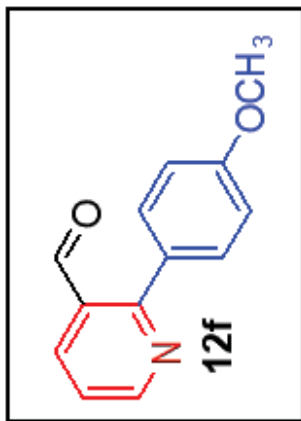

S79

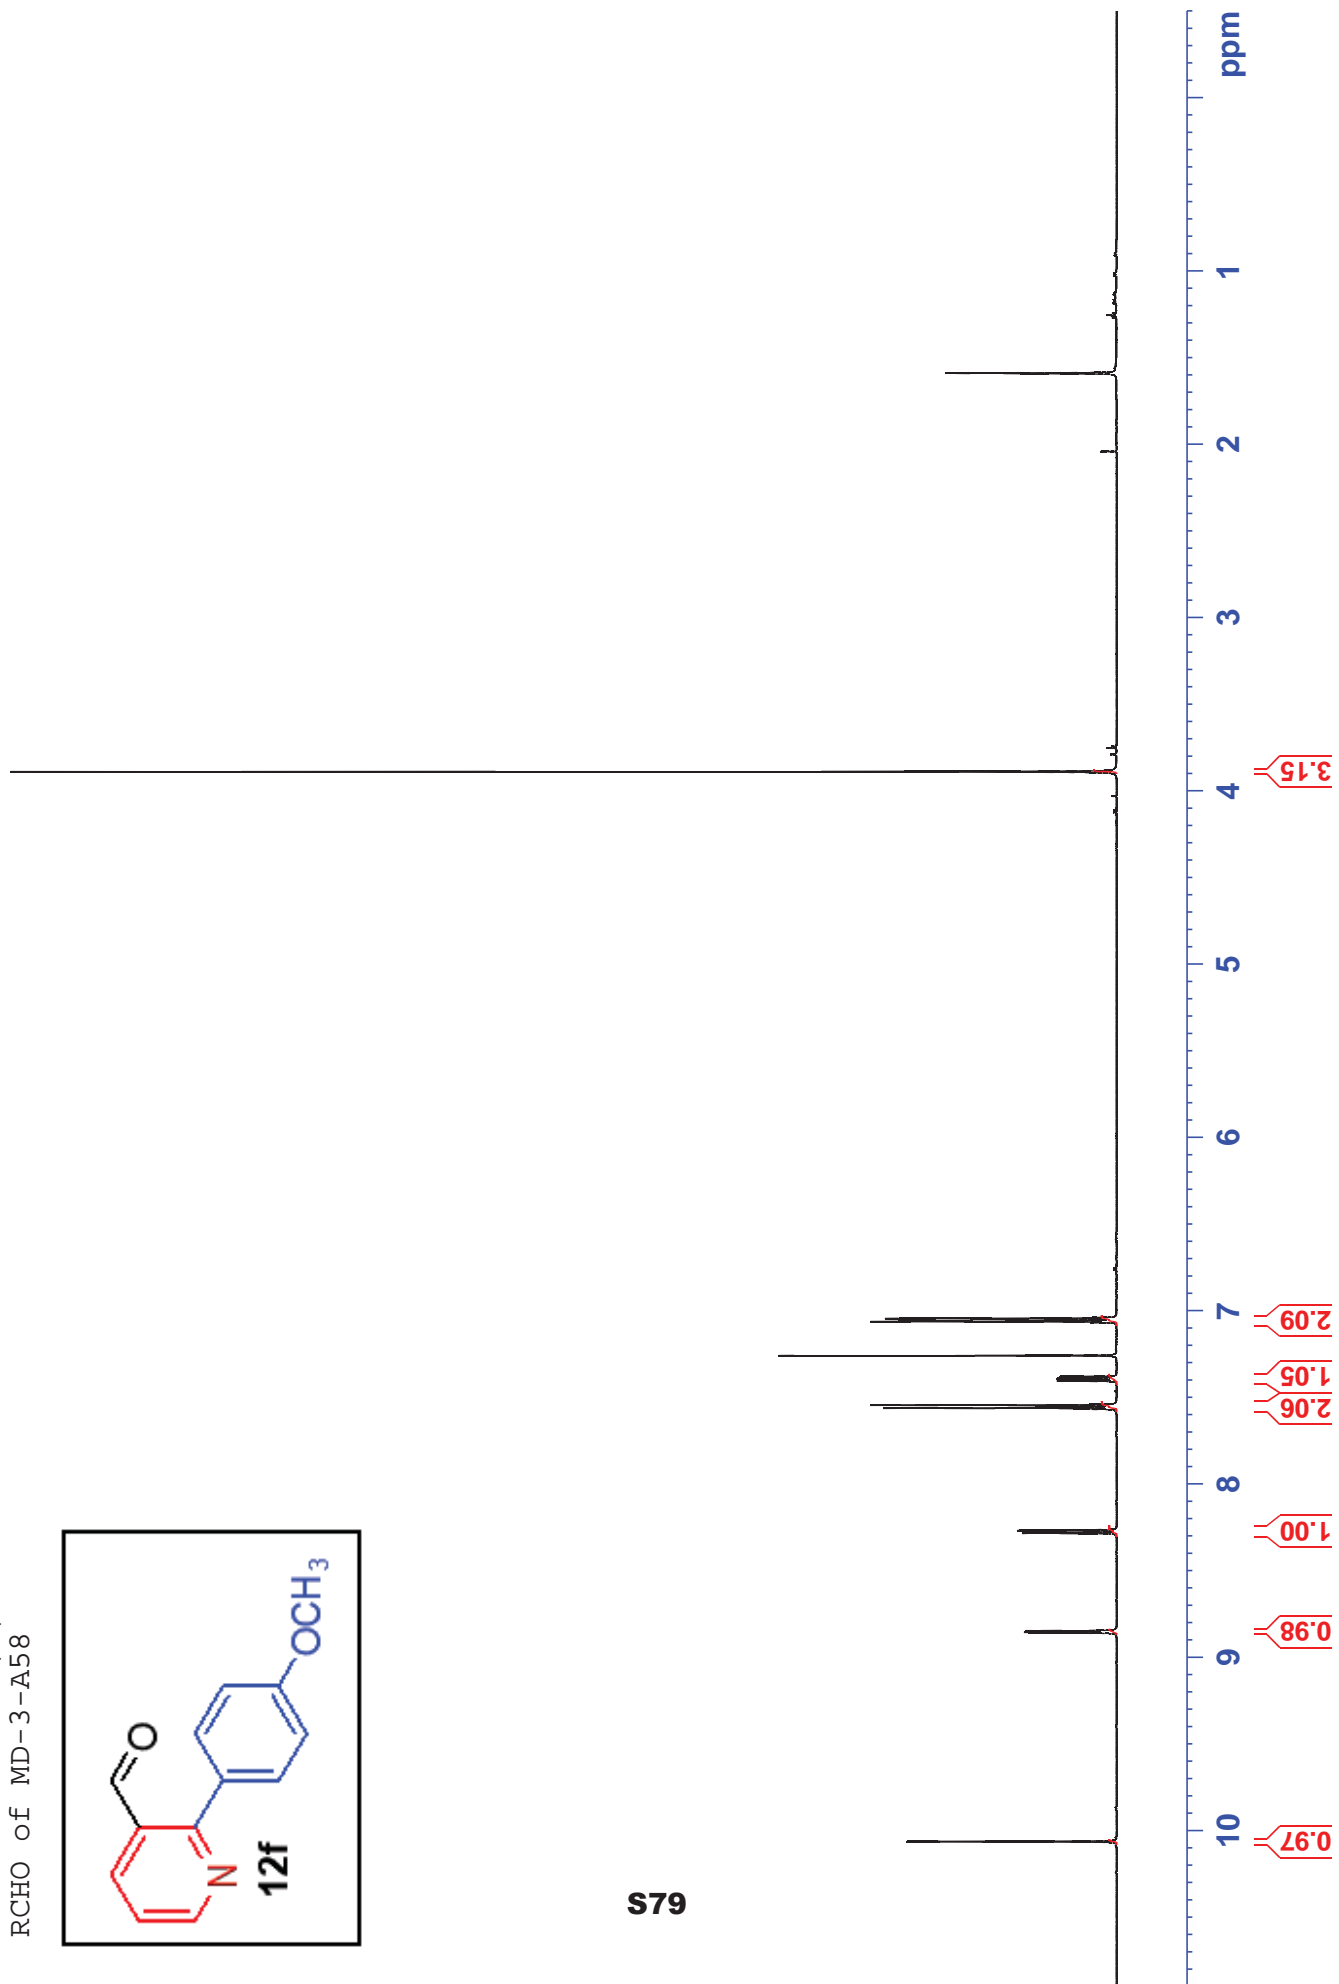

MOI-A-61(3)  
RCHO 0F MD-3-A58

192.08

161.98  
161.11

153.56

136.13

132.08

129.71

129.44

122.15

114.33

55.61

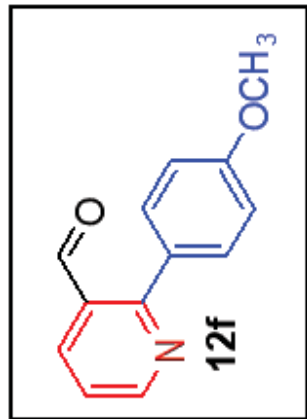

12f

580

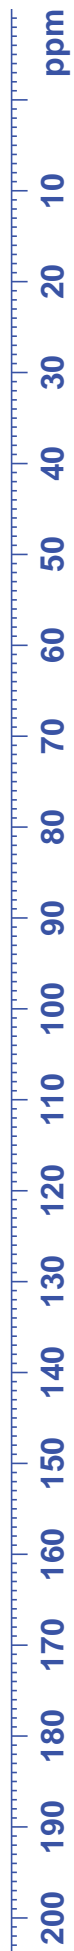

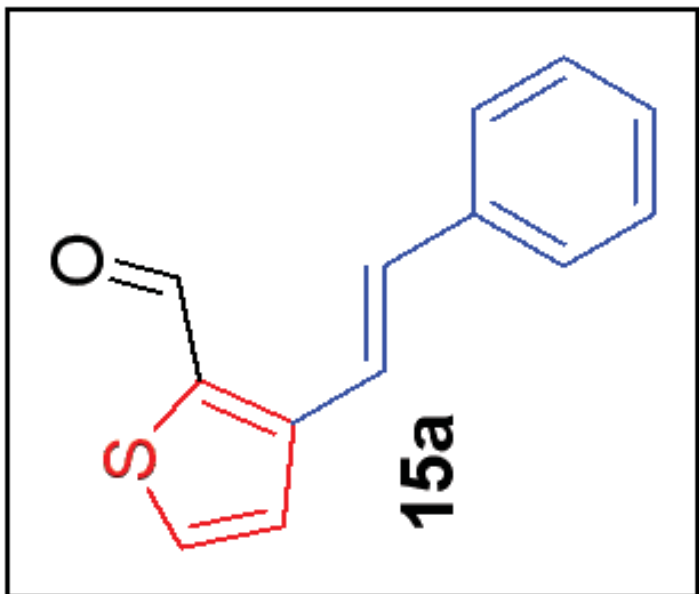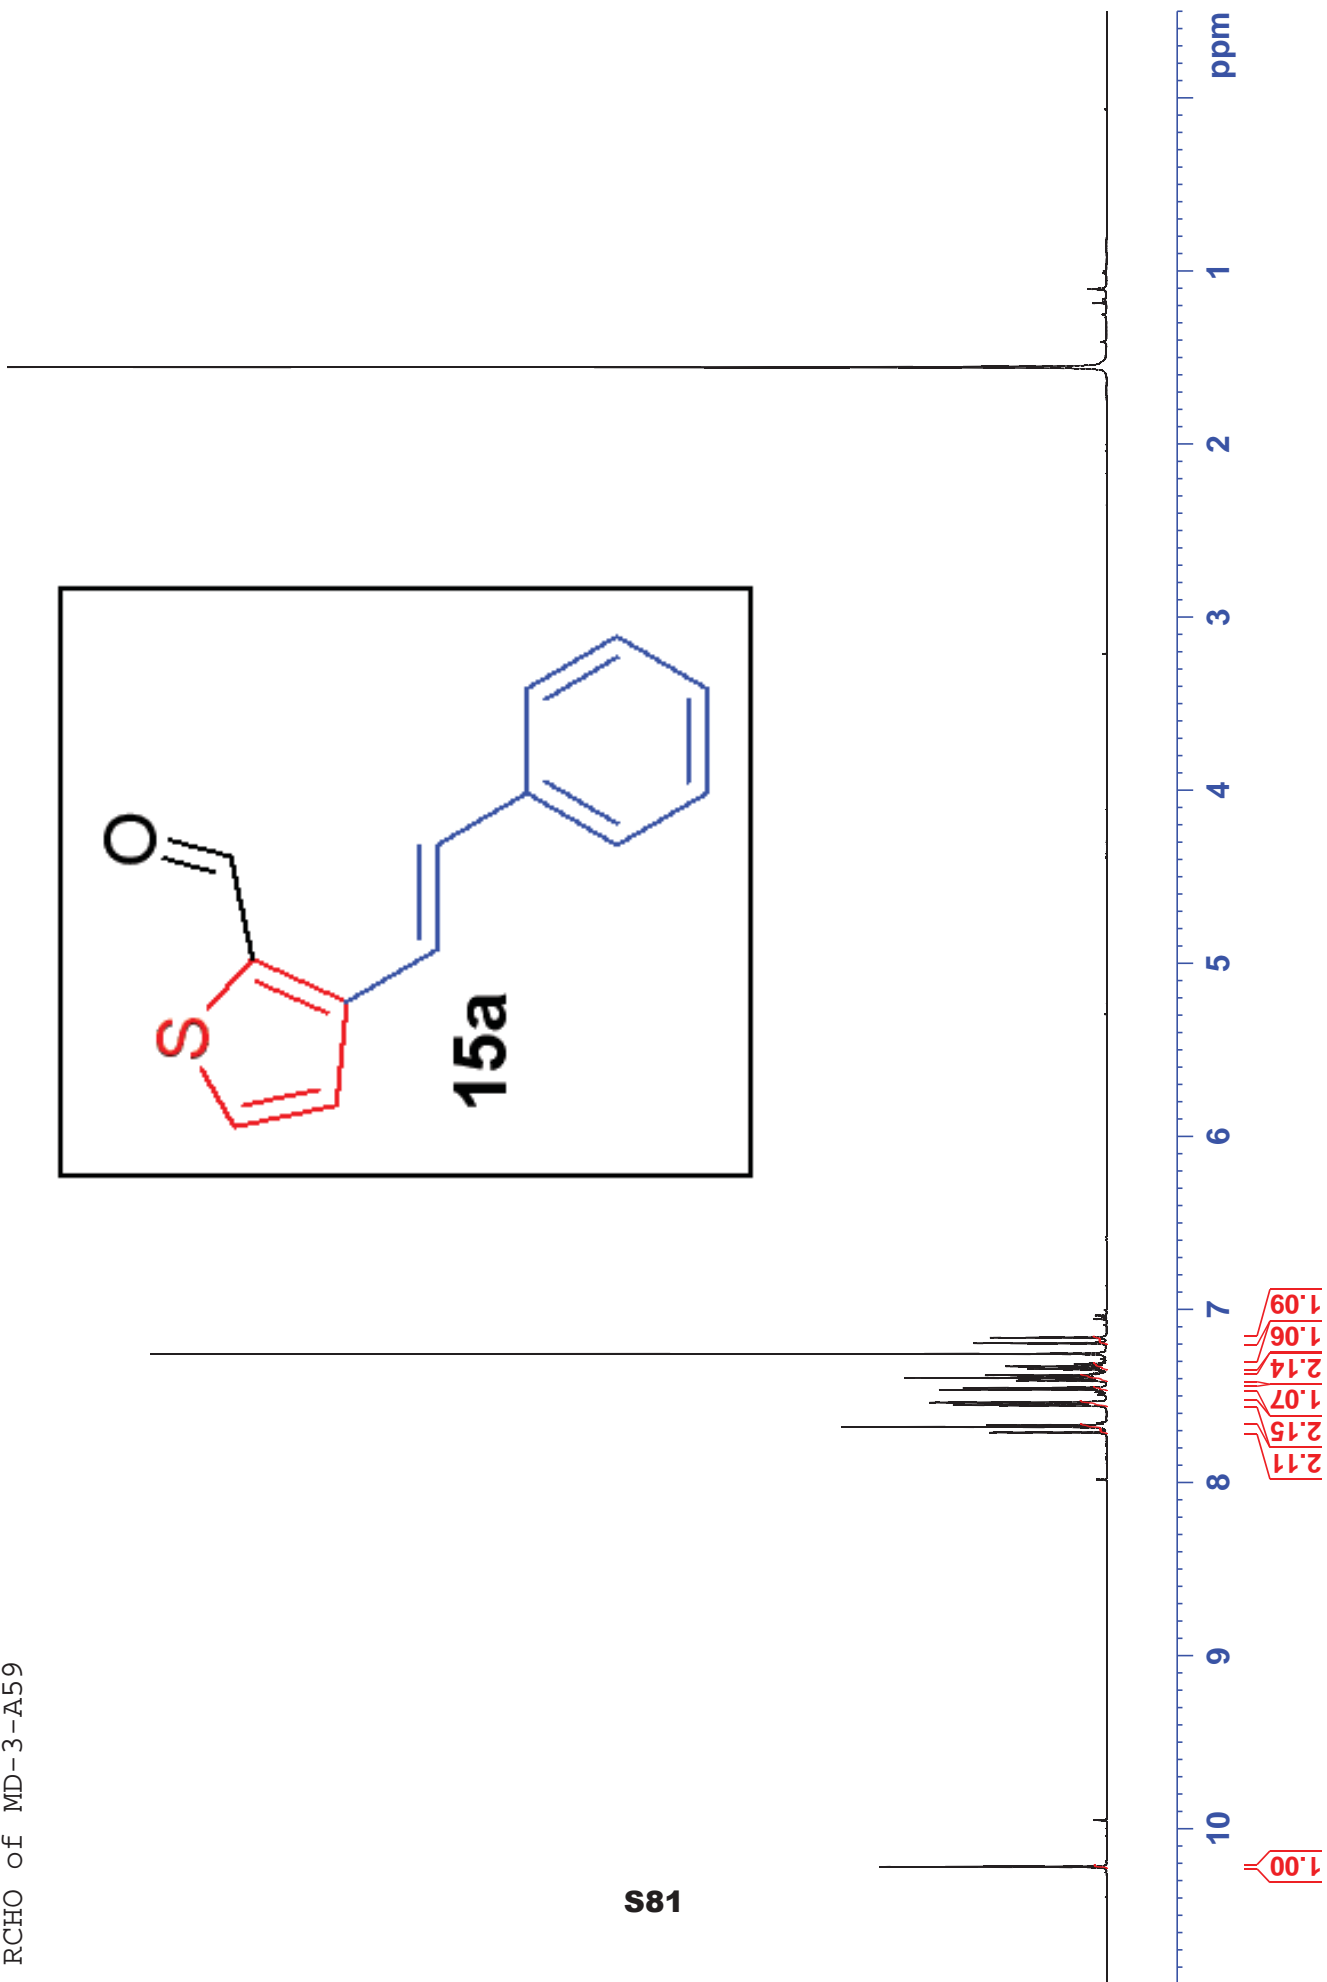

MOI-FGF23-A<sub>5</sub>-77(5)  
RCHO of MD-3-A59

182.1  
146.88  
137.67  
136.40  
134.89  
134.52  
129.05  
128.96  
127.11  
126.94  
119.46

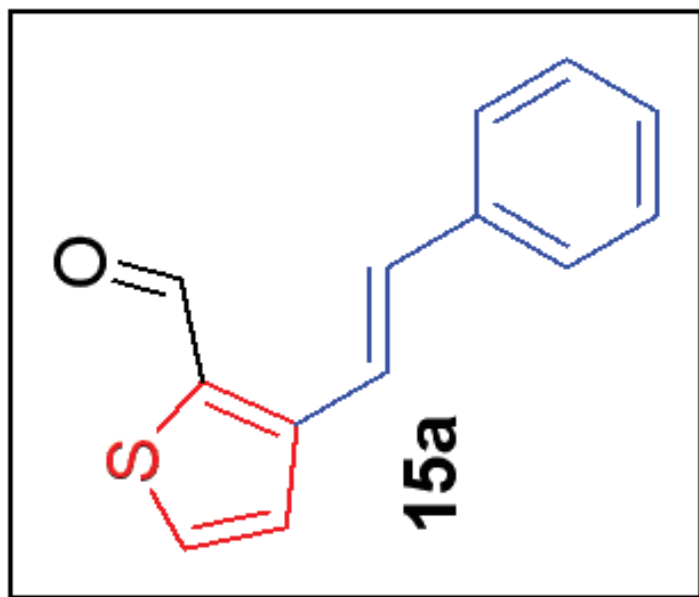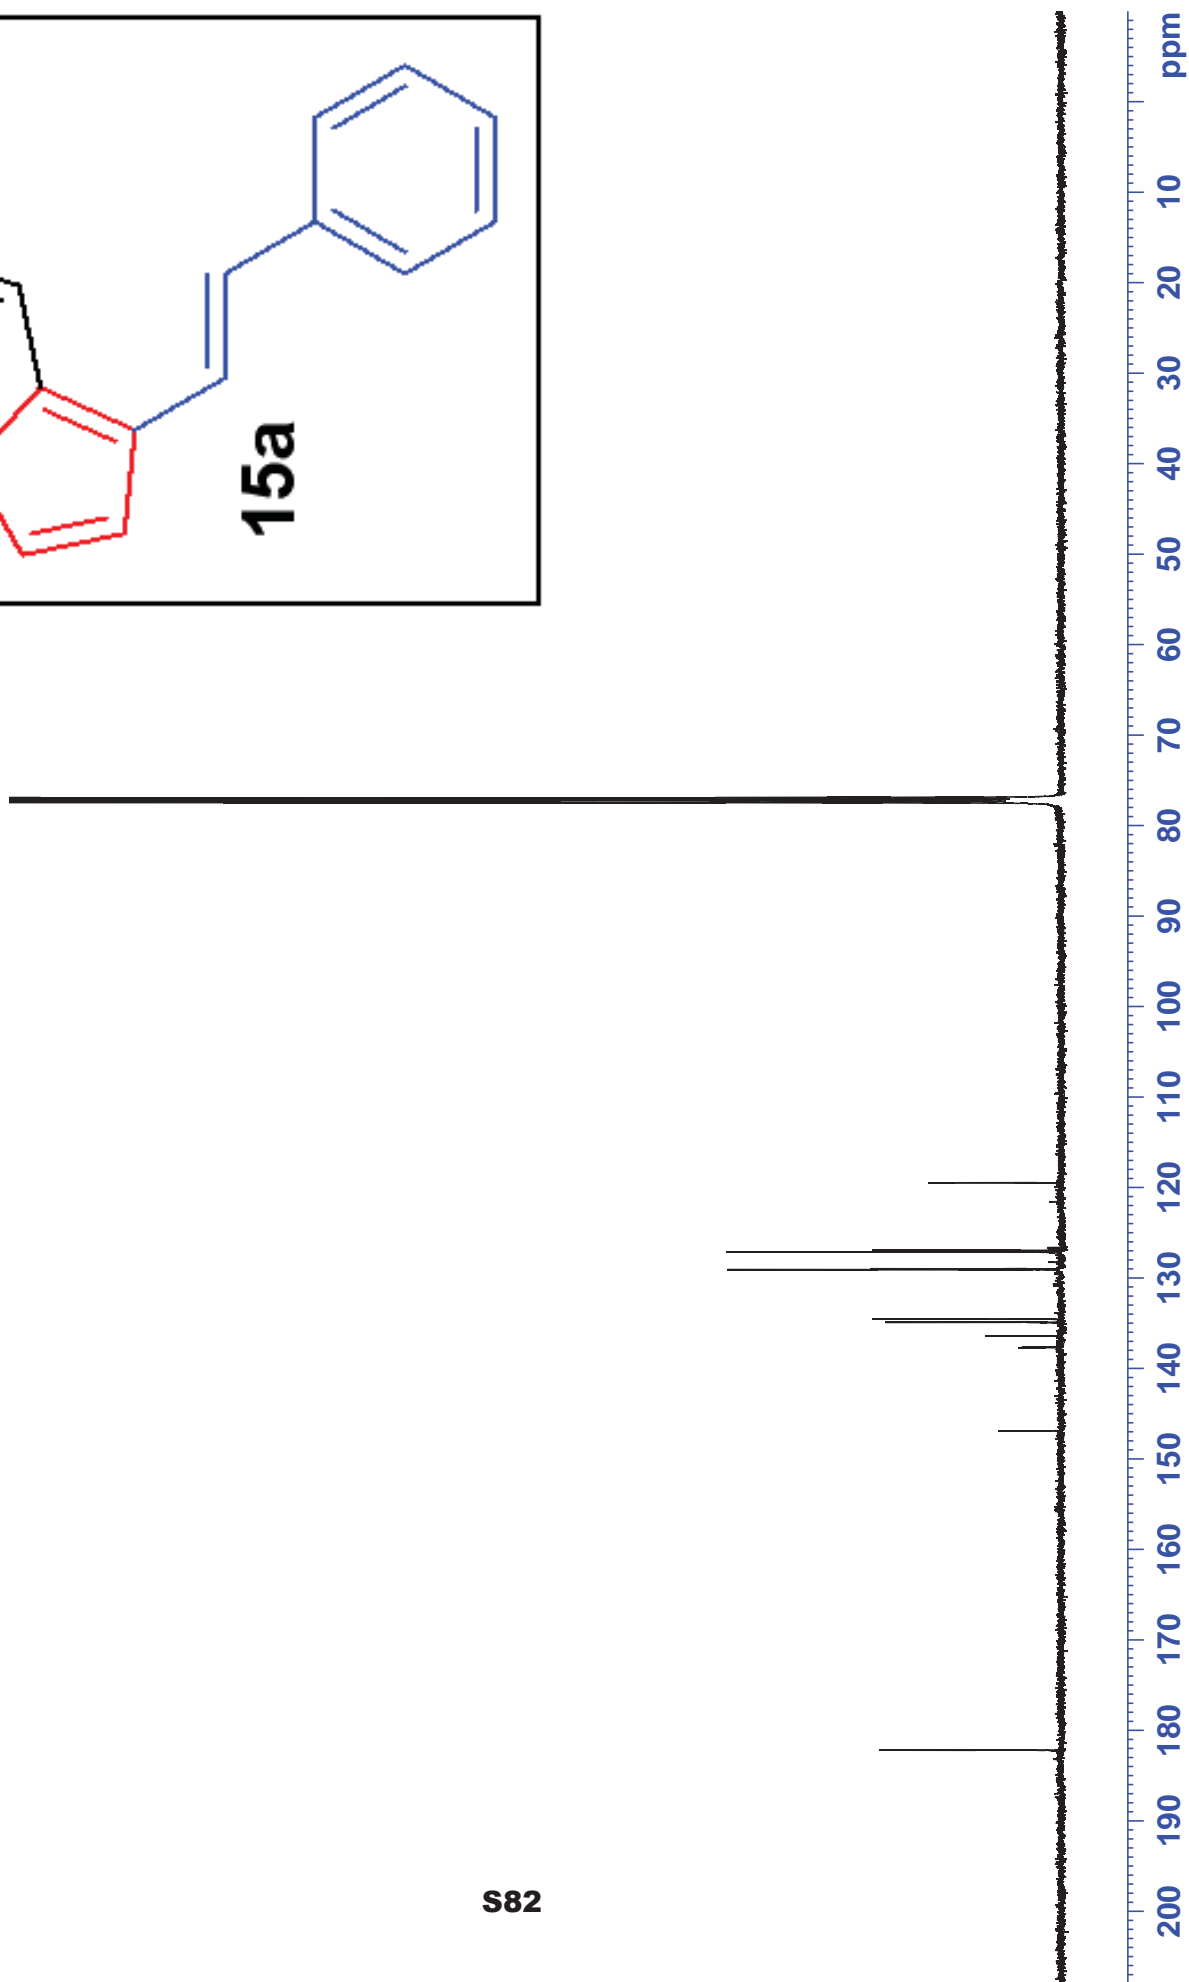

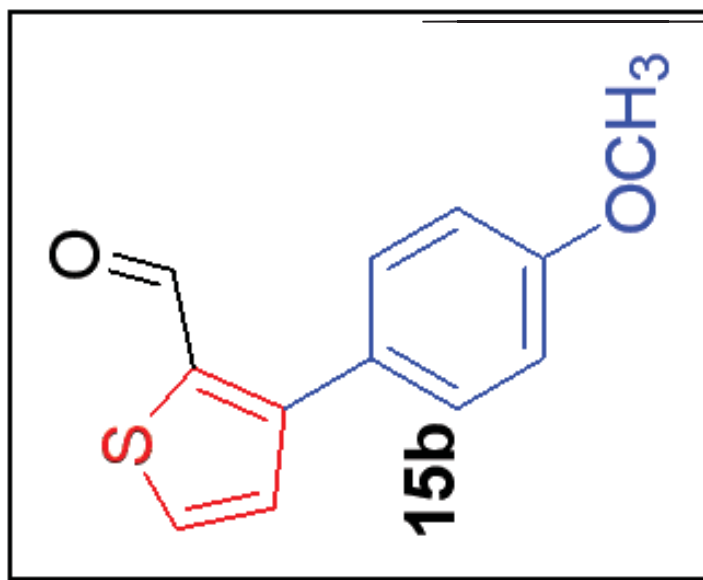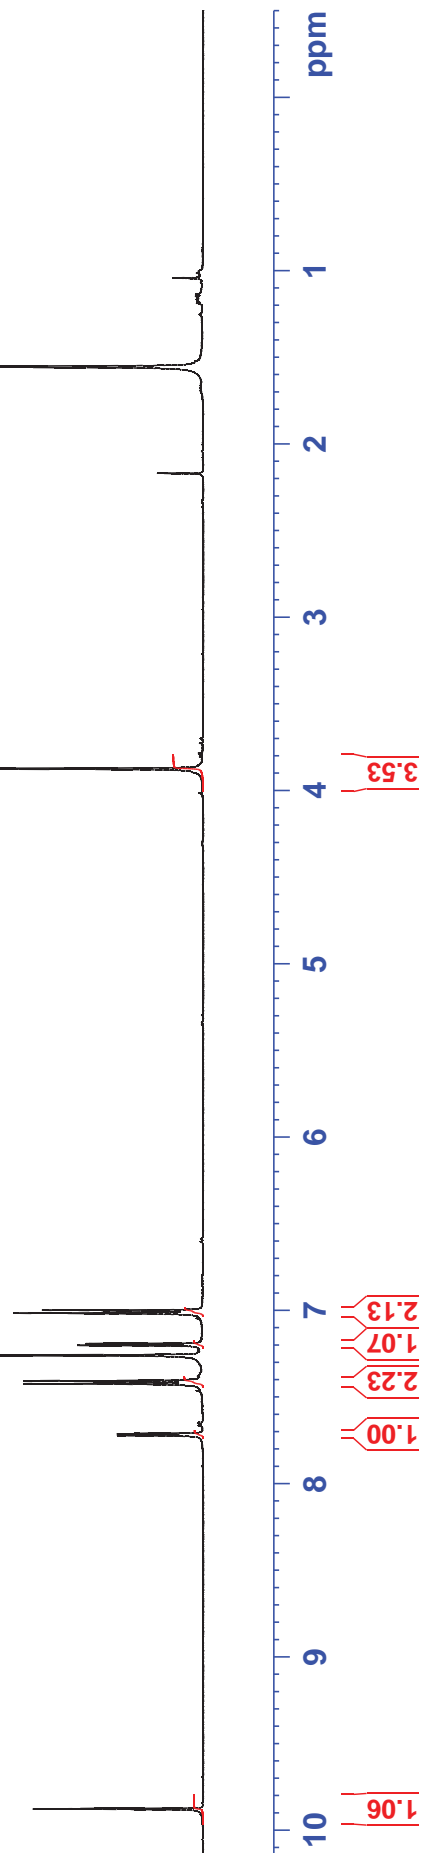

MOI-FGF23-A-107(3)  
RCHO of MD3-A67

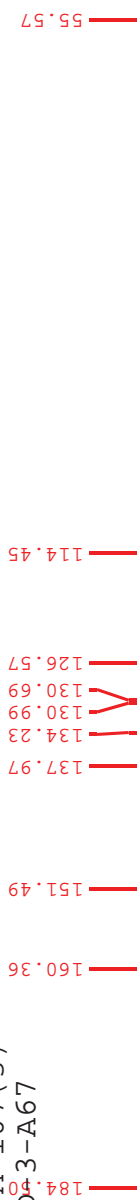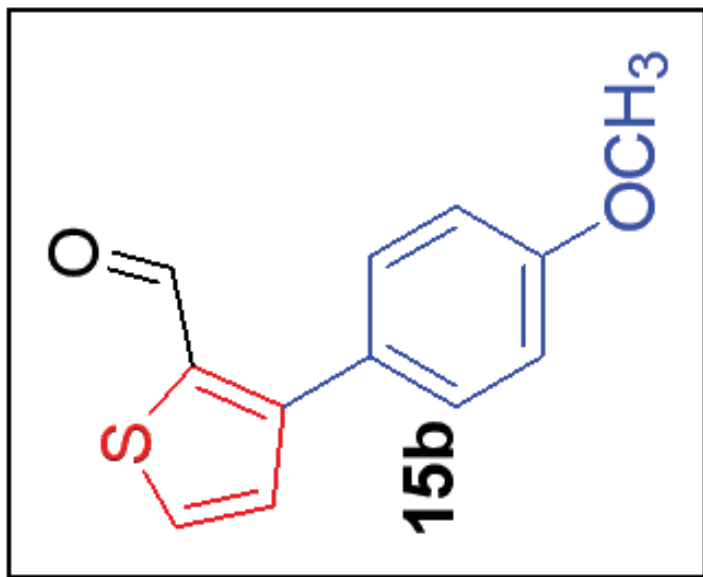

S84

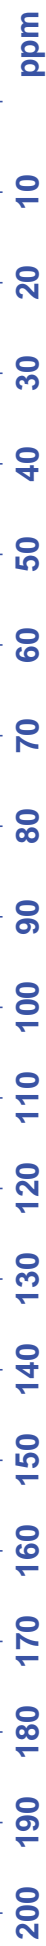



JWC-FGF23-A71 (2)  
MD-3

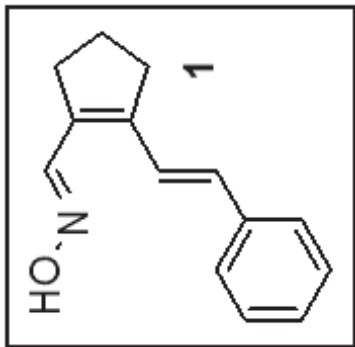

S85

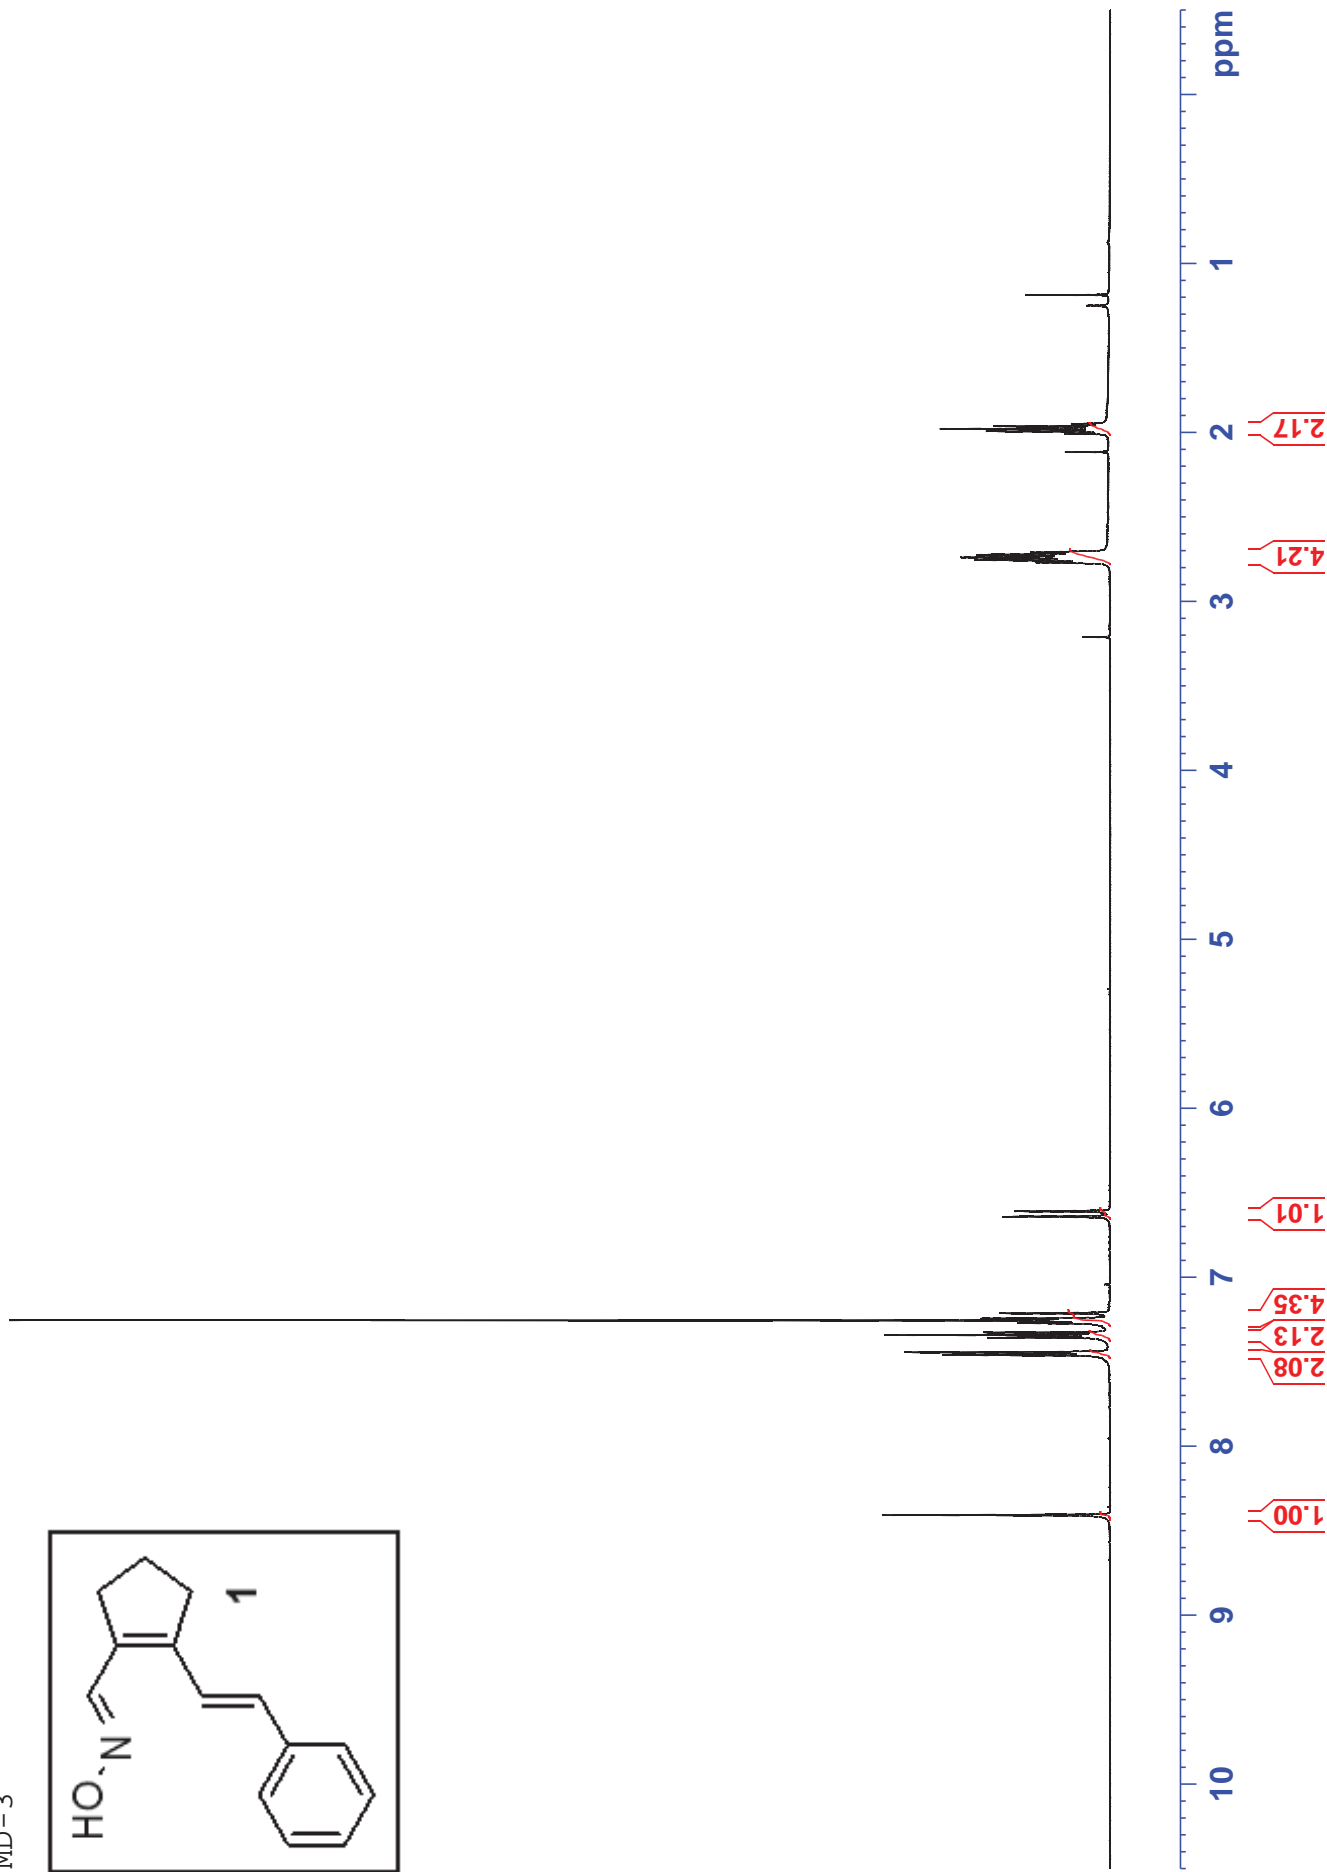

JWC-FGF23-A71 (2)  
MD-3

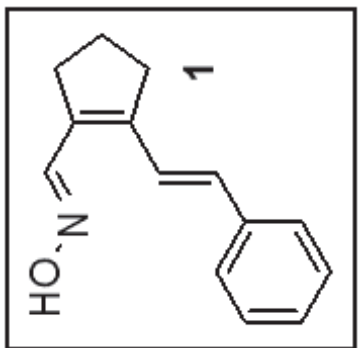

33.79  
32.90  
21.84

146.36  
145.78  
137.24  
133.47  
132.23  
128.89  
128.17  
126.79  
121.21

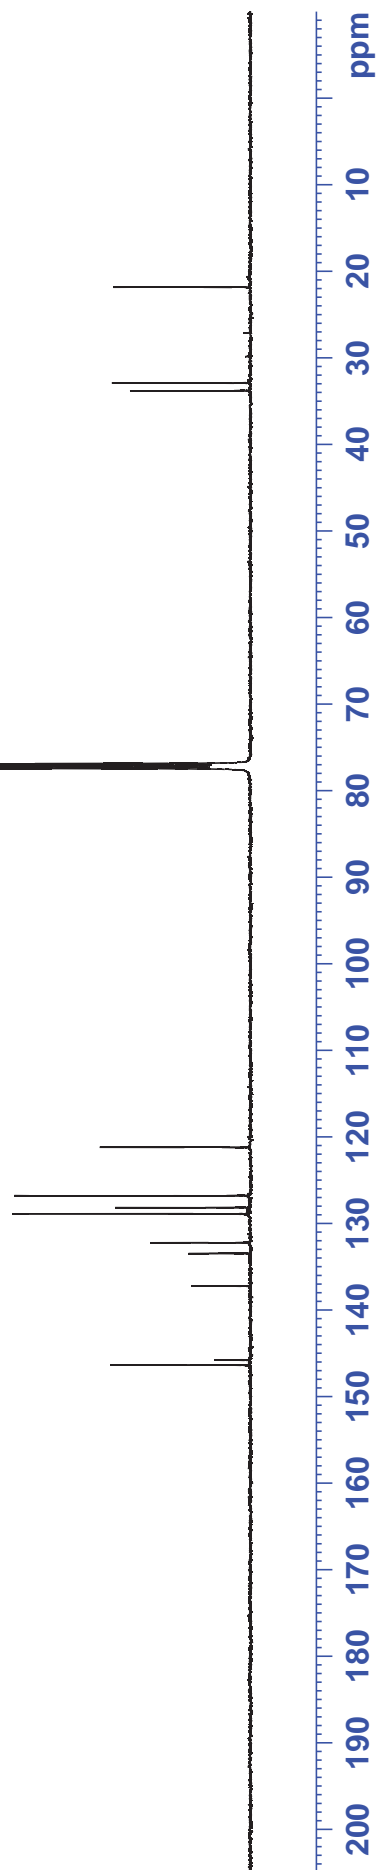

RPD-FGF23-A-35 (3)  
MD-3-A8

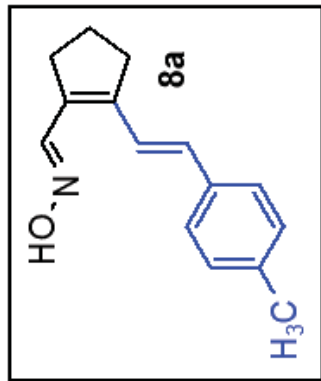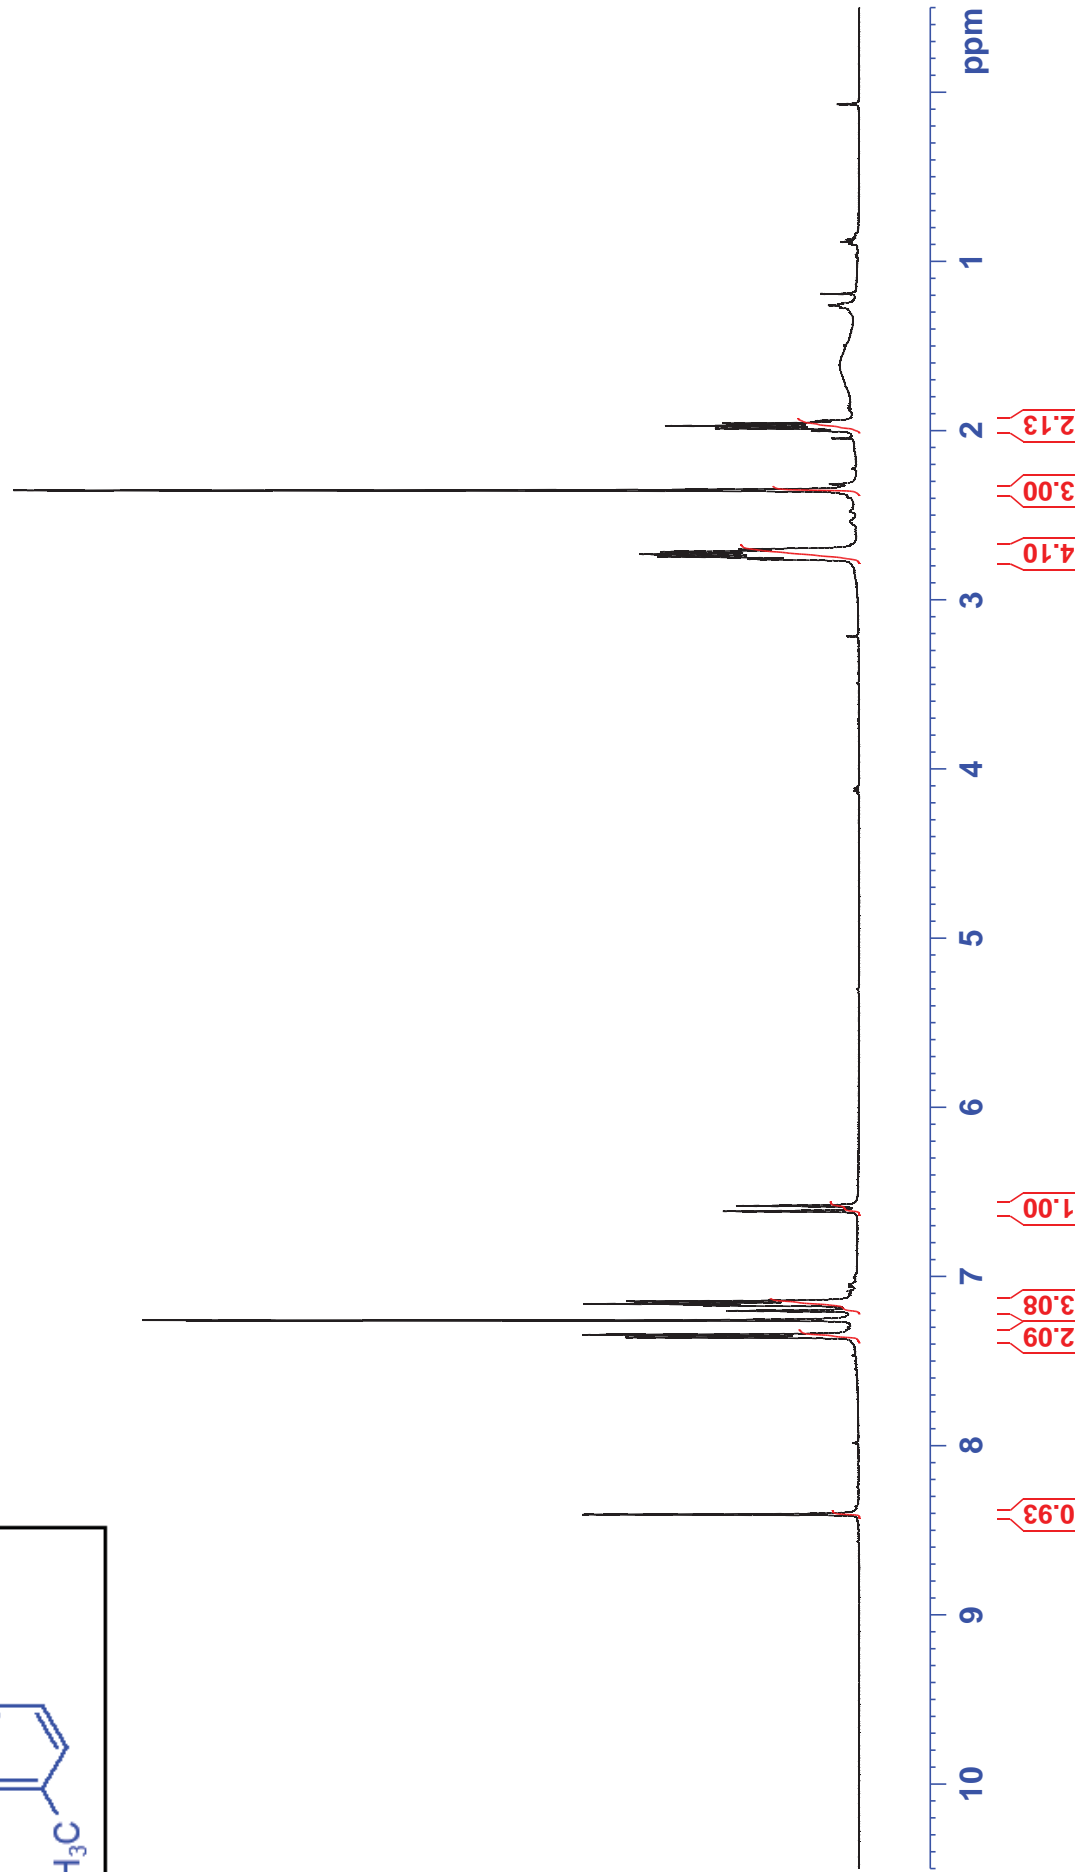

RPD-FGF23-A-35 (3)  
MD-3-A8

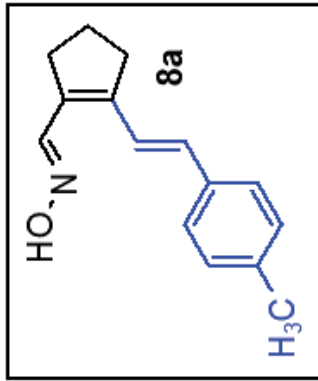

33.65  
32.73

21.71  
21.29

146.41  
145.62

138.04  
134.36  
132.86  
131.97  
129.49  
126.58  
120.19

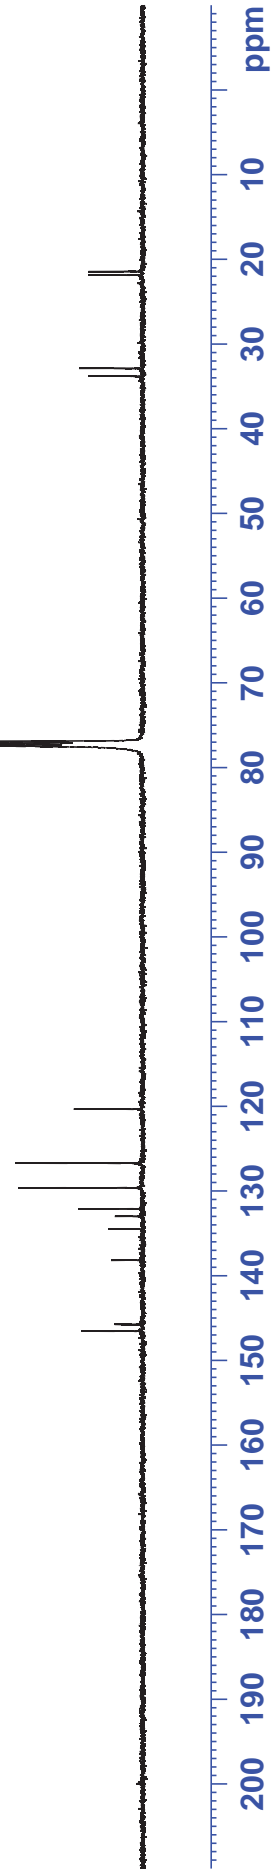

JDC-FGF23-A-21 (3)  
MD-3-A9

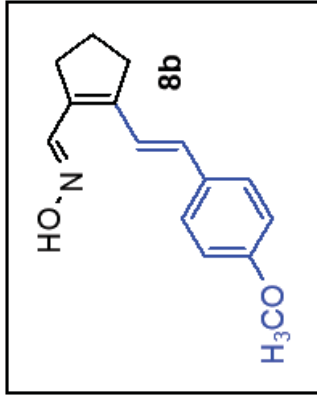

589

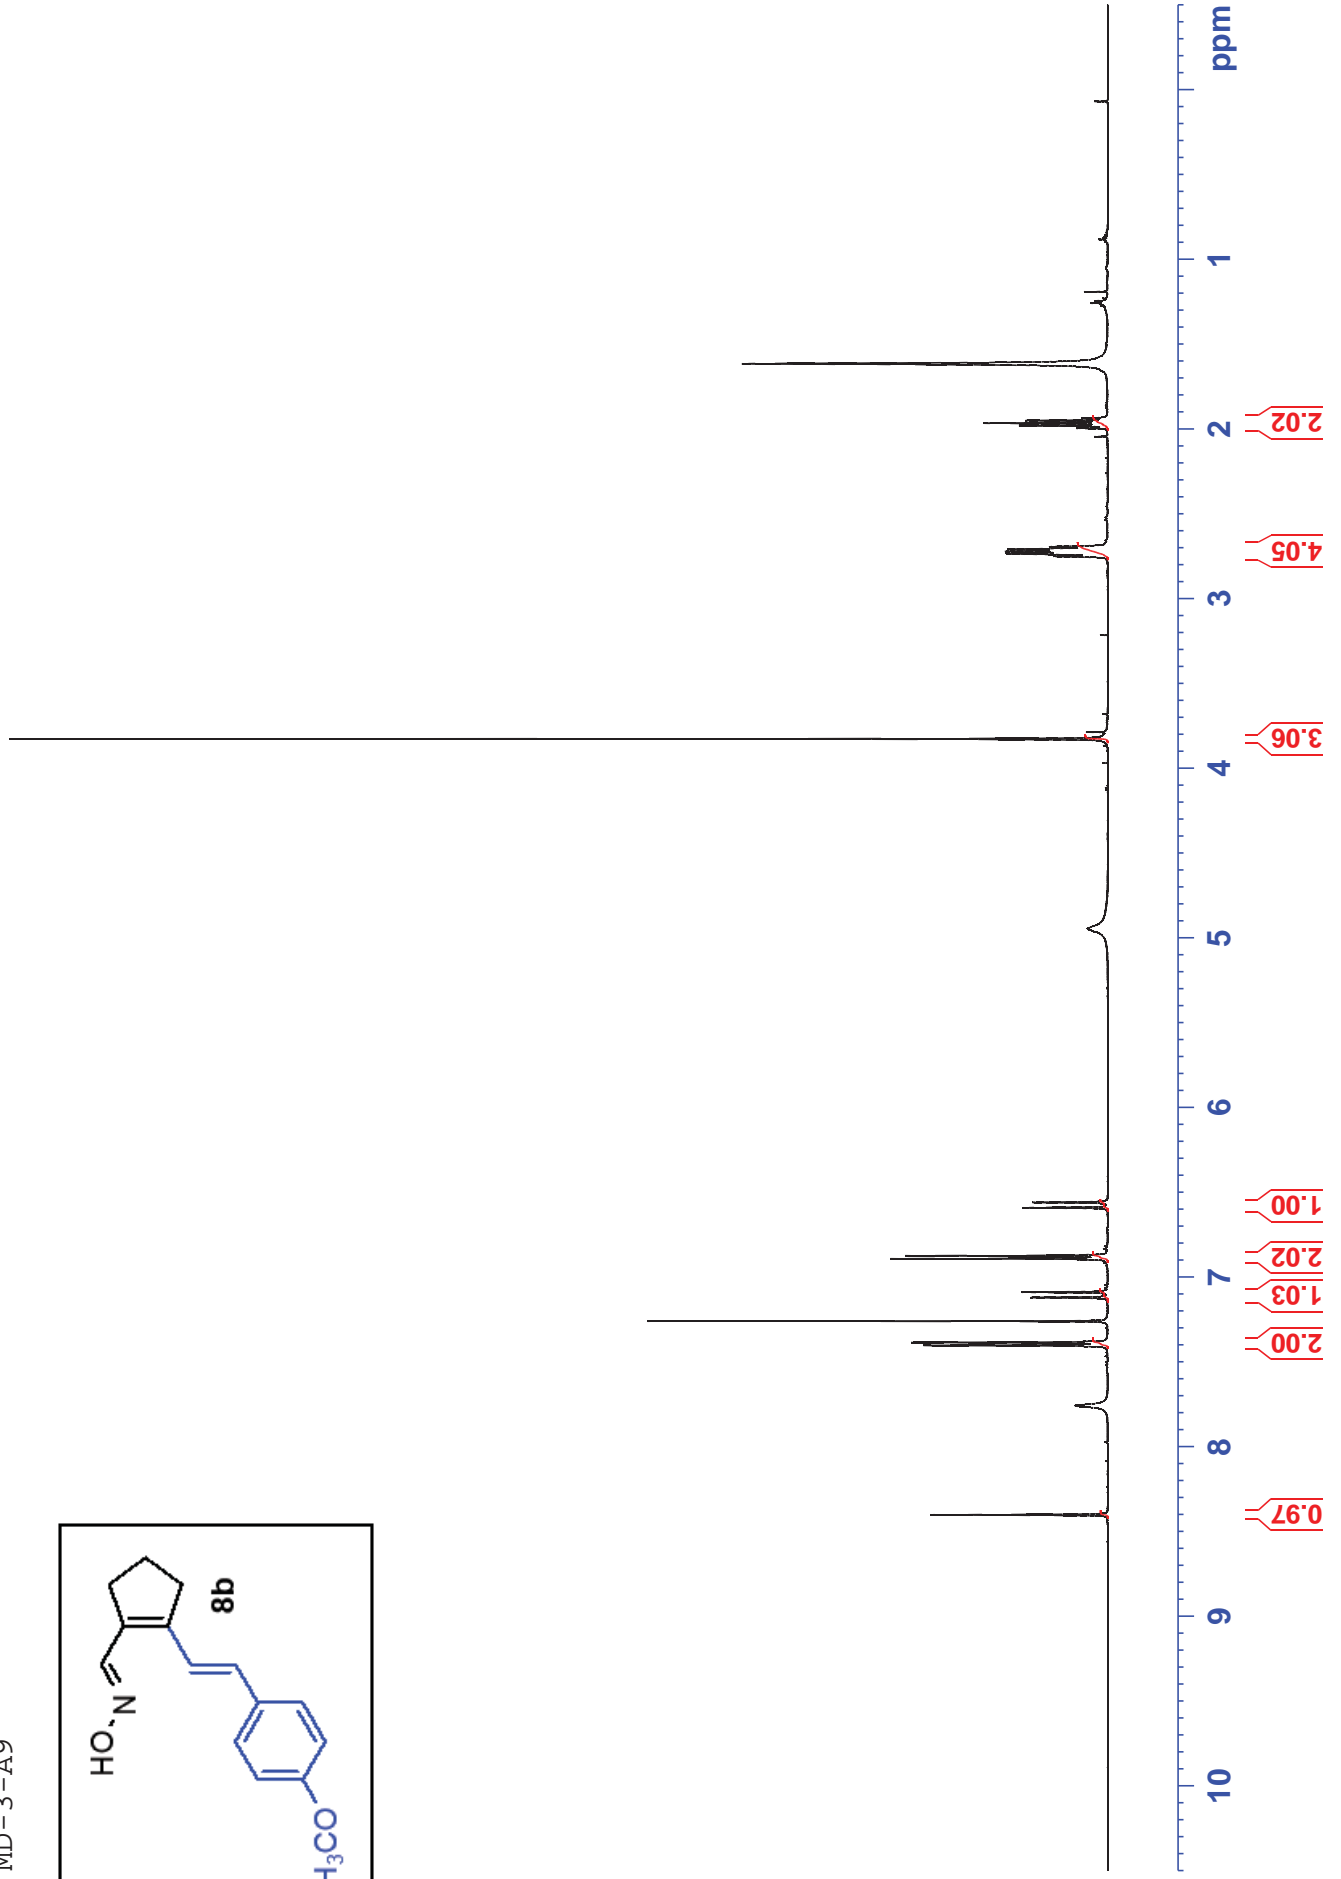

JDC-FGF23-A-21 (3)  
MD-3-A9

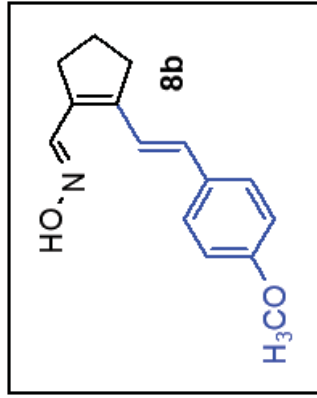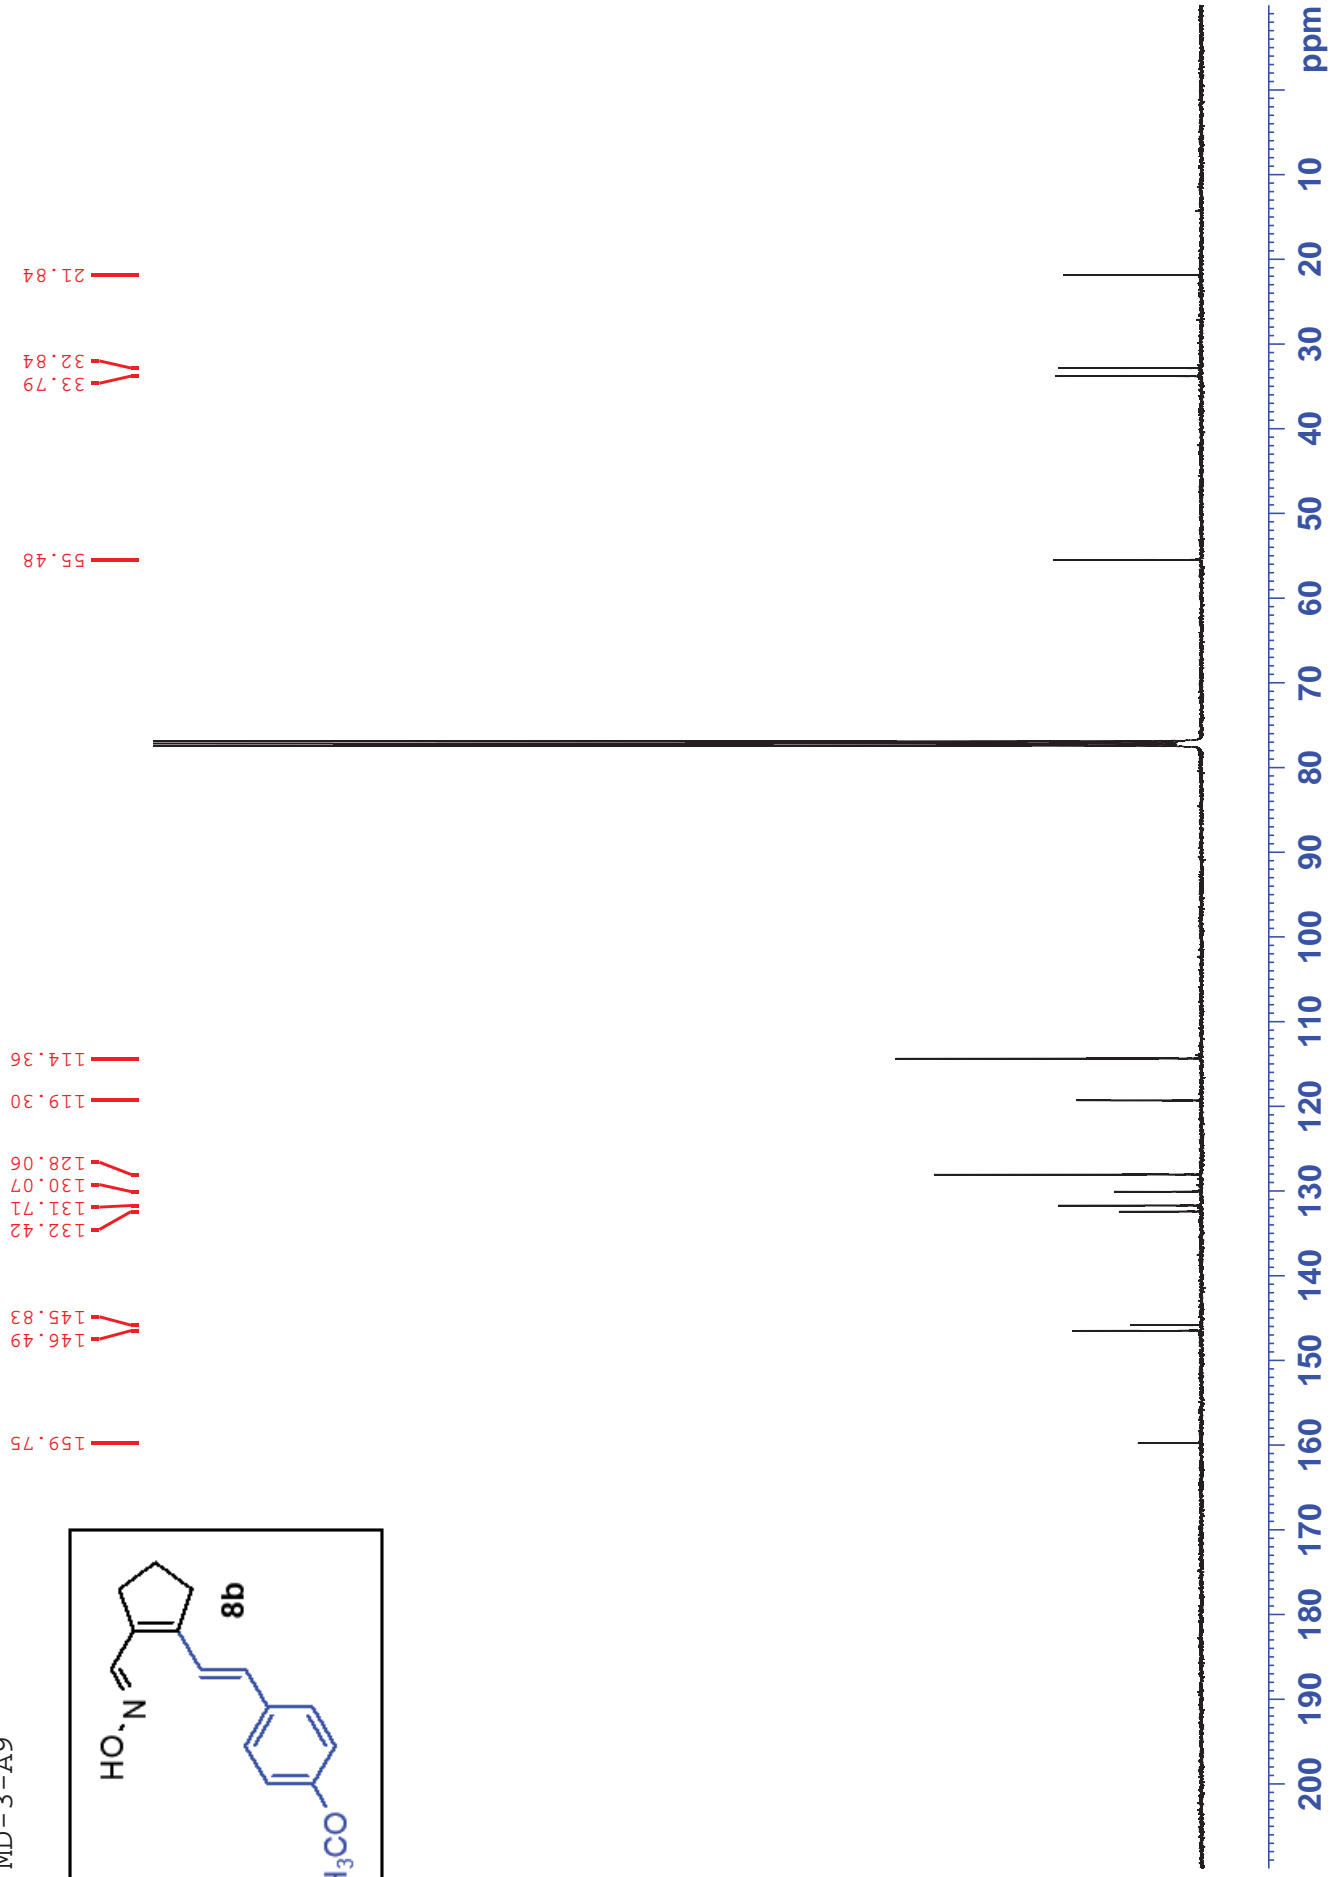

RPD-FGF23-A-33 (3)  
MD-3-A6

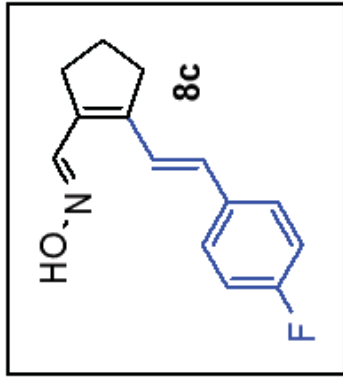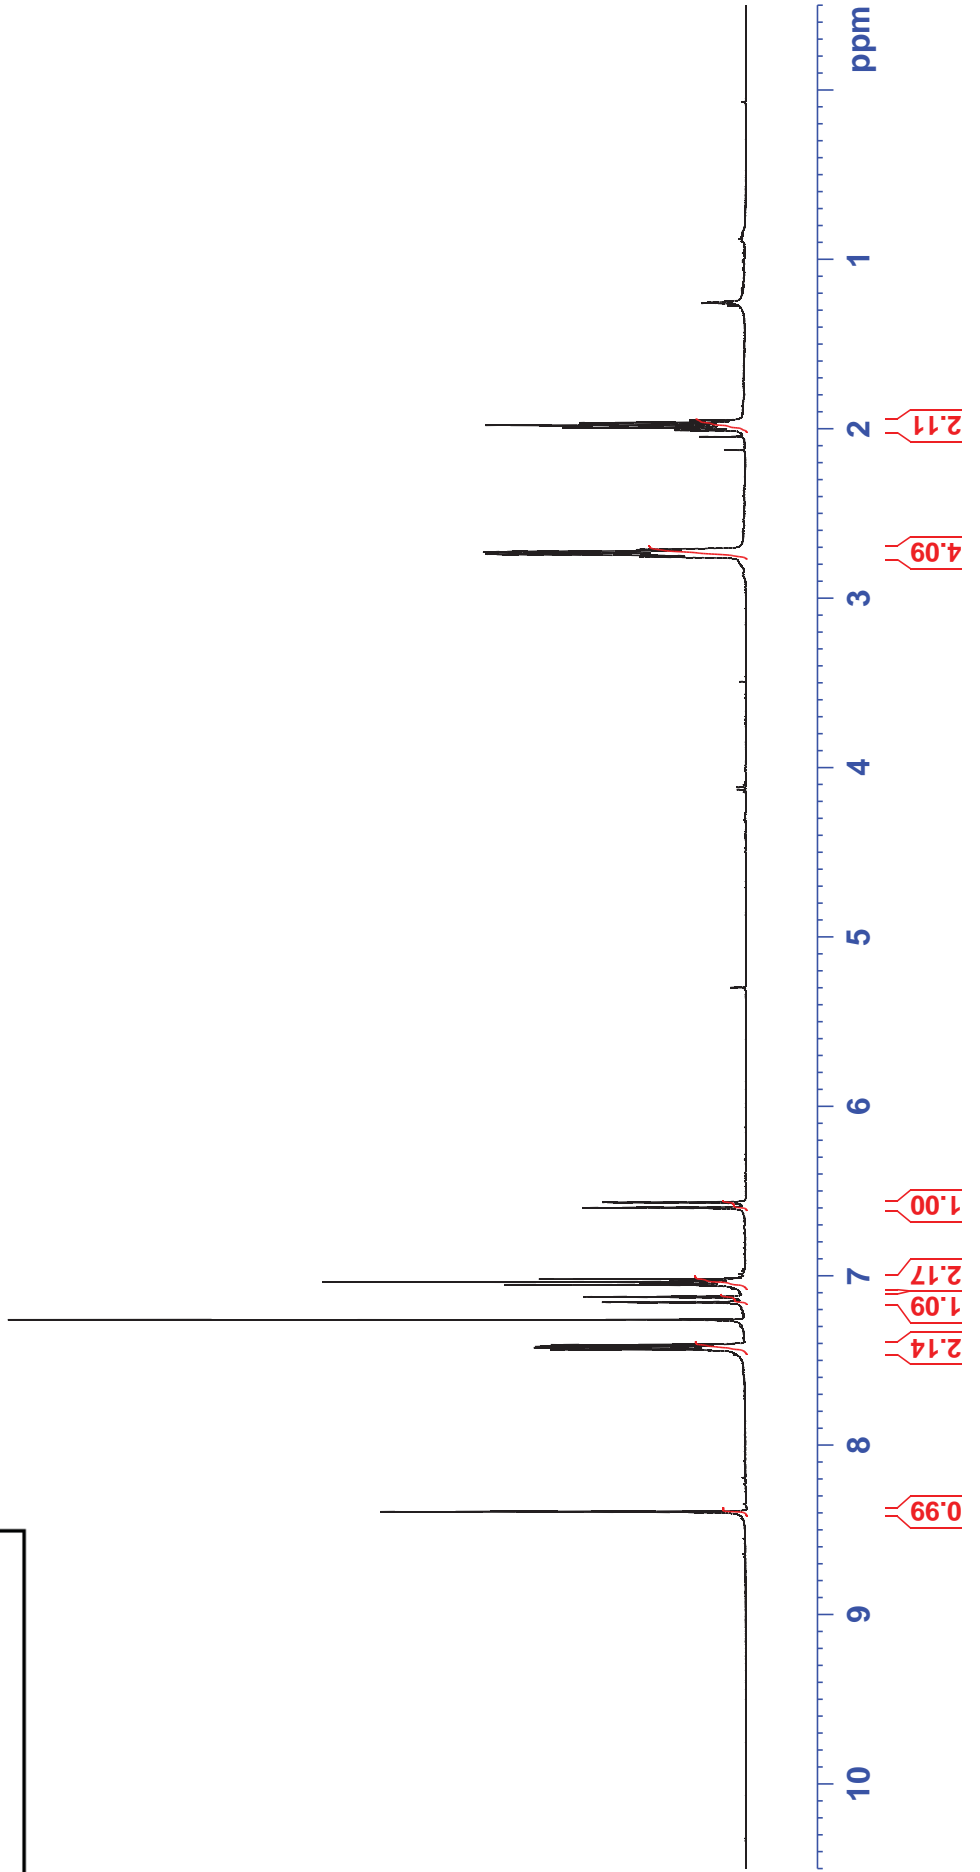

RPD-FGF23-A-33 (3)  
MD-3-A6

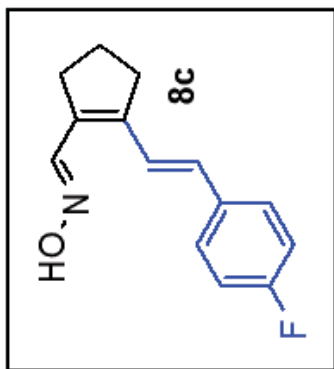

163.68  
161.71

146.14  
145.59

133.50  
133.45  
133.43  
130.98  
128.34  
128.28  
121.02  
121.00  
115.98  
115.81

77.41  
77.15  
76.90

33.78  
32.90

21.81



RPD-FGF23-A-27 (2)  
MD-3-A7

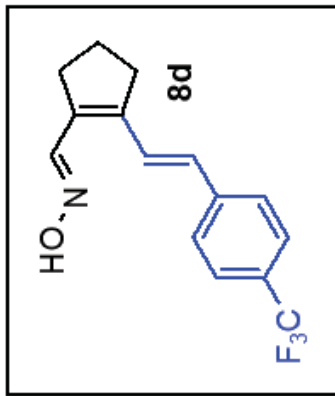

S93

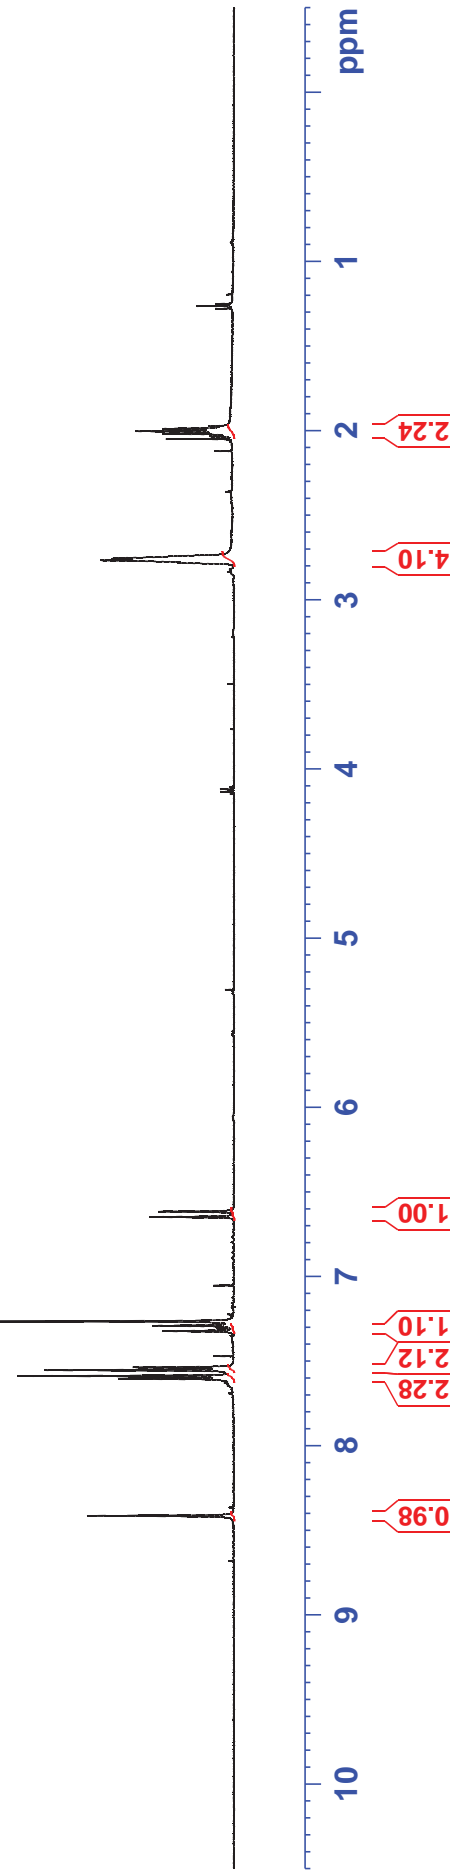

RPD-FGF23-A-27 (2)  
MD-3-A7

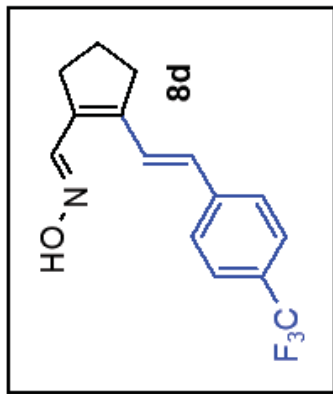

145.92  
144.92  
140.71  
135.26  
130.43  
129.82  
126.83  
125.84  
123.50

33.71  
33.01  
21.79

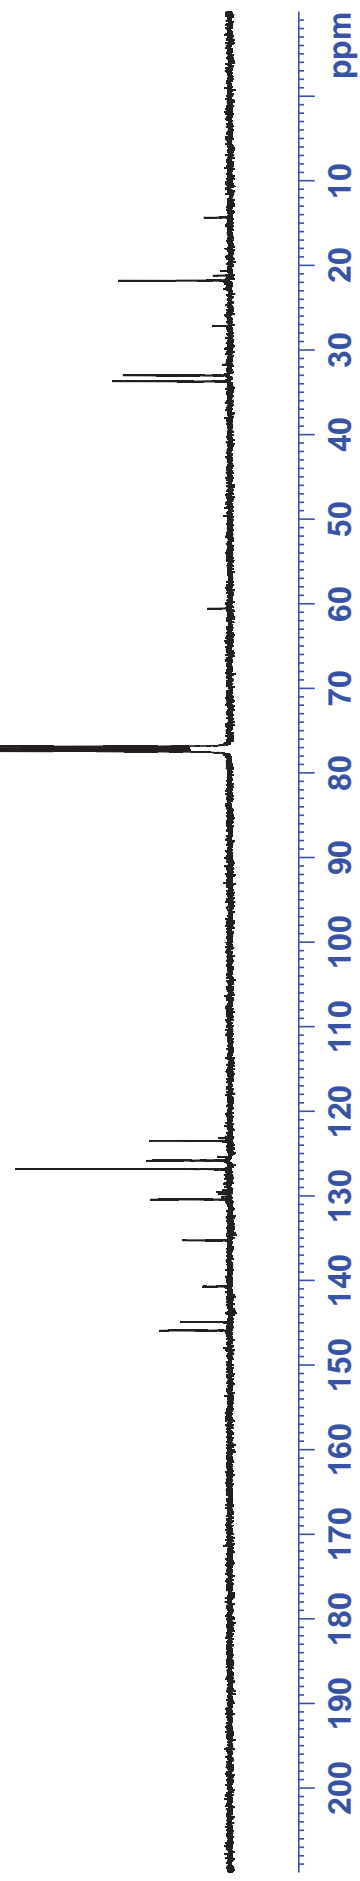

JWC-FGF23-A-65 (2)  
MD-3-A42

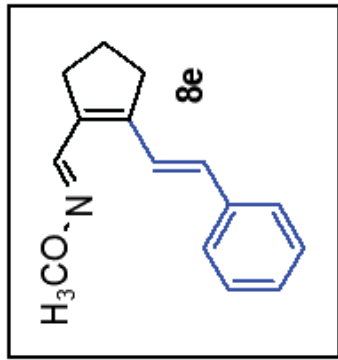

S95

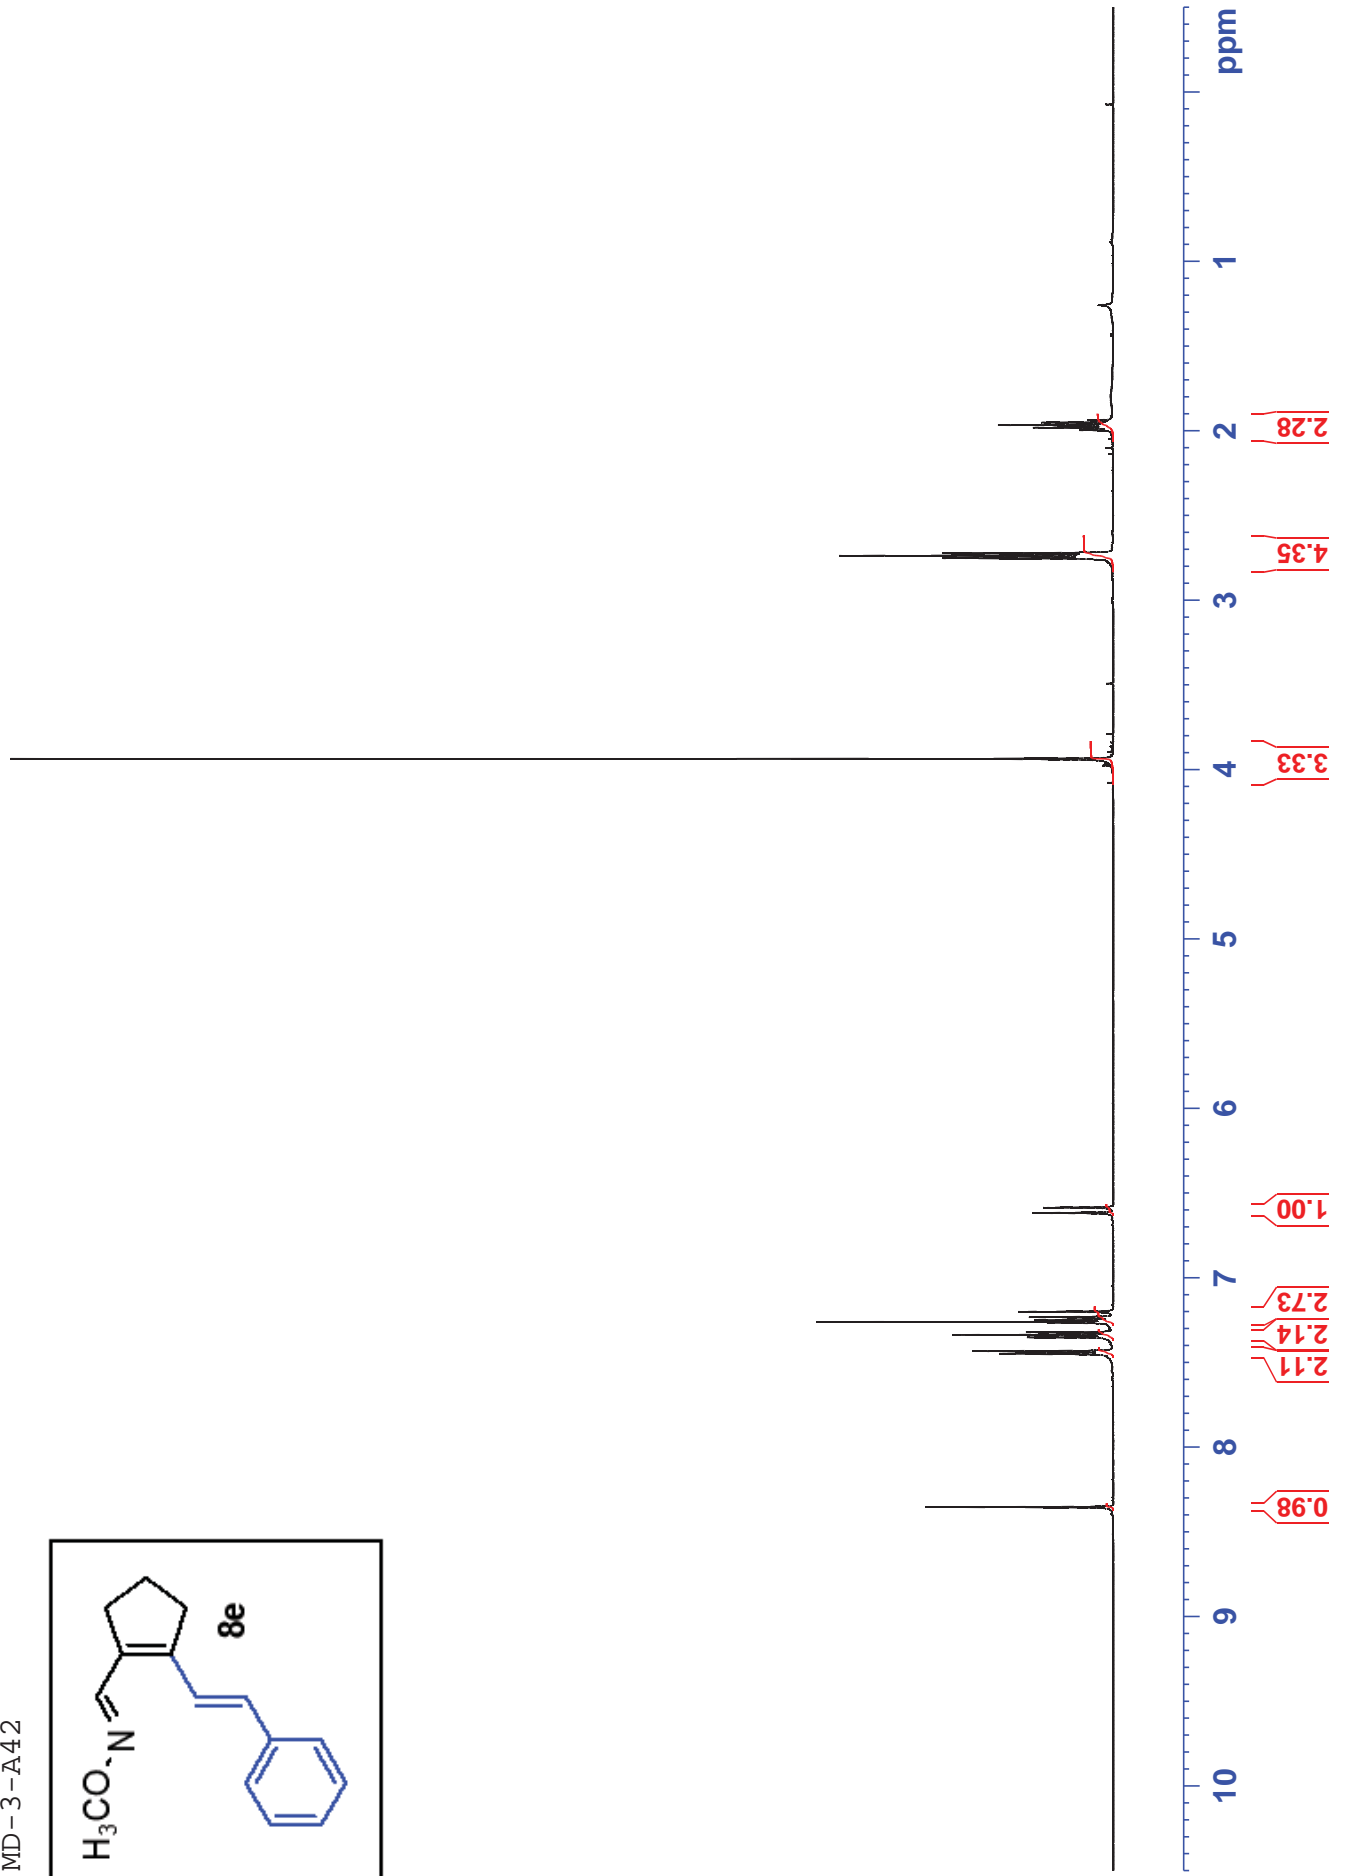

JWC-FGF23-A-65 (2)  
MD-3-A42

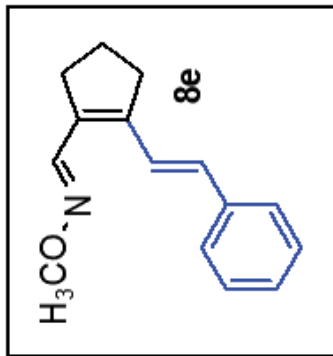

145.09  
144.80  
137.35  
133.89  
131.81  
128.86  
128.05  
126.73  
121.37

62.03

33.76  
33.03

21.90

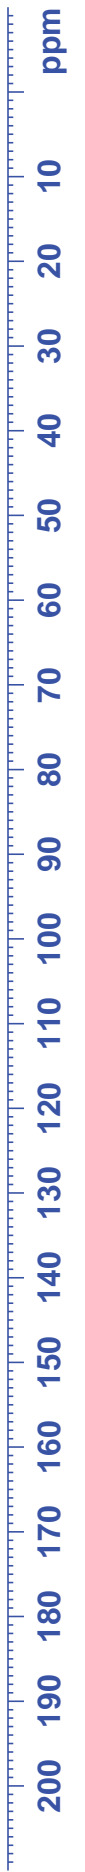

RPD-FGF23-A-31 (3)  
MD-3-A4

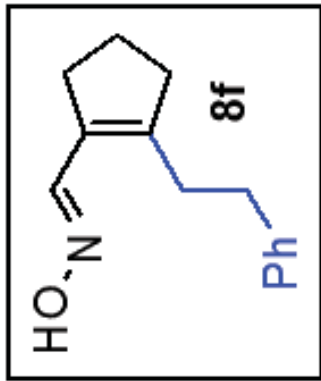

S97

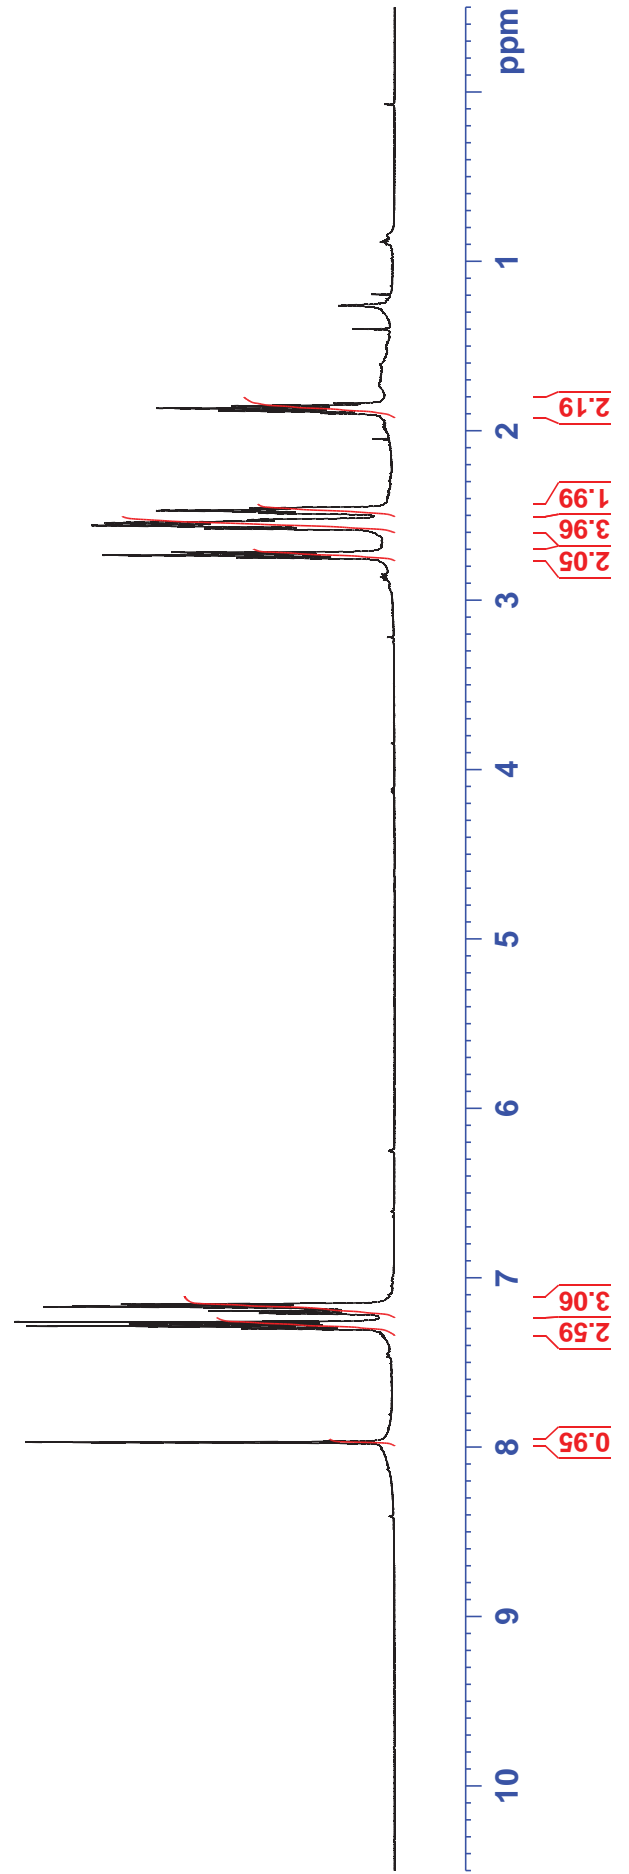

RPD-FGF23-A-31 (3)  
MD-3-A4

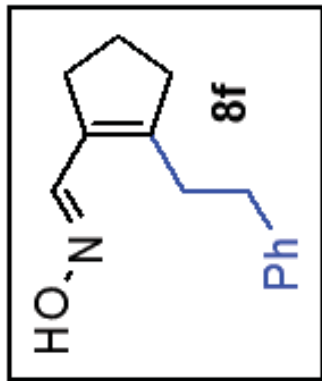

149.89  
146.45  
141.49  
130.00  
128.54  
128.39  
126.22

37.15  
34.74  
32.08  
30.85  
21.95

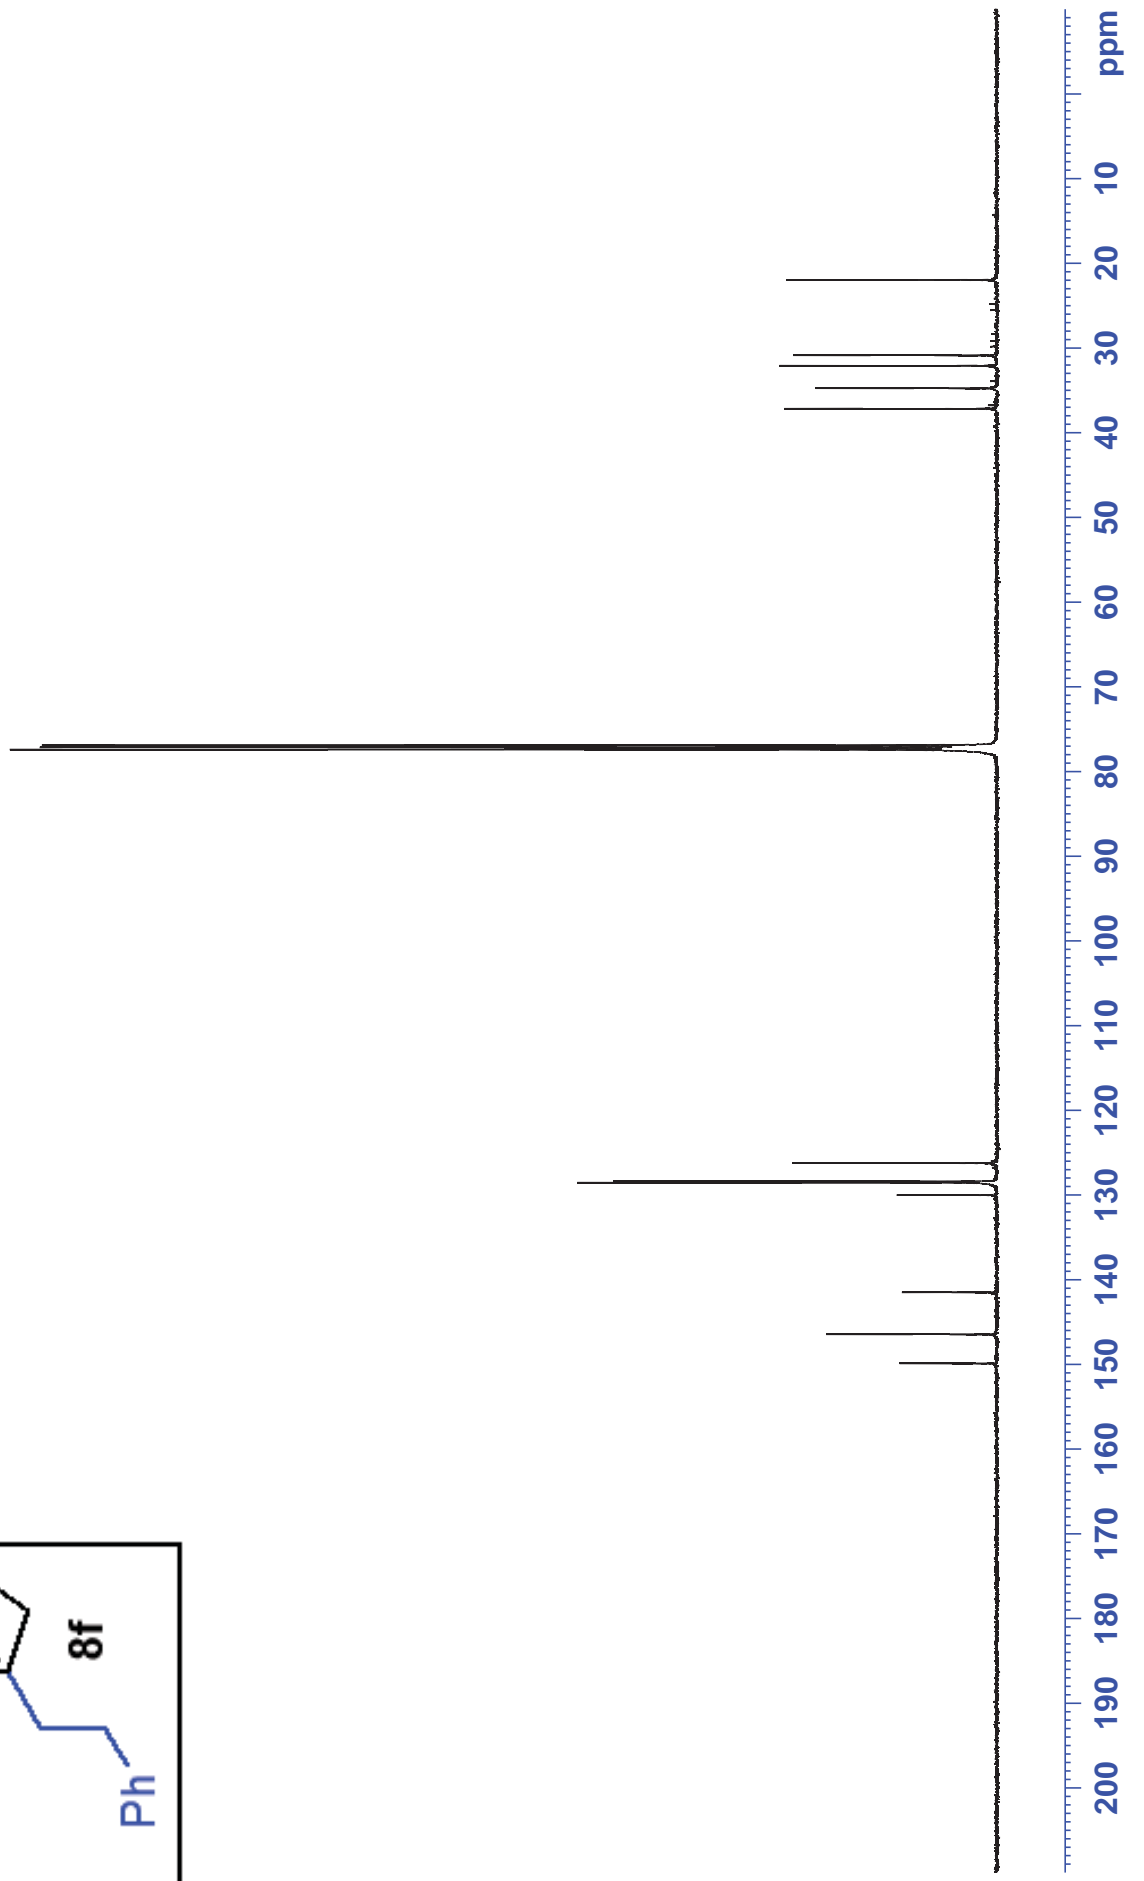

JDC-FGF23-A23 (2)  
MD-3-A29

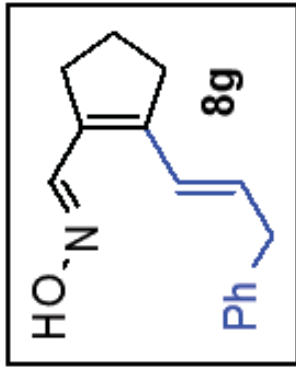

599

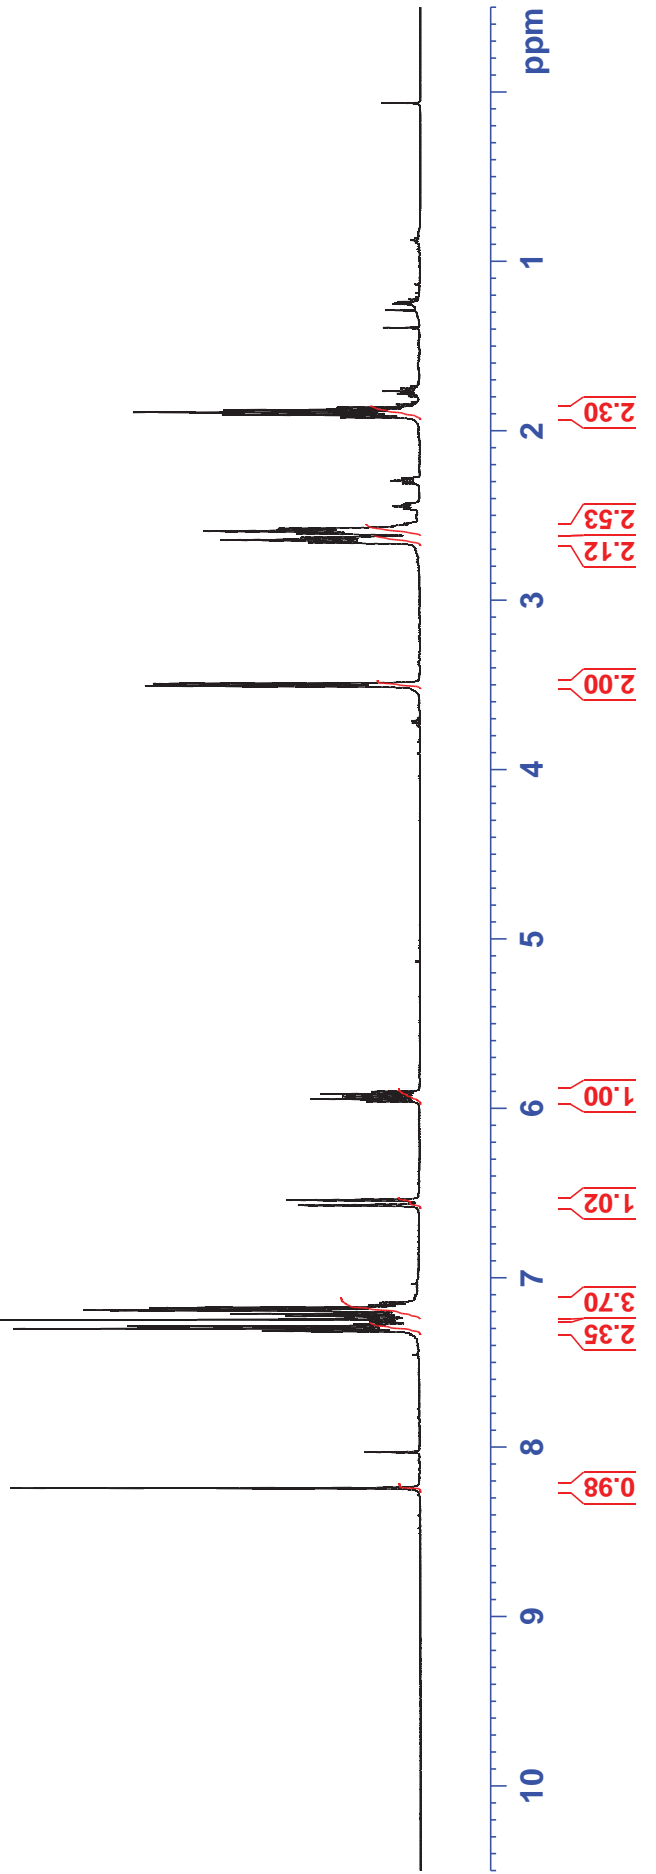

JDC-FGF23-A-23 (2)  
MD-3-A29

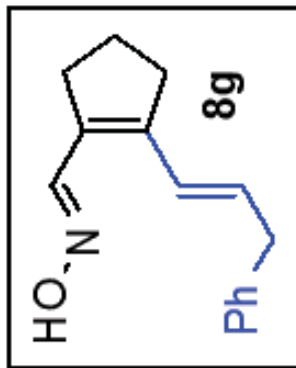

146.17  
145.80  
139.86  
133.69  
131.38  
128.76  
128.71  
128.51  
126.45  
124.23

39.78  
33.97  
32.63  
21.73

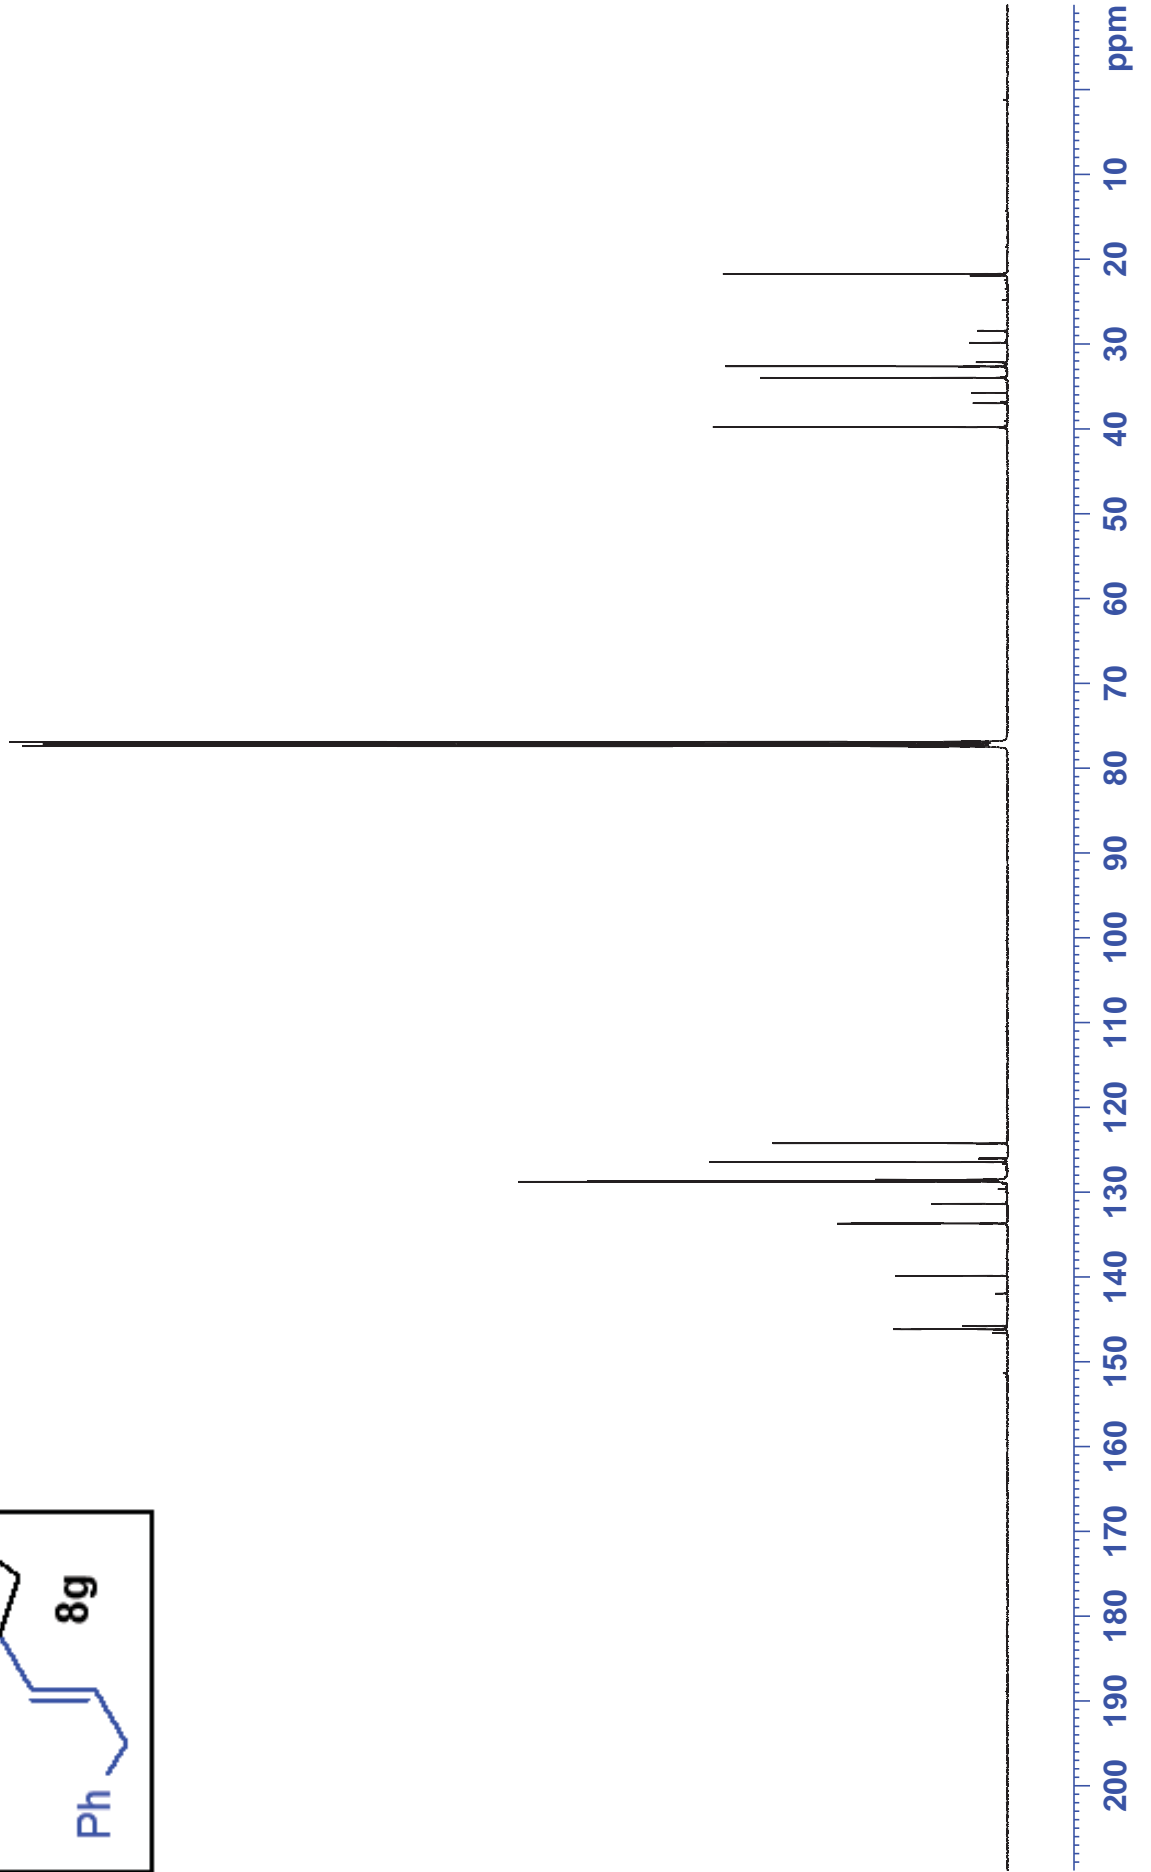



JWC-FGF23-A-43 (3)  
MD-3-A12

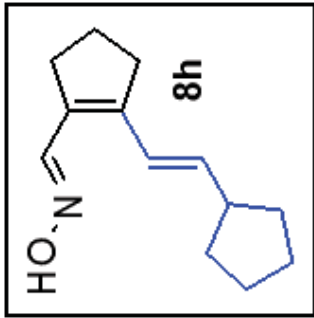

S101

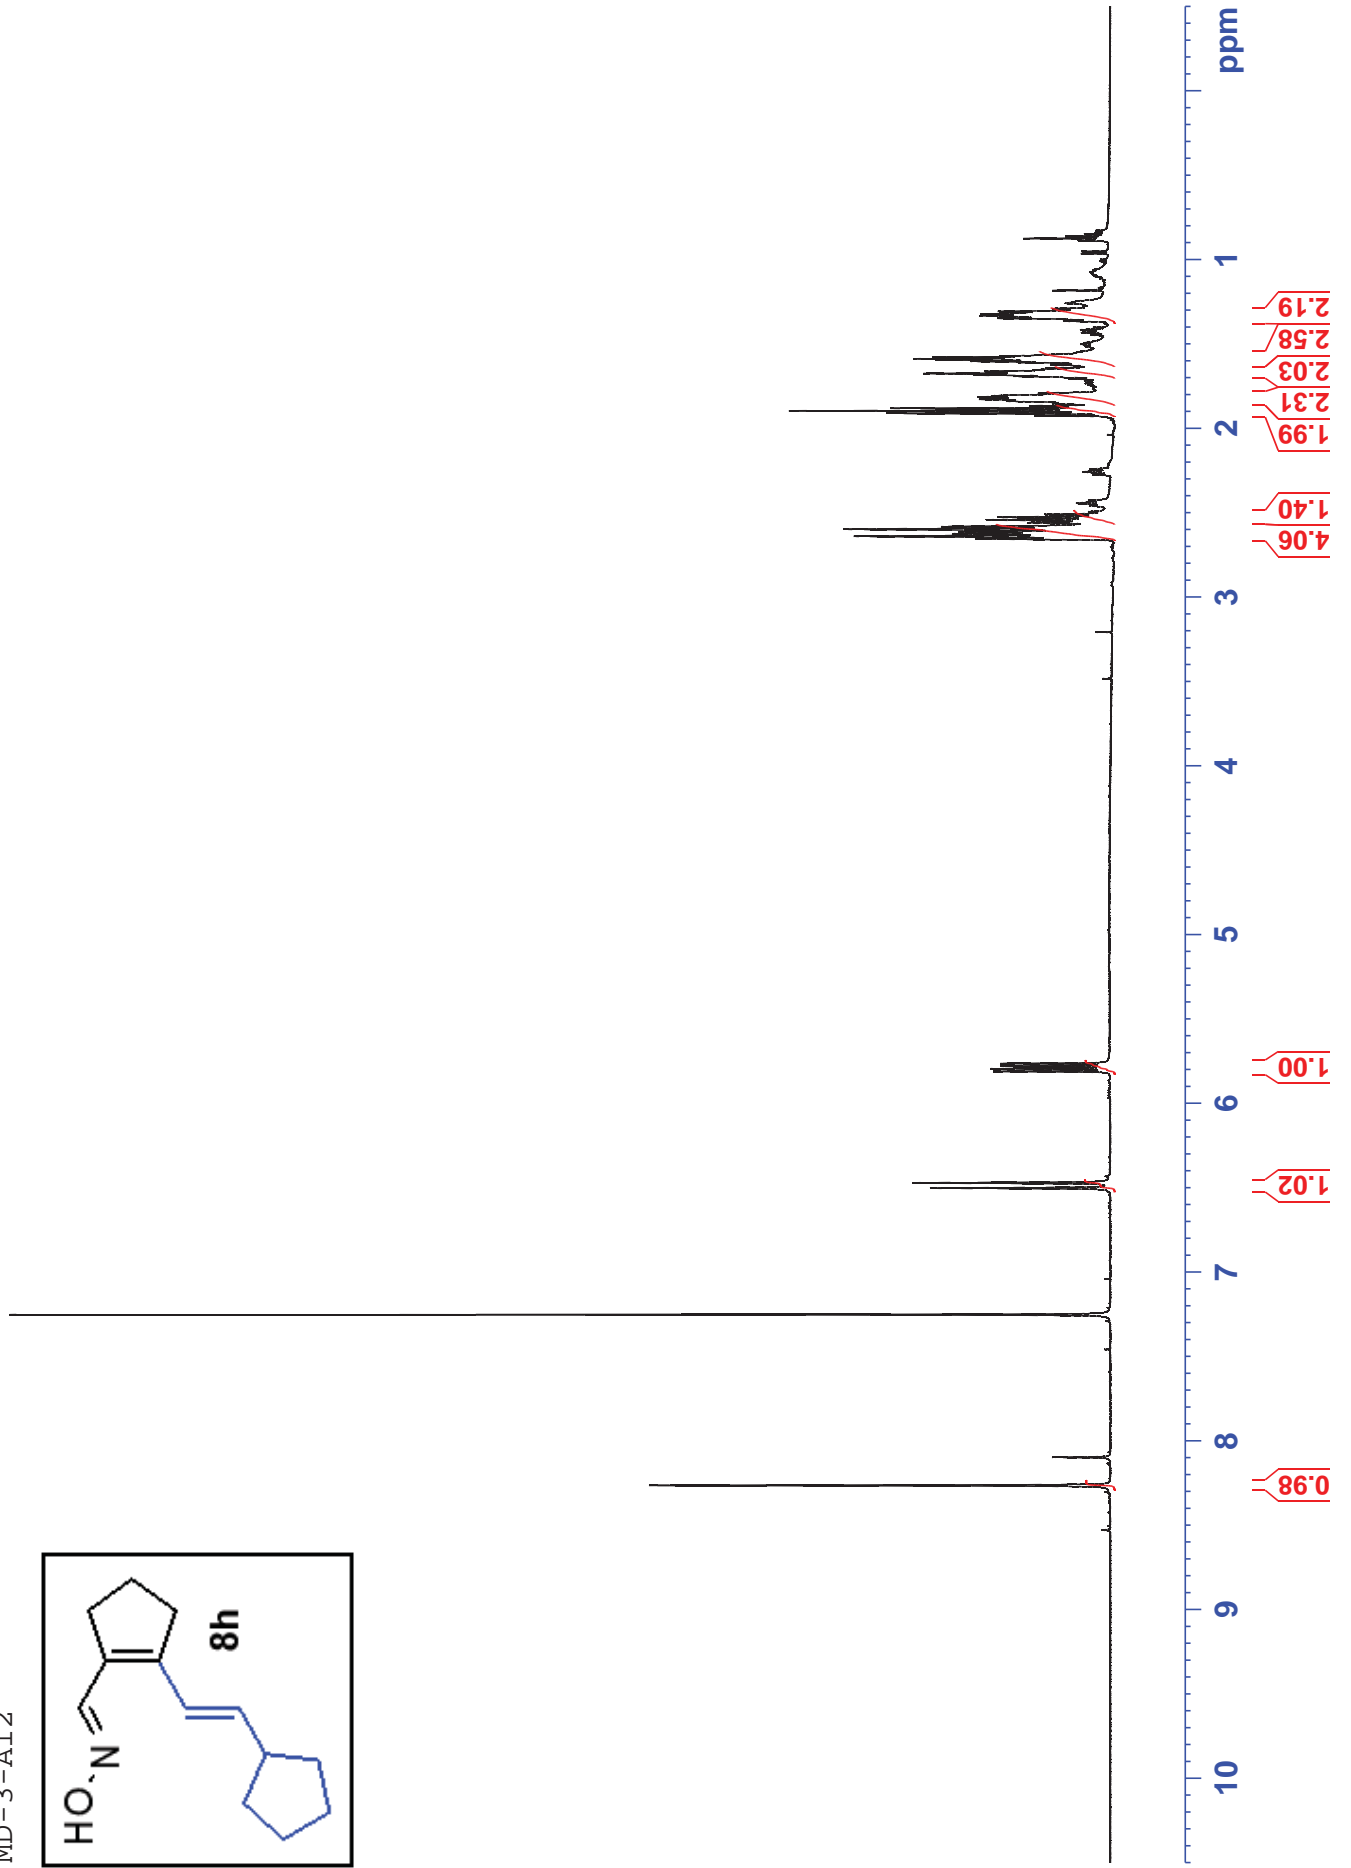

JWC-FGF23-A-43 (3)  
MD-3-A12

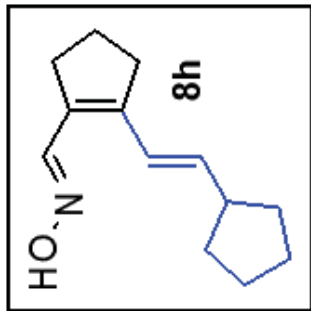

44.24  
34.02  
33.42  
32.60  
25.41  
21.81

146.79  
146.50  
140.56  
130.21  
121.28

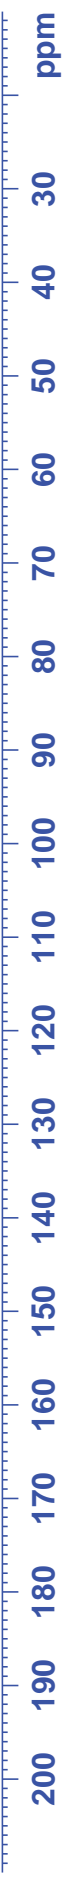

JWC-FGF23-A-47 (3)  
MD-3-A13

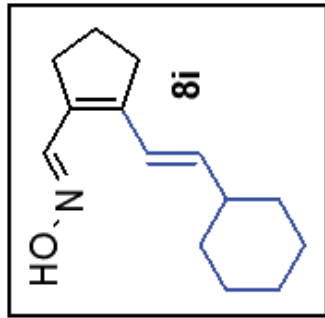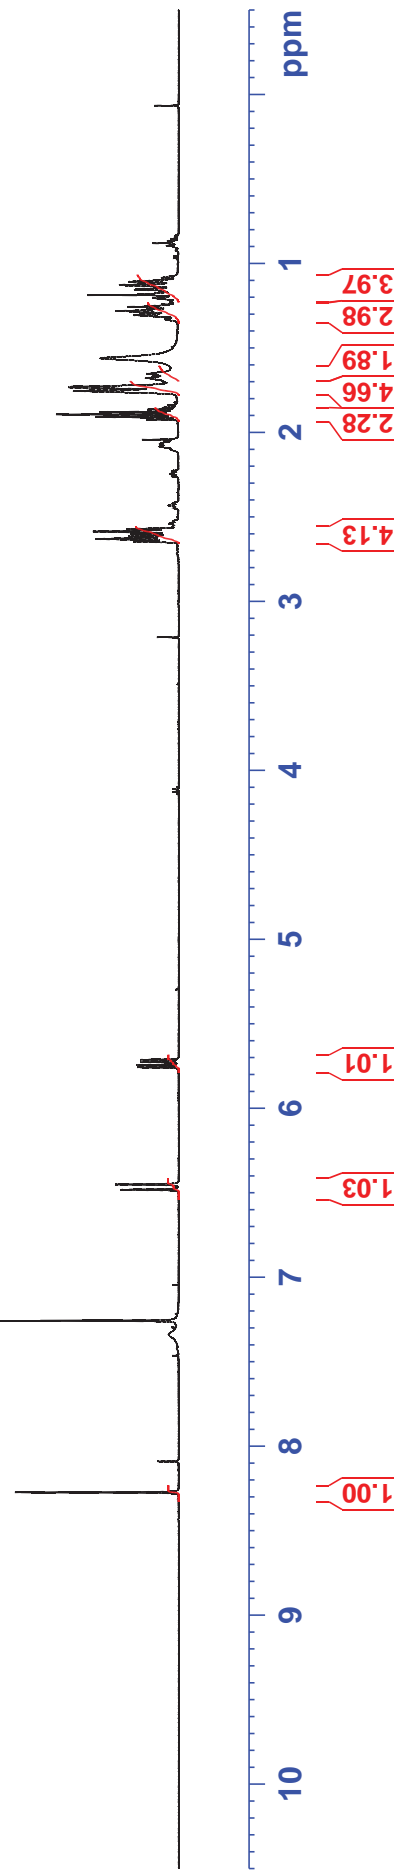

JWC-FGF23-A-47 (3)  
MD-3-A13

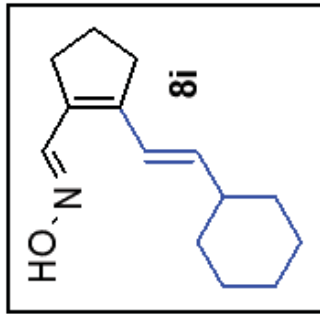

41.51  
33.91  
32.97  
32.60  
26.23  
26.10  
21.77

146.70  
146.09  
141.14  
130.64  
120.62

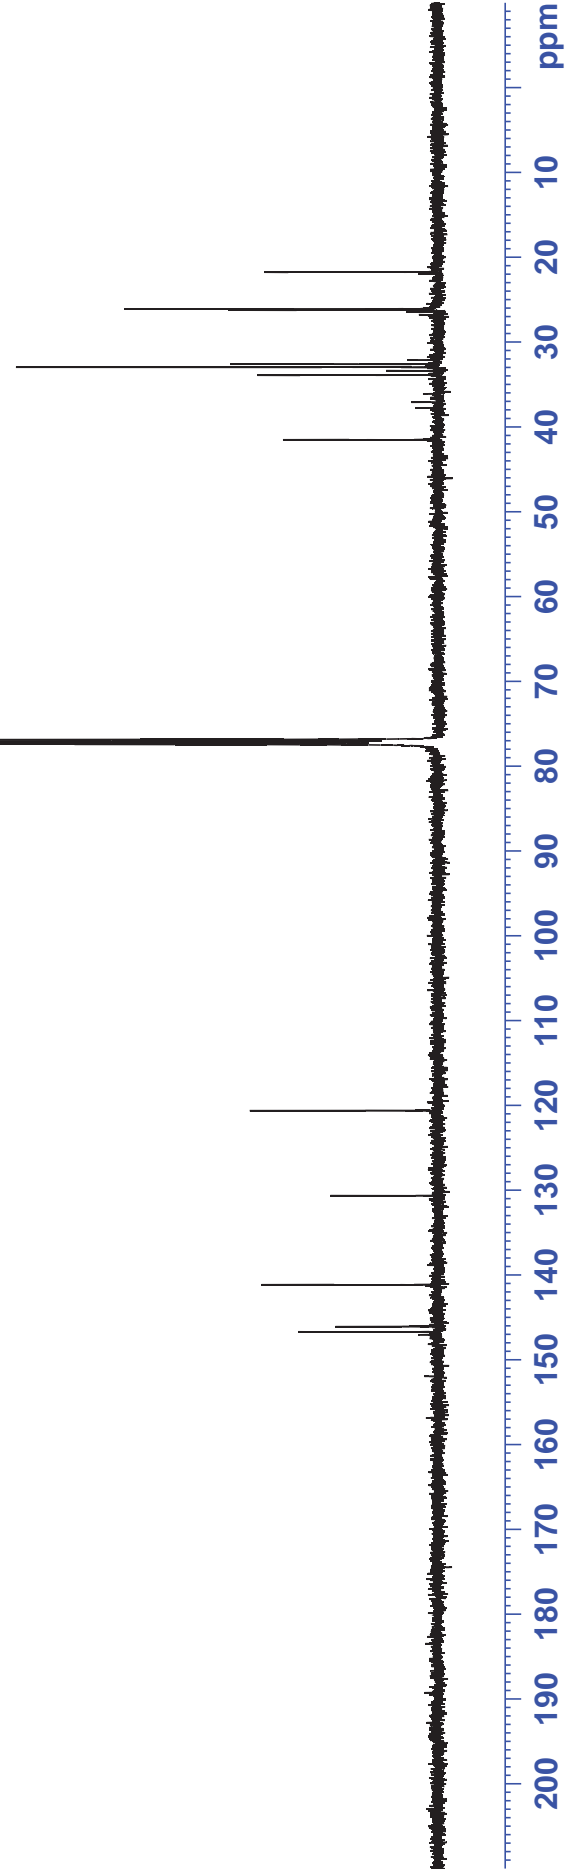

JWC-FGF23-A-39 (3)  
MD-3-A21

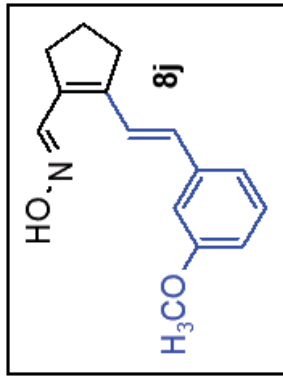

S105

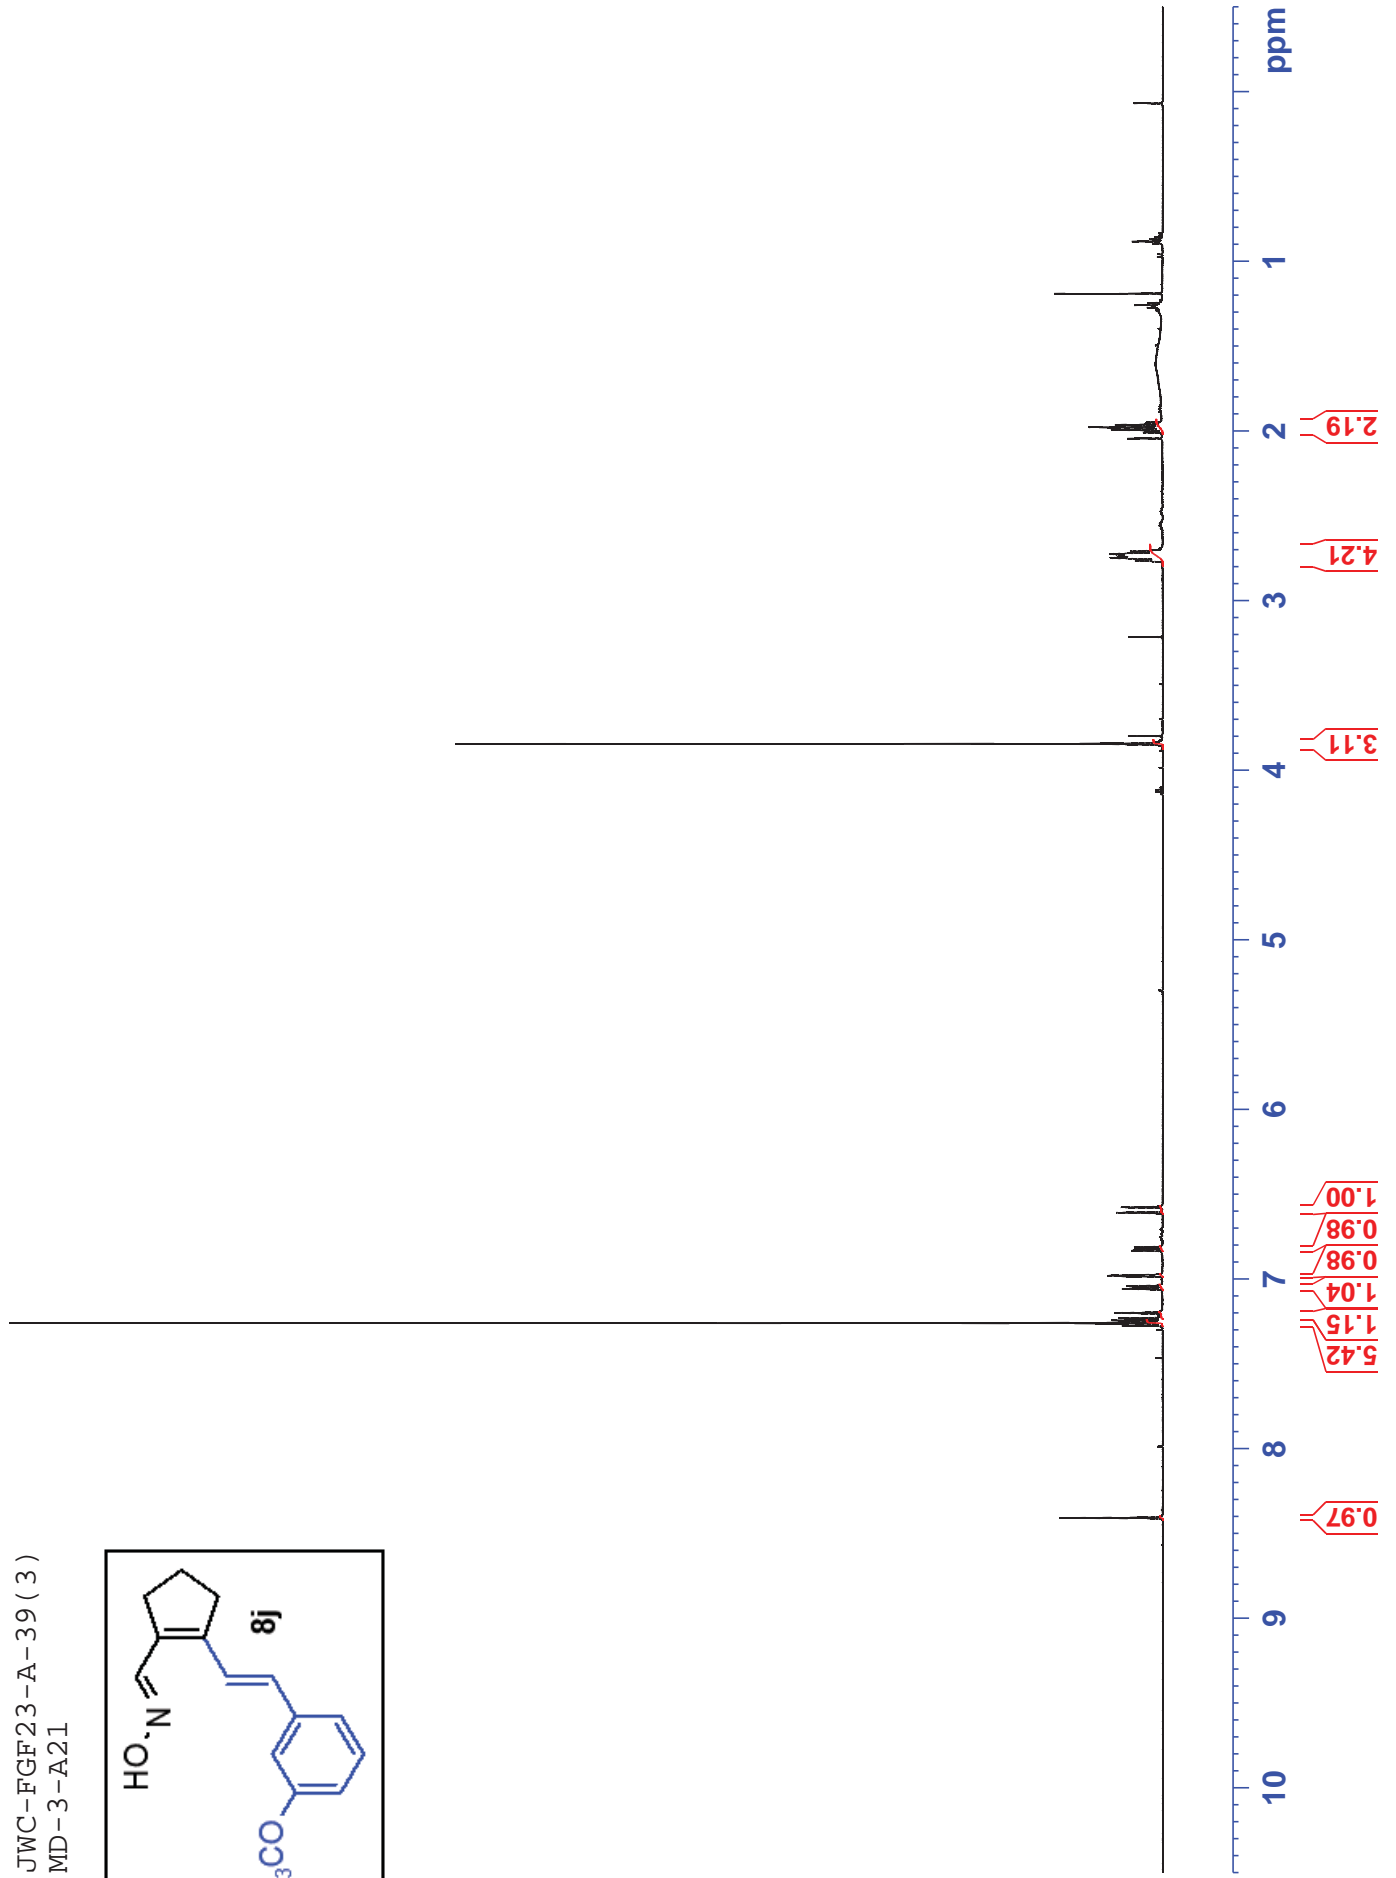

JWC-FGF23-A-39 (5)  
MD-3-A21

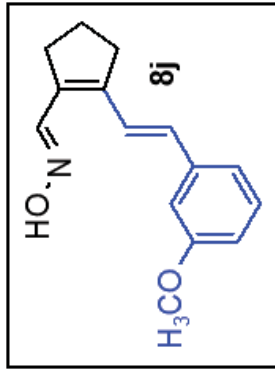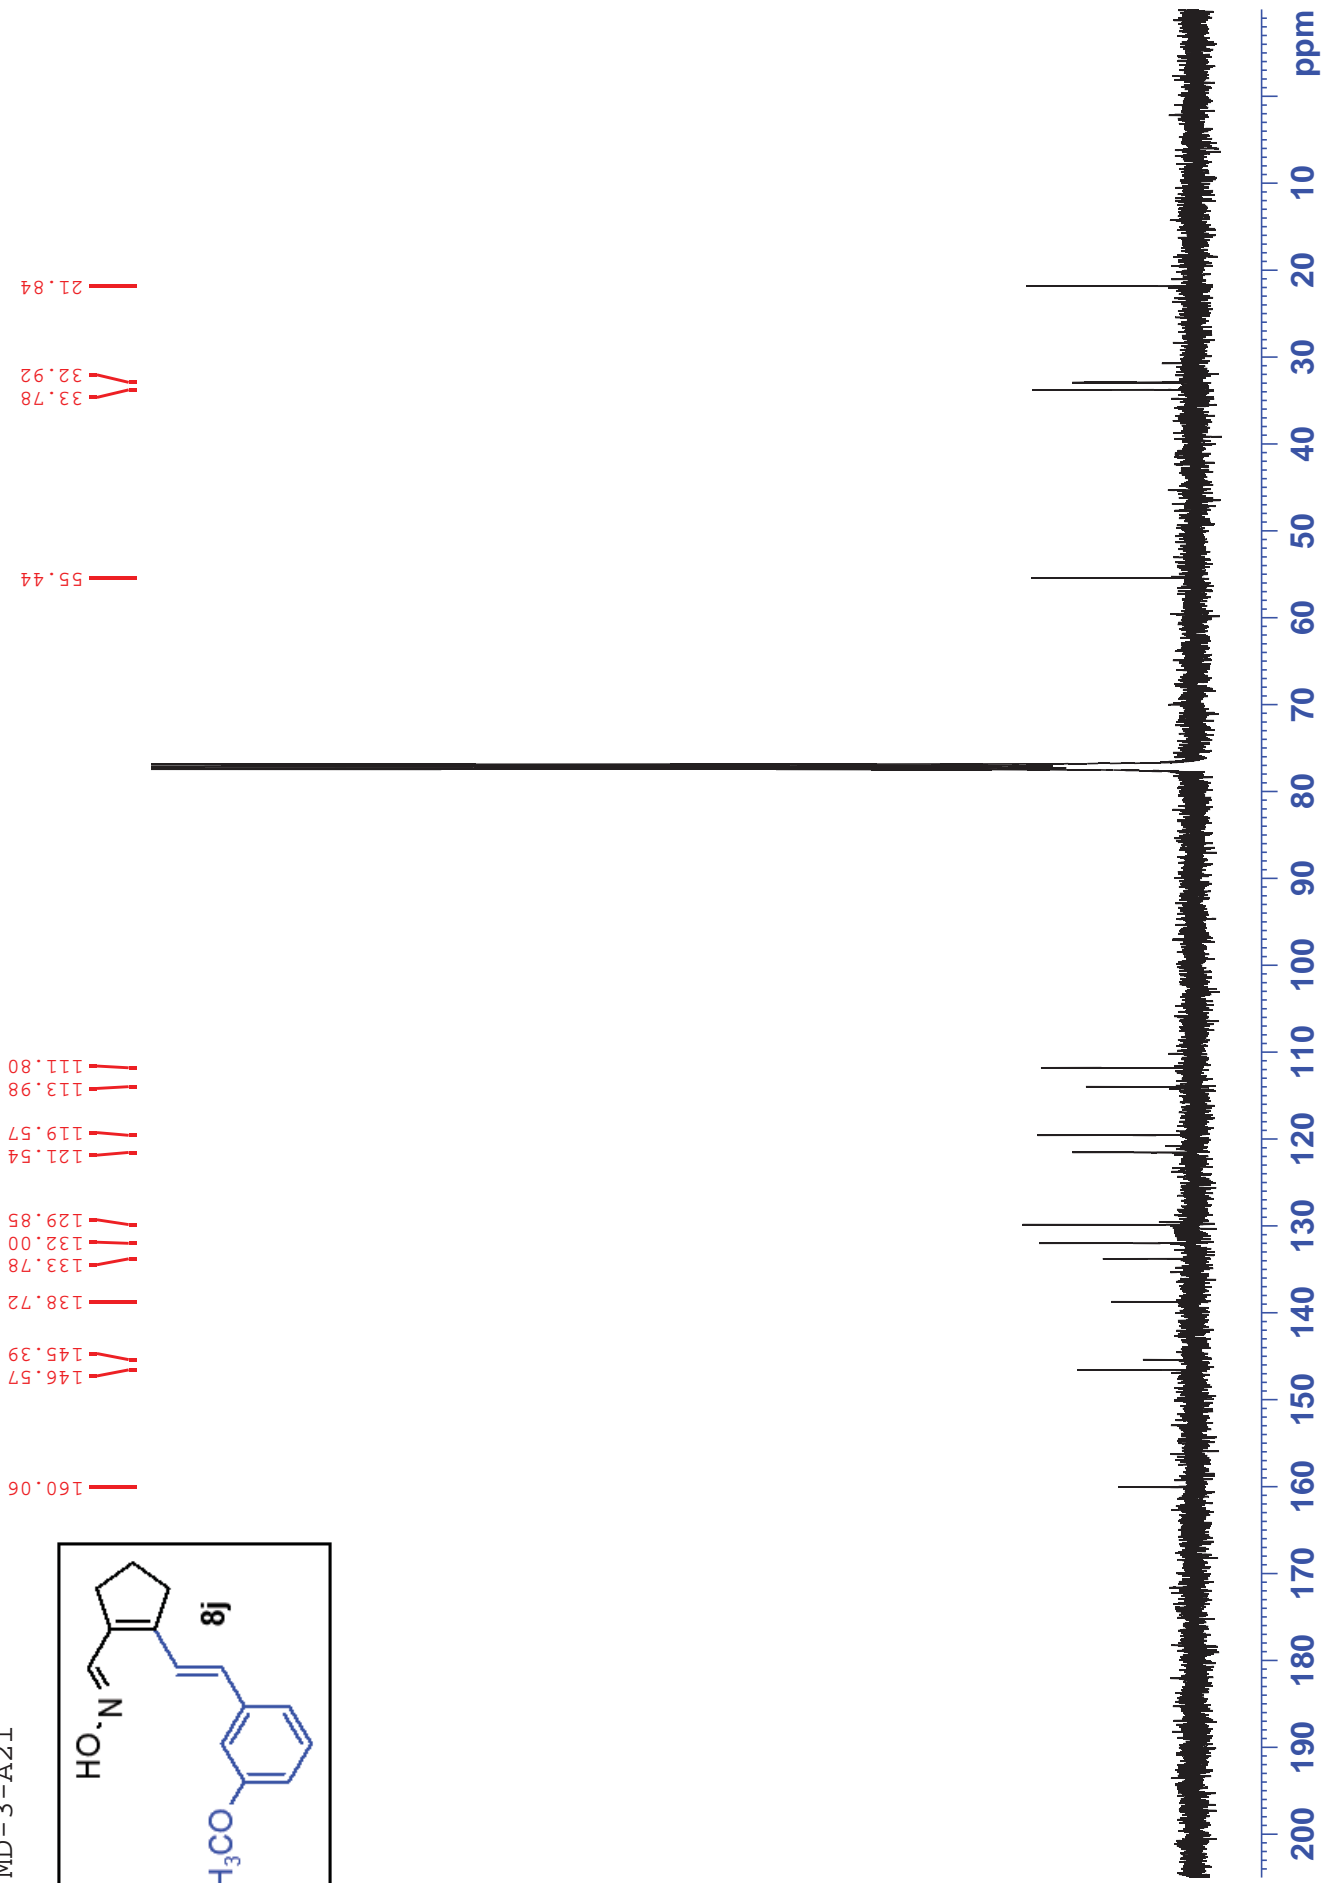

JWC-FGF23-A-41 (3)  
MD-3-A22

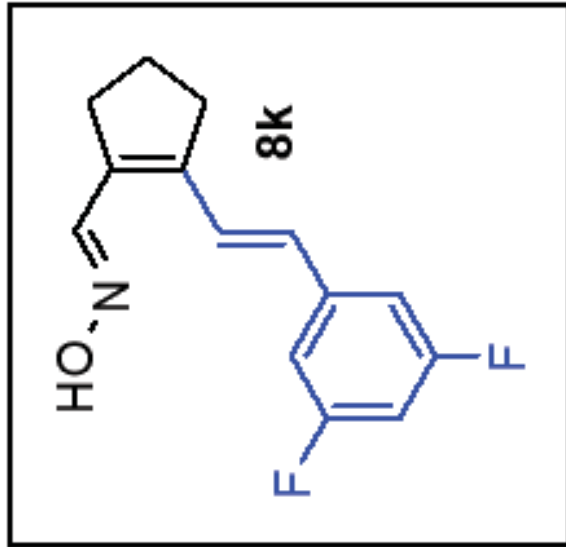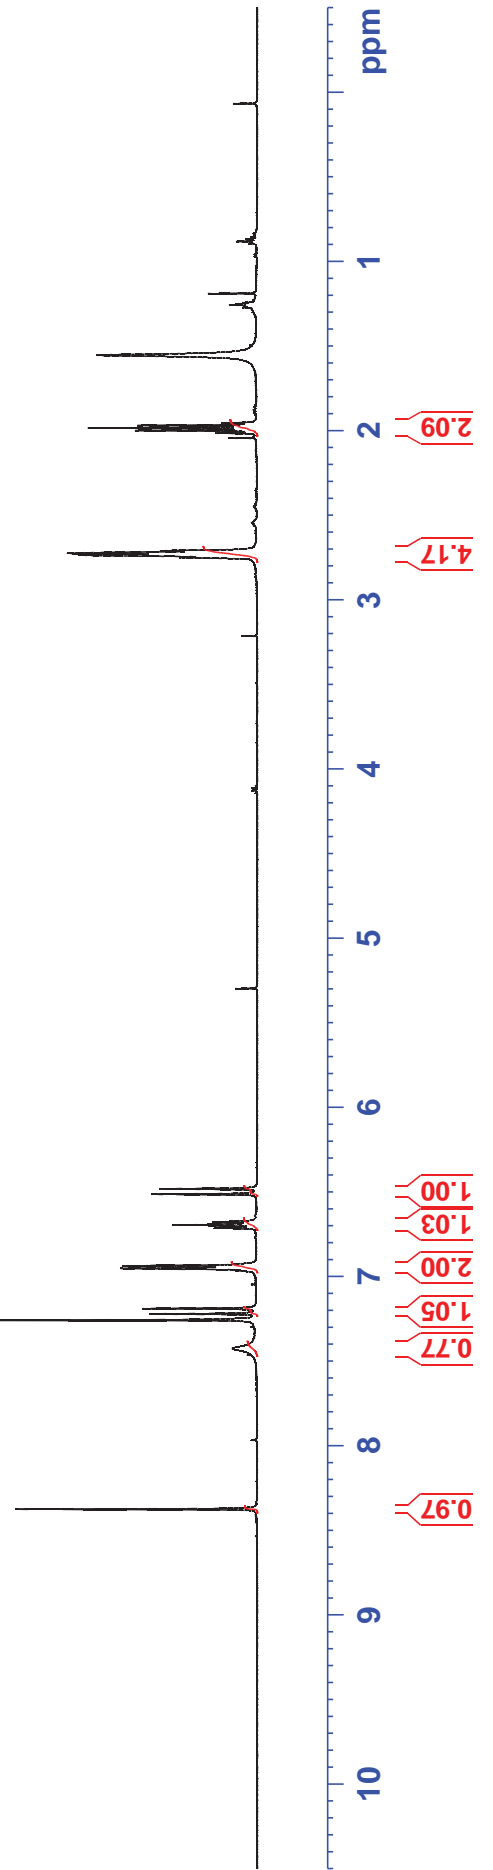

JWC-FGF23-A-41 (6)  
MD-3-A22

- 165.26
- 165.16
- 163.31
- 163.20
- 145.76
- 143.14
- 142.60
- 137.97
- 129.66
- 129.64
- 129.61
- 125.42
- 110.30
- 110.25
- 110.14
- 110.09
- 103.35
- 103.14
- 102.94
- 33.93
- 33.72
- 22.32

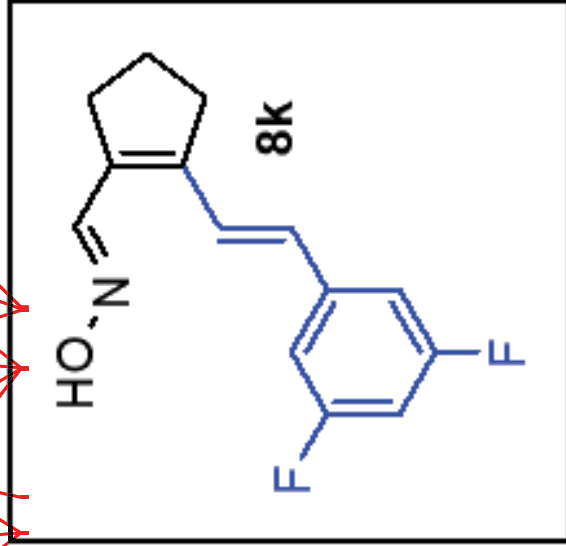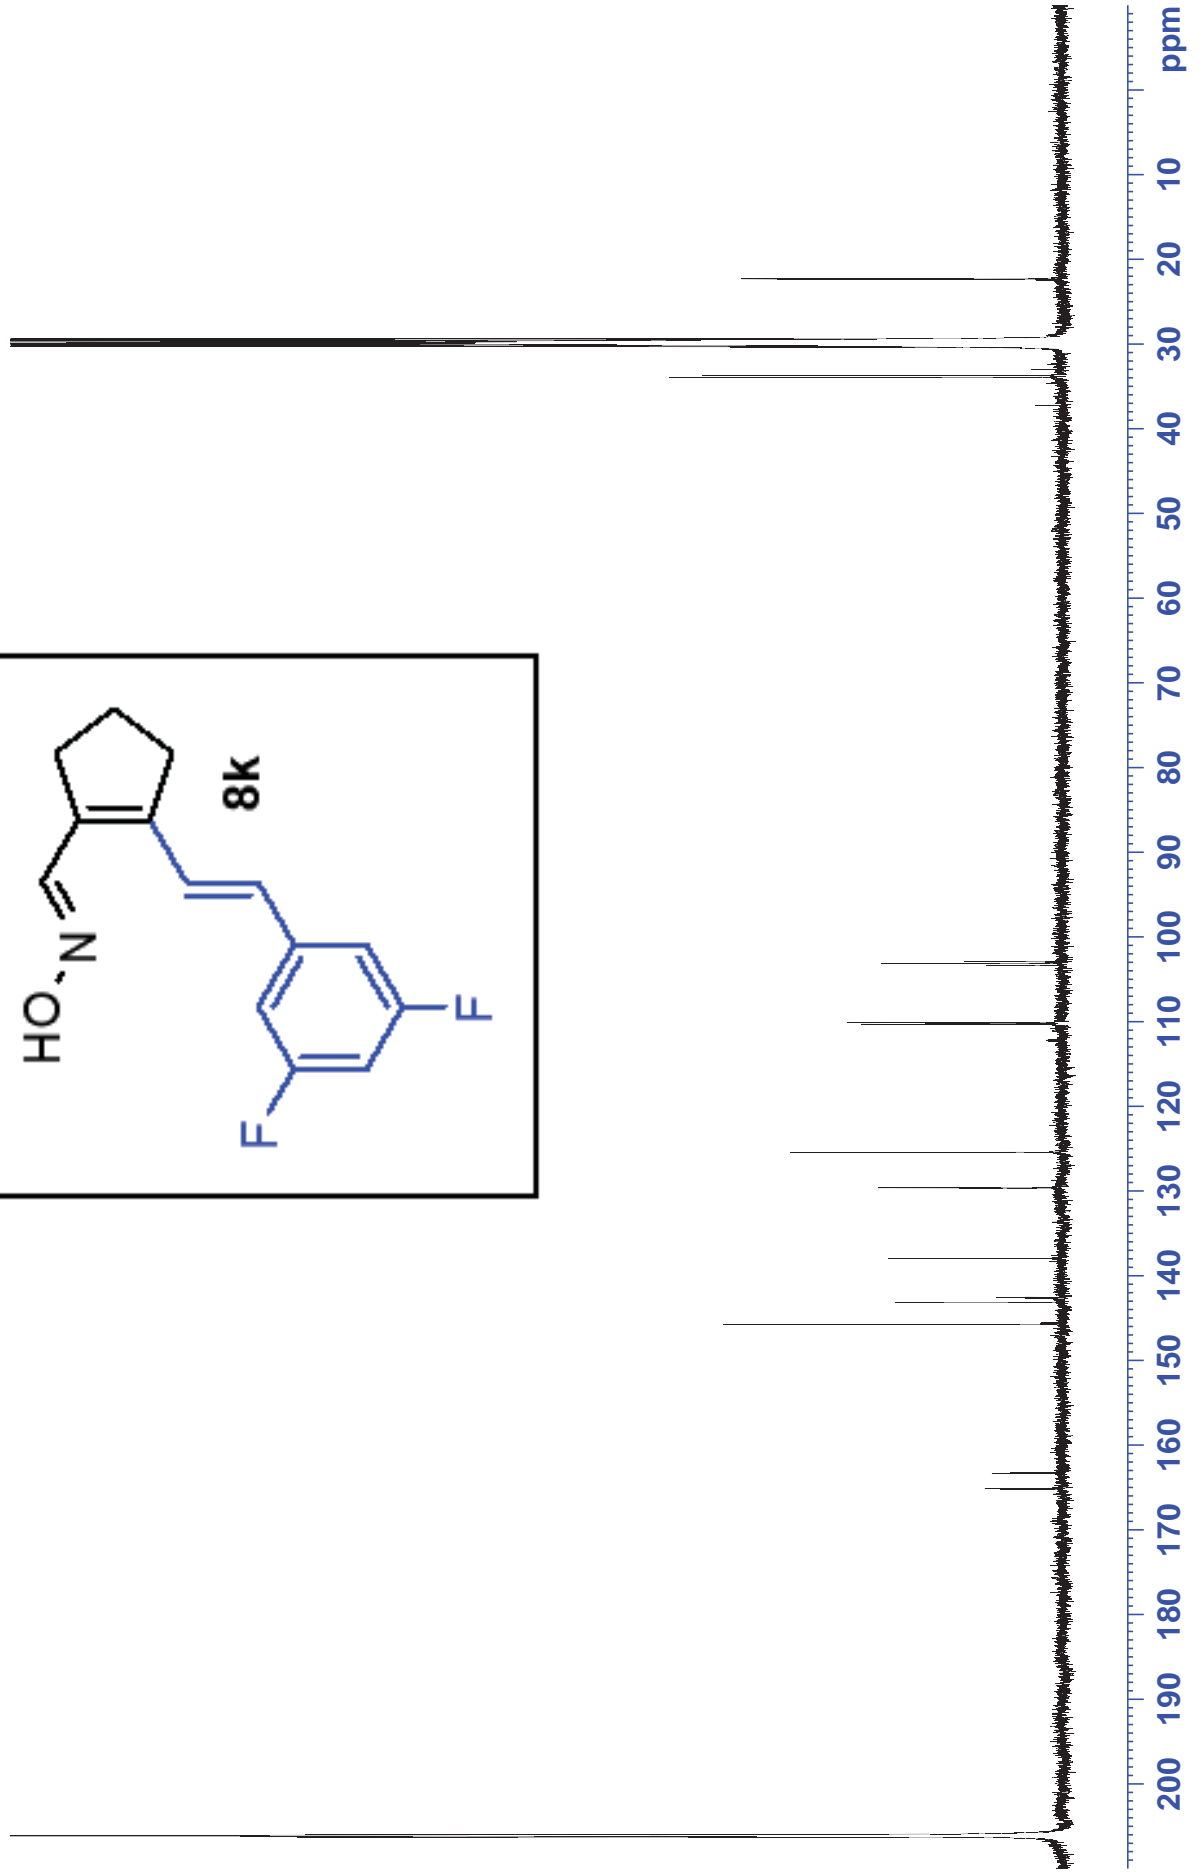



JWC-FGF23-A-33 (3)  
MD-3-A23

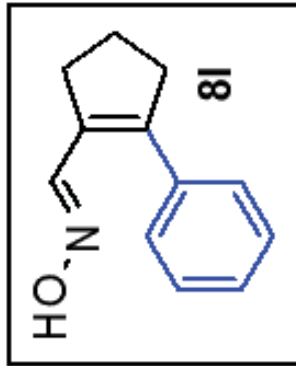

S109

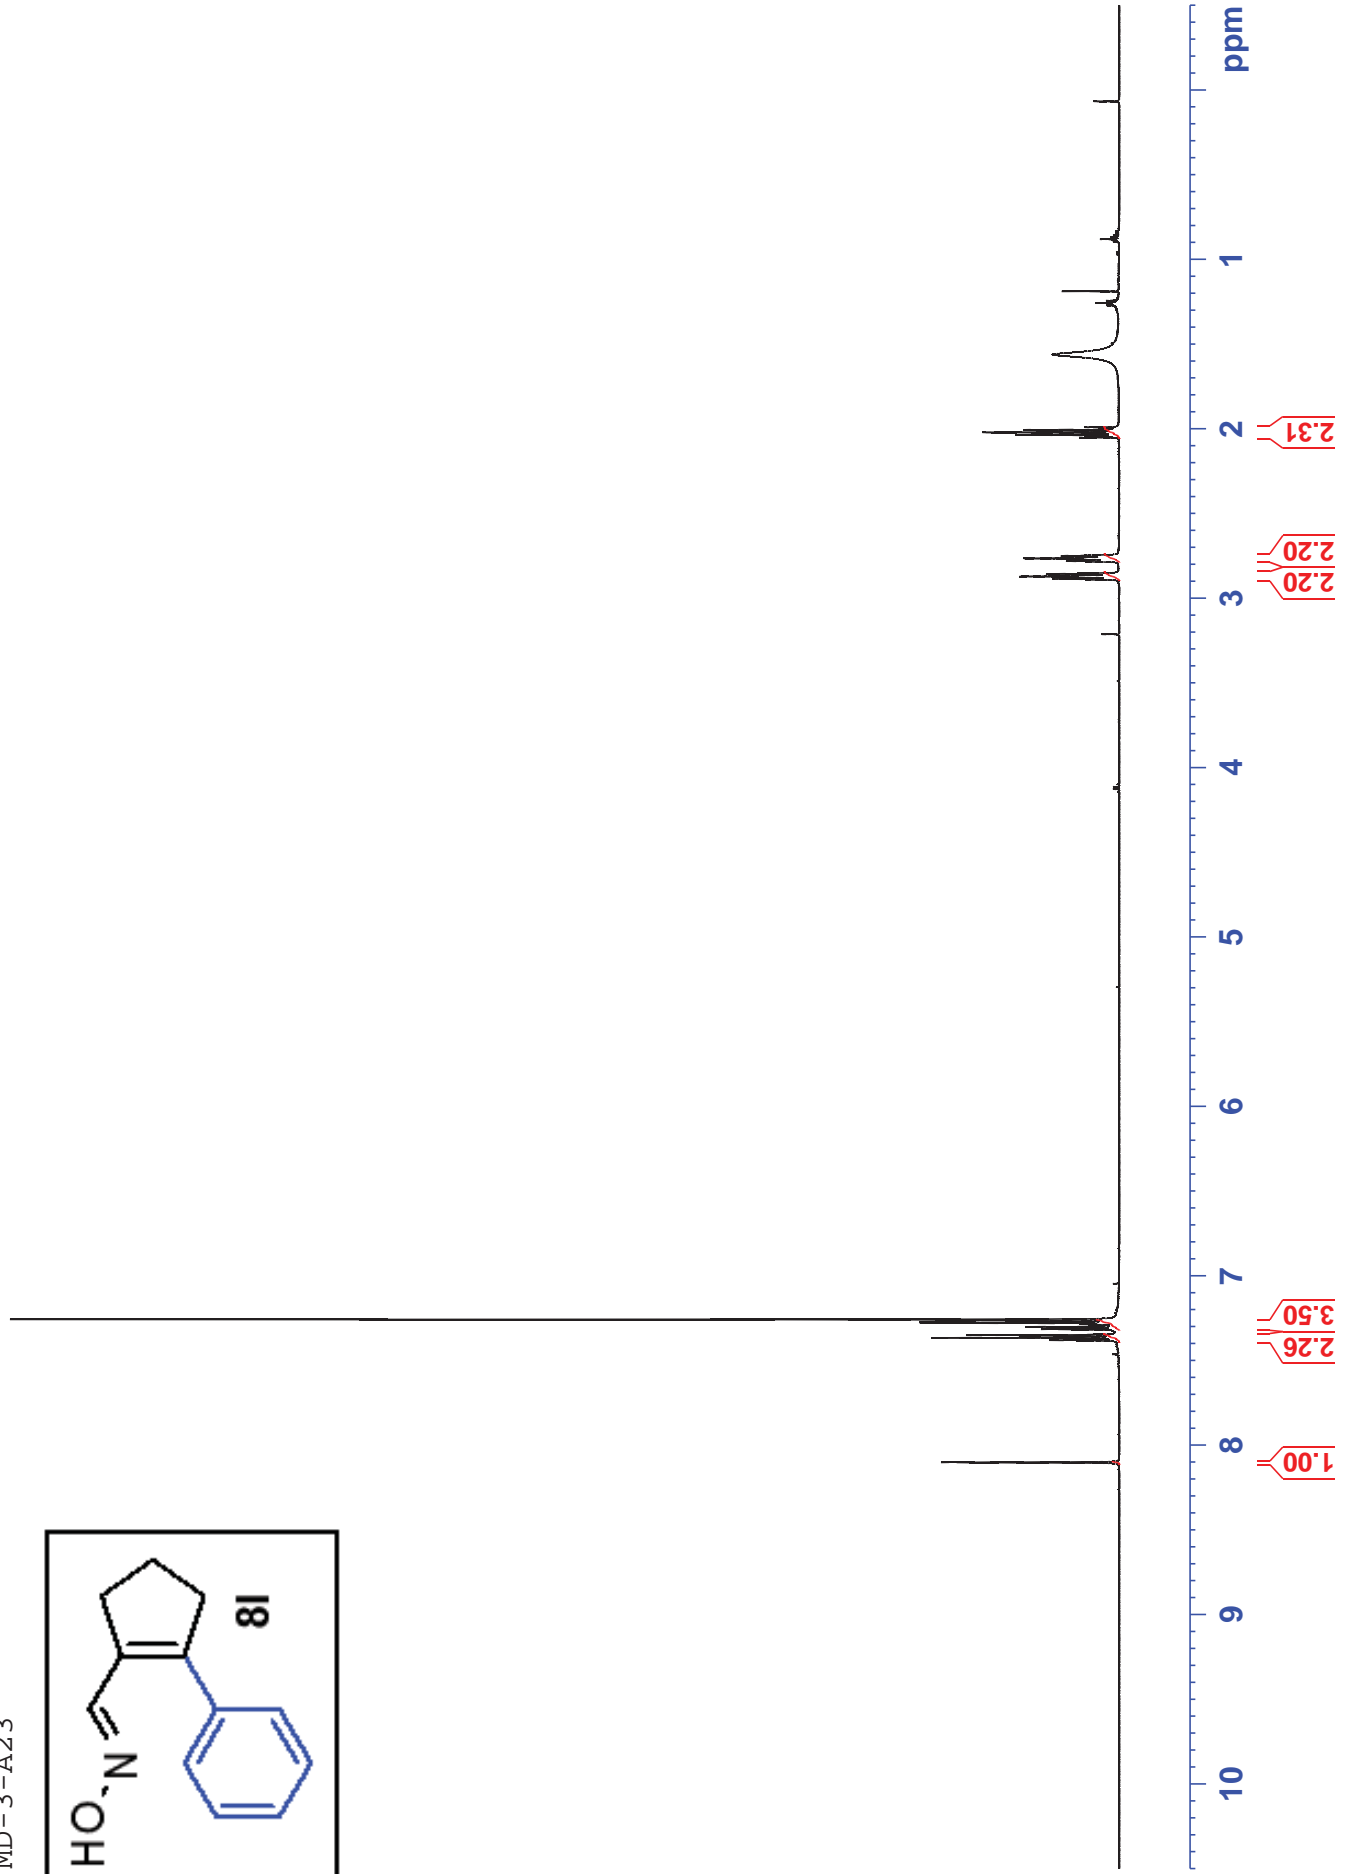

JWC-FGF23-A-33 (3)  
MD-3-A23

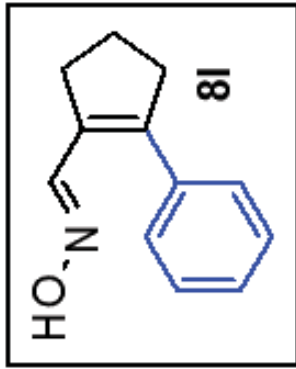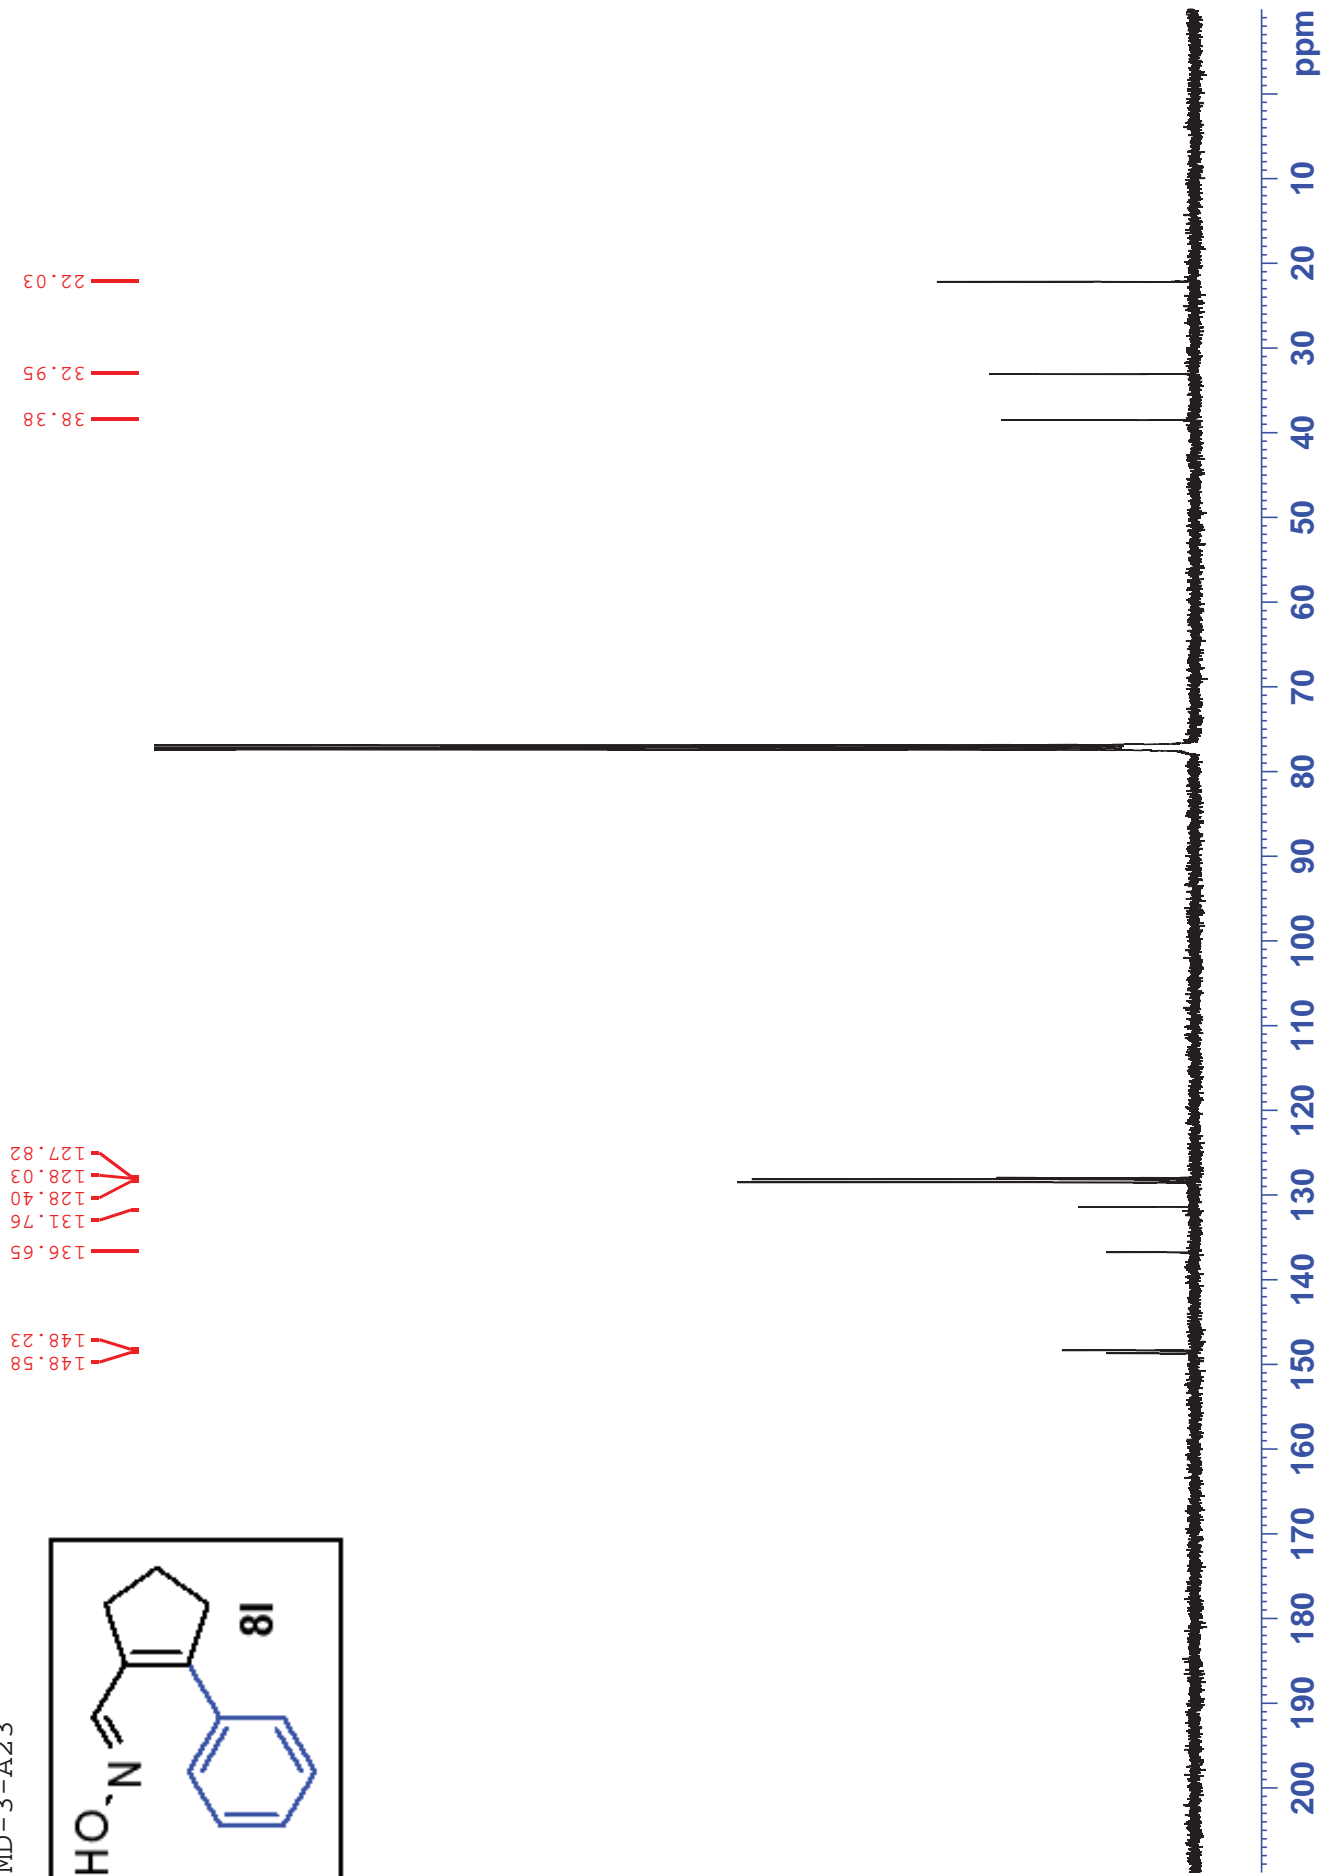

RPD-FGF23-A-103 (2)  
MD-3-A37

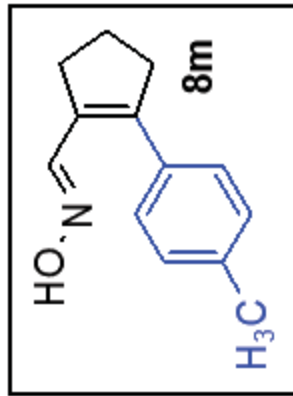

S111

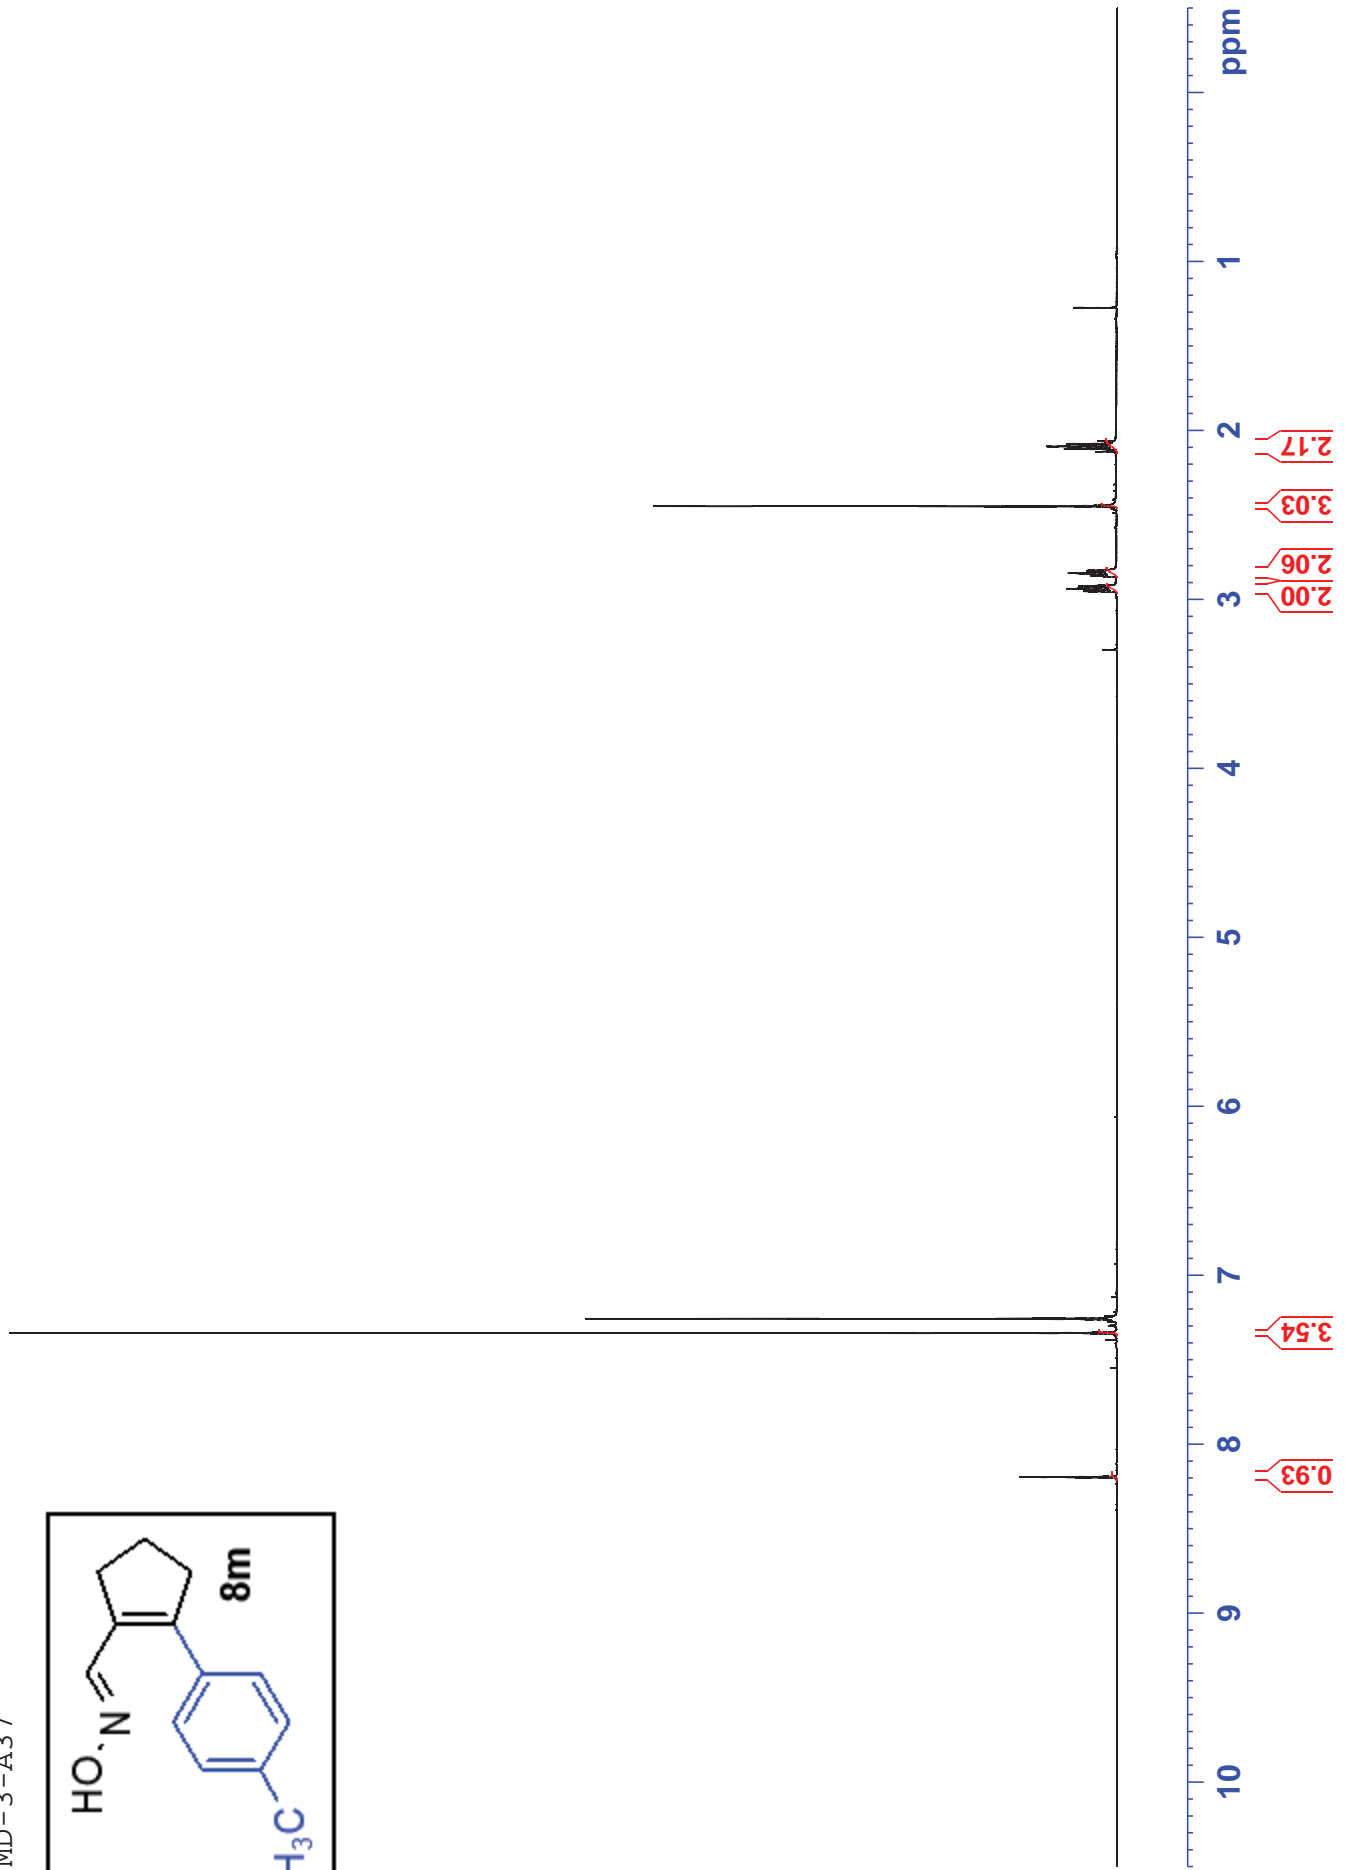

RPD-FGF23-A-103 (2)  
MD-3-A37

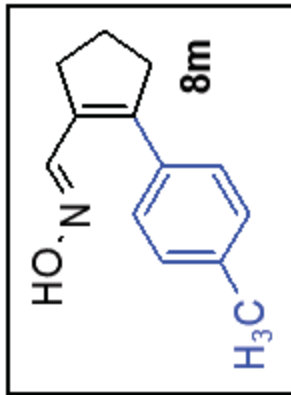

149.24  
148.47  
137.94  
133.77  
130.67  
129.23  
128.08

38.49

33.07

22.13  
21.36

200 190 180 170 160 150 140 130 120 110 100 90 80 70 60 50 40 30 20 10 ppm

JWC-FGF23-A-55 (3)  
MD-3-A38

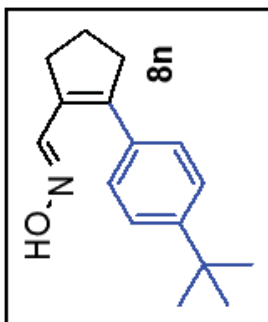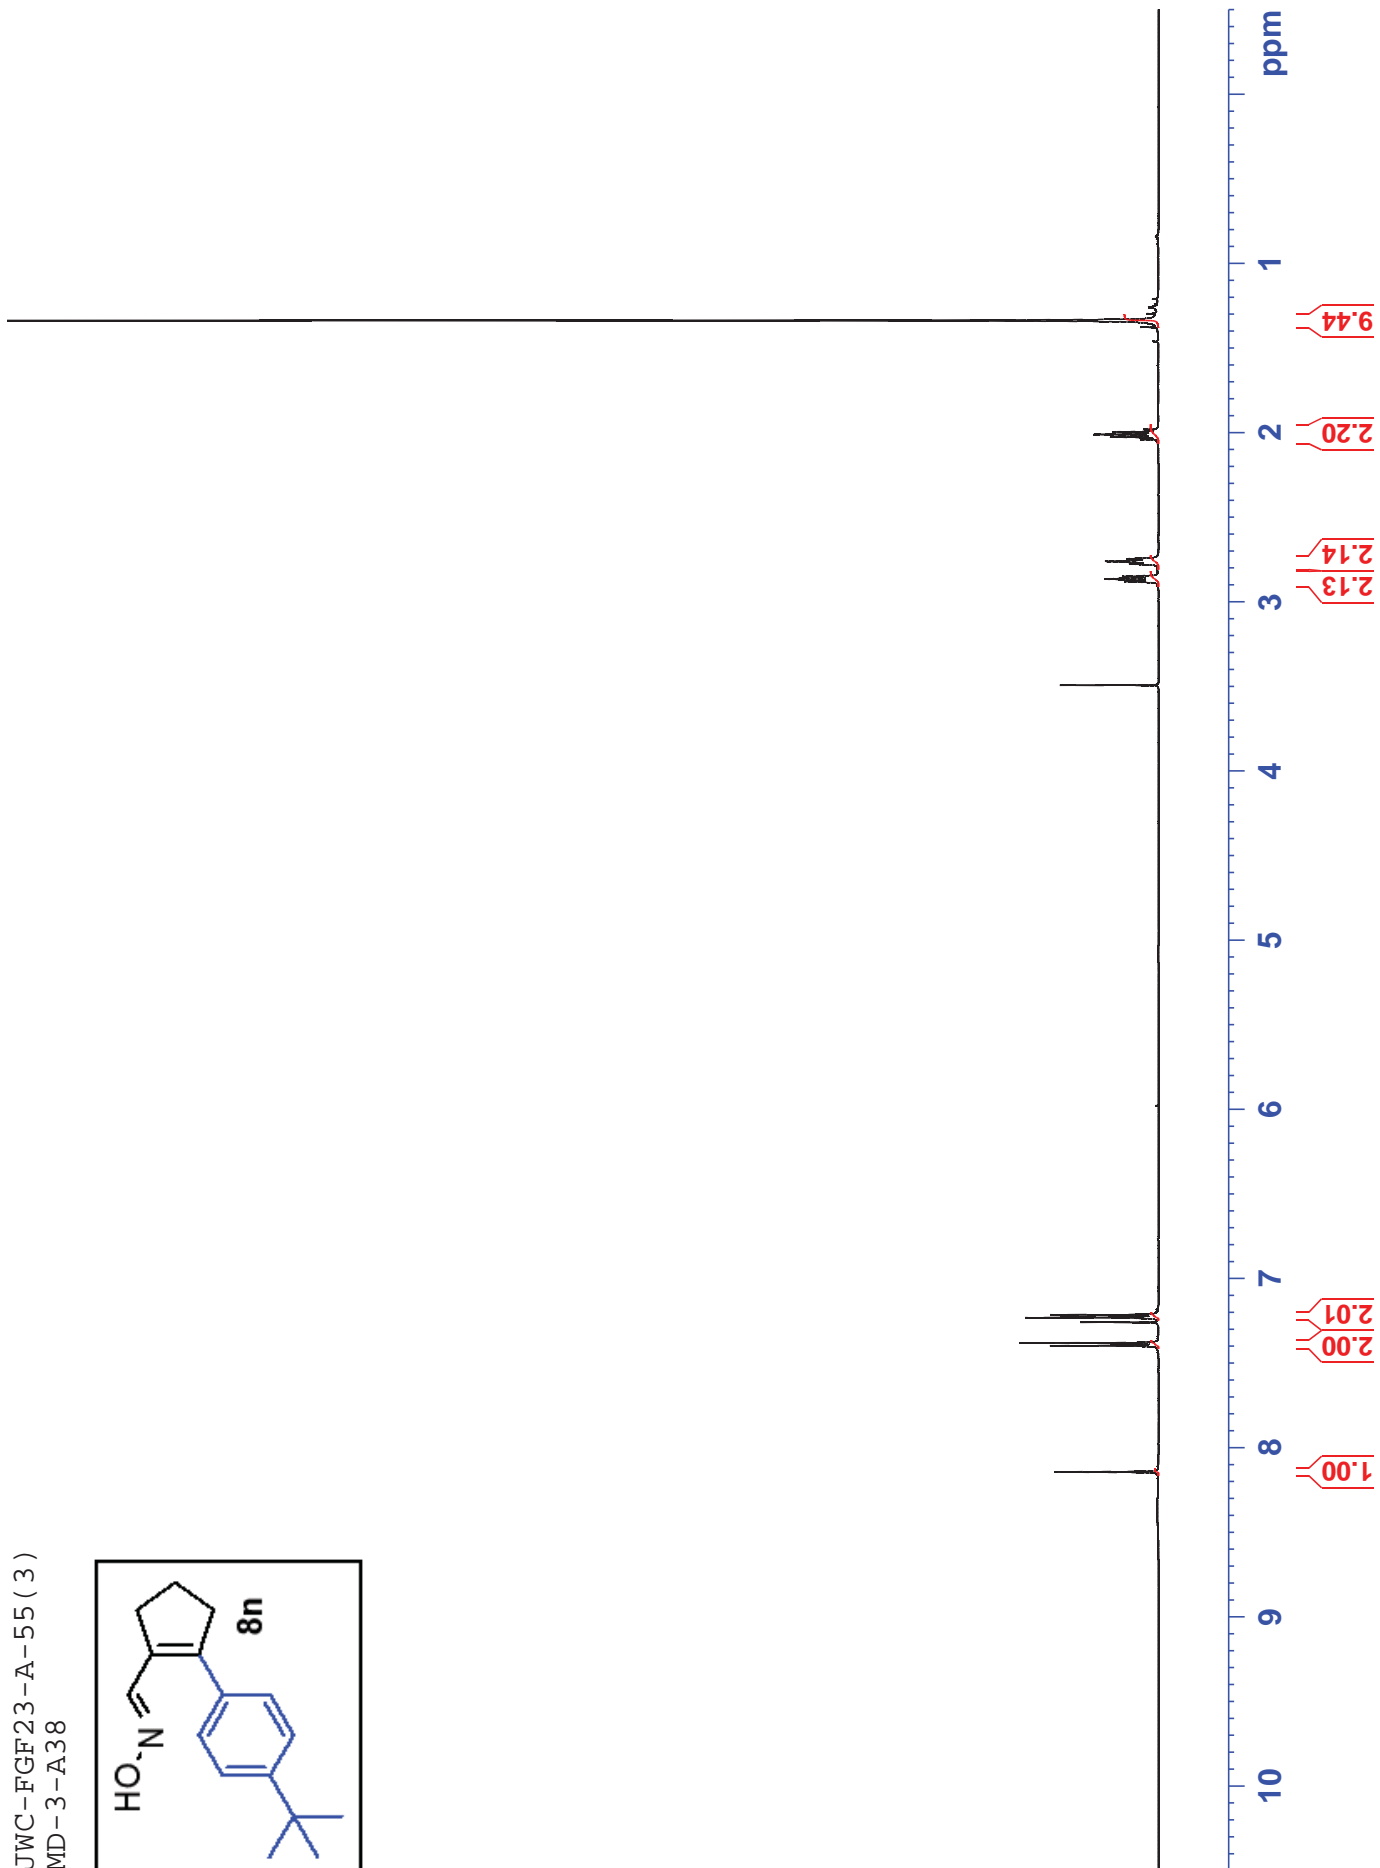

JWC-FGF23-A-101 (5)  
MD-3-A38

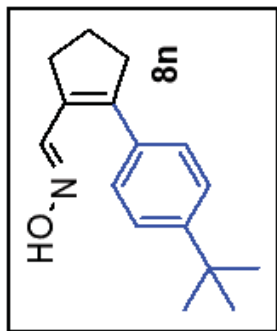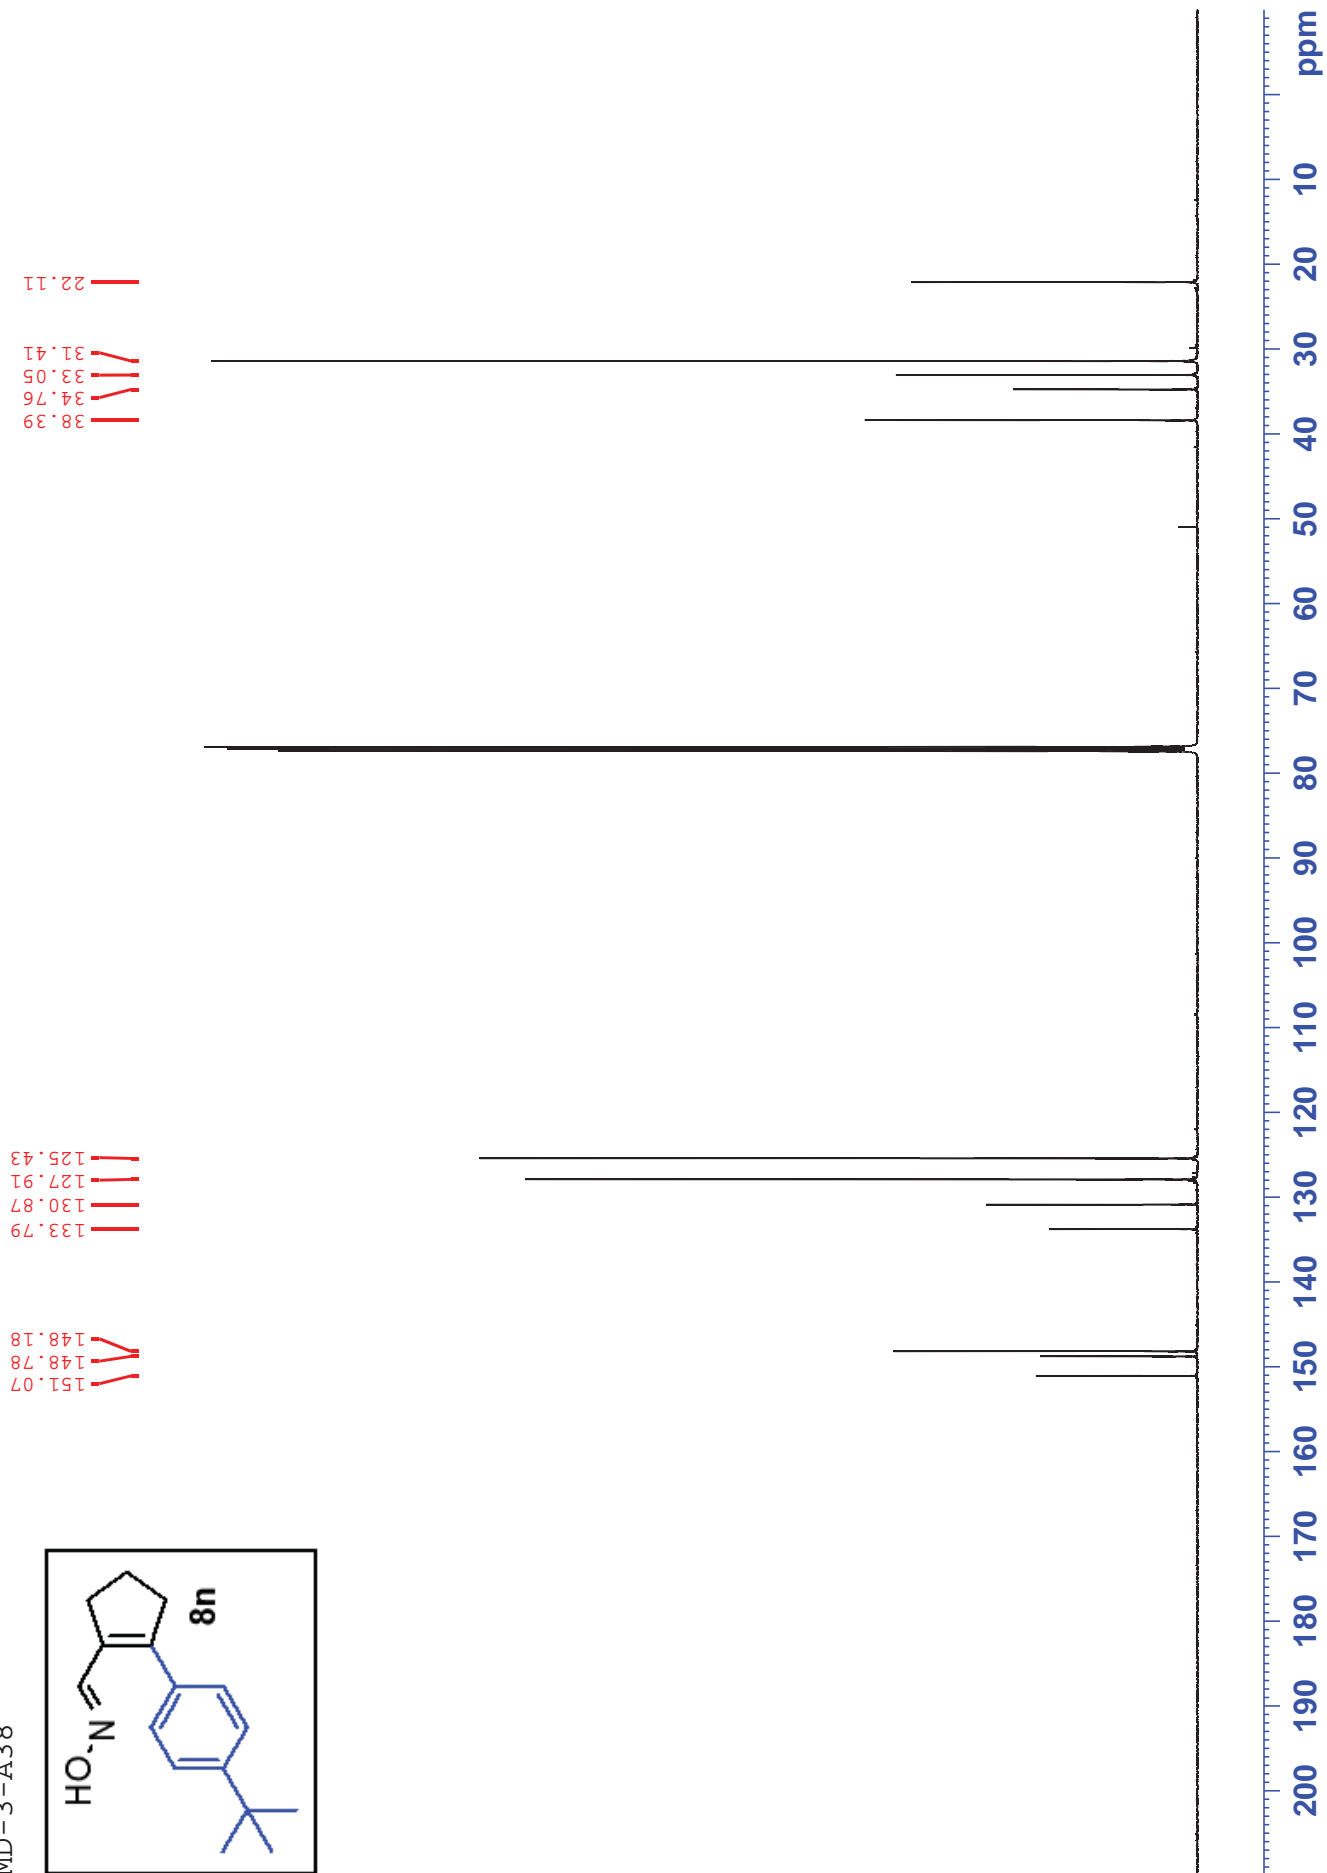

RPD-FGF23-A-99 (4)  
MD-3-A36

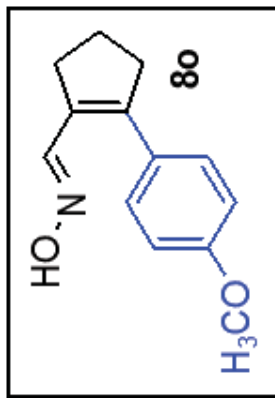

S115

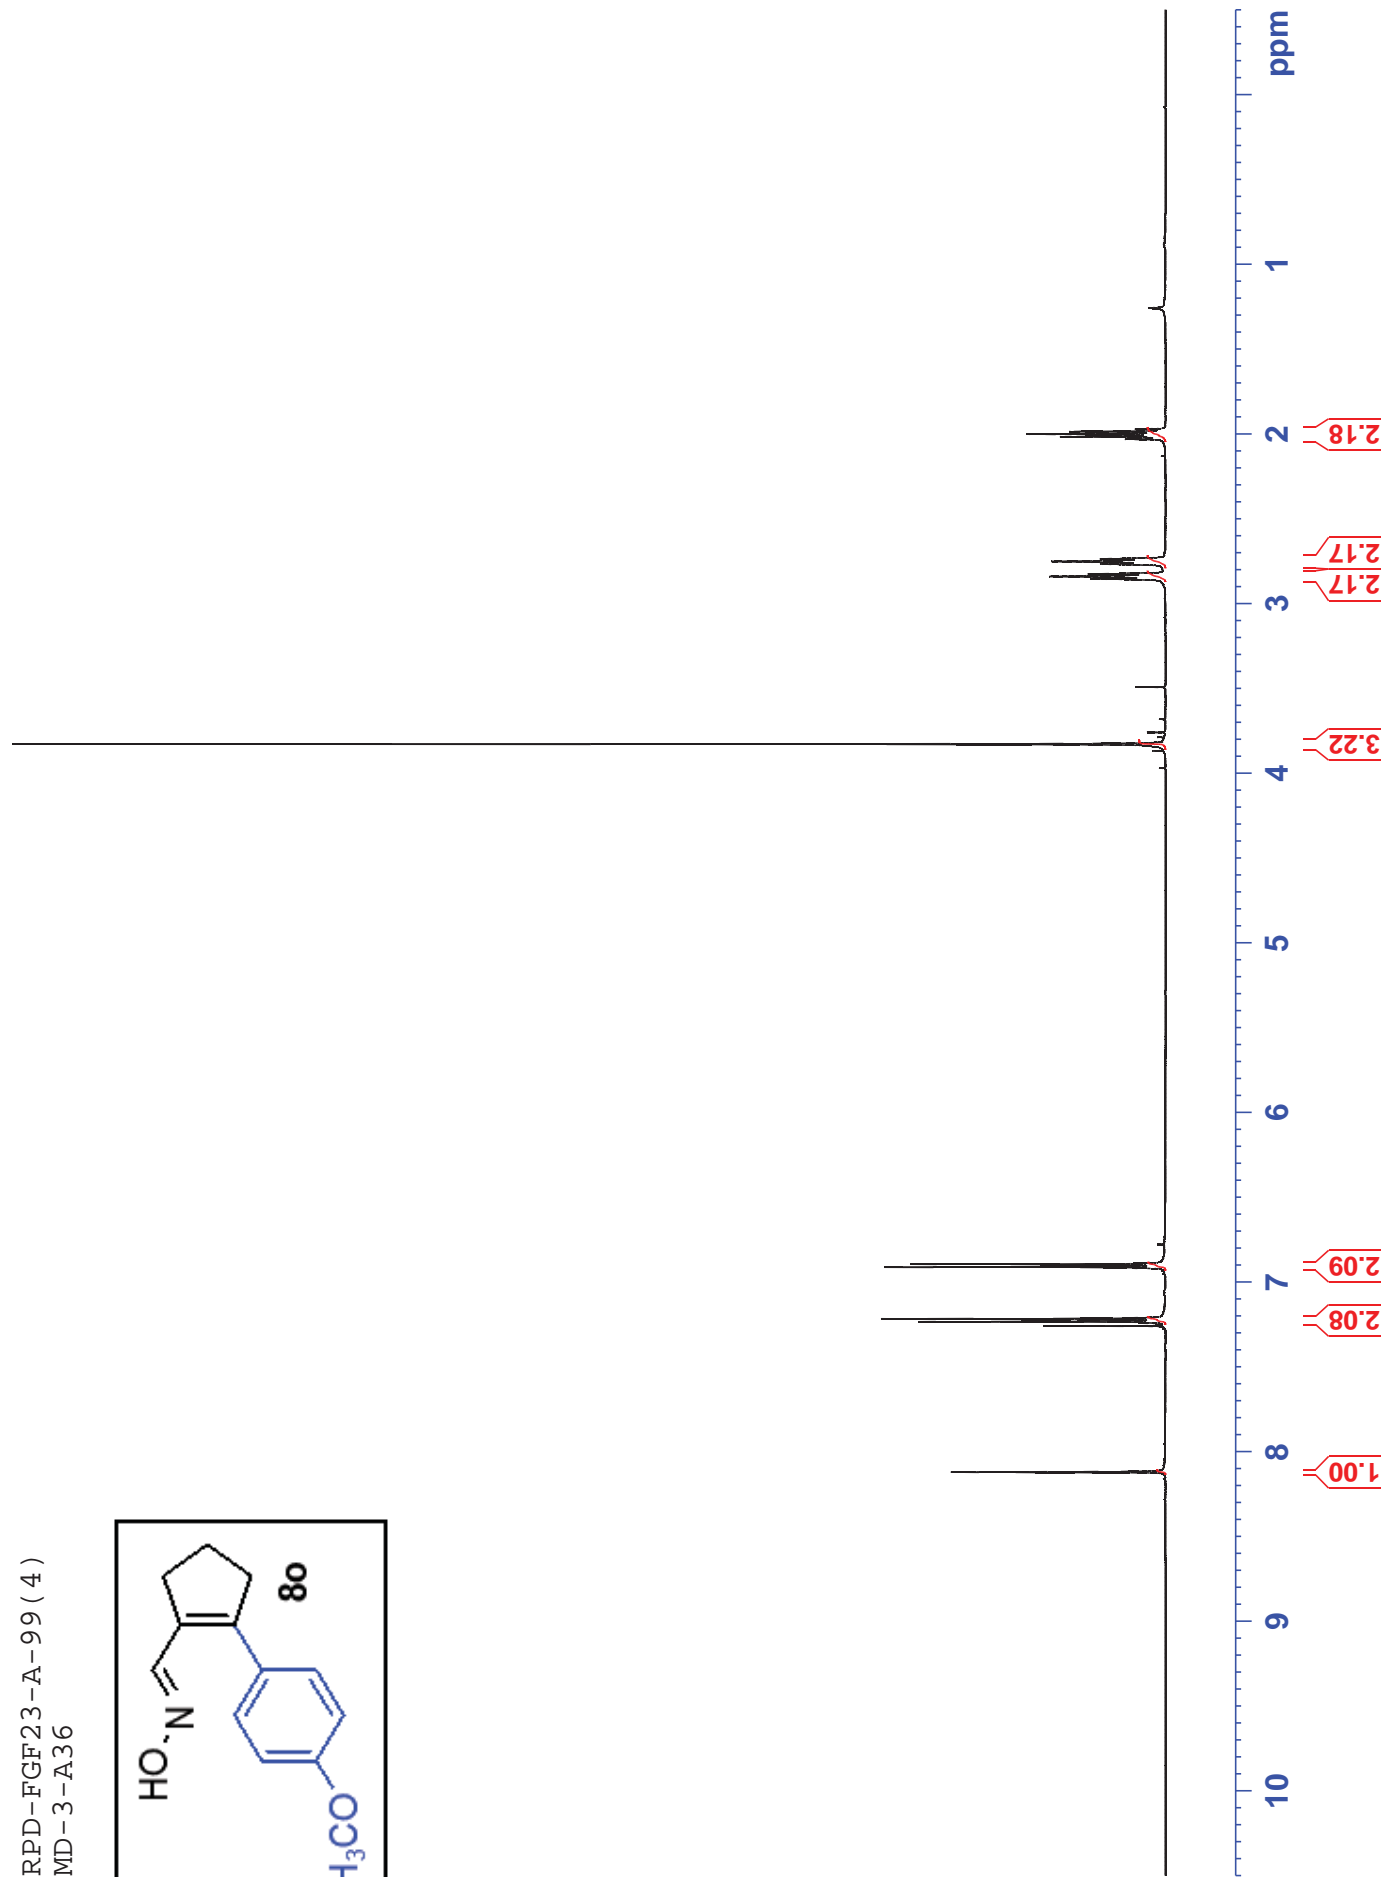

RPD-FGF23-A-99 (4)  
MD-3-A36

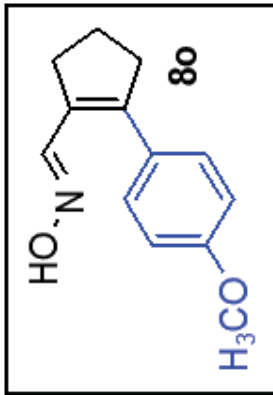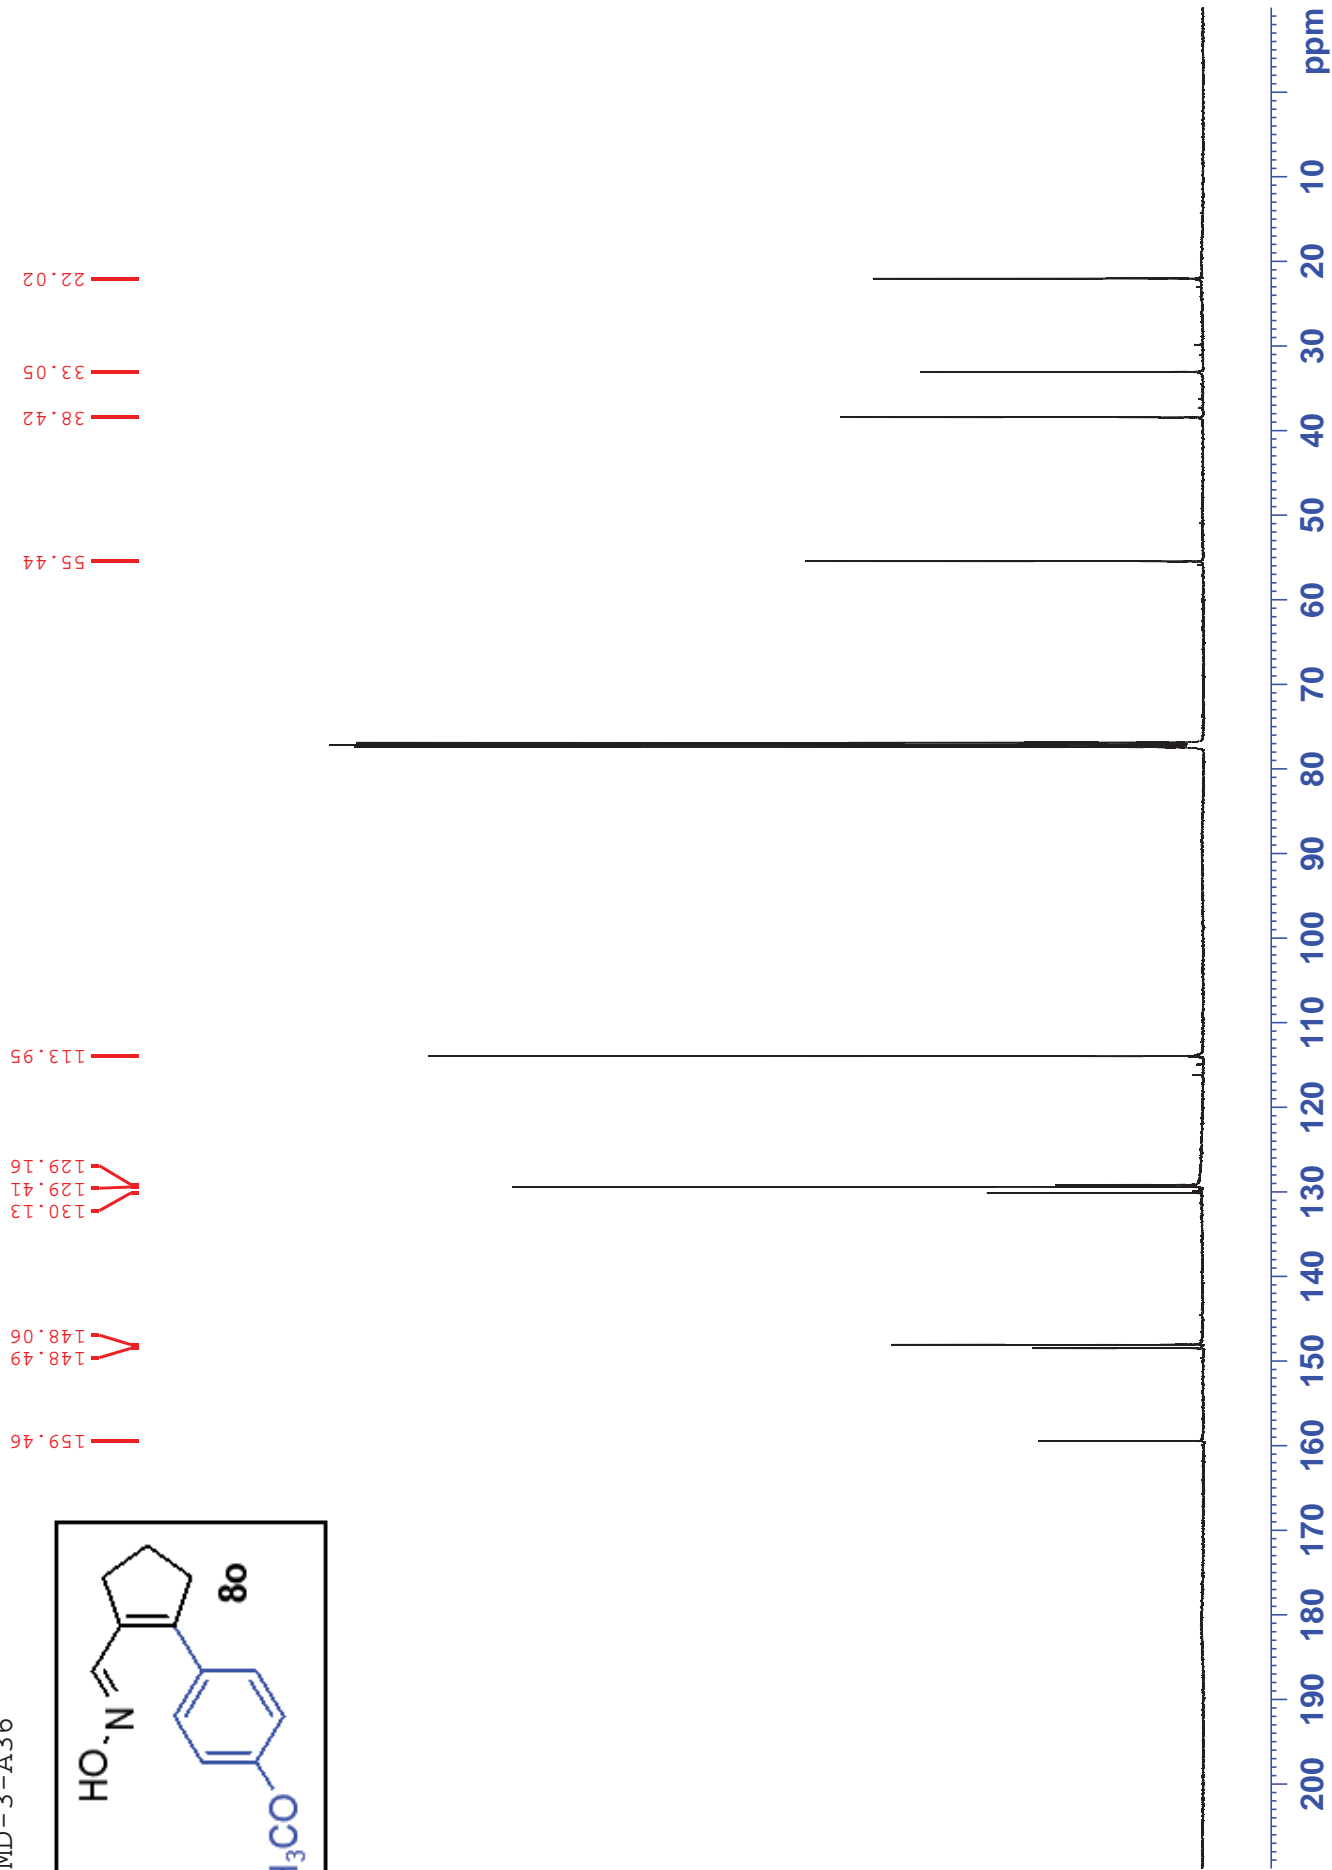



RPD-FGF23-A-101 (5)  
MD-3-A39

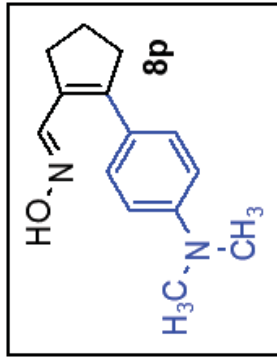

S117

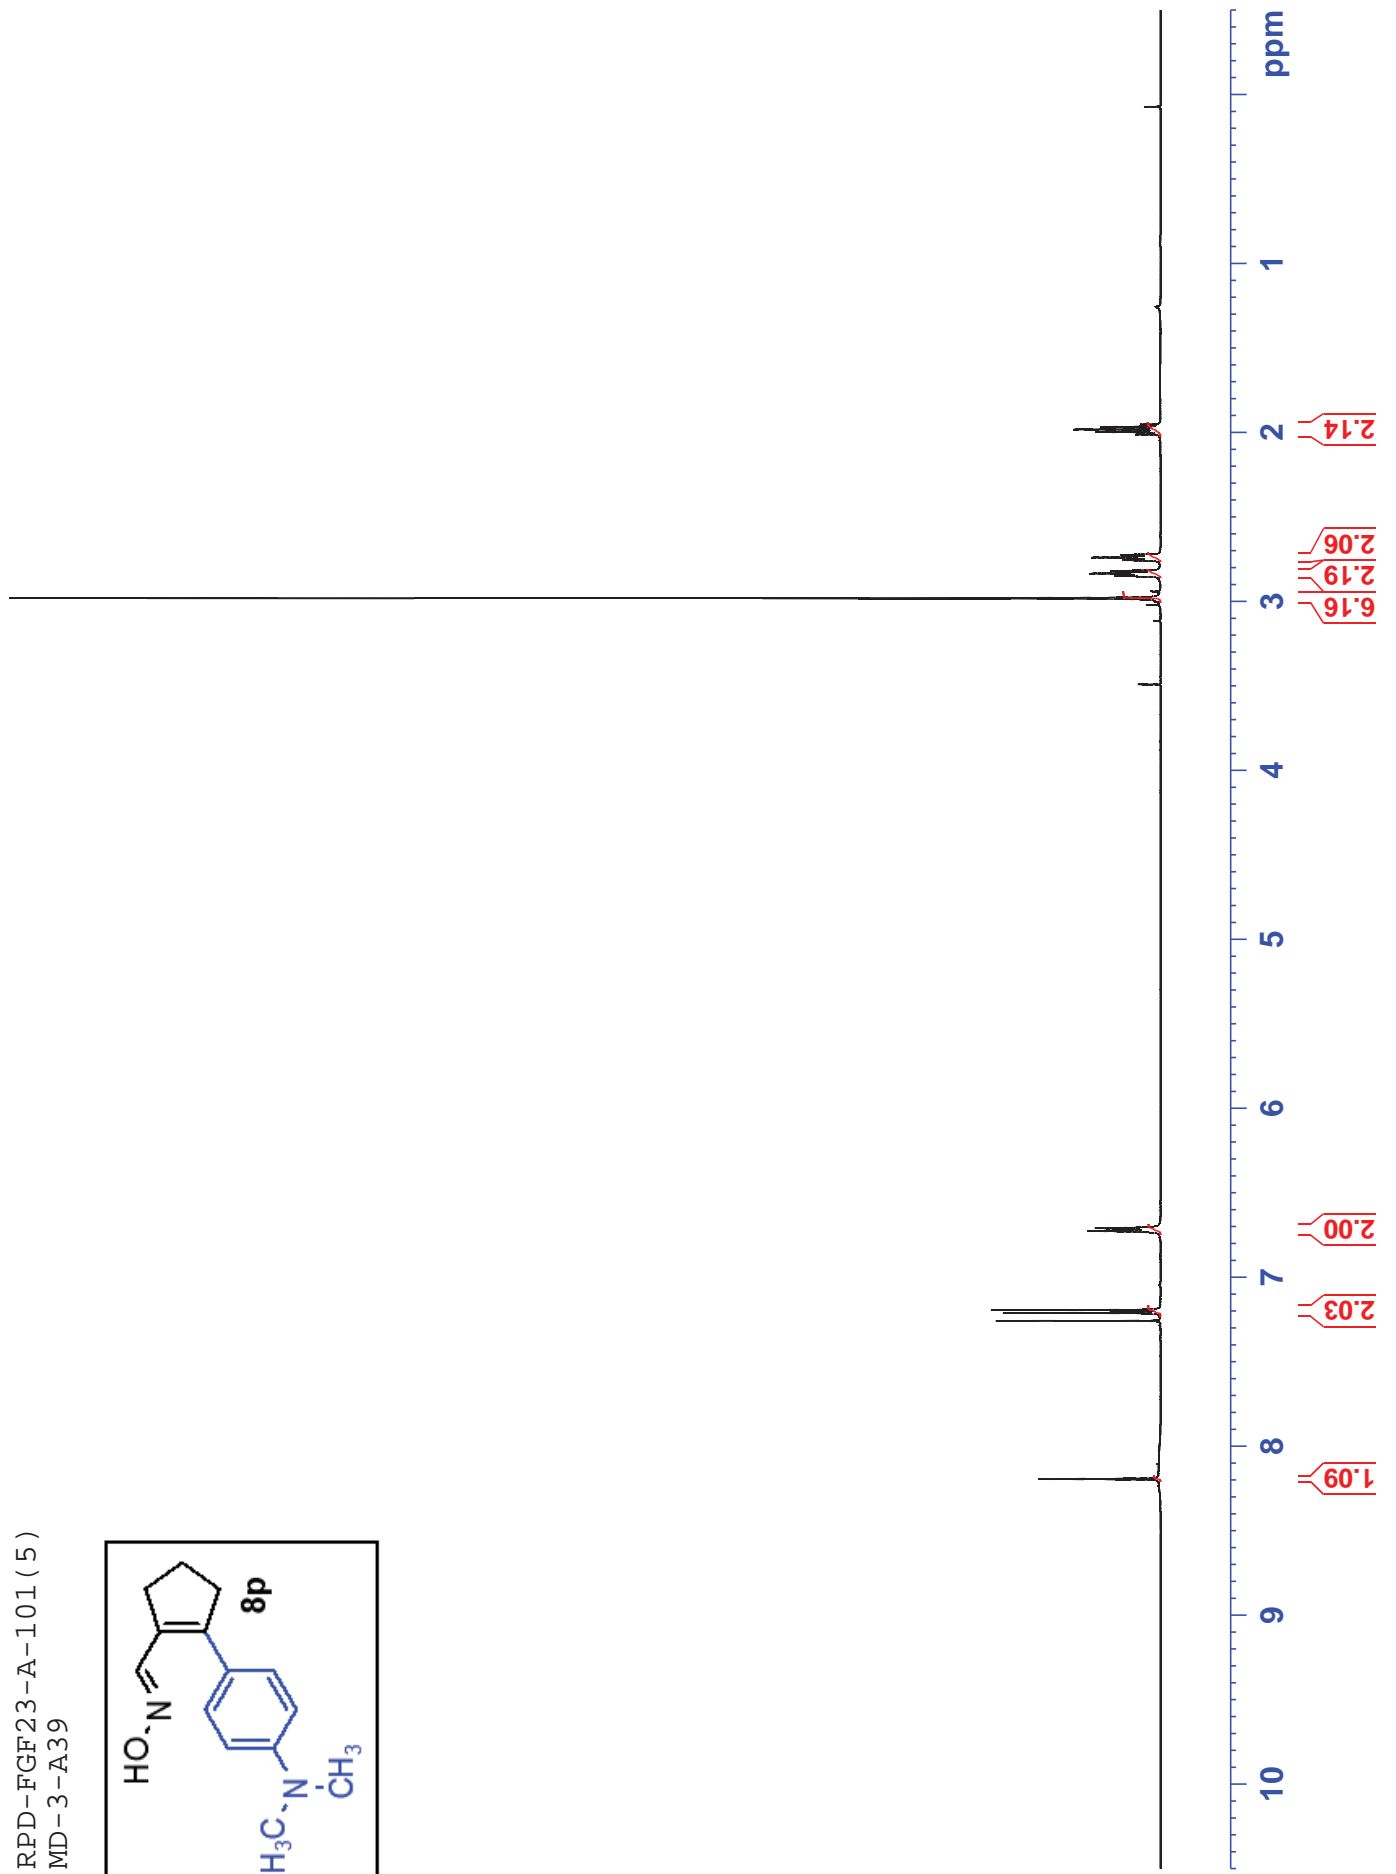

RPD-FGF23-A-105 (2)  
MD-3-A39

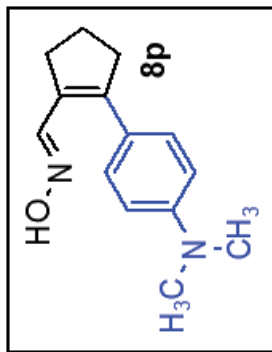

40.59  
38.15  
33.11  
22.03

112.22

129.22  
128.65

150.20  
148.81  
148.65  
148.59

200 190 180 170 160 150 140 130 120 110 100 90 80 70 60 50 40 30 20 10 ppm



JWC-FGF23-A-45 (5)  
MD-3-A27

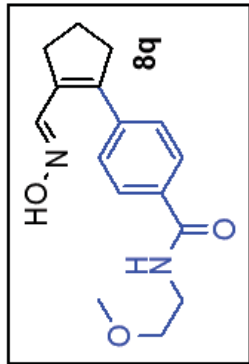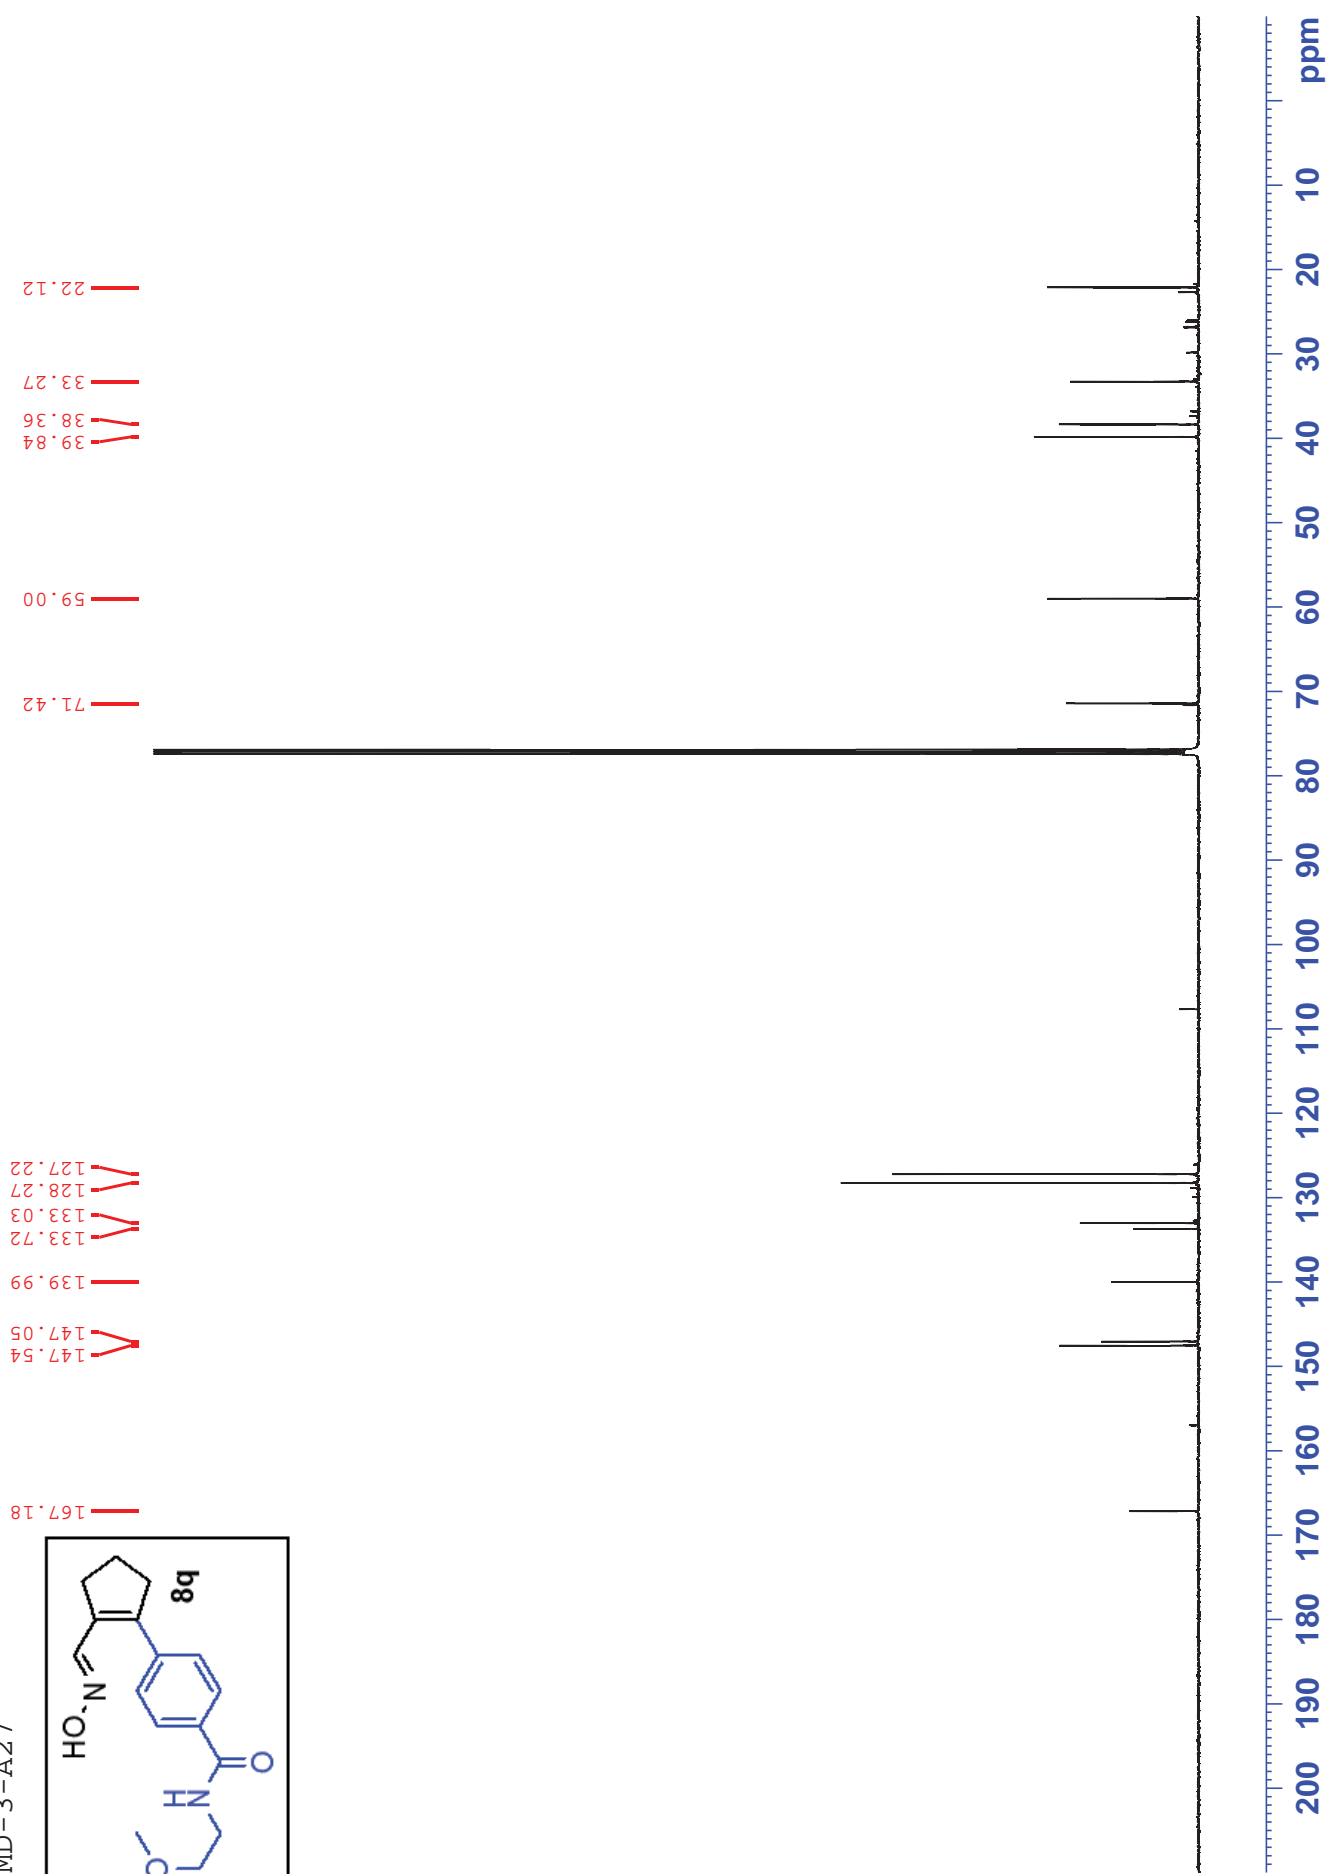

RPD-FGF23-A-105 (2)  
MD-3-A40

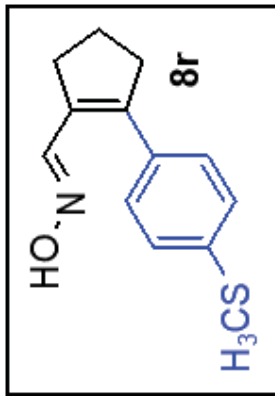

S121

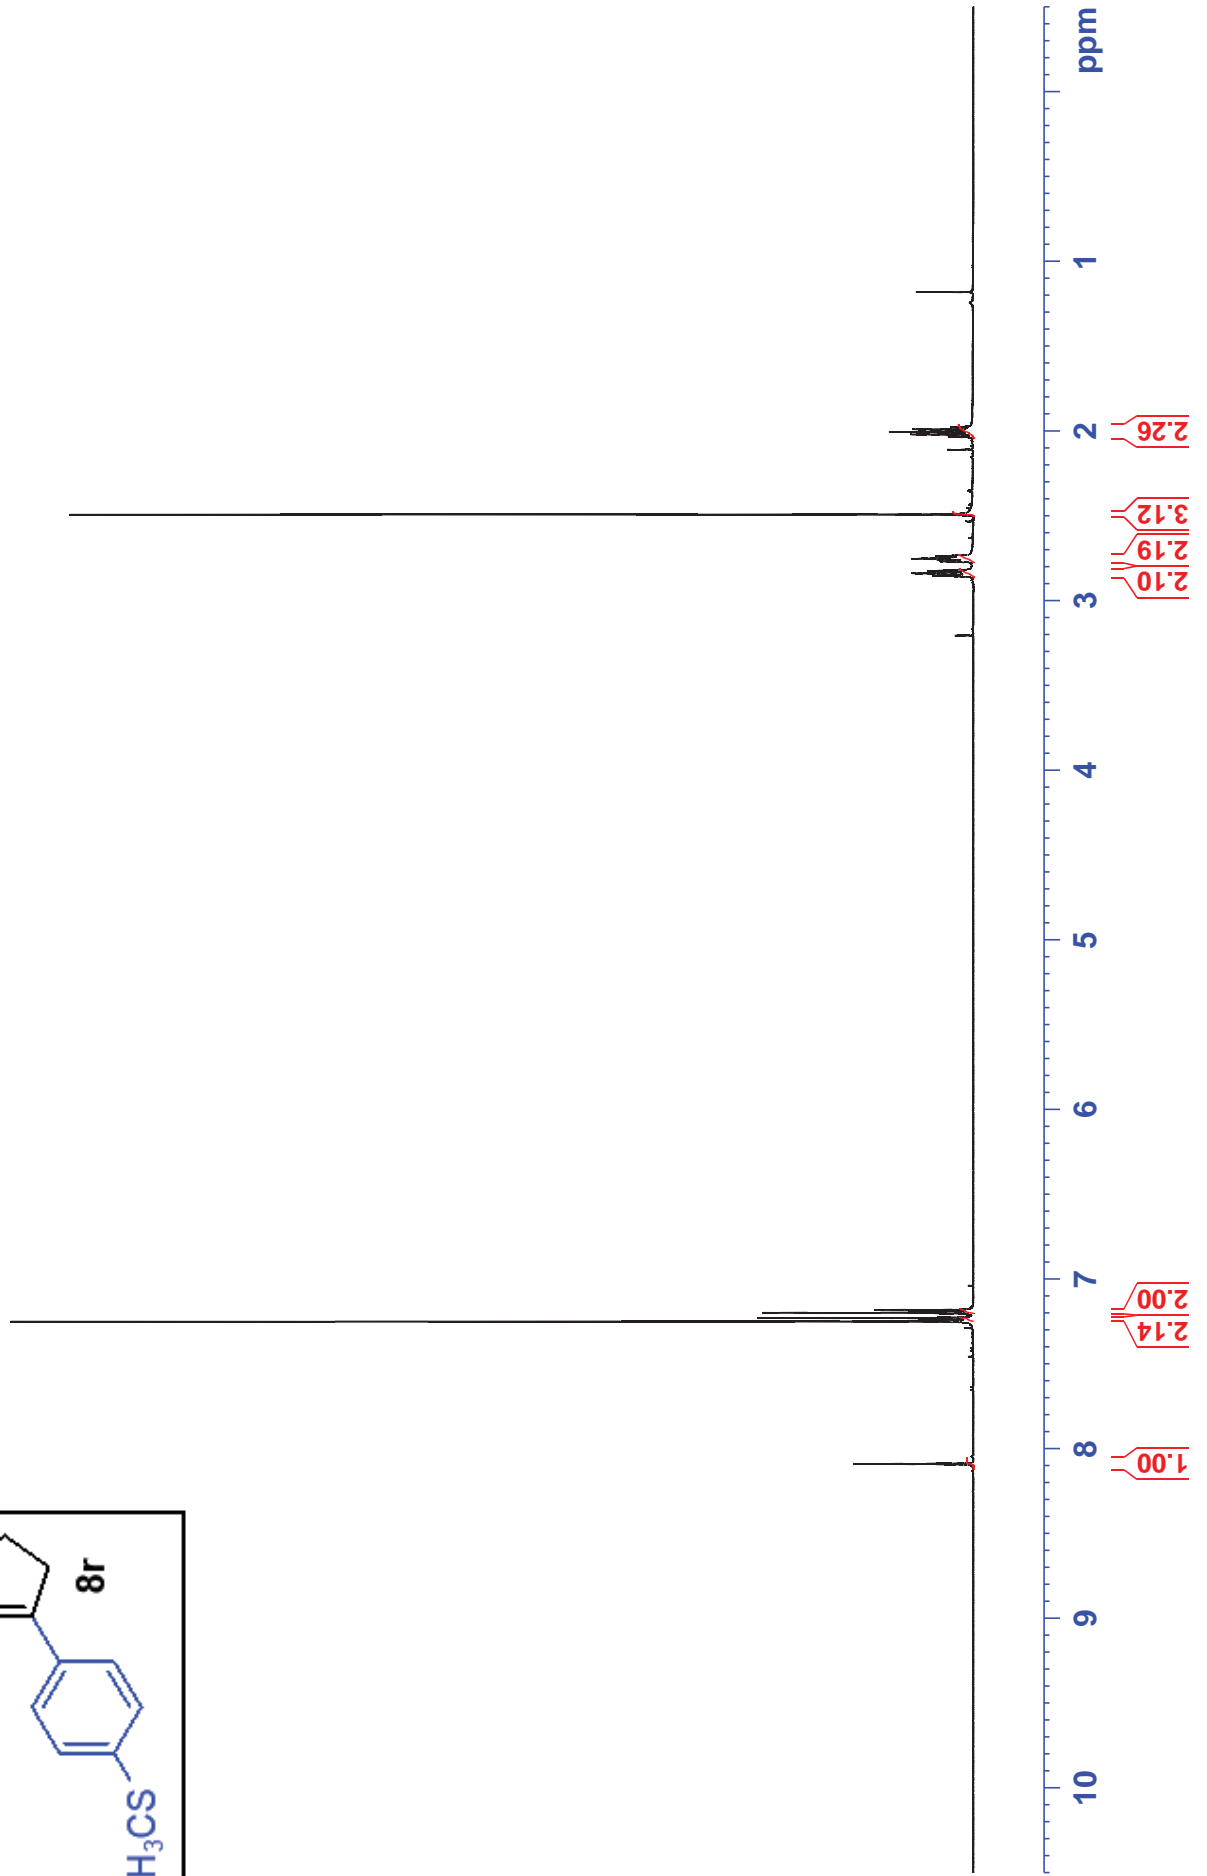

RPD-FGF23-A-105 (2)  
MD-3-A40

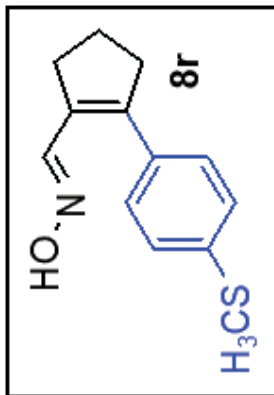

148.33  
148.16  
138.57  
133.36  
131.15  
128.56  
126.40

38.32

33.11

22.09

15.80

200 190 180 170 160 150 140 130 120 110 100 90 80 70 60 50 40 30 20 10 ppm

JWC-FGF23-A-57 (2)  
MD-3-A41

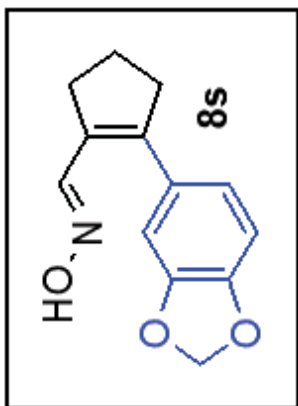

S123

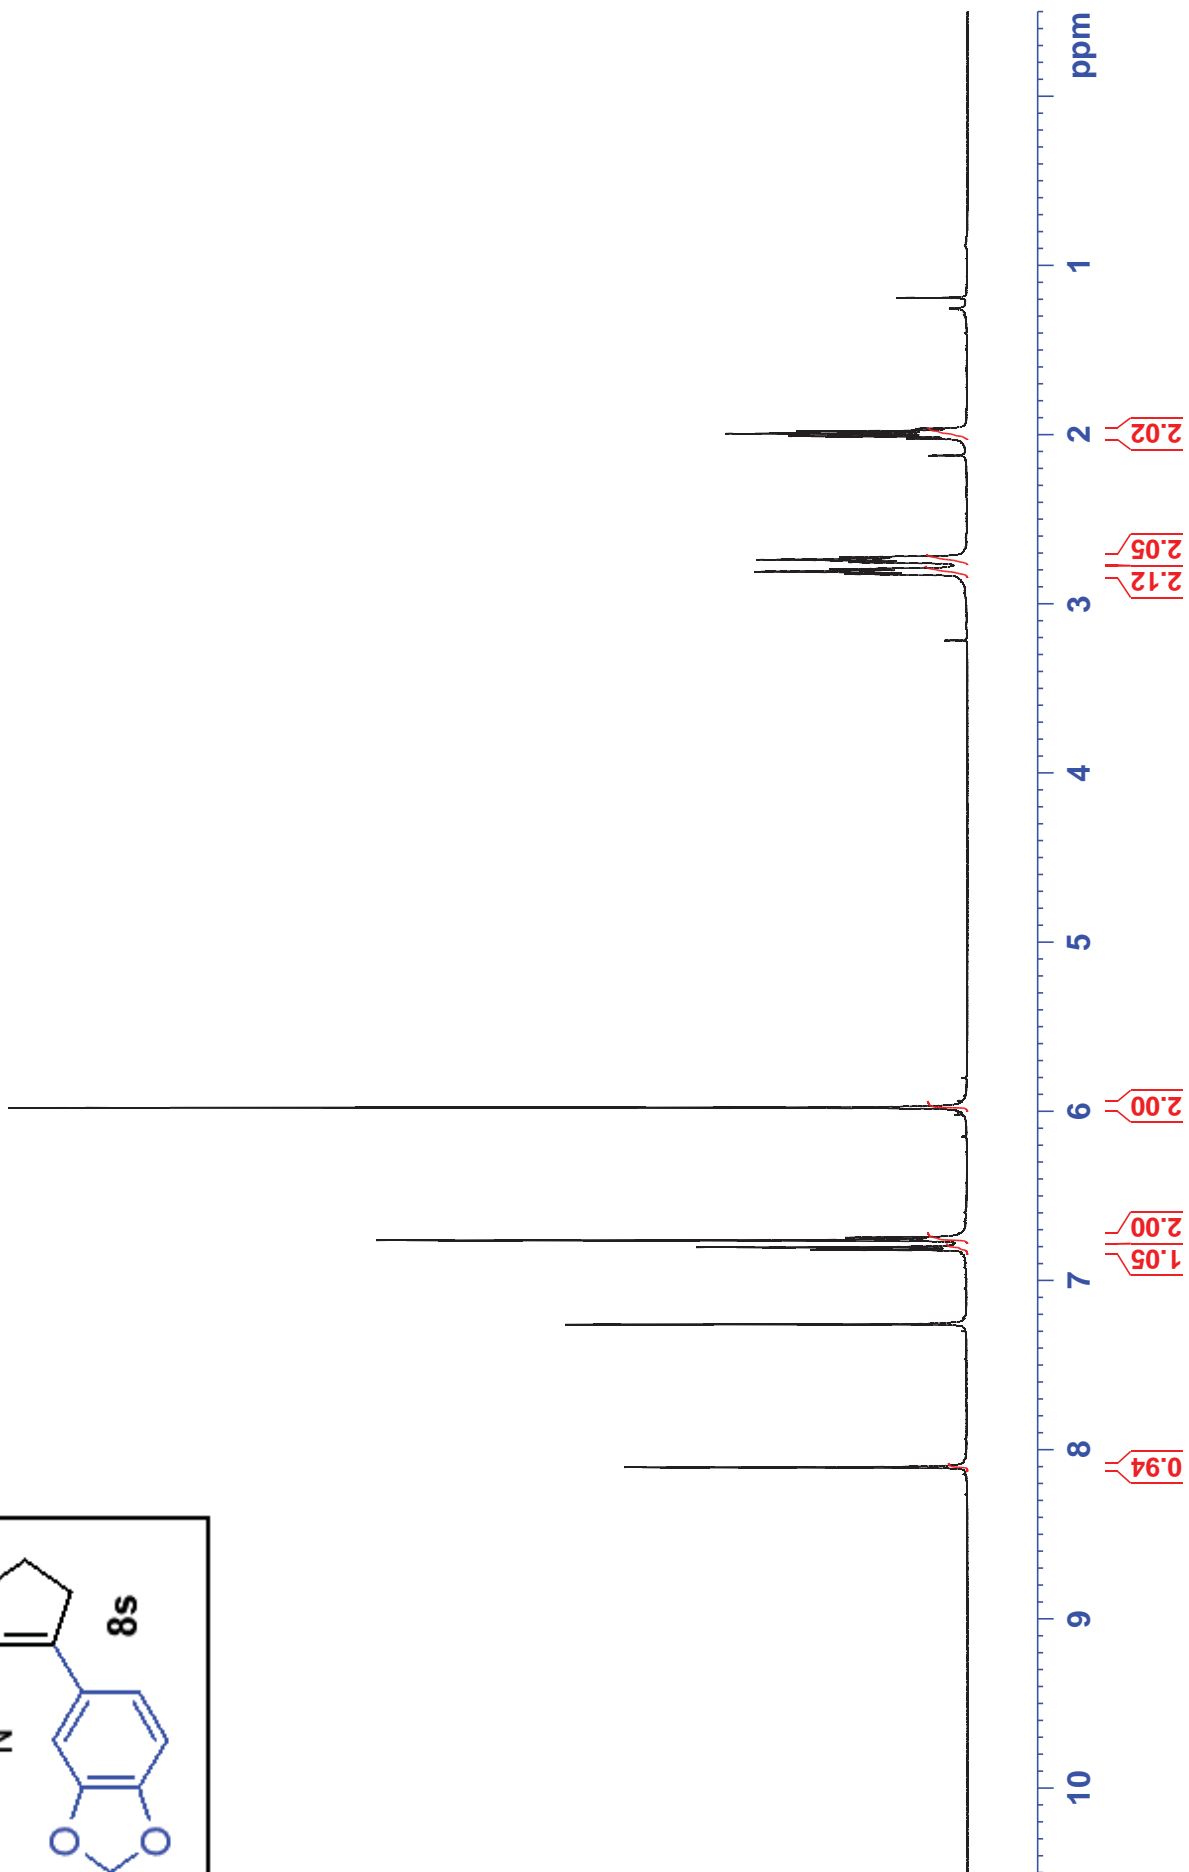

JWC-FGF23-A-57 (2)  
MD-3-A41

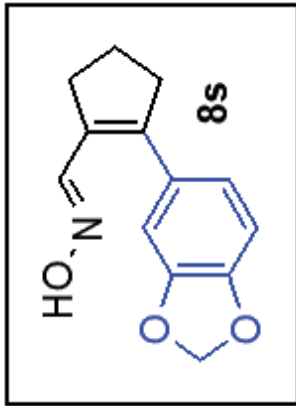

148.49  
148.12  
147.83  
147.47  
130.68  
122.03  
108.48  
108.42  
101.32  
38.63  
33.07  
22.04

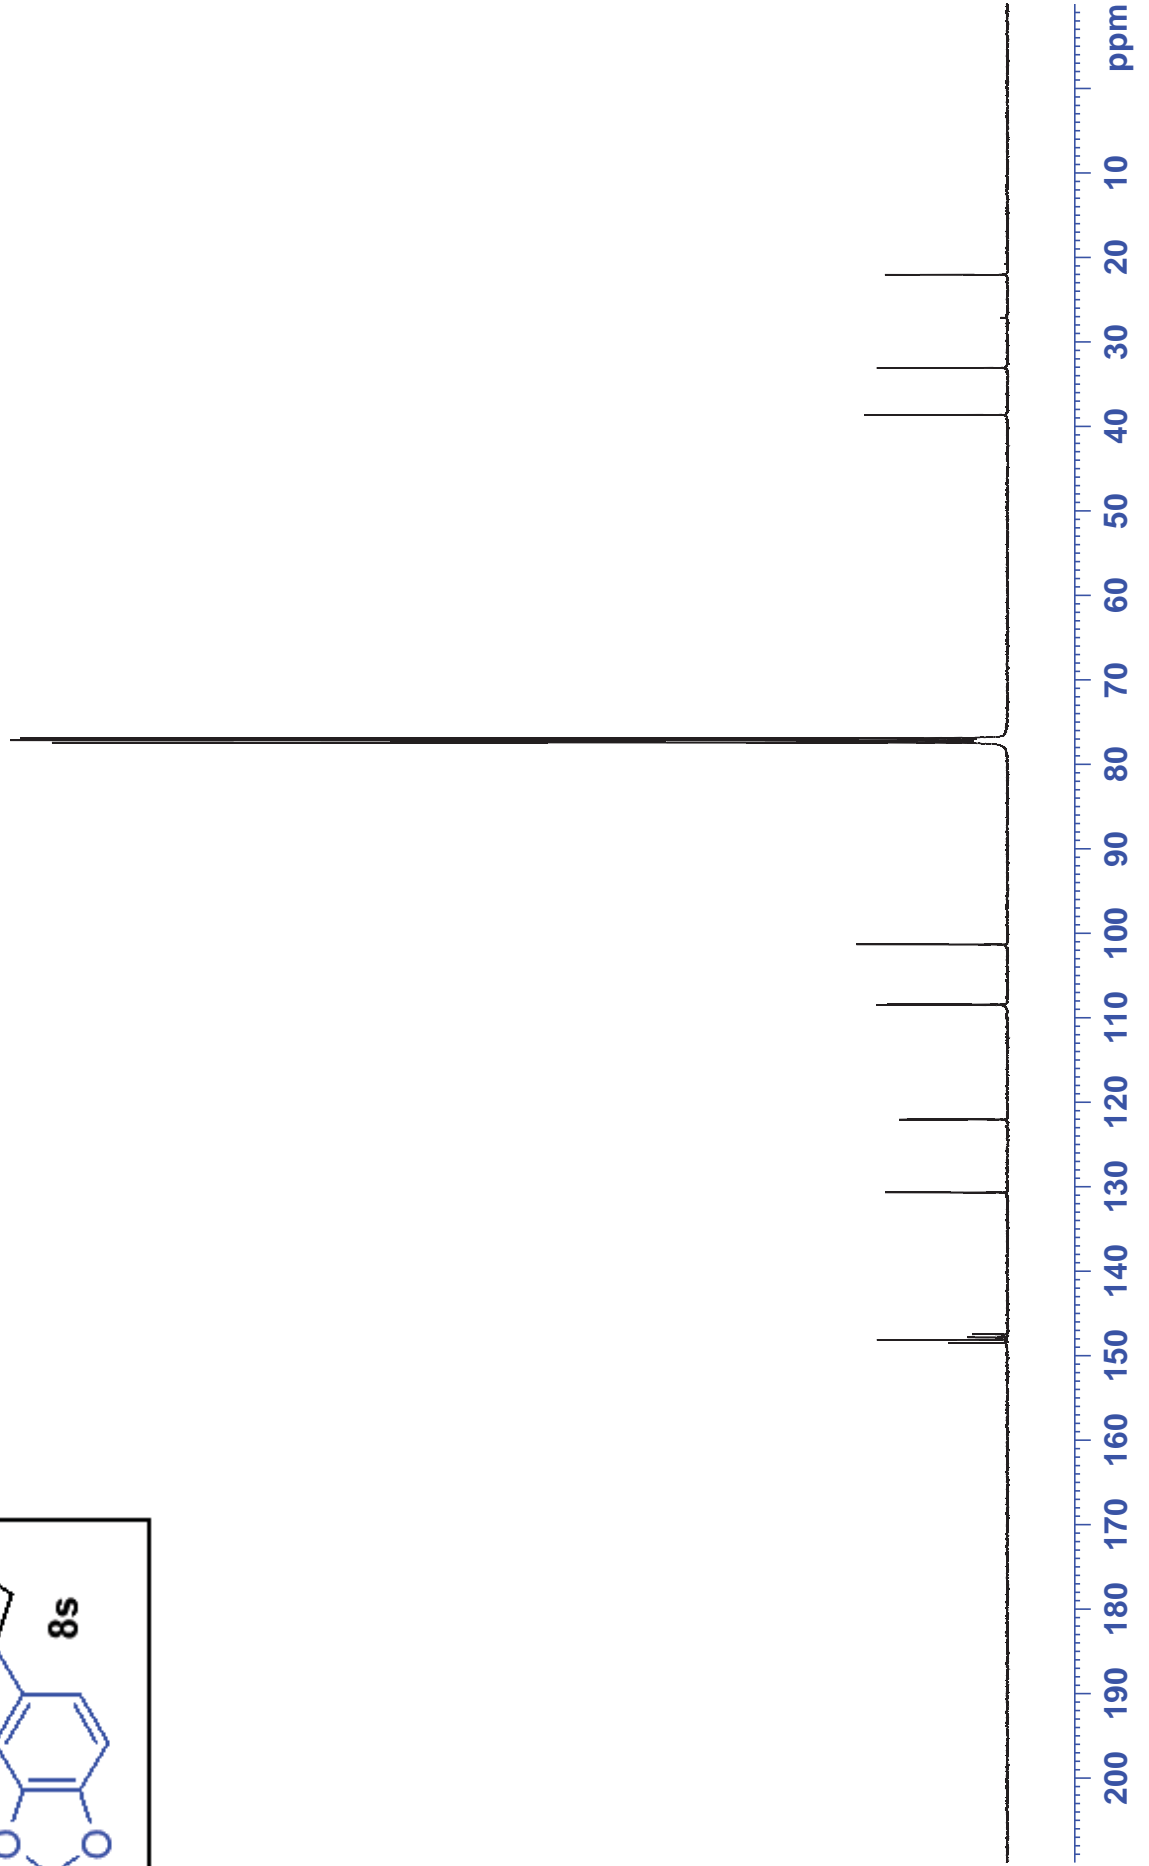



RPD-FGF23-A-49 (3)  
MD-3-A28

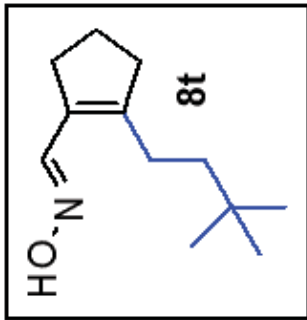

S125

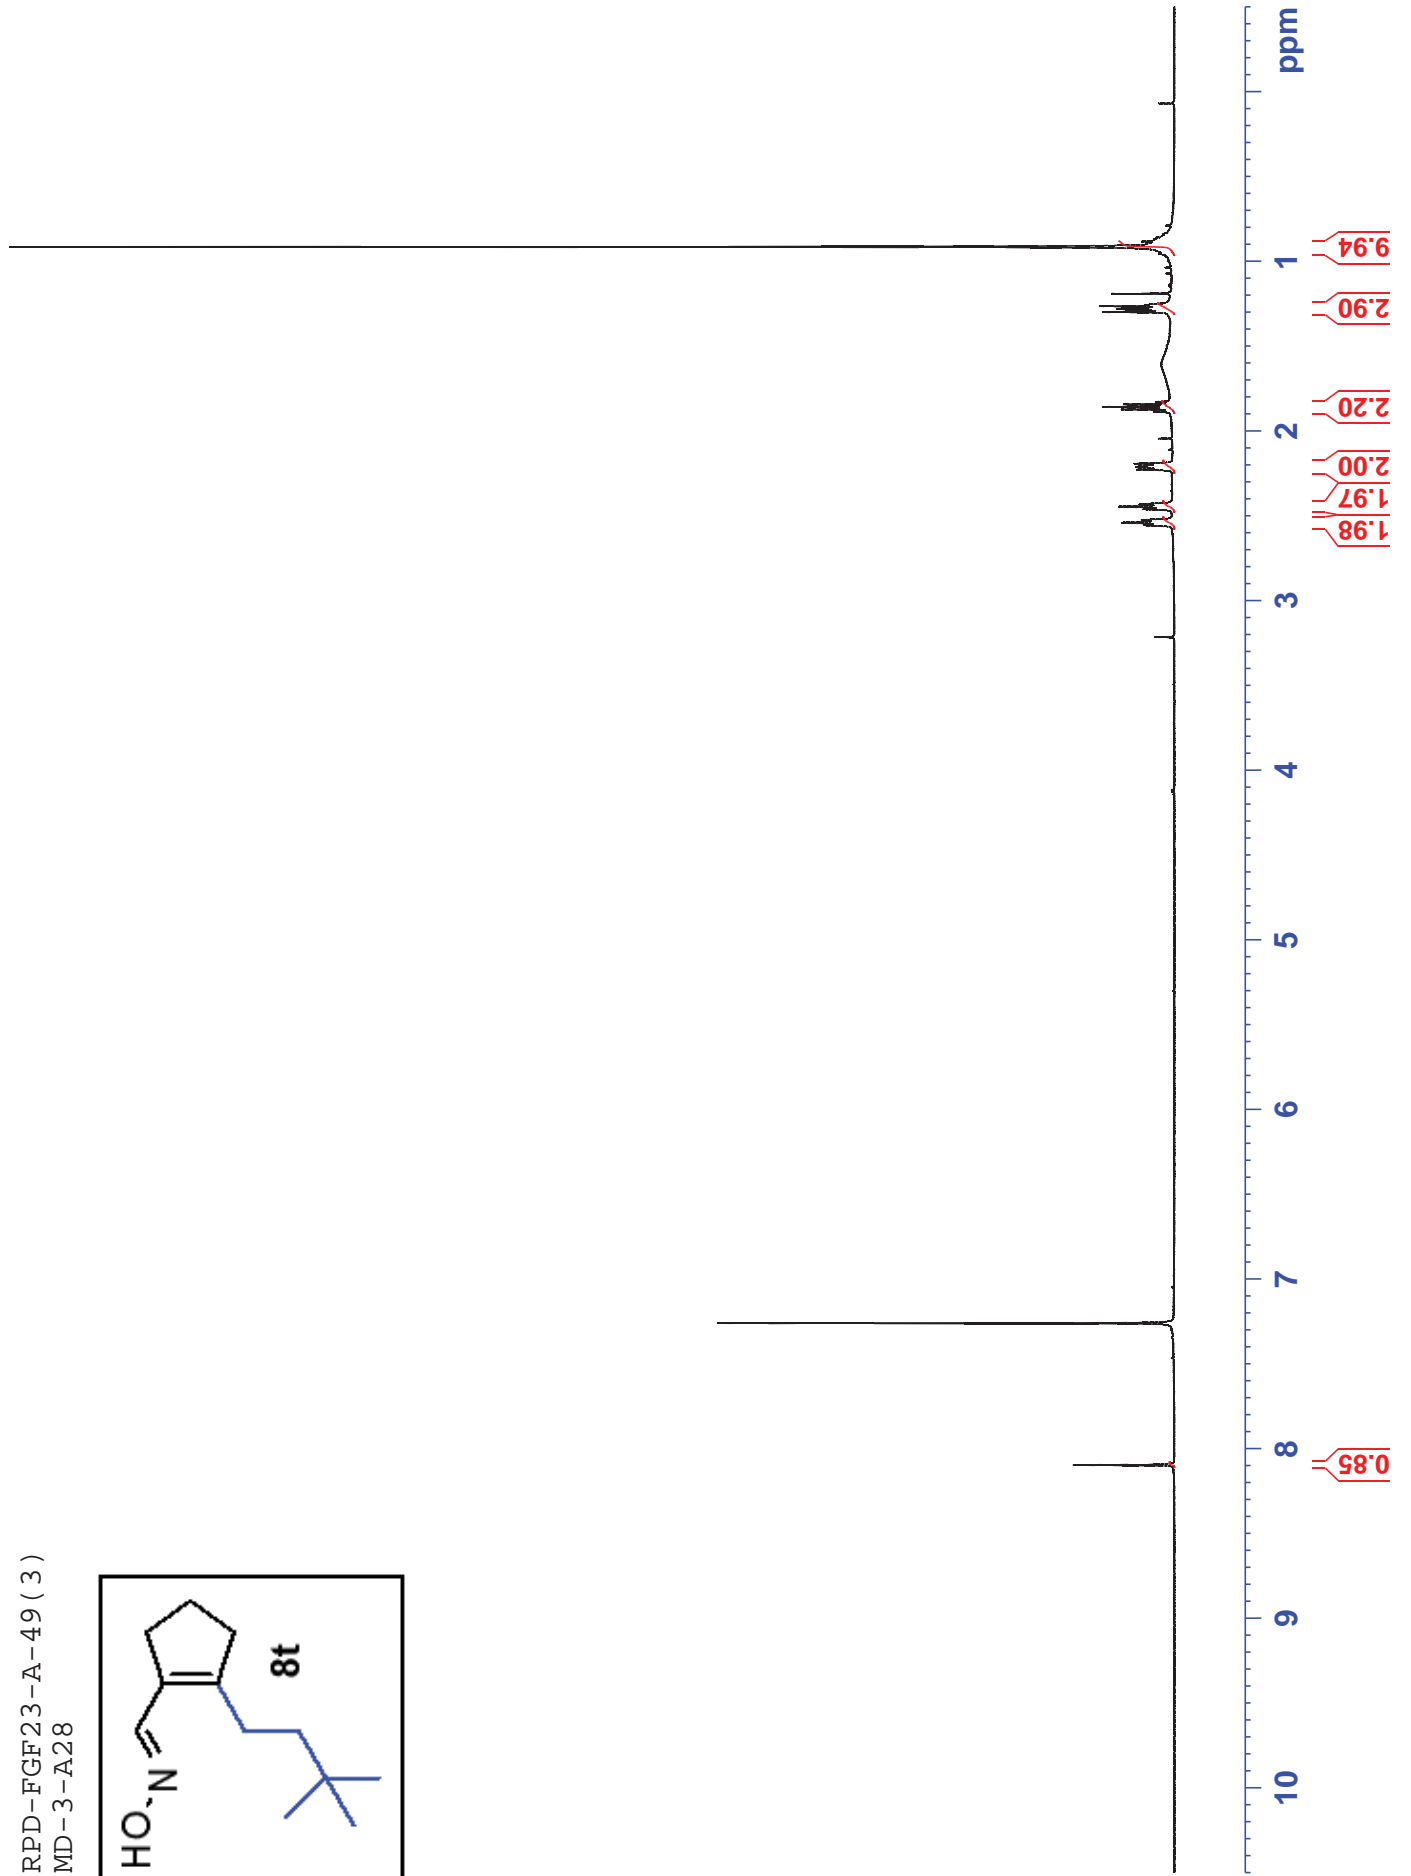

RPD-FGF23-A-49 (3)  
MD-3-A28

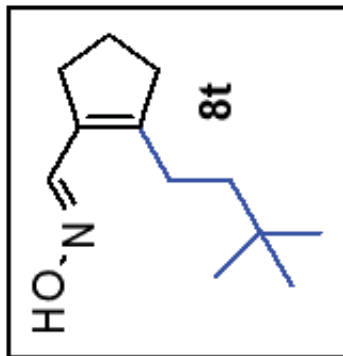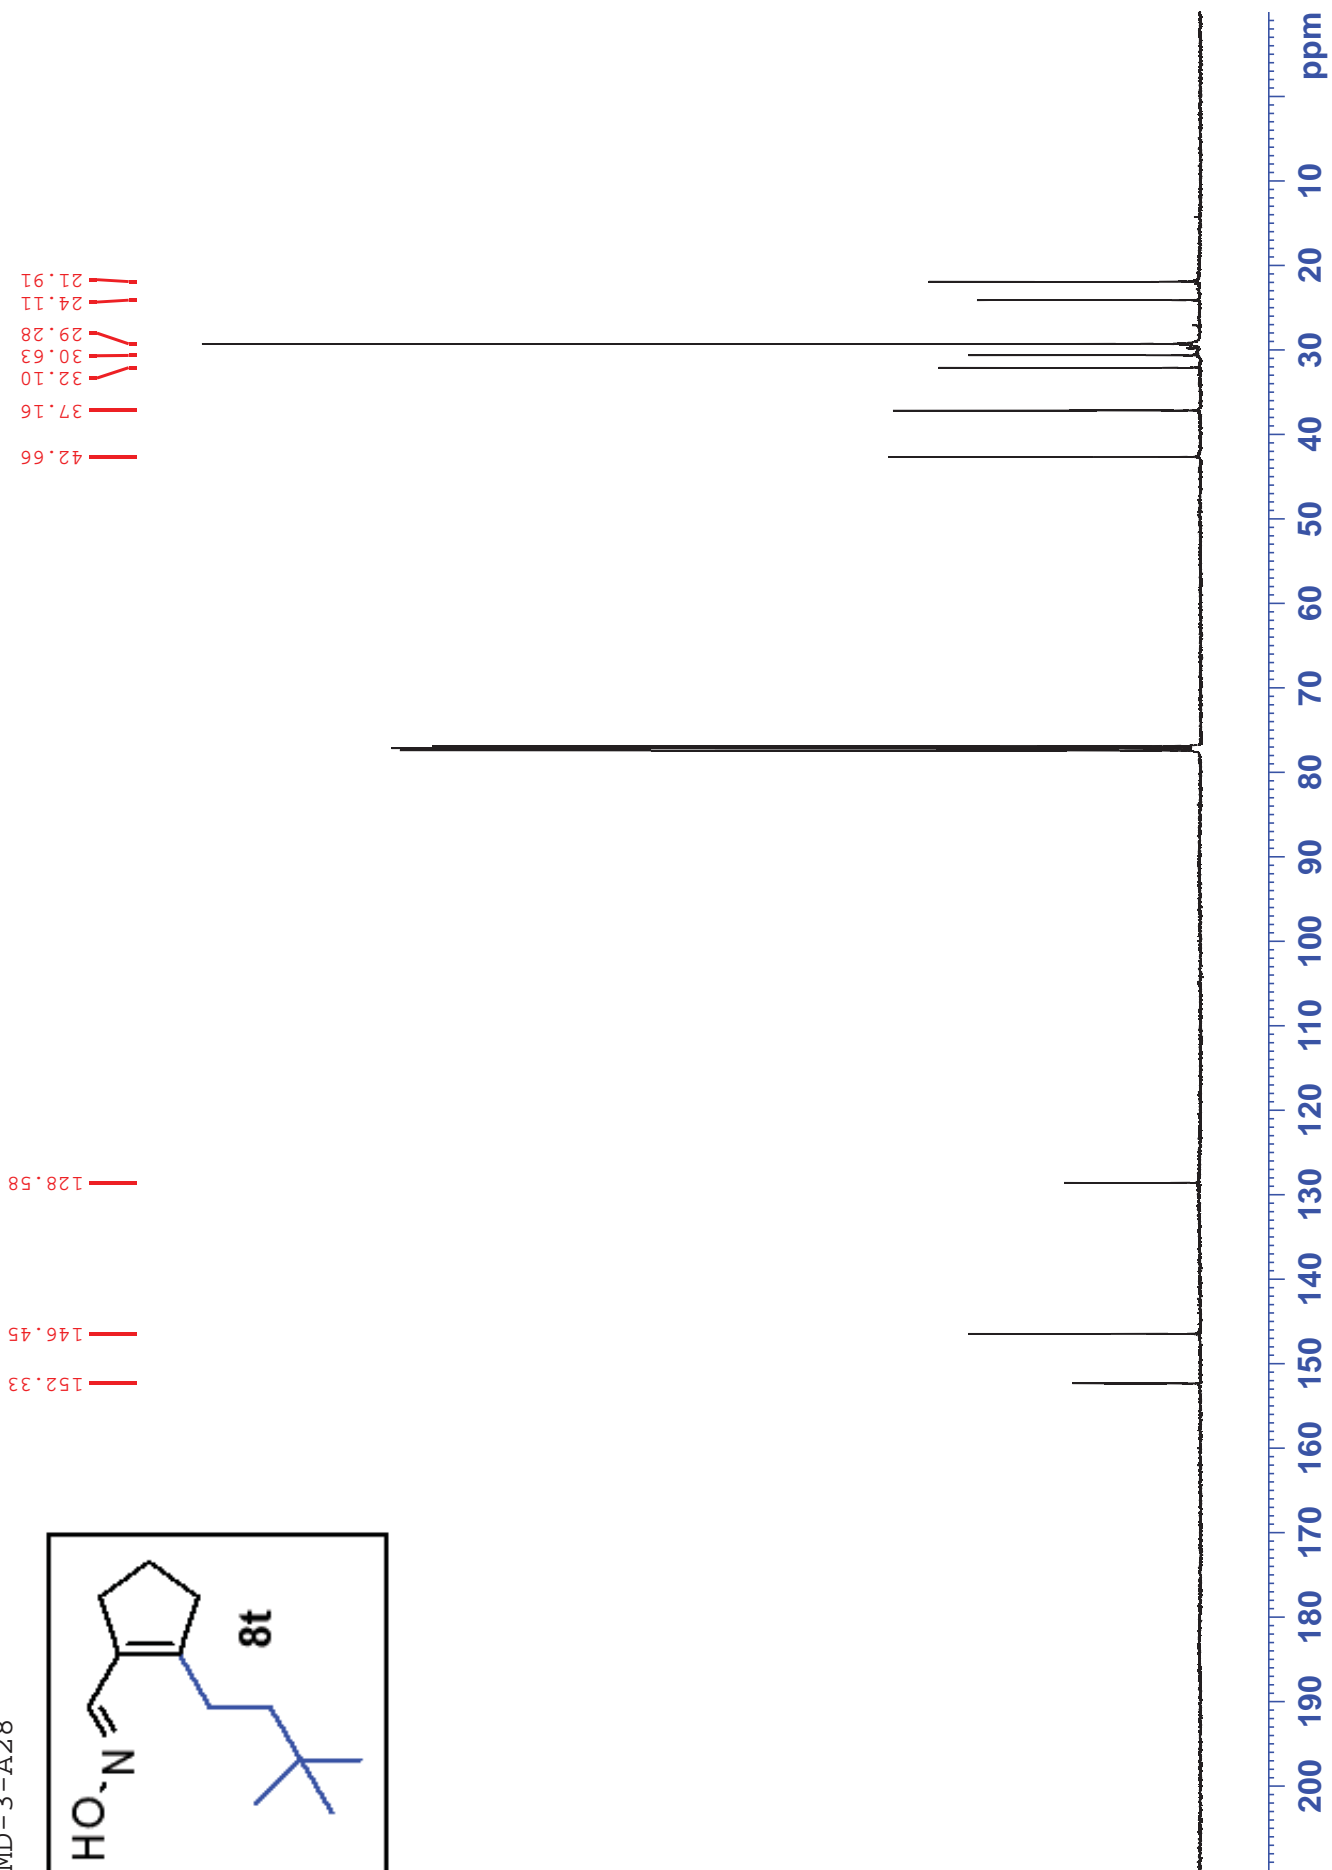

RPD-FGF23-A-37 (7)  
MD-3-A25

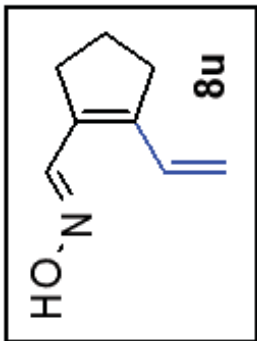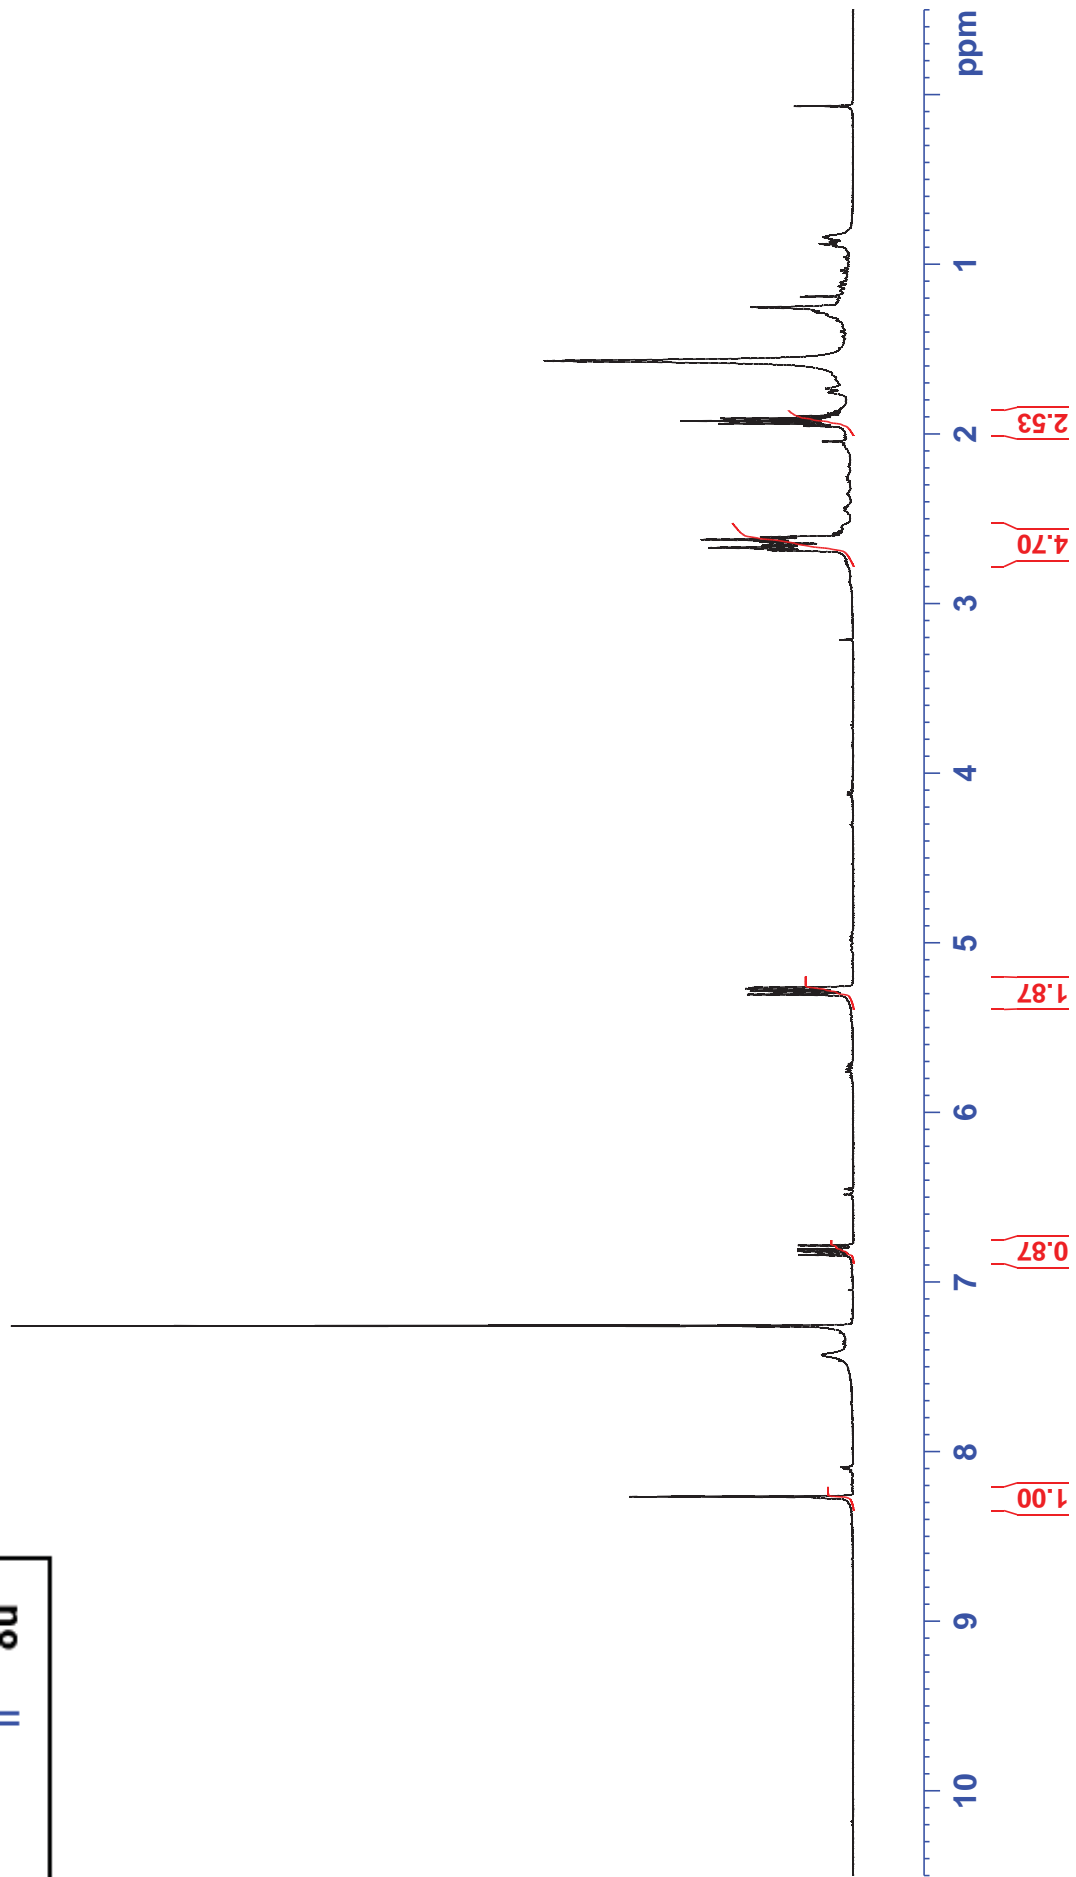

RPD-FGF23-A-37 (7)  
MD-3-A25

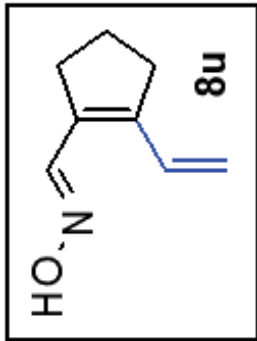

33.24  
32.79  
21.64

146.41  
145.65  
133.21  
129.48  
117.48

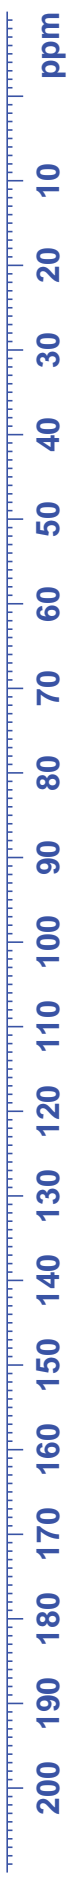

JWC-FGF23-A-53 (2)  
MD-3-A41

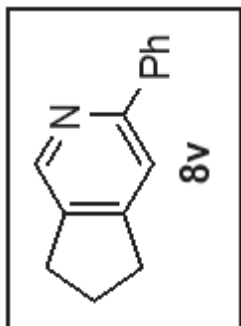

S129

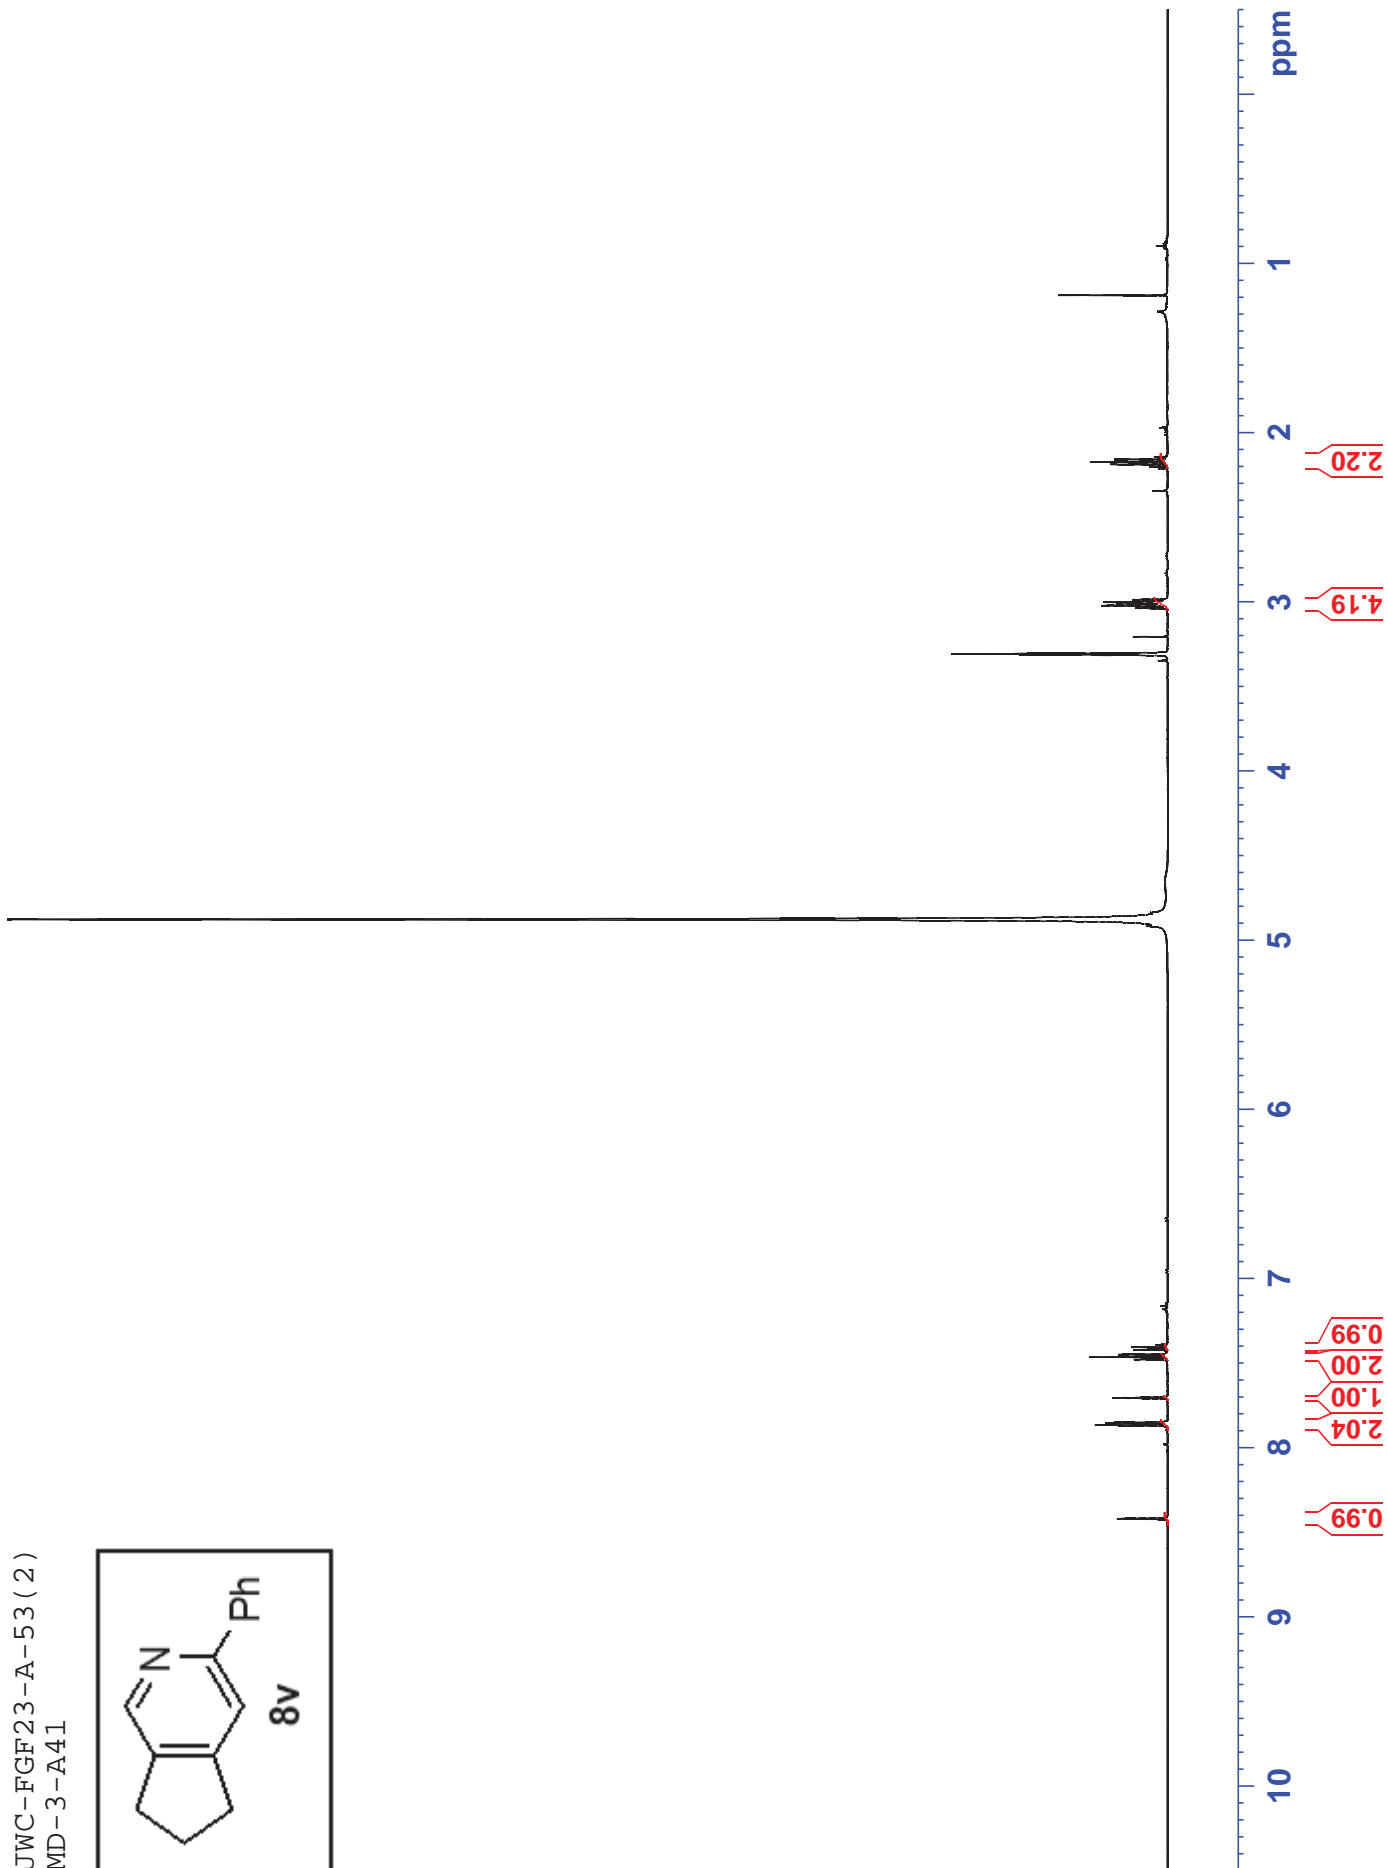

JWC-FGF23-A-53 (2)  
MD-3-A43

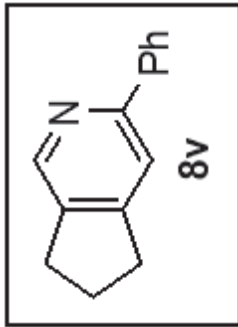

33.67  
30.84  
26.18

157.47  
156.99  
145.53  
140.82  
140.72  
129.78  
129.75  
128.17  
118.89

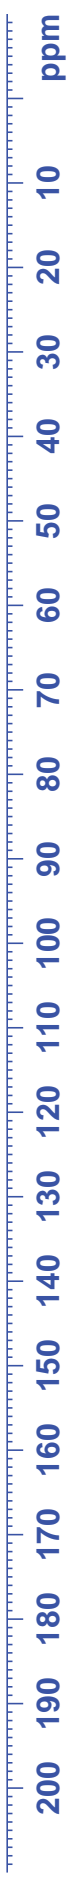

RPD-FGF23-A-91 (4)  
MD-3-A33

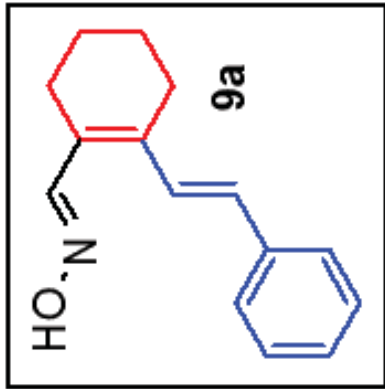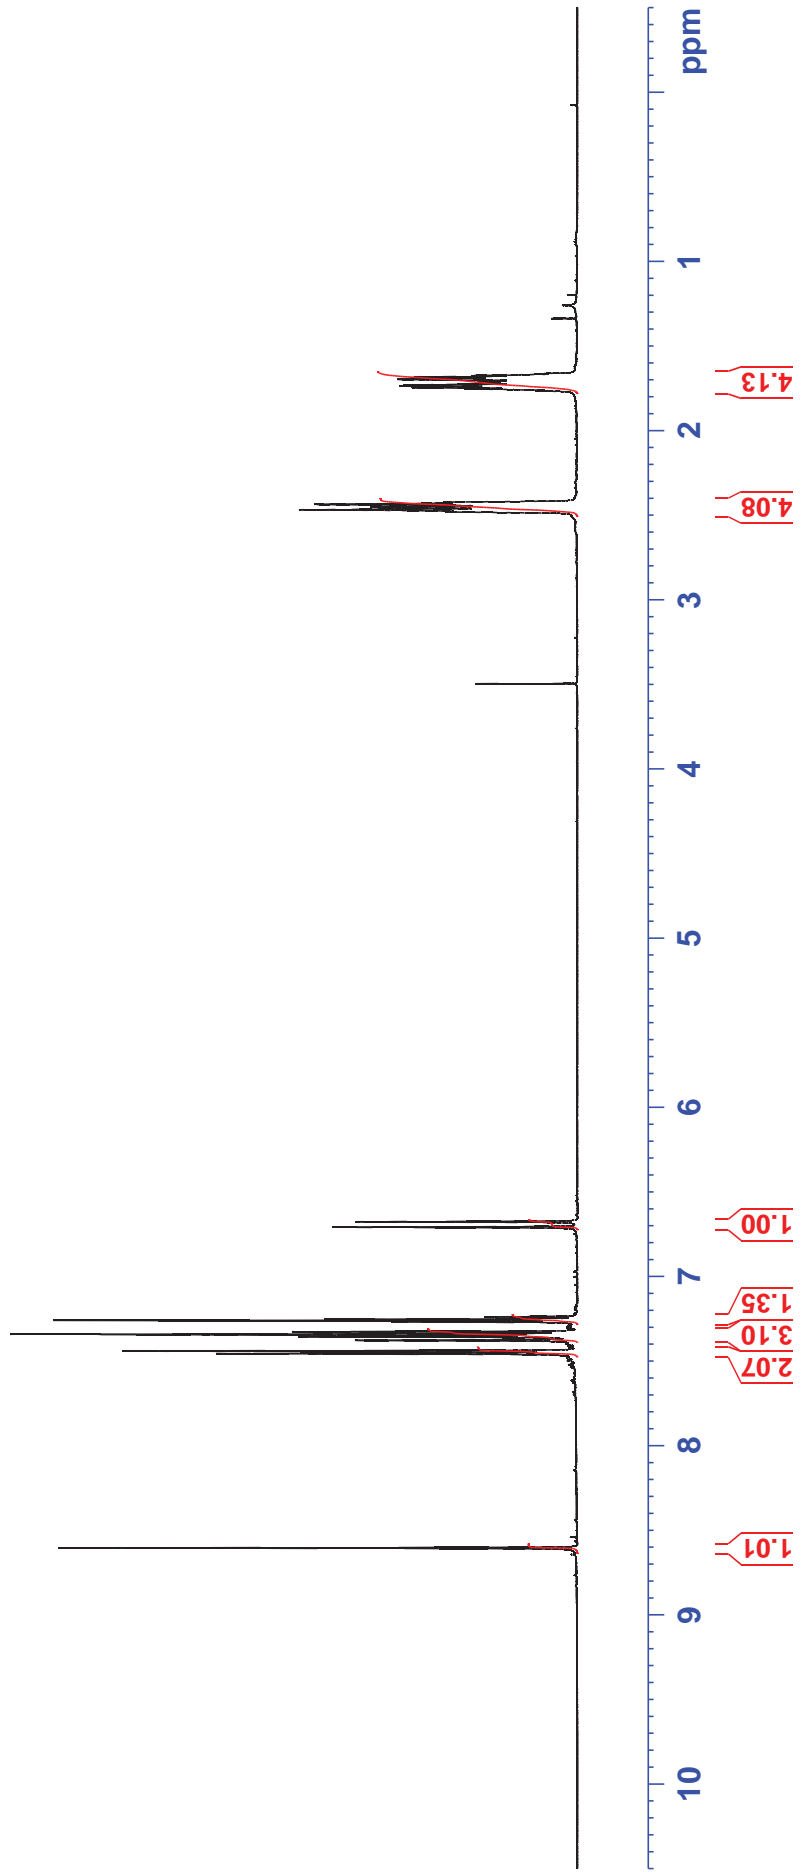

S131

RPD-FGF23-A-91 (4)  
MD-3-A33

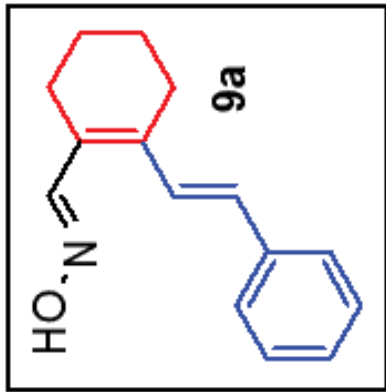

26.87  
25.47  
22.38  
22.05

139.09  
137.52  
129.64  
129.31  
128.83  
127.94  
126.72  
124.98

149.12

200 190 180 170 160 150 140 130 120 110 100 90 80 70 60 50 40 30 20 10 ppm



RPD-FGF23-A-93 (4)  
MD-3-A34

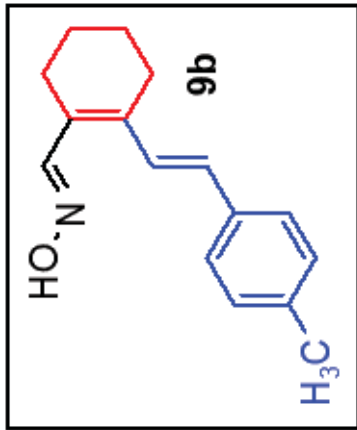

S133

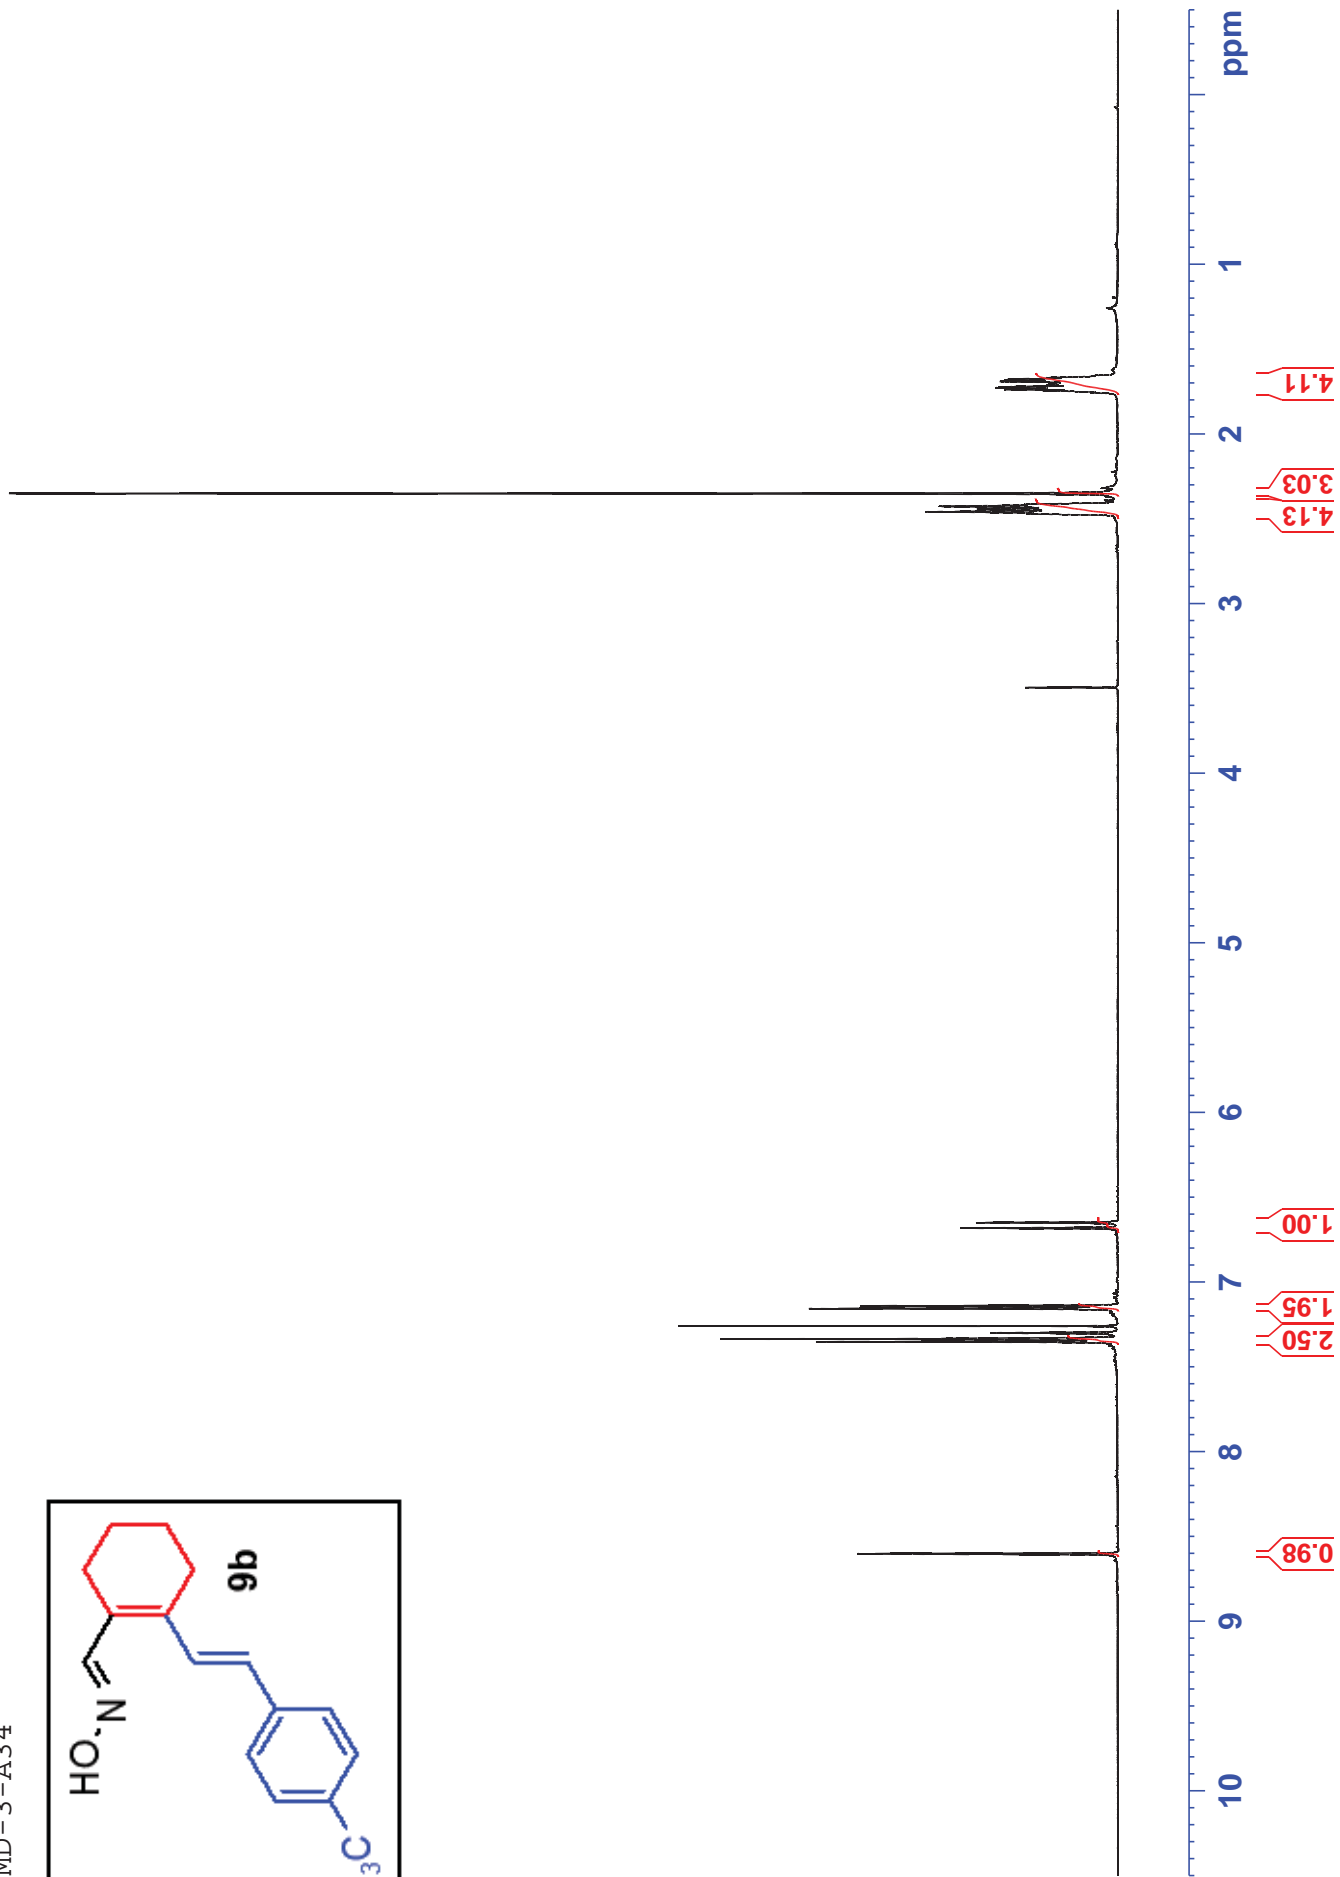

RPD-FGF23-A-93 (4)  
MD-3-A34

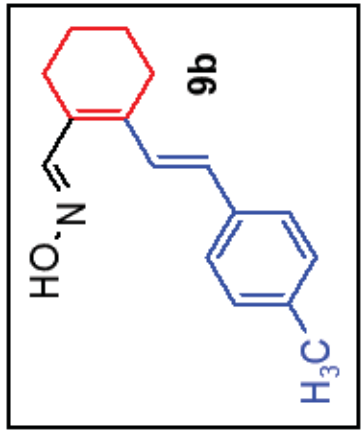

26.89  
25.47  
22.43  
22.10  
21.40

149.25  
139.33  
137.95  
134.74  
129.63  
129.58  
128.80  
126.67  
124.03

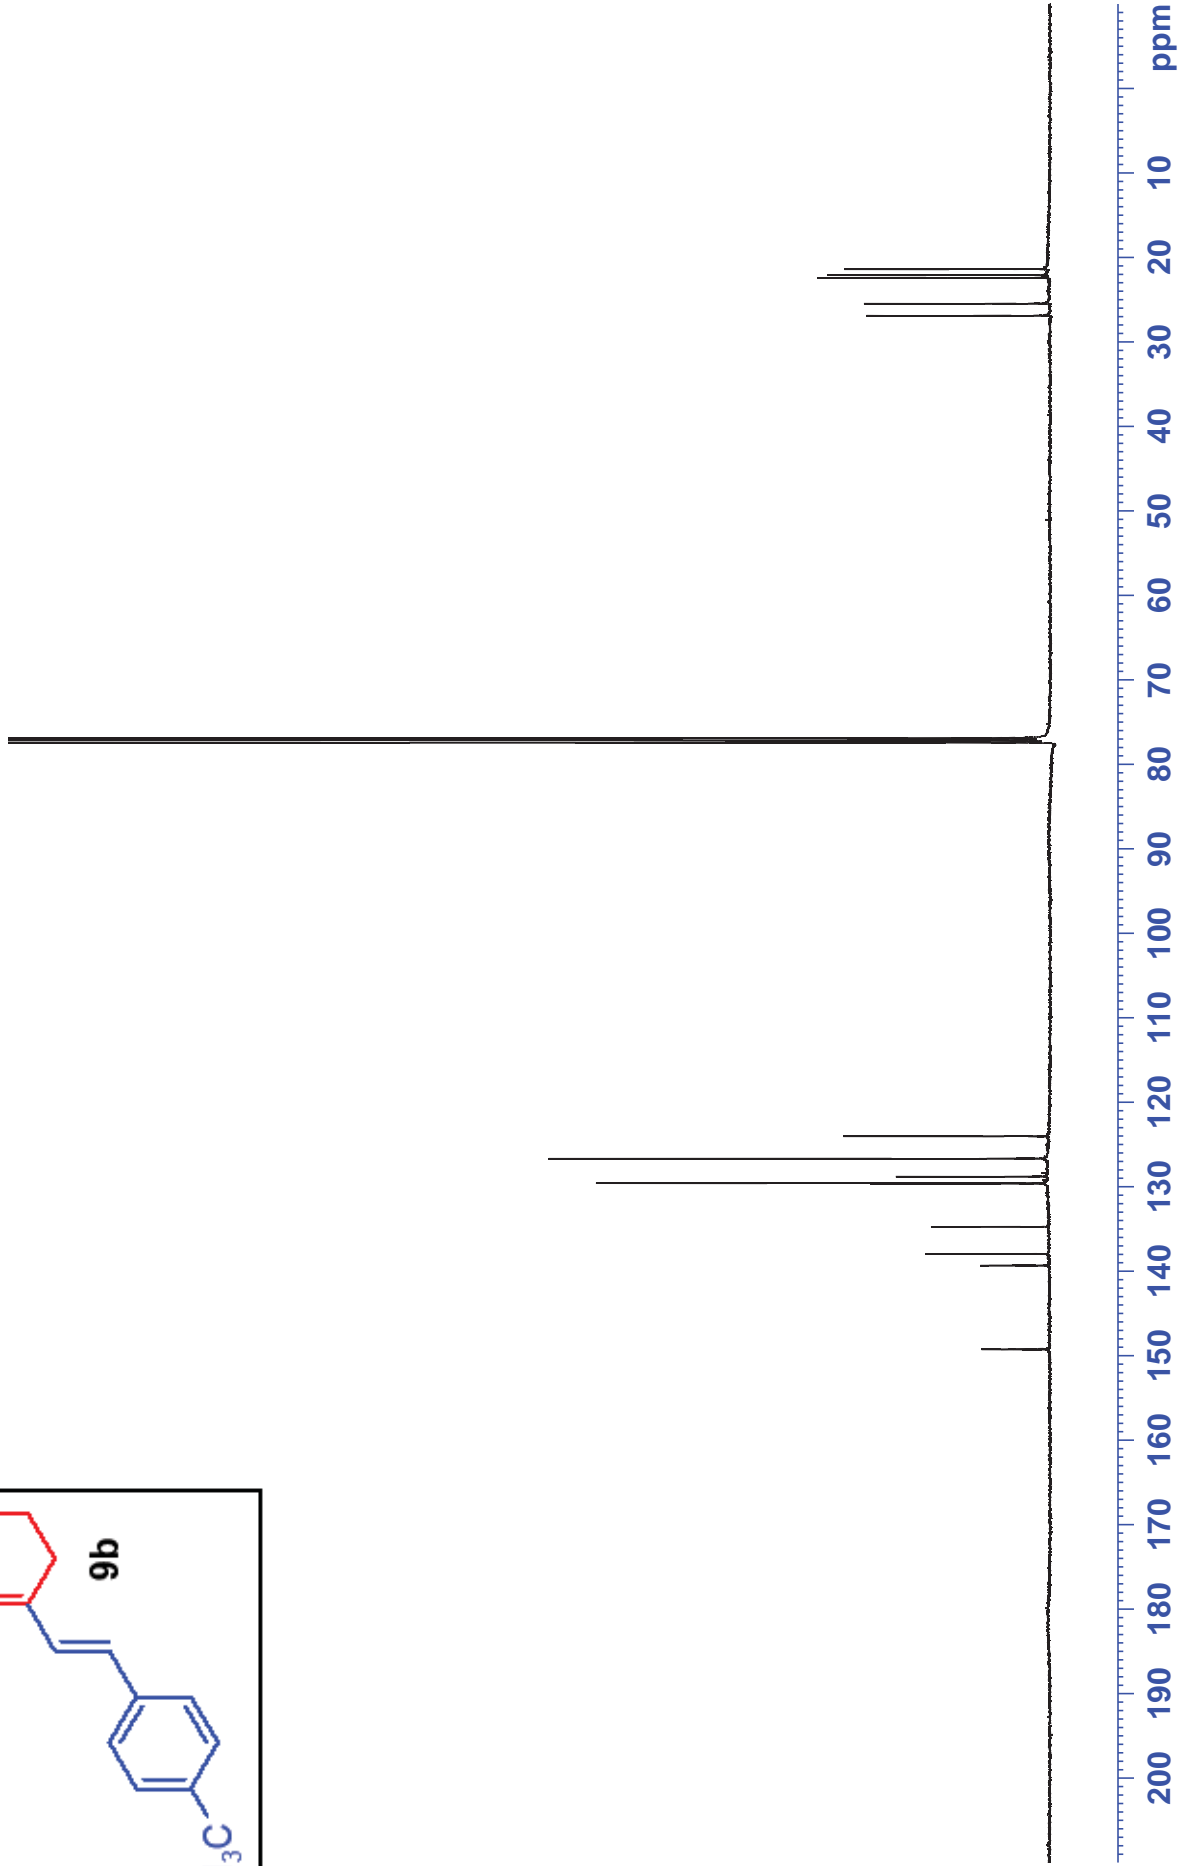

MOI-FGF23-A-17 (11)  
MD-3-A45

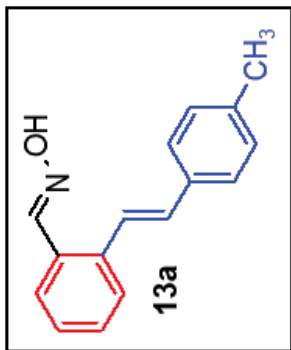

S135

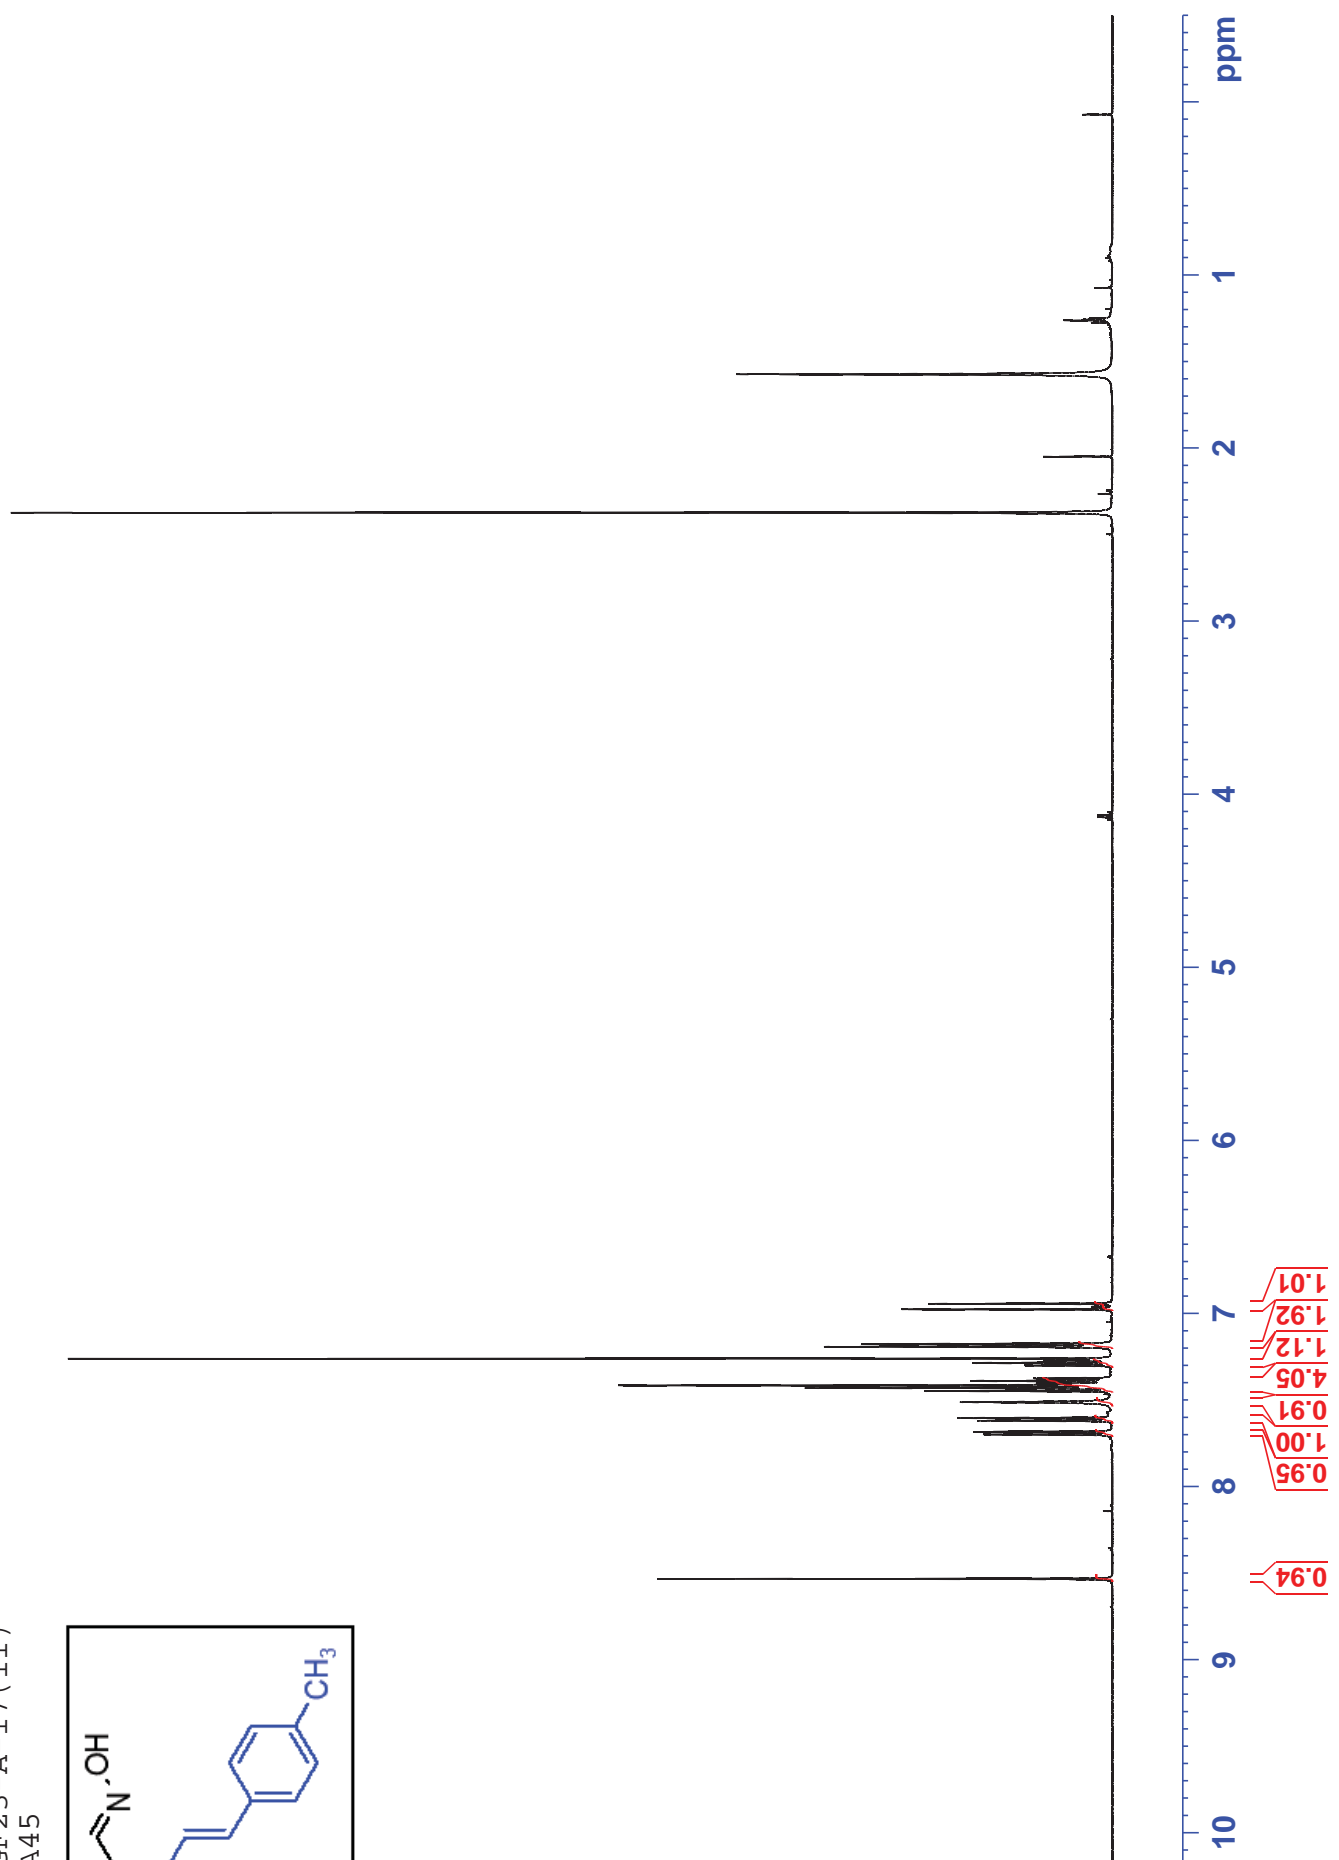

MOI-FGF23-A-17(11)  
MD-3-A45

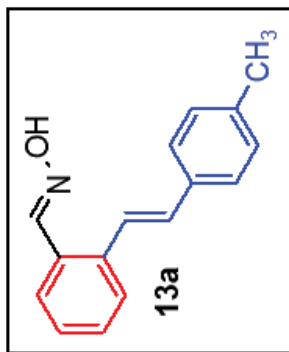

S136

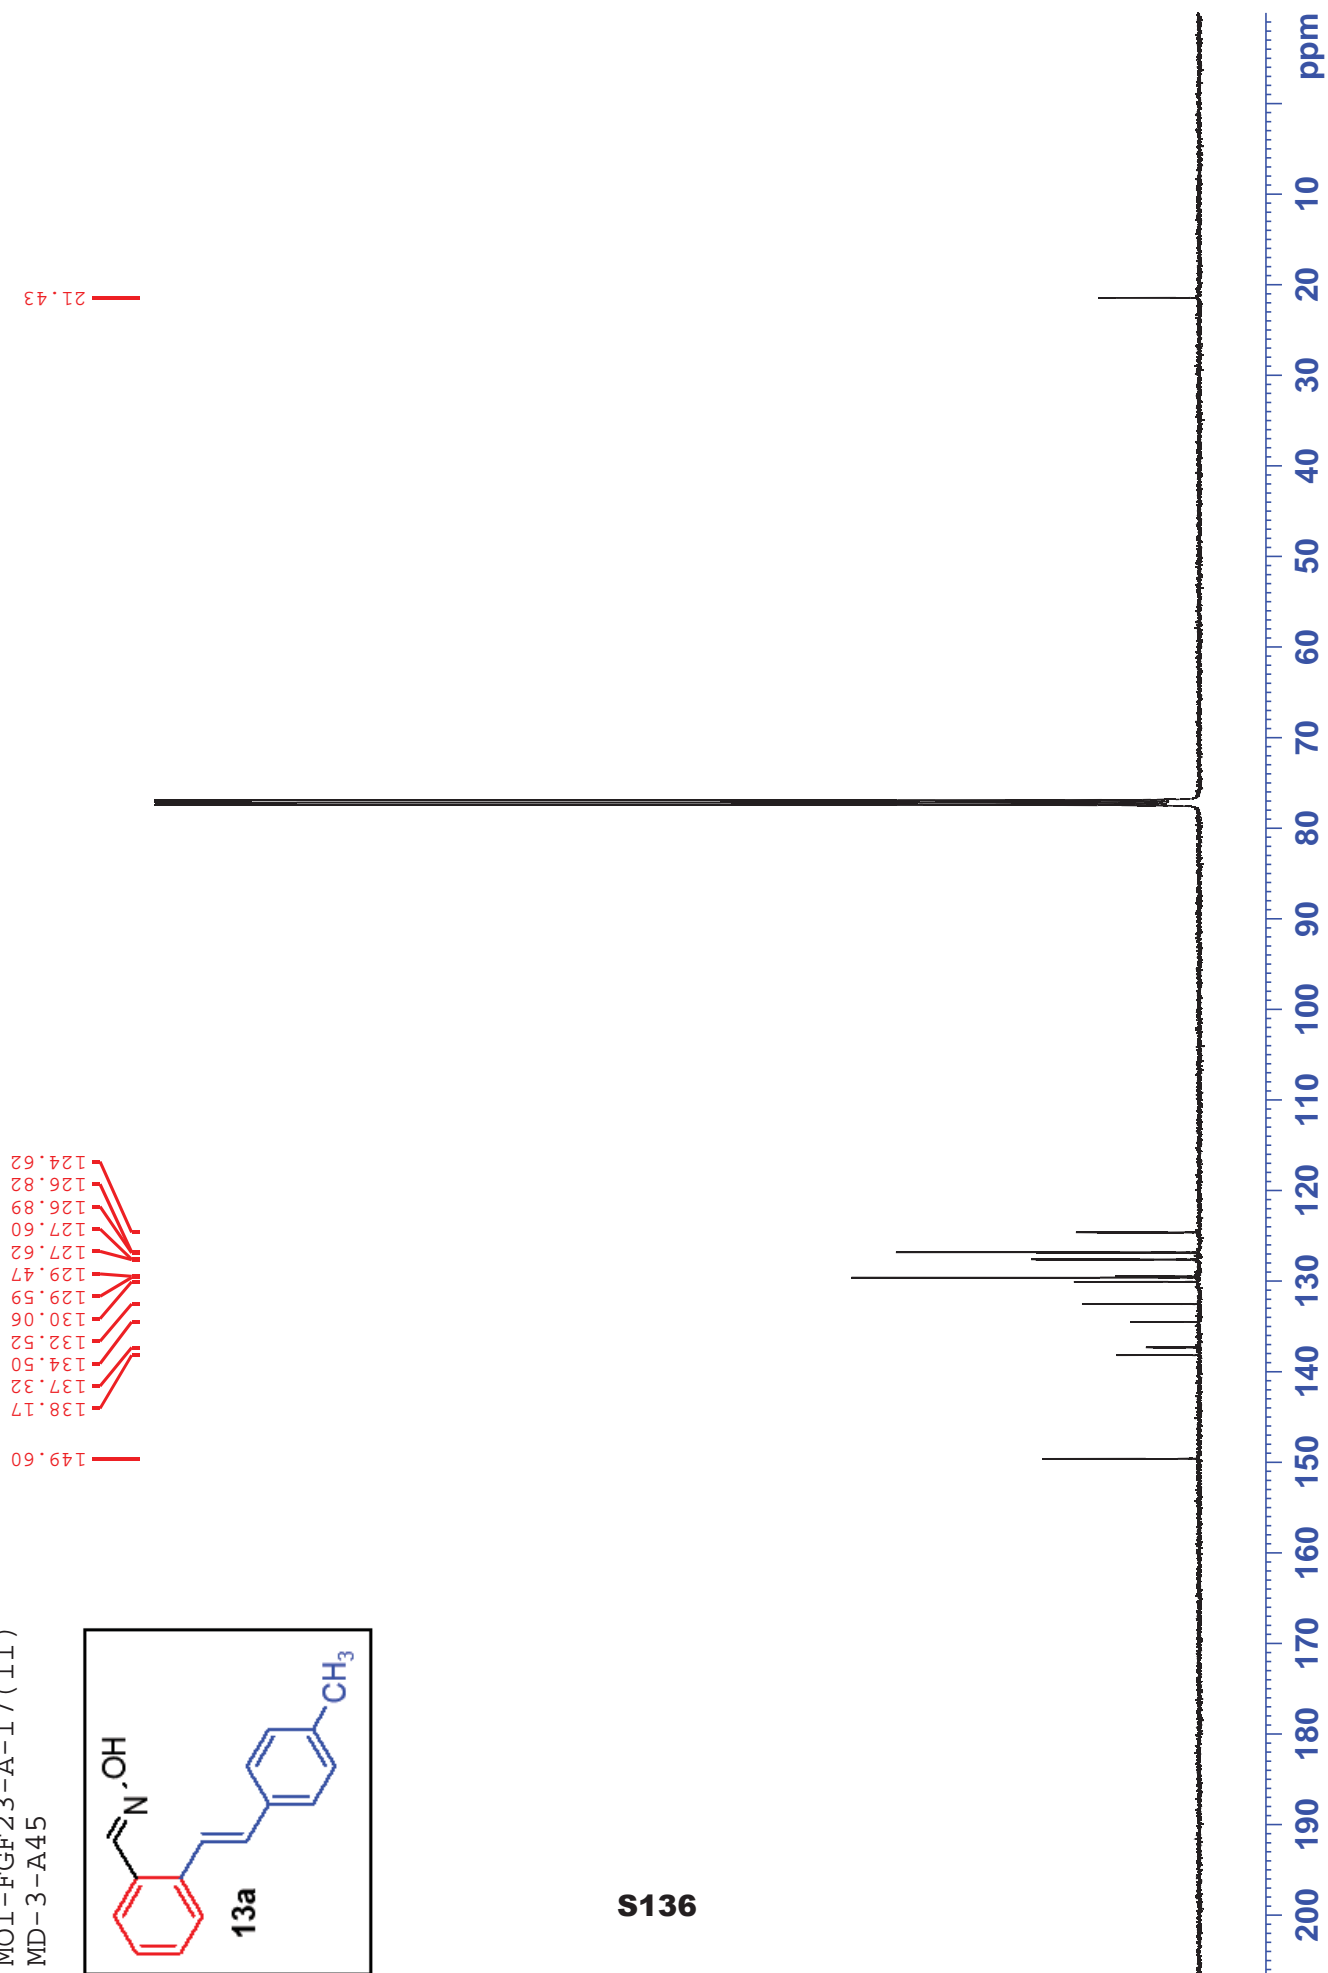

MOI-FGF23-A-21 (5)  
MD-3-A46

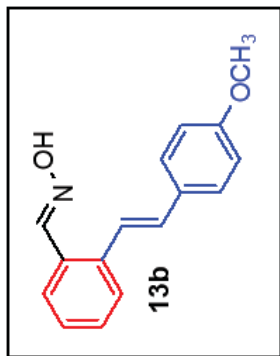

S137

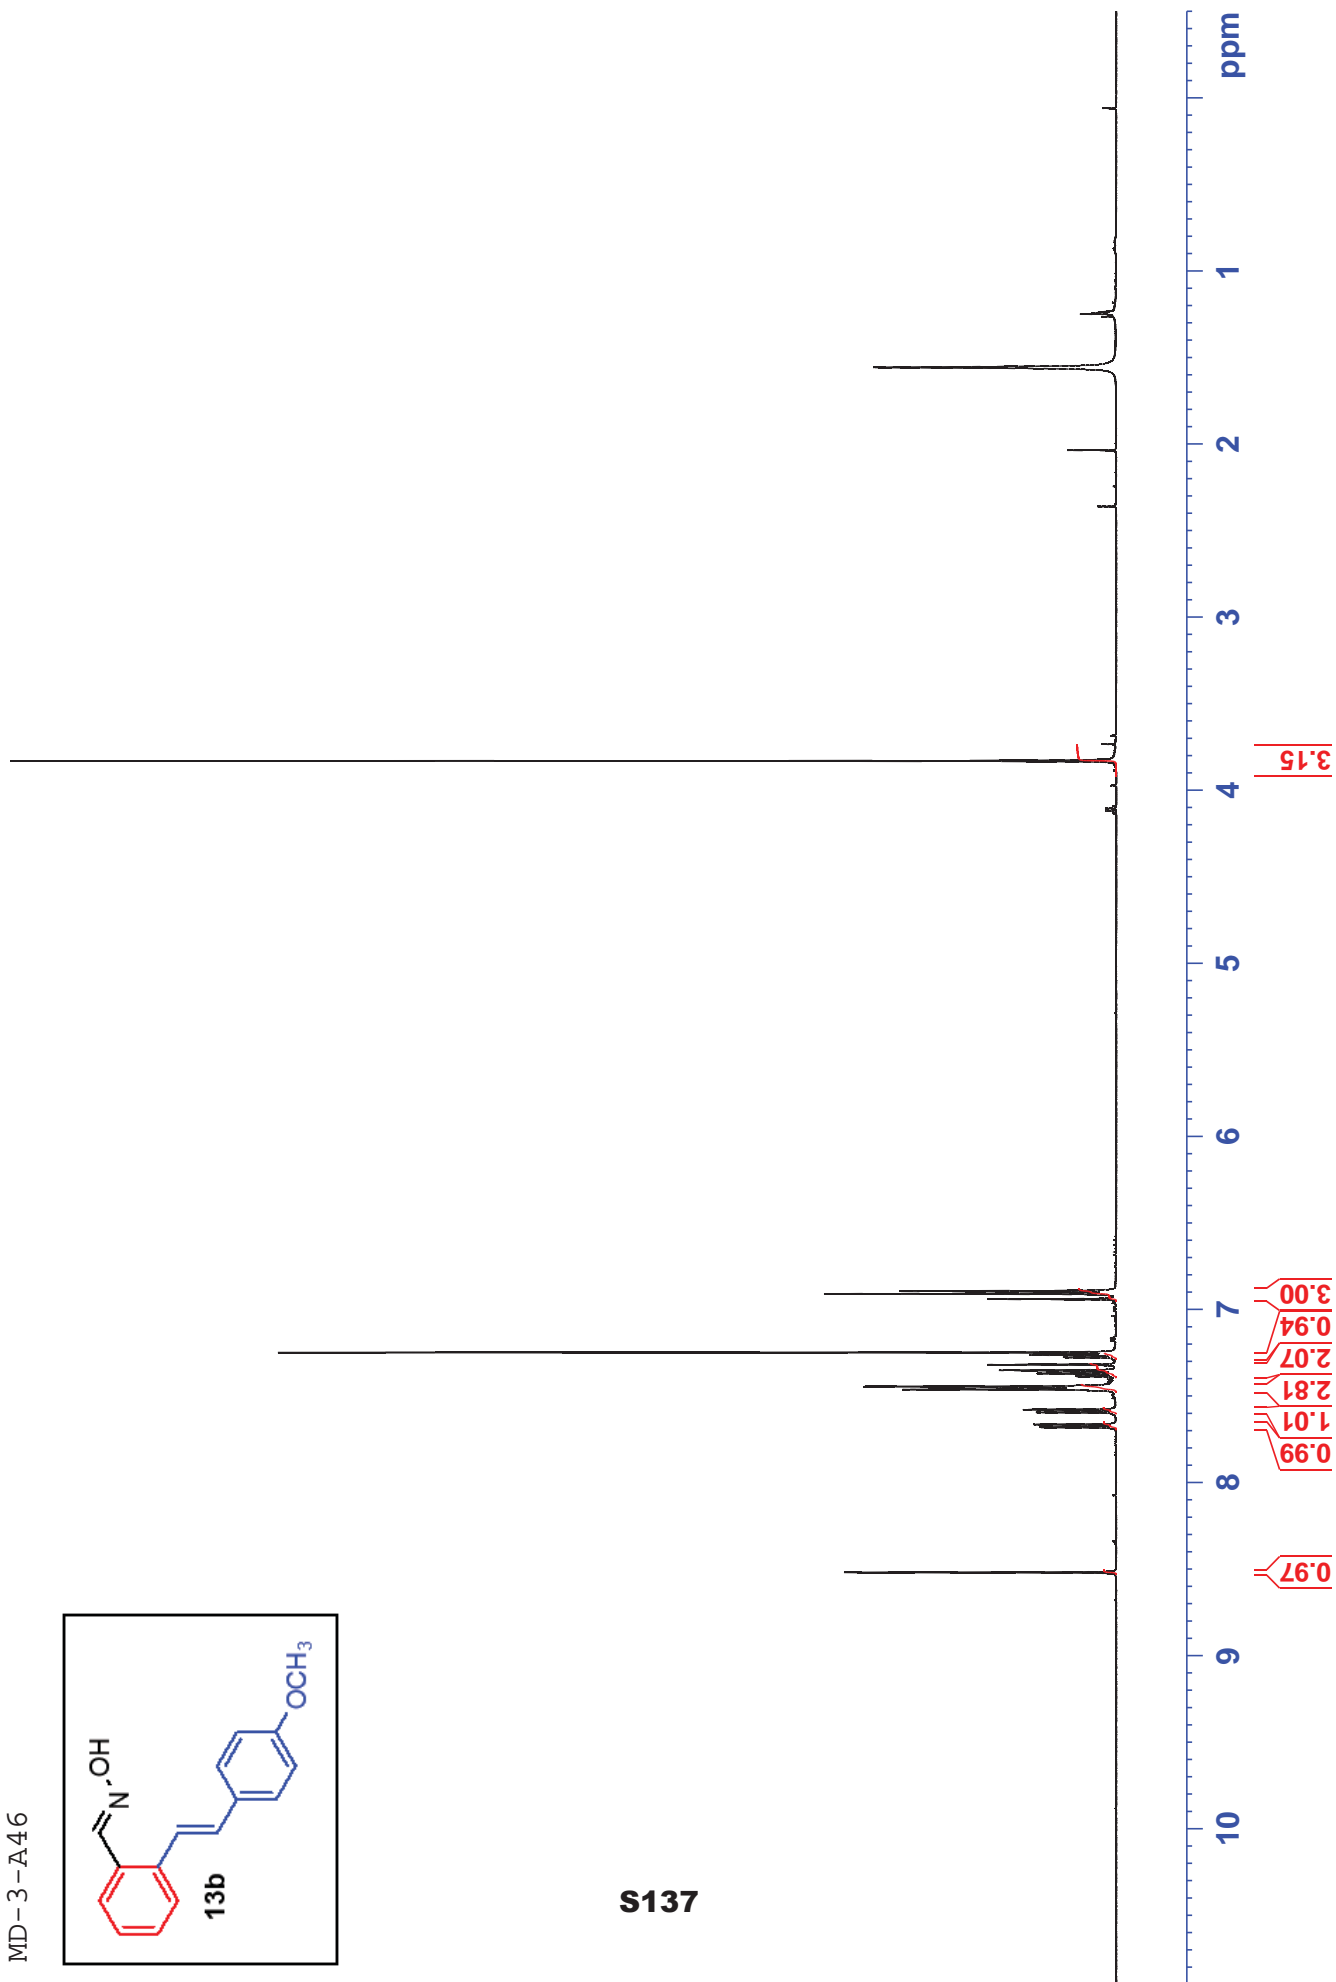

MOI-FGF23-A-21 (5)  
MD-3-A46

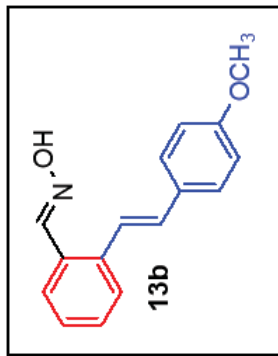

S138

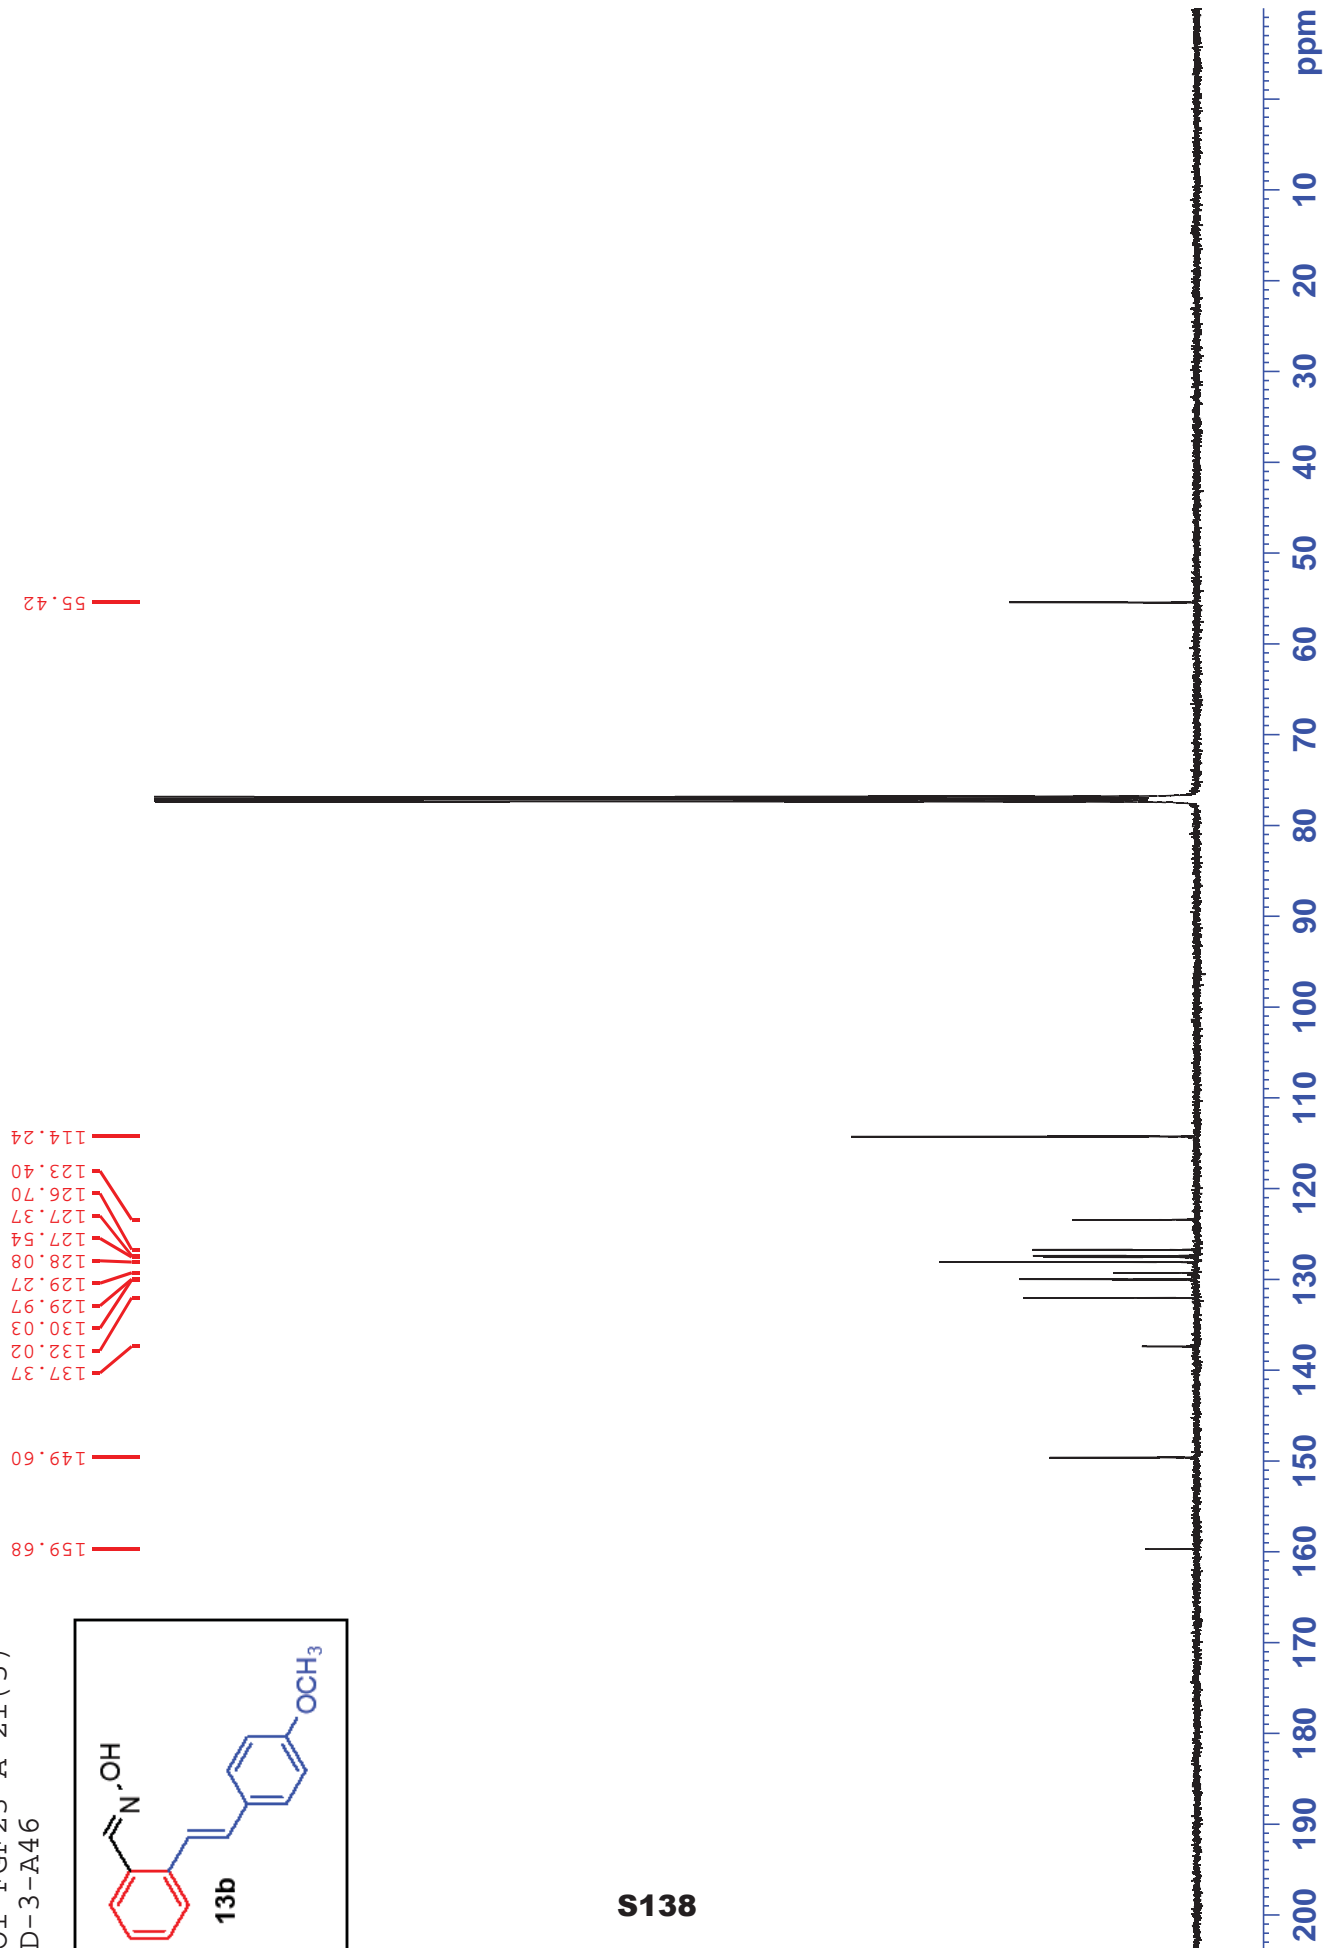

MOI-FGF23-A-71 (5)  
MD-3-A52

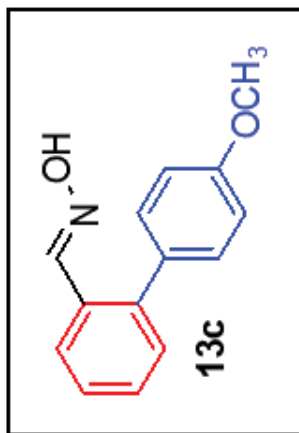

S139

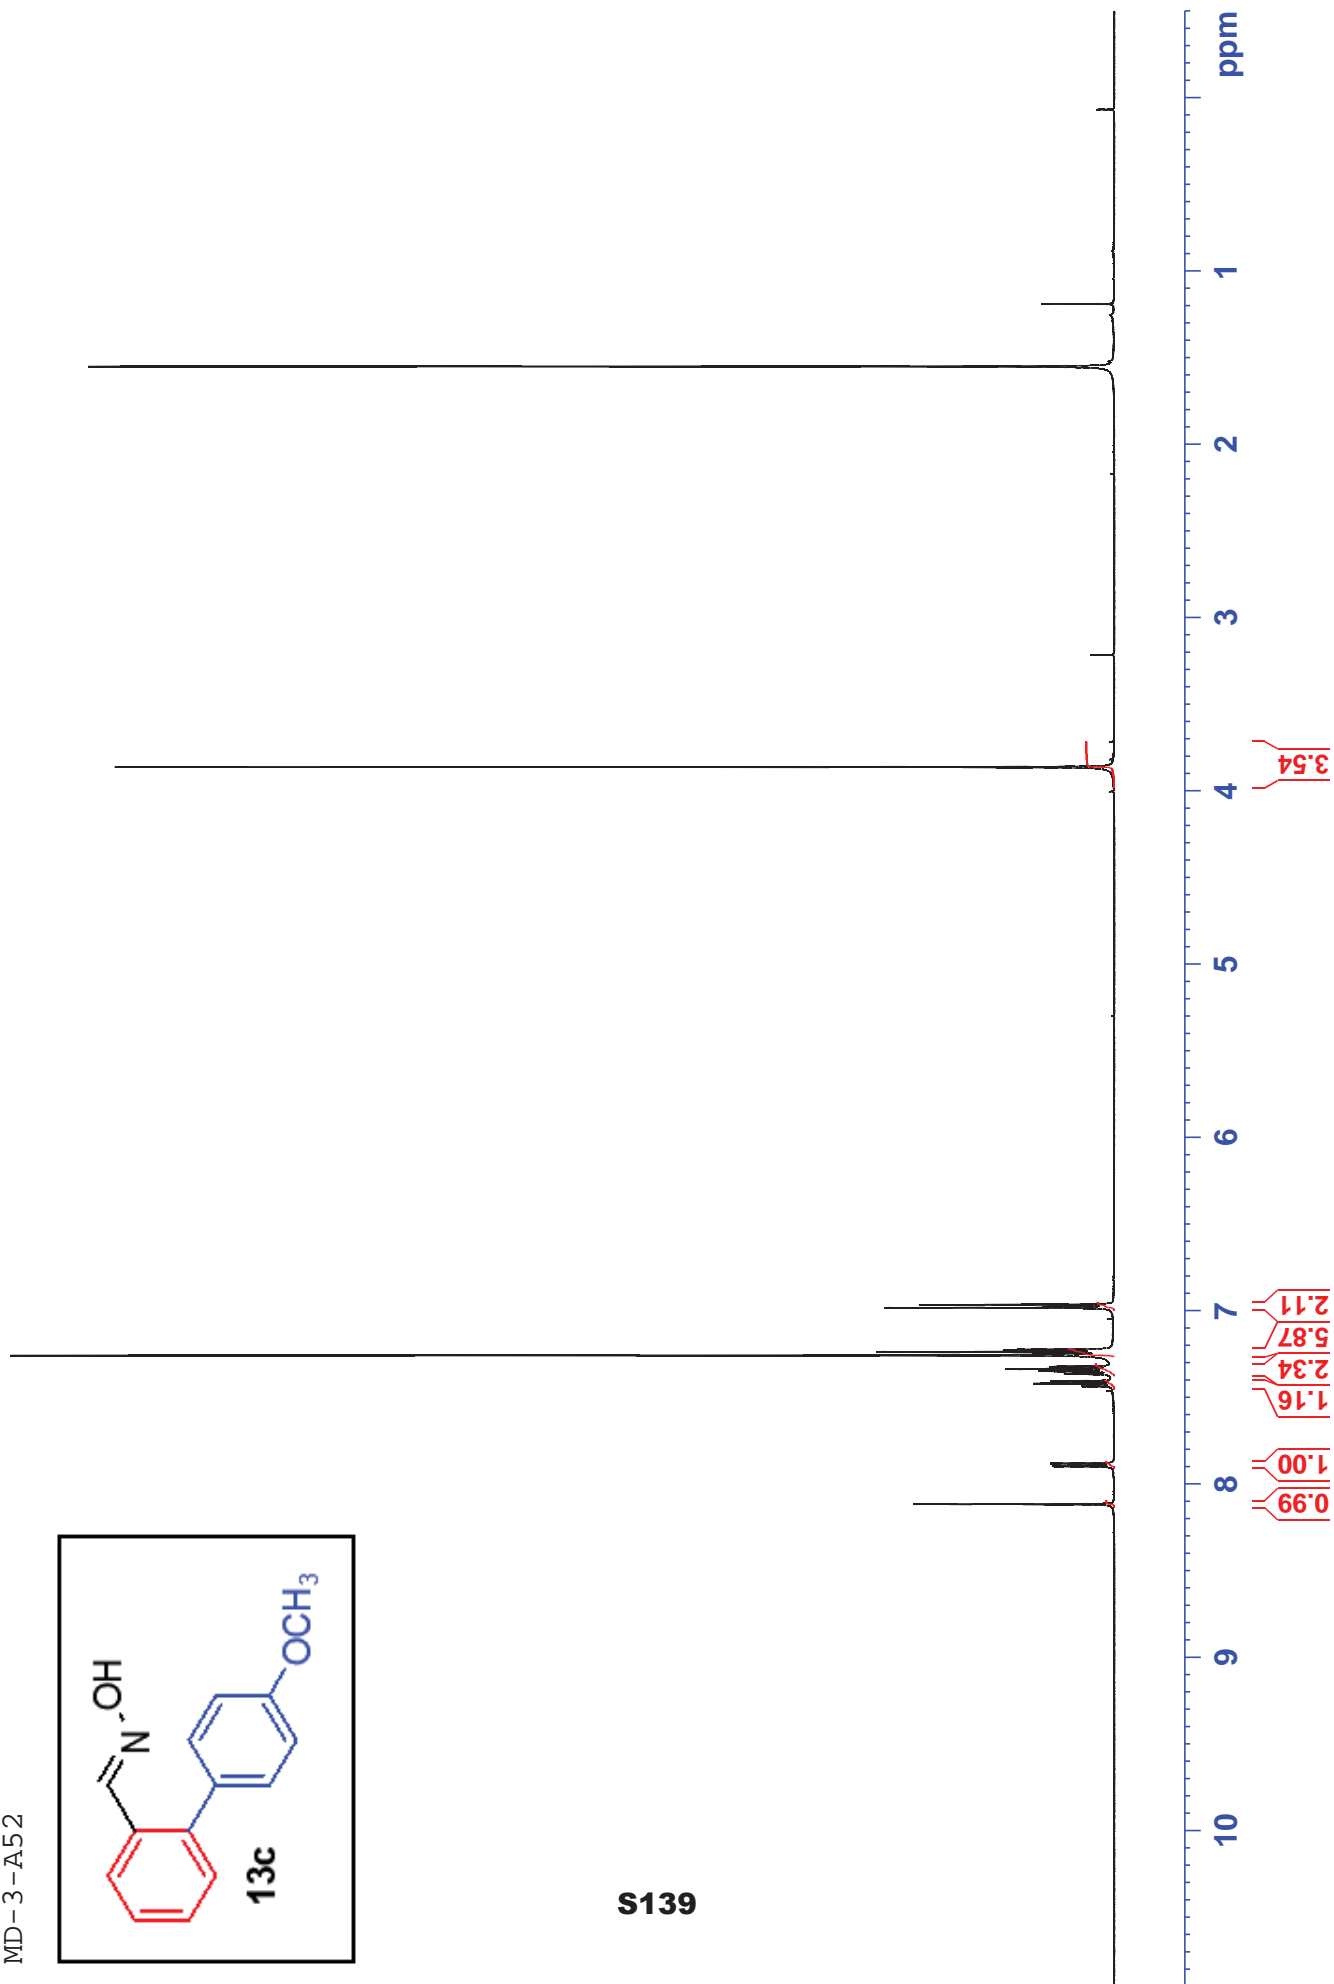

MOI-FGF23-A-71 (5)  
MD-3-A52

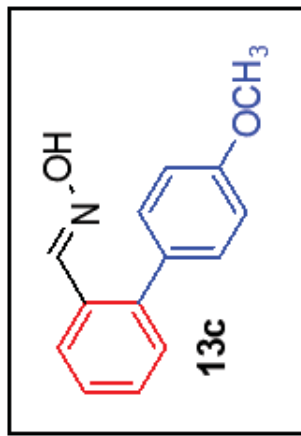

159.33  
150.15  
142.05  
131.96  
130.99  
130.45  
129.84  
129.75  
127.42  
126.25  
113.98  
55.51

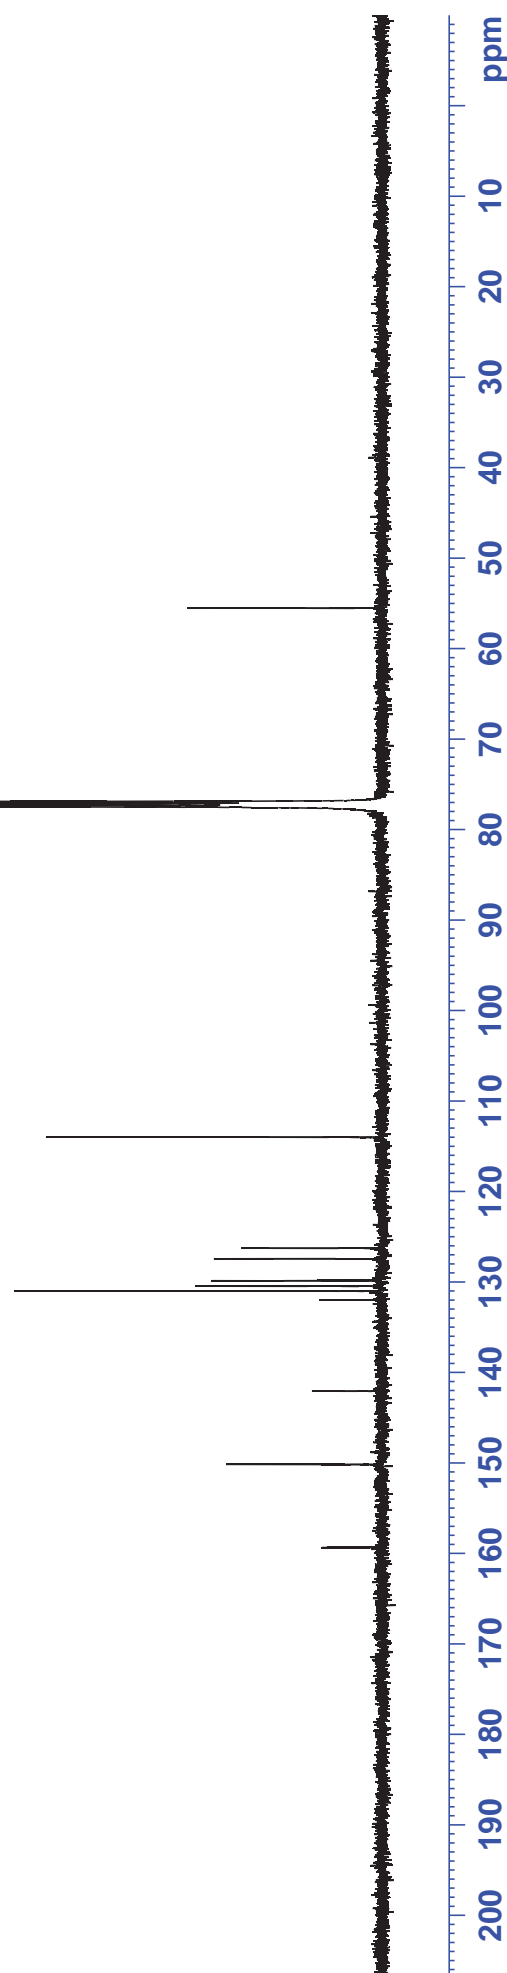

S140



MOI-FGF23-A-69 (4)  
MD-3-A53

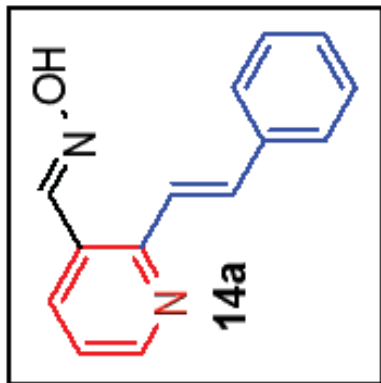

14a

S141

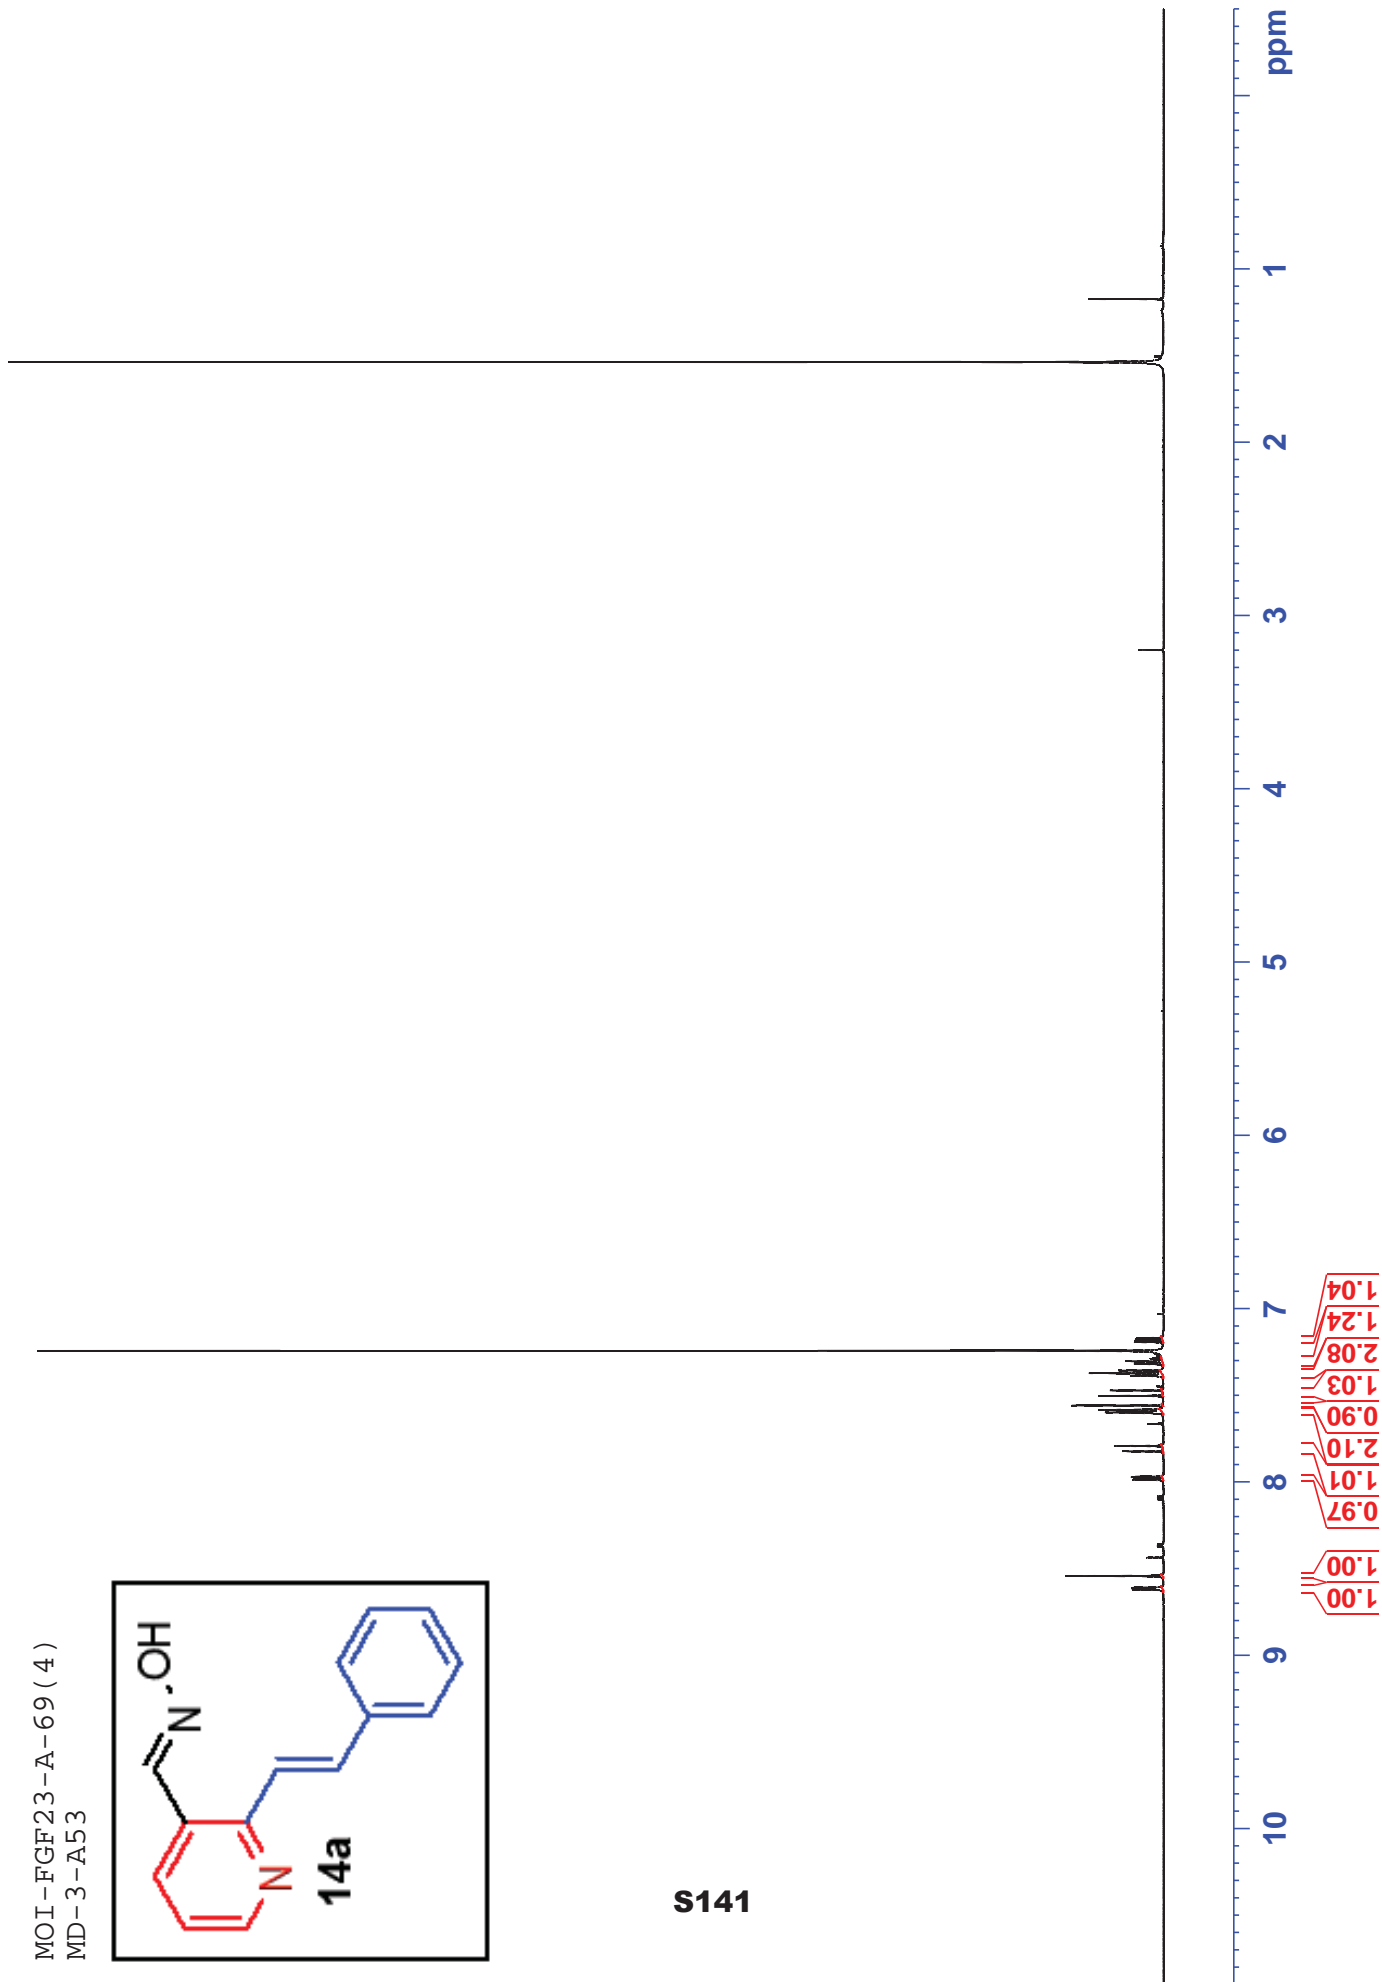

MOI-FGF23-A-69 (4)  
MD-3-A53

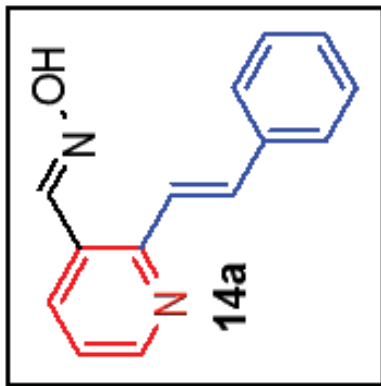

153.22  
150.63  
147.68  
136.77  
135.94  
135.39  
128.90  
128.83  
127.57  
125.30  
123.31  
122.25

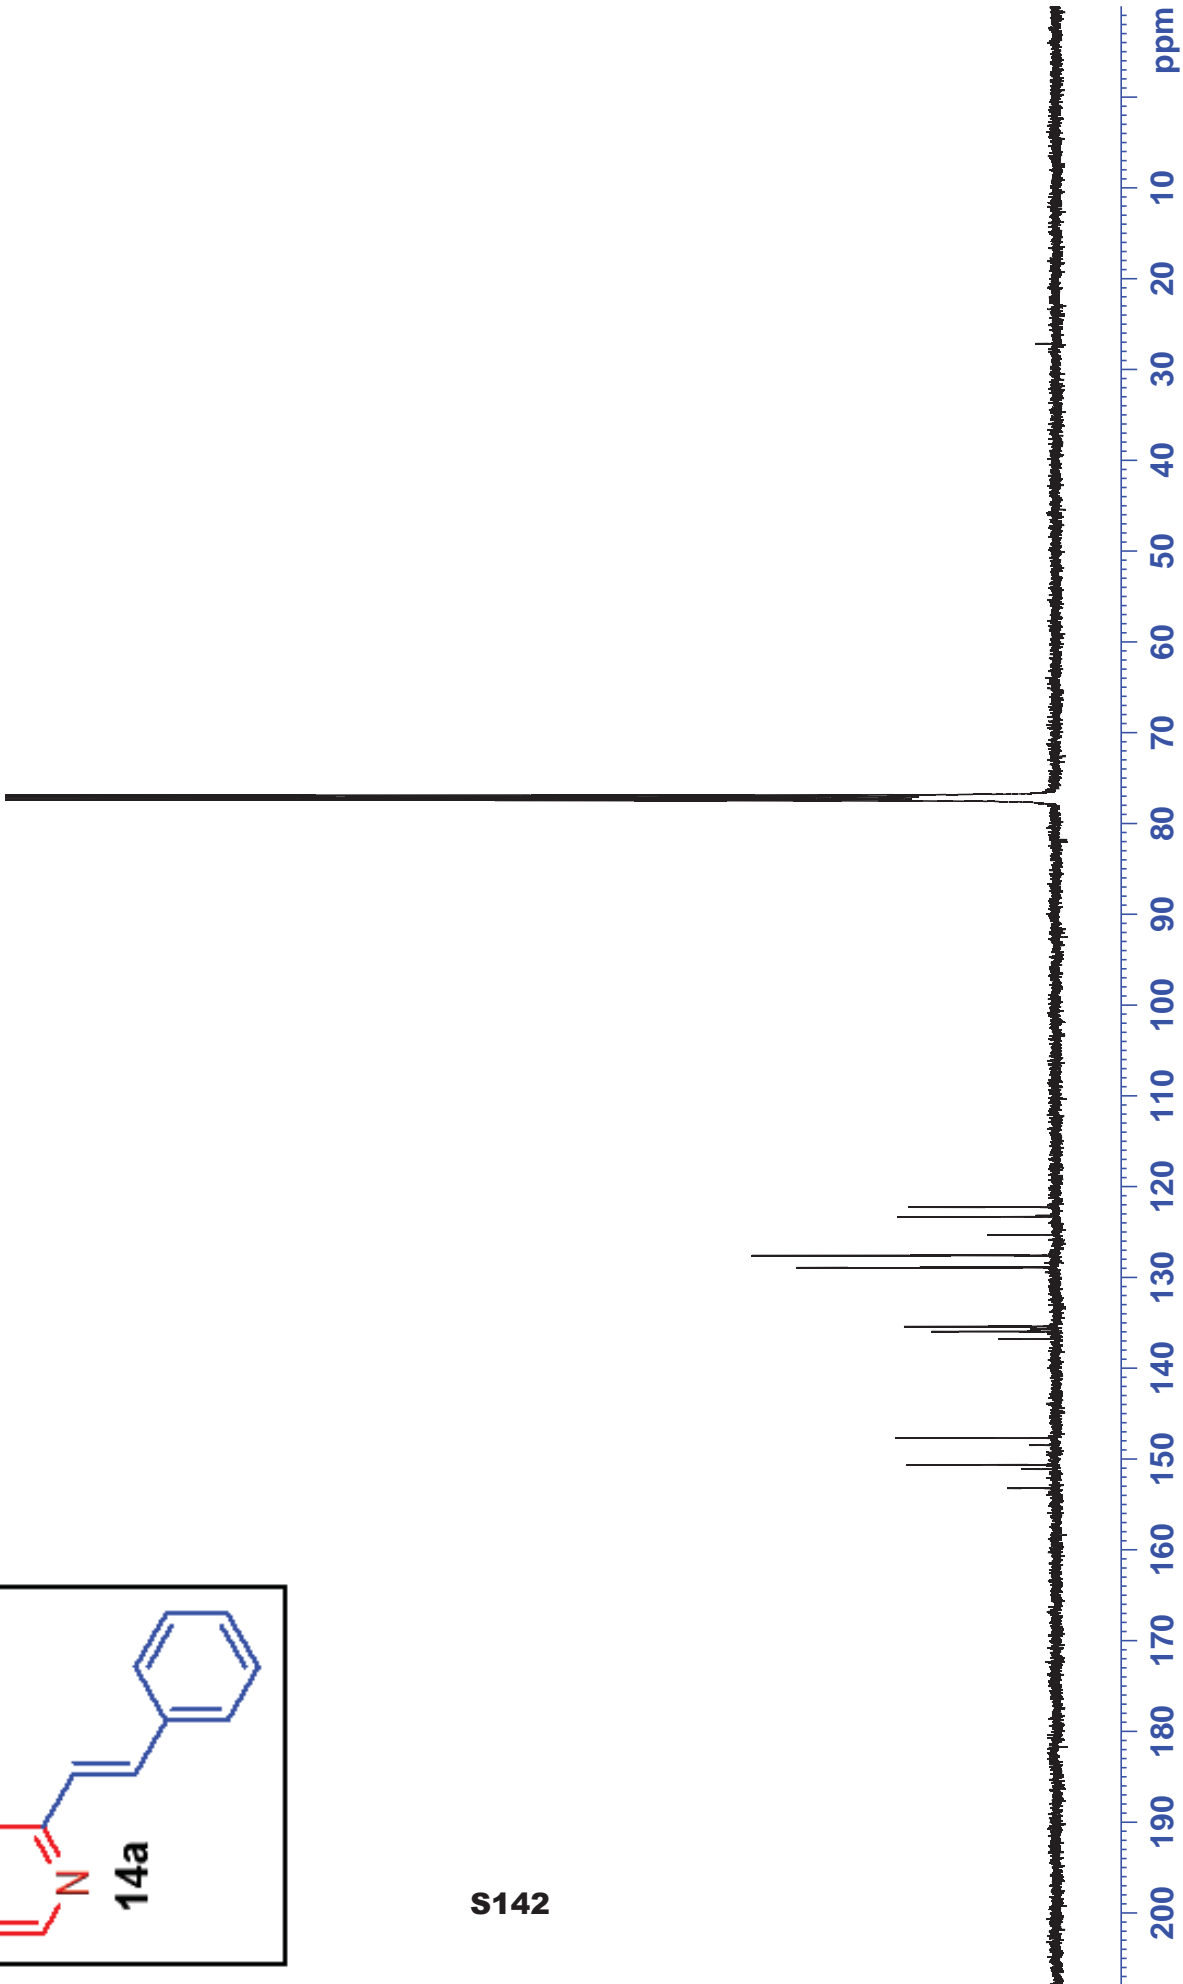

S142

MOI-FGF23-A-85 (3)  
MD-3-A54

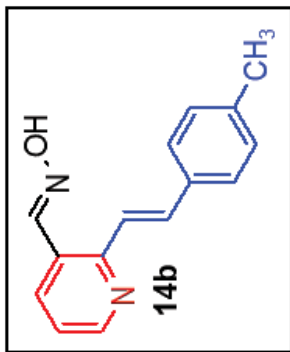

S143

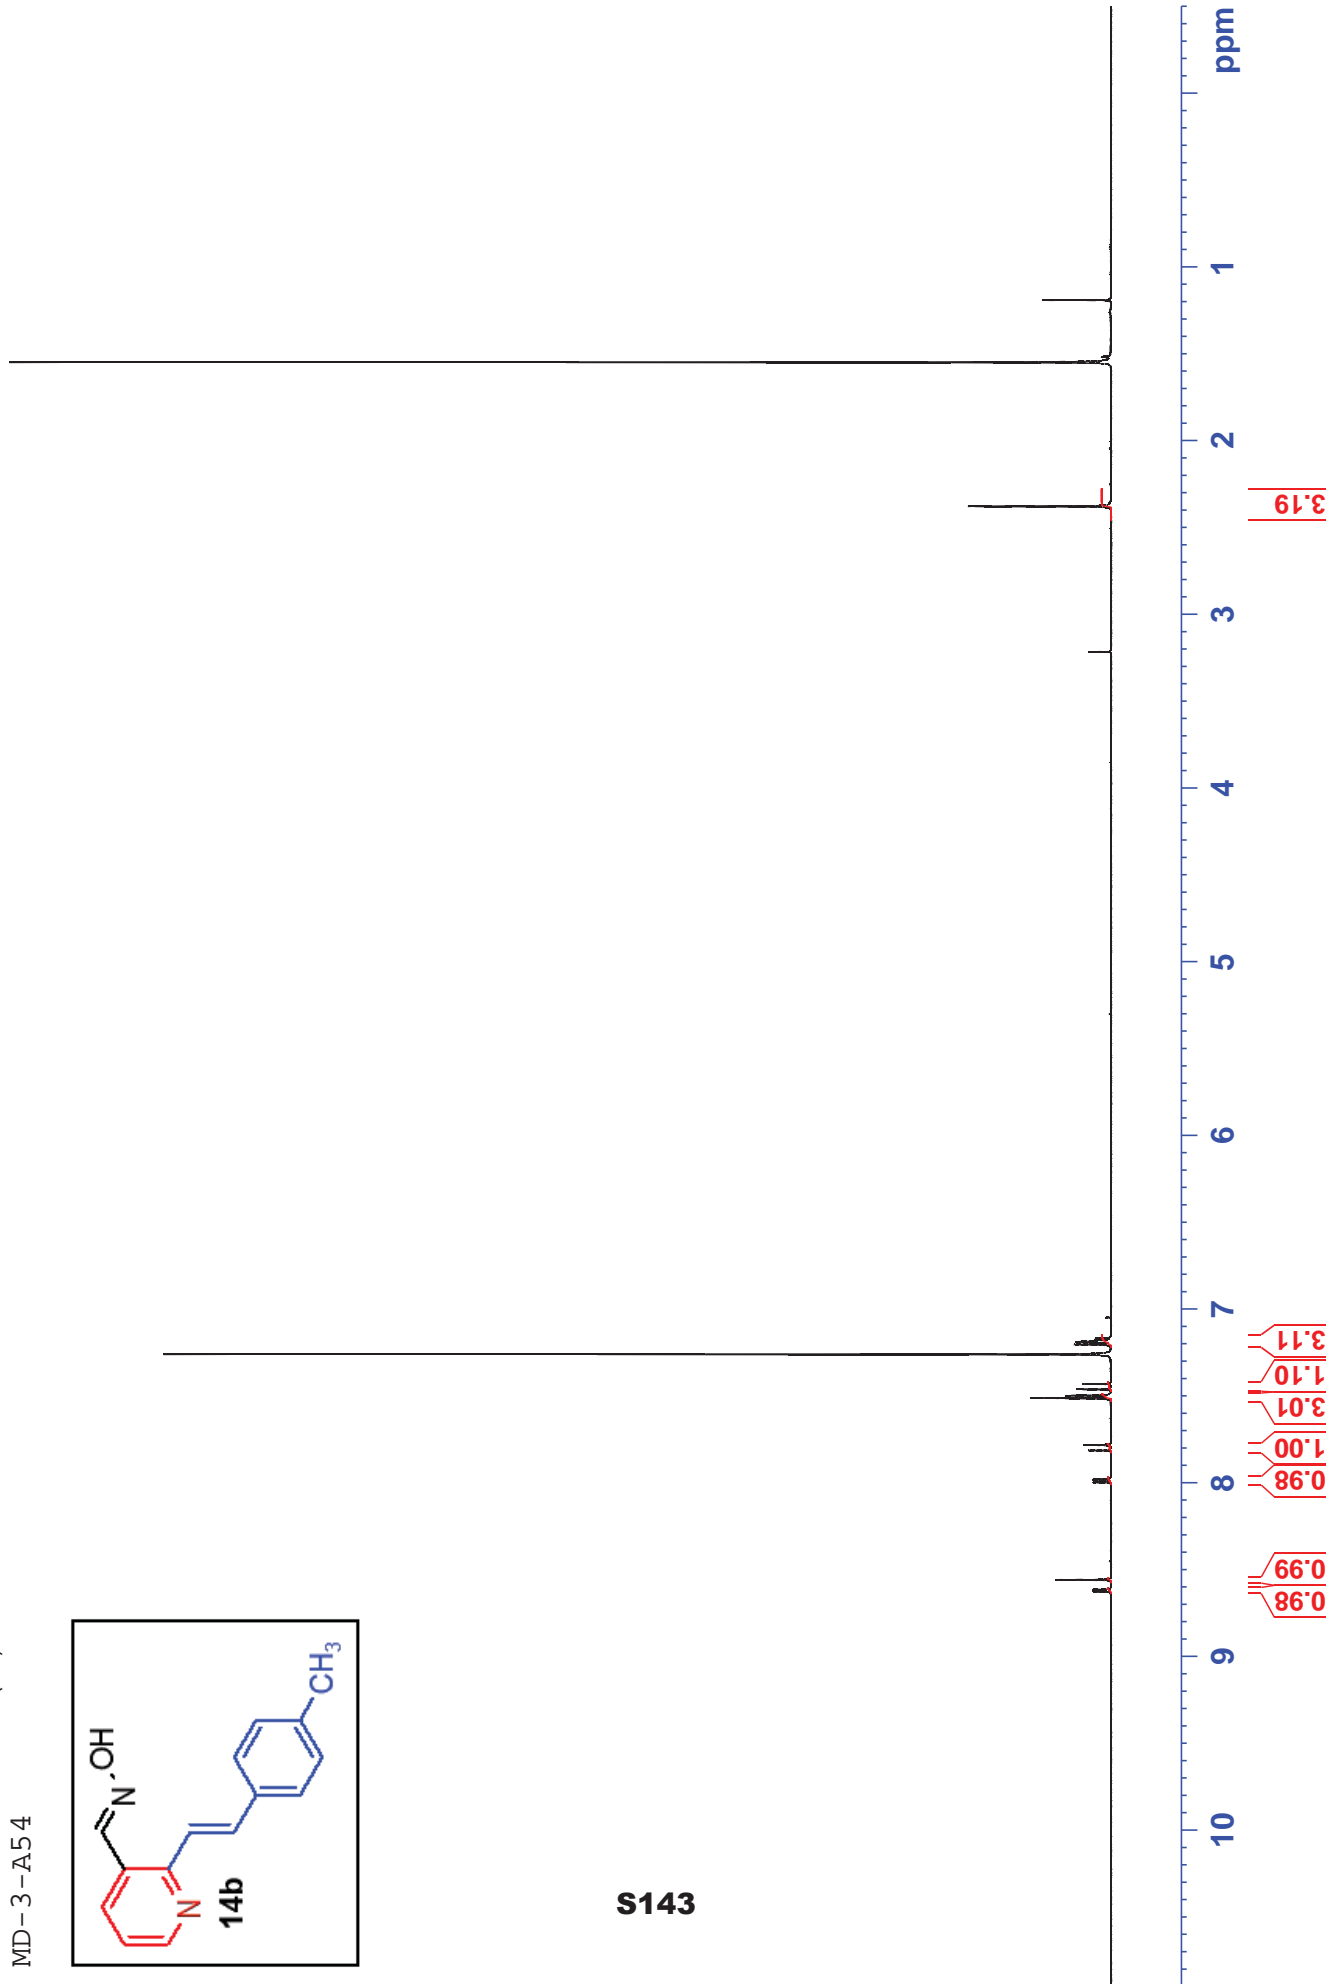

MOI-FGF23-A-85 (3)  
MD-3-A54

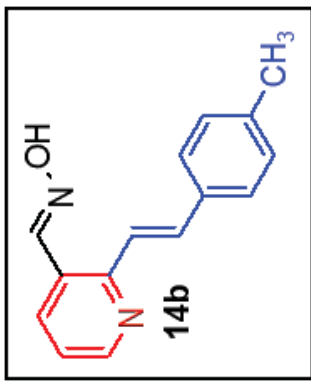

S144

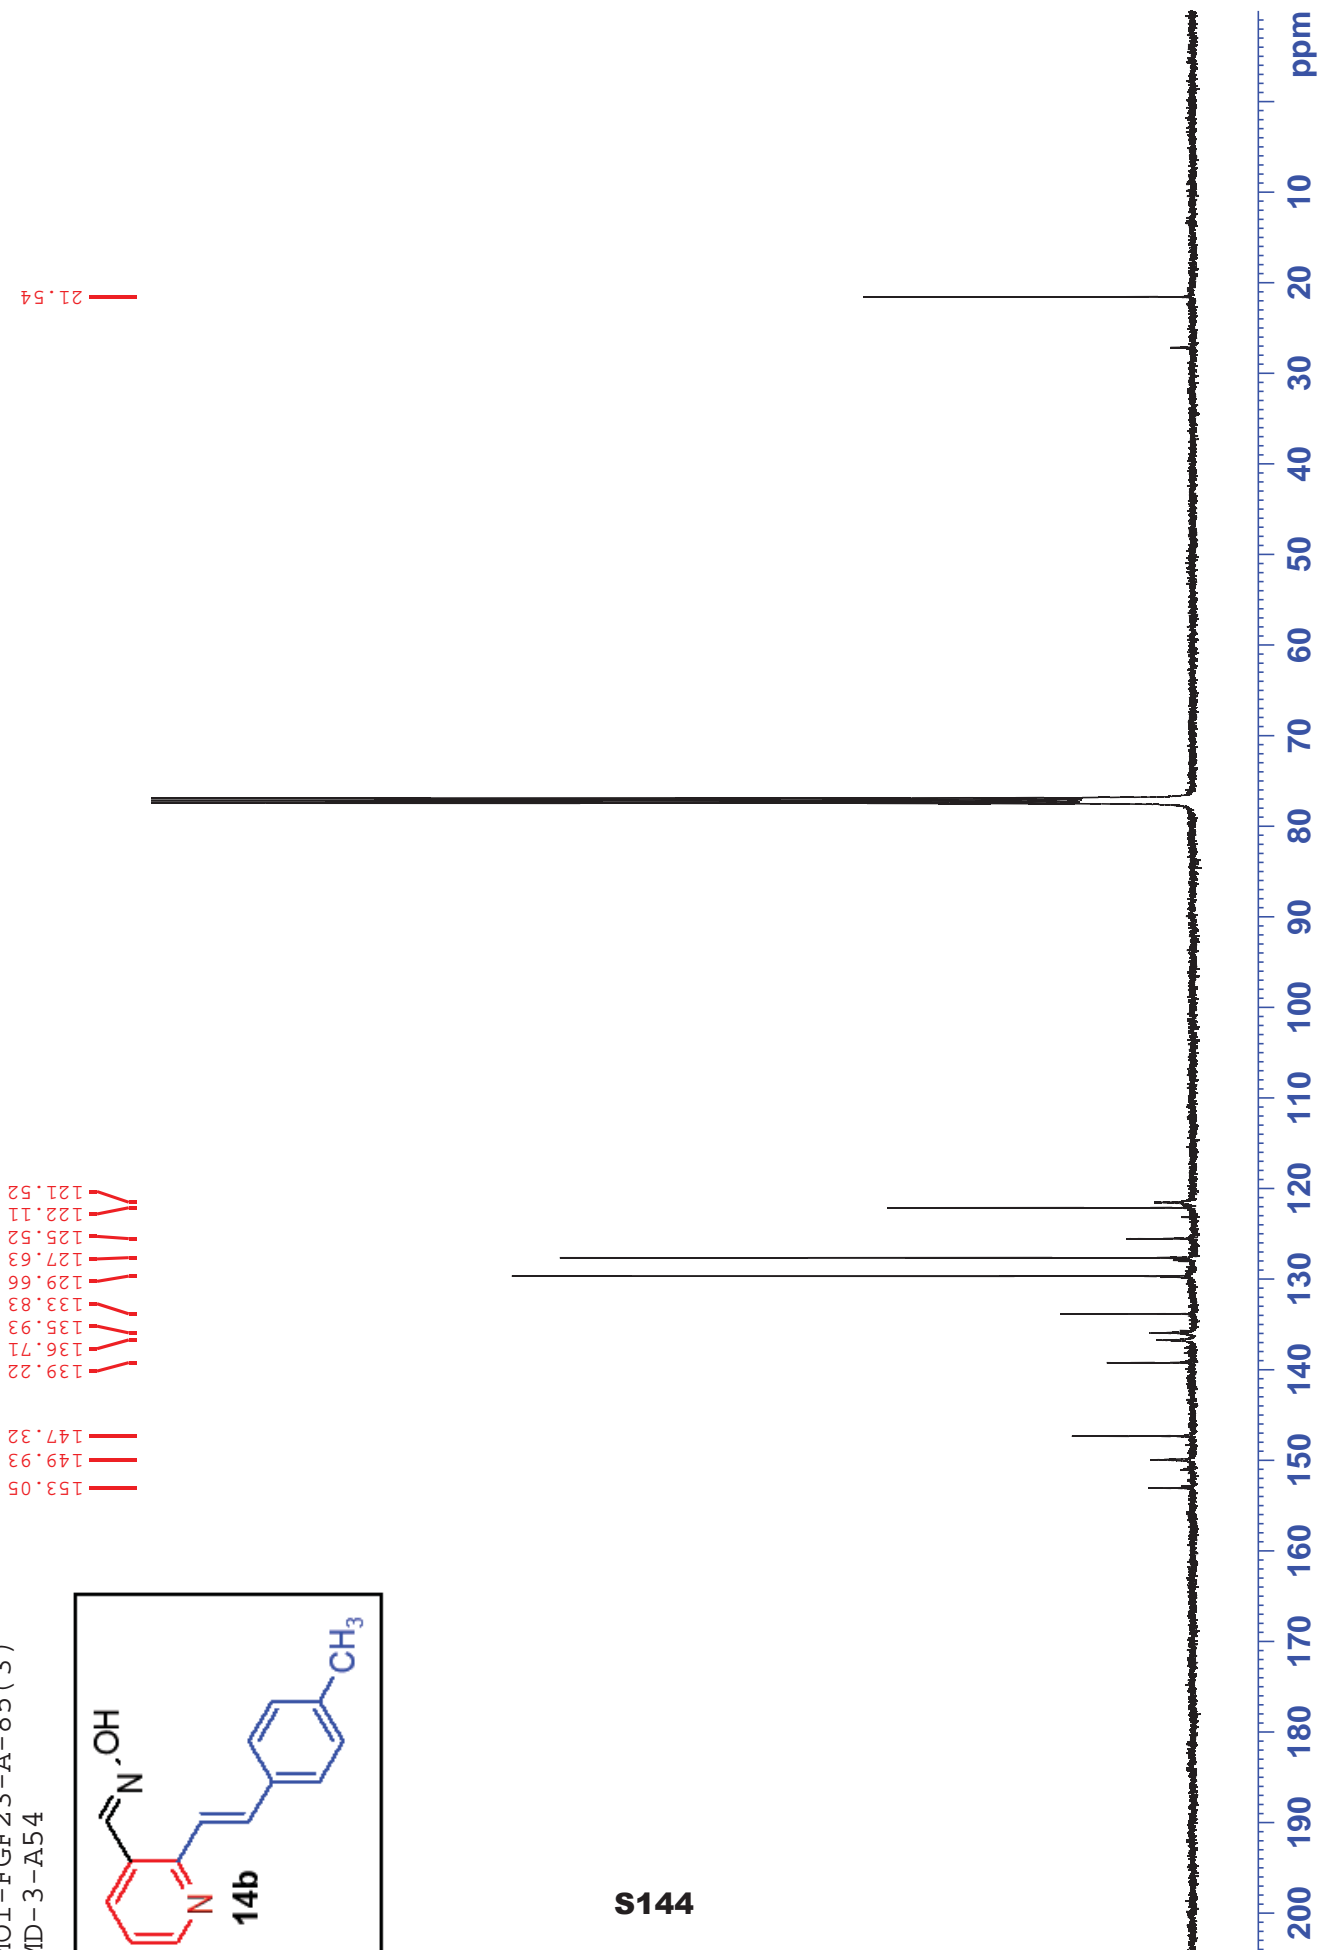

MOI-FGF23-A-137 (3)  
MD-3-A55

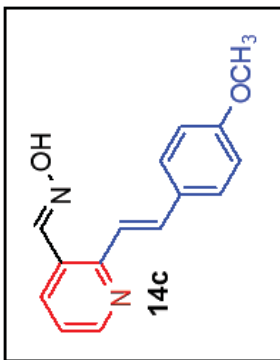

S145

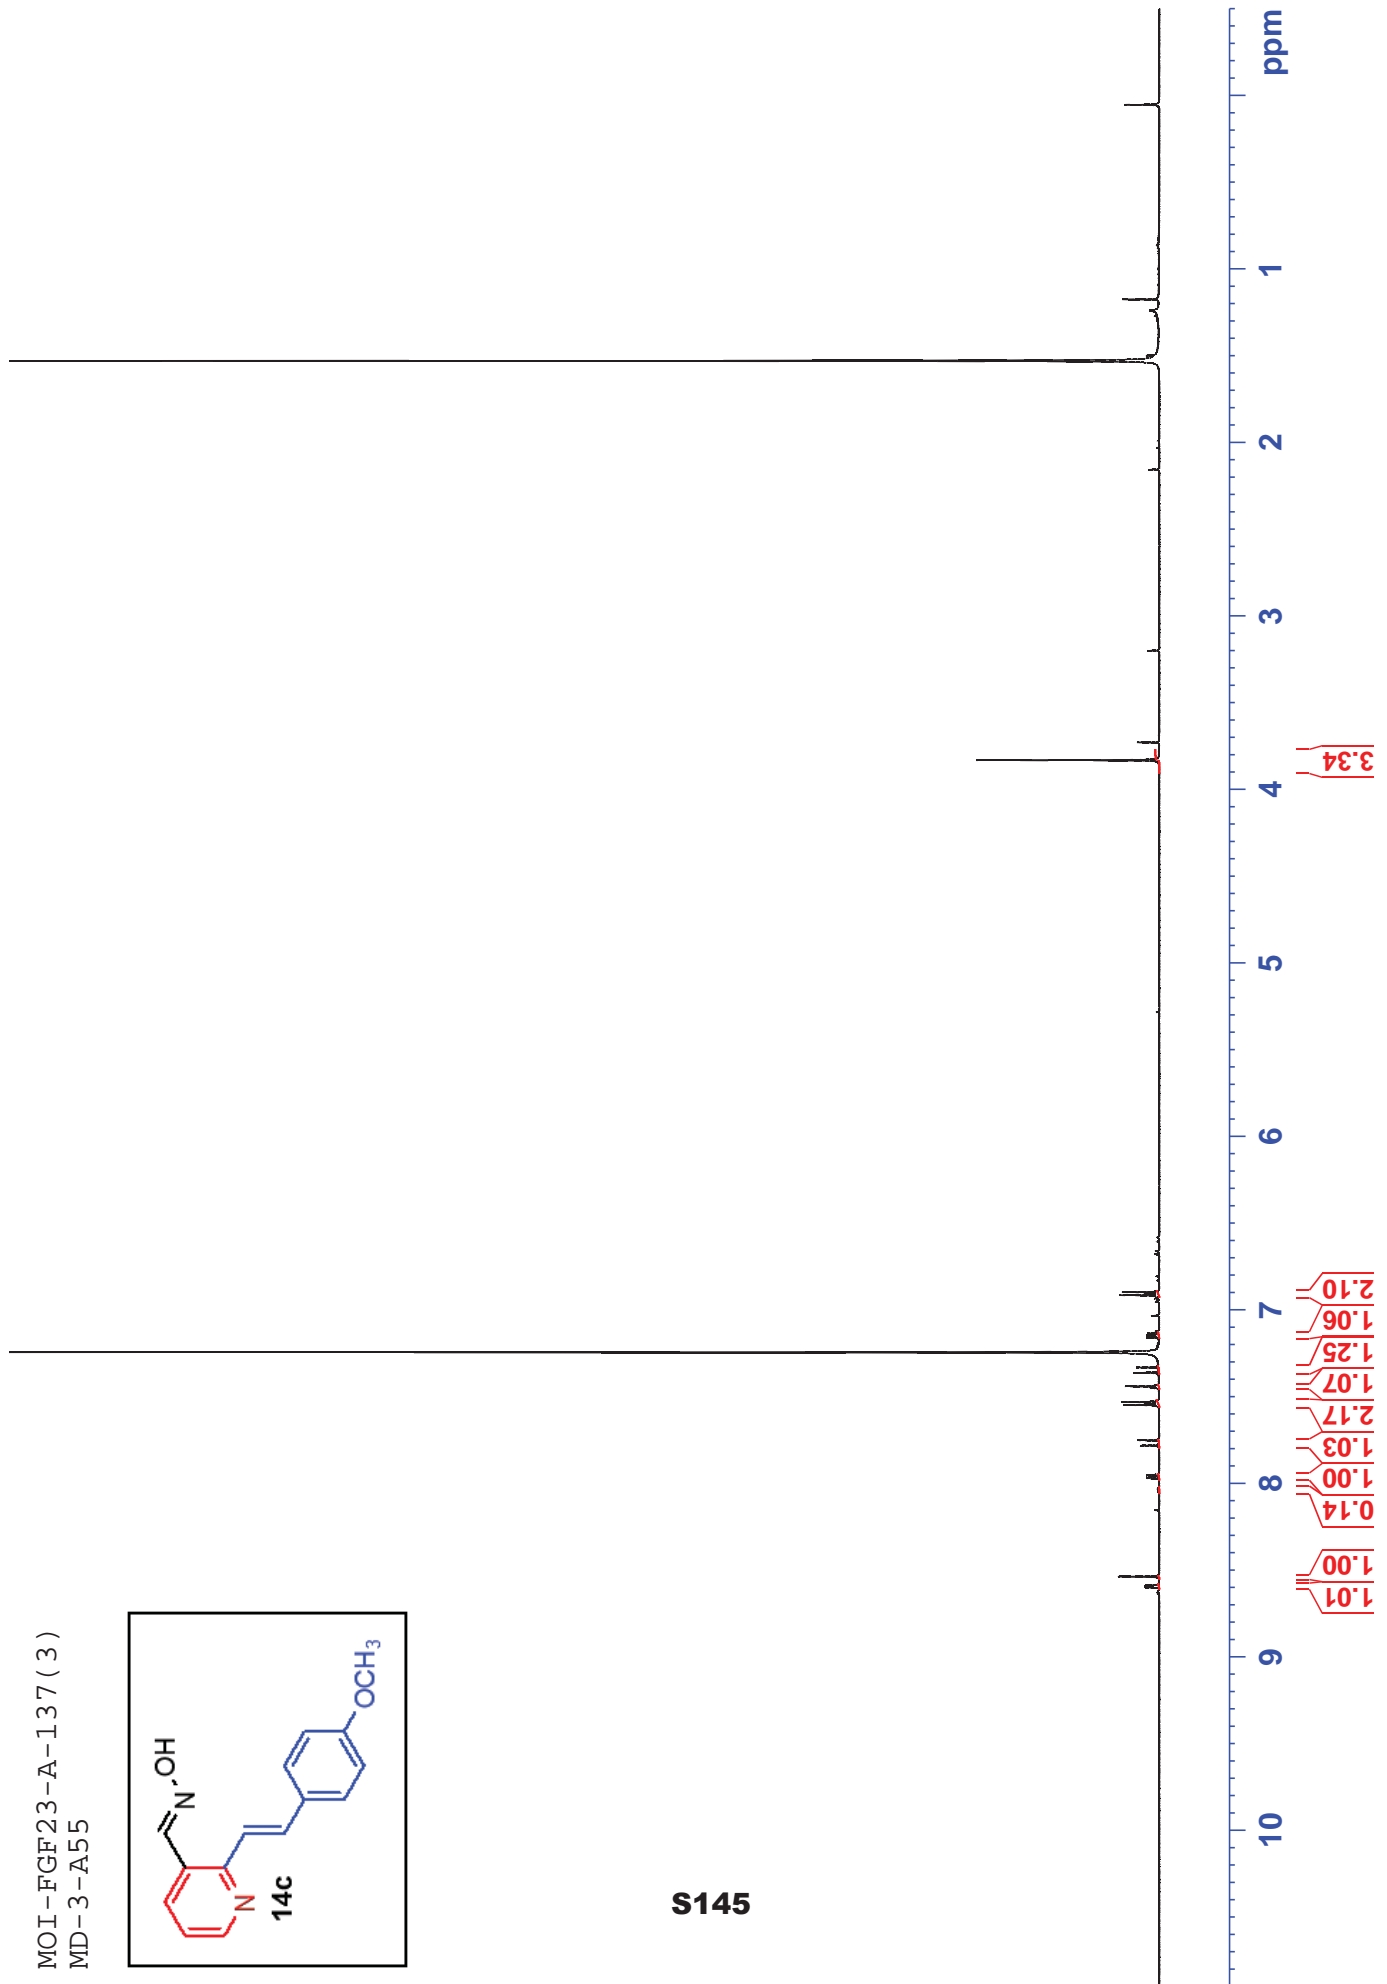

AEL-FGF23-A-139 (2)  
MD-3-A55

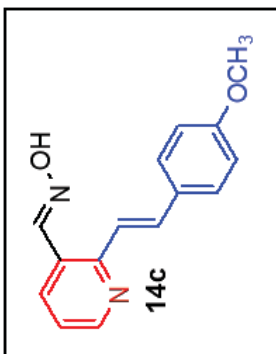

160.30  
153.55  
150.53  
147.64  
135.57  
135.32  
129.54  
128.96  
124.97  
121.85  
120.99  
114.34  
55.48

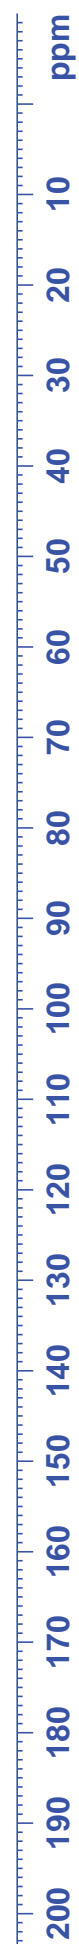

S146

MOI-FGF23-67 (6)  
MD-3-A56

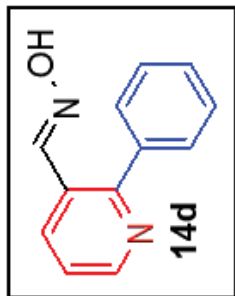

S147

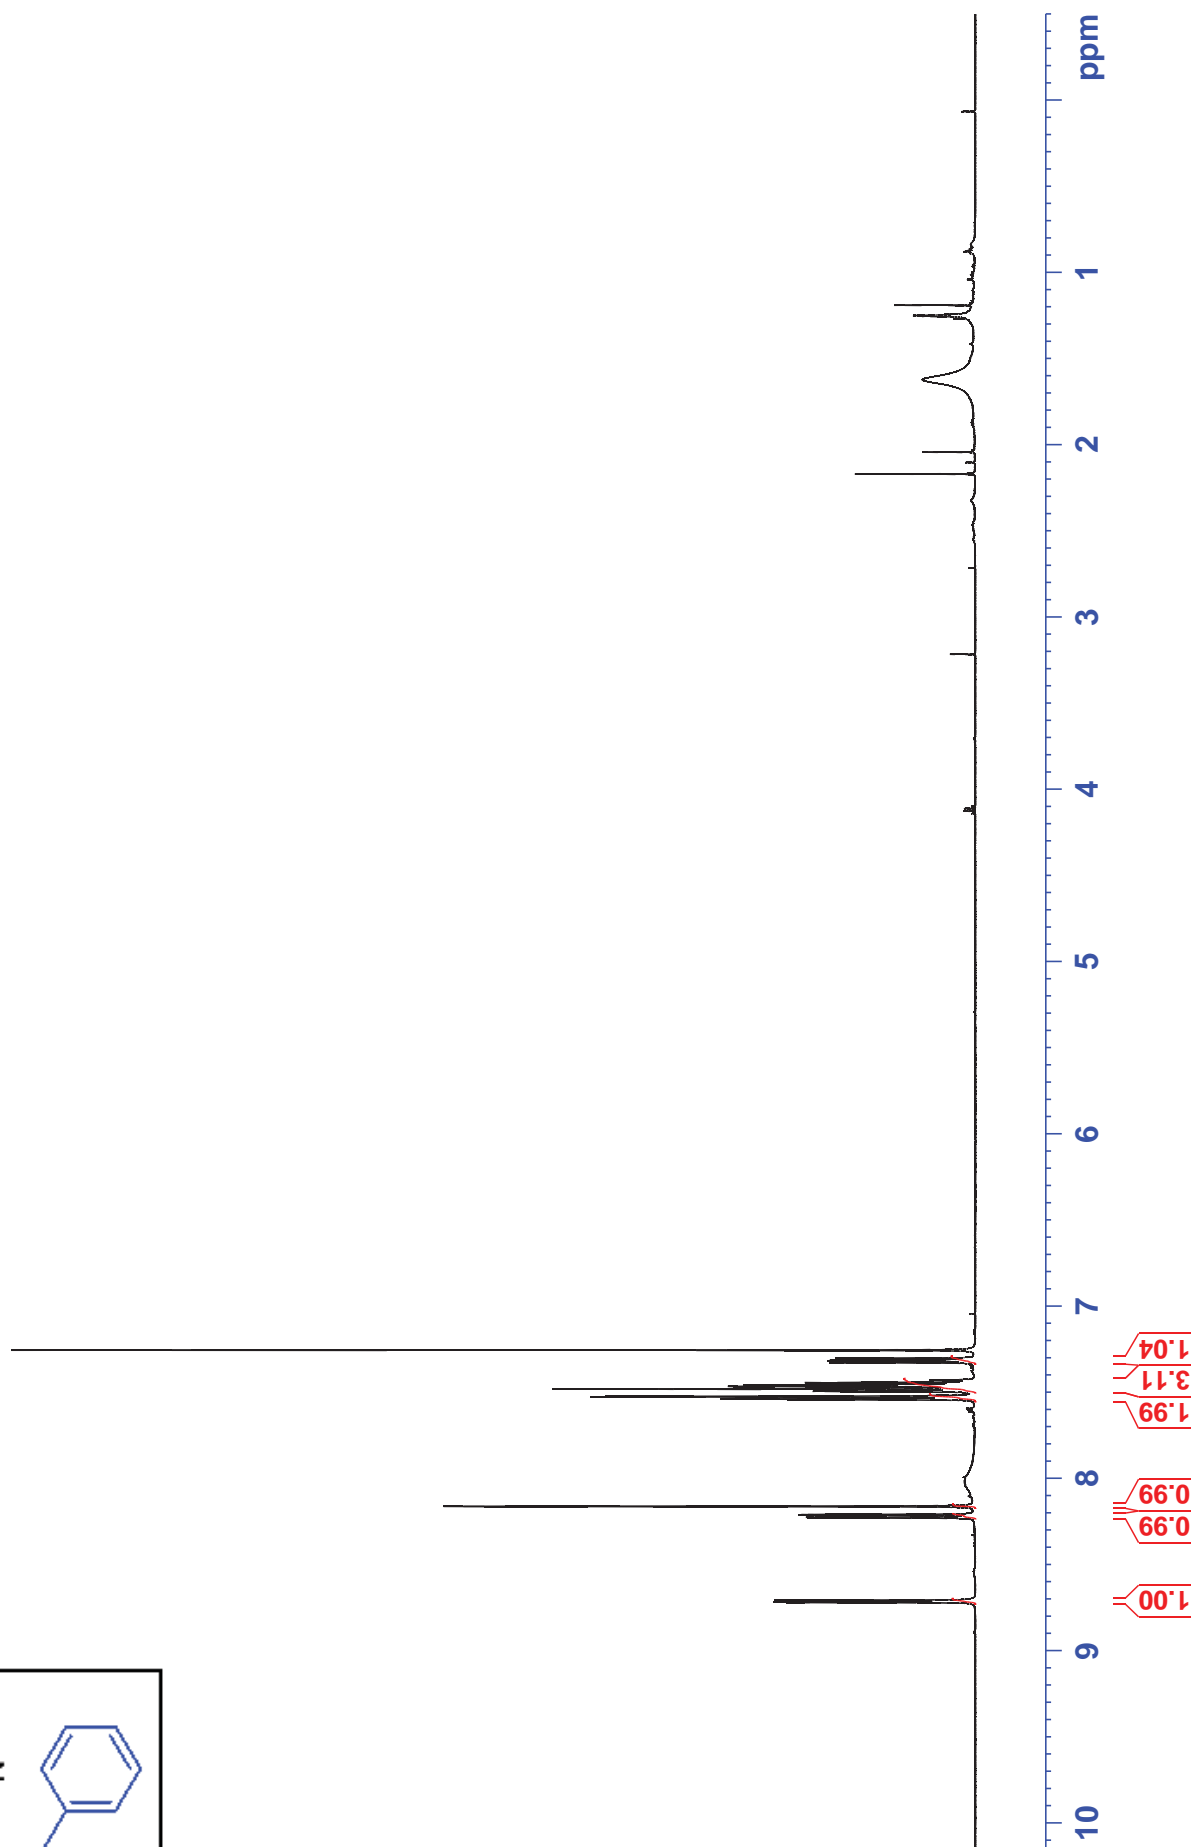

MOI-FGF23-A-67 (4)  
MD-3-A56

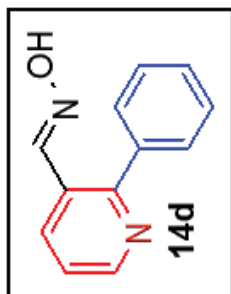

158.49  
150.54  
148.48  
138.56  
134.62  
129.83  
128.97  
128.61  
126.07  
122.49

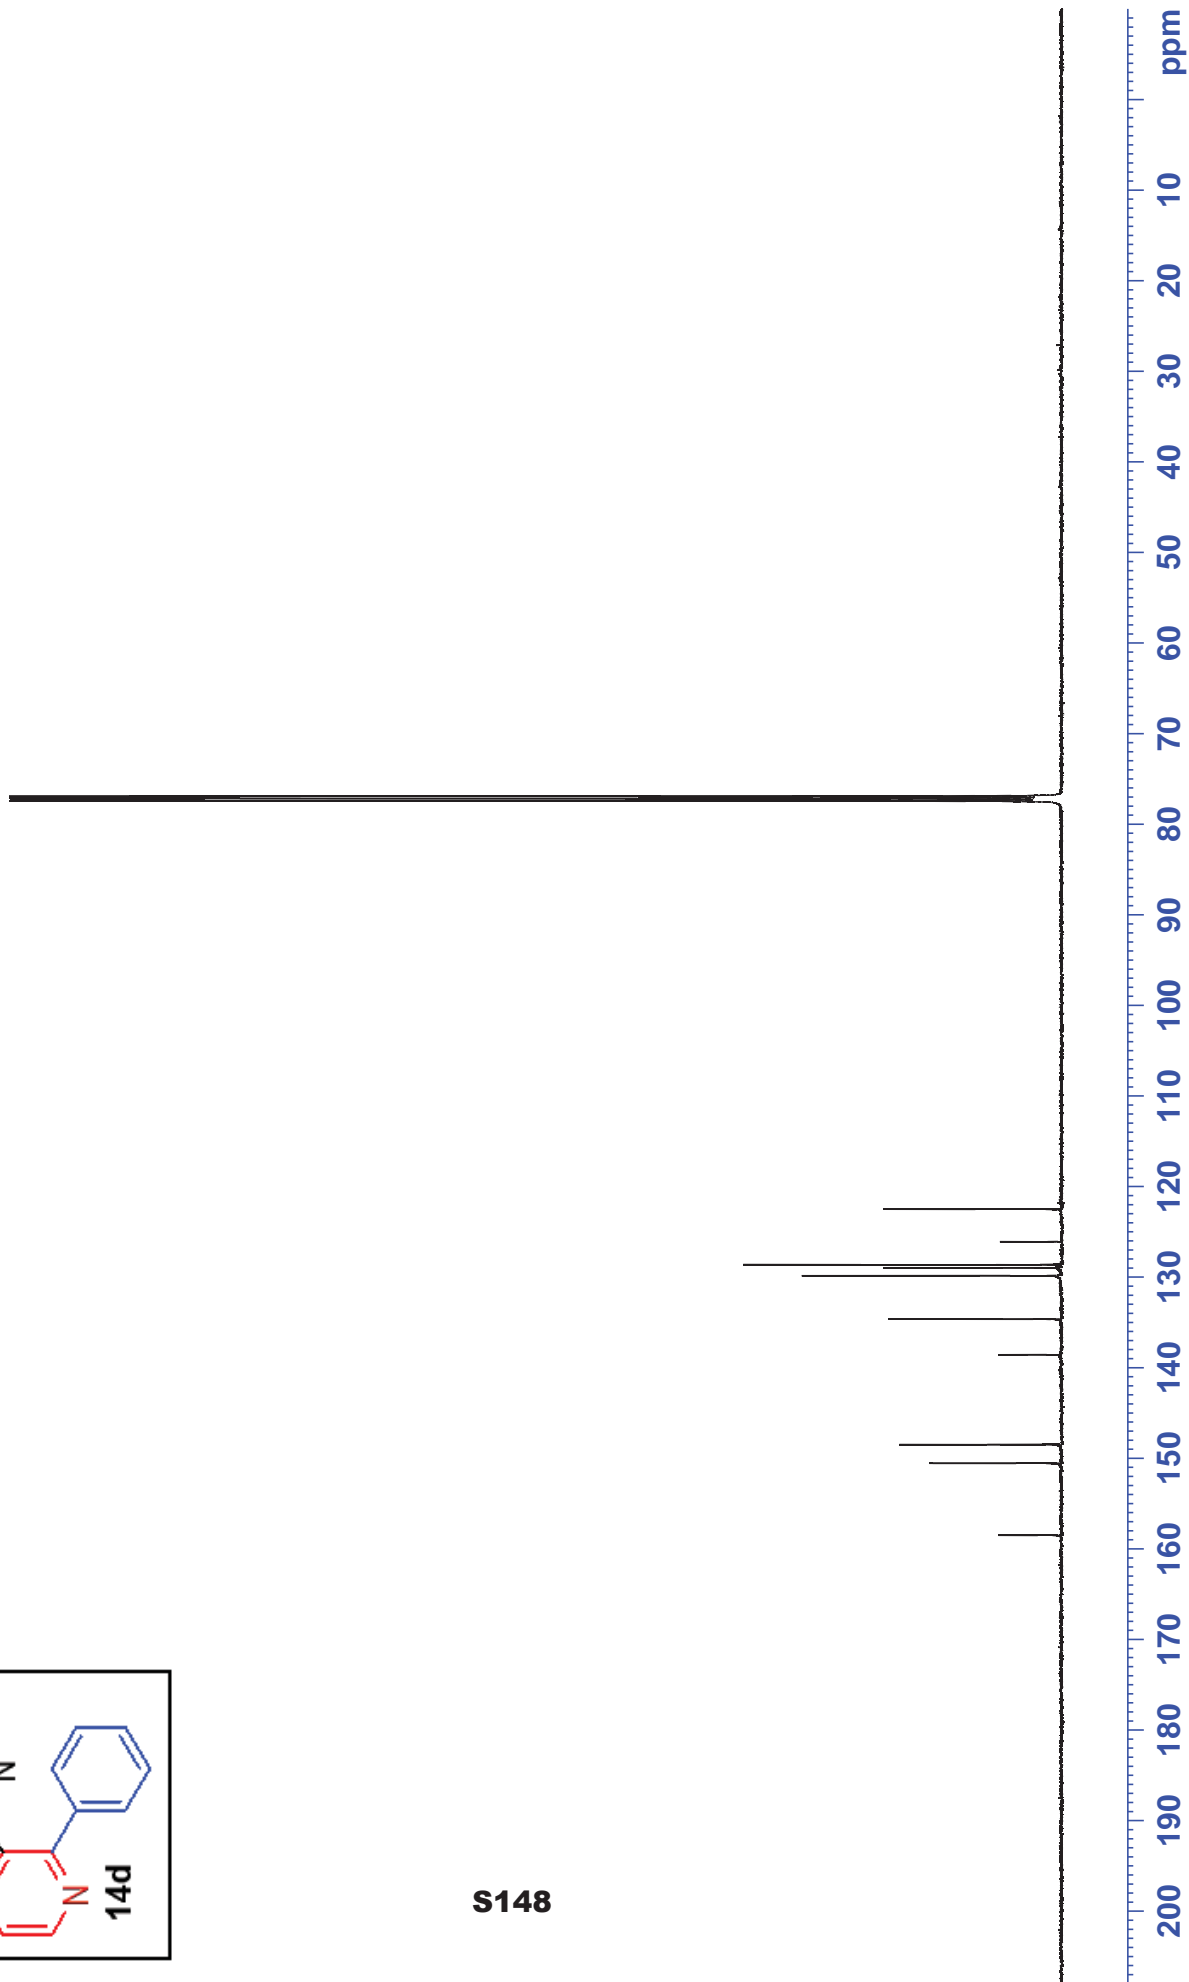

S148



MOI-FGF23-A-127 (3)  
MD-3-A57

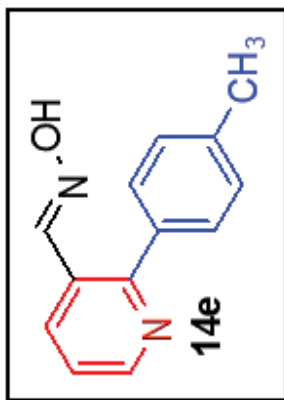

S149

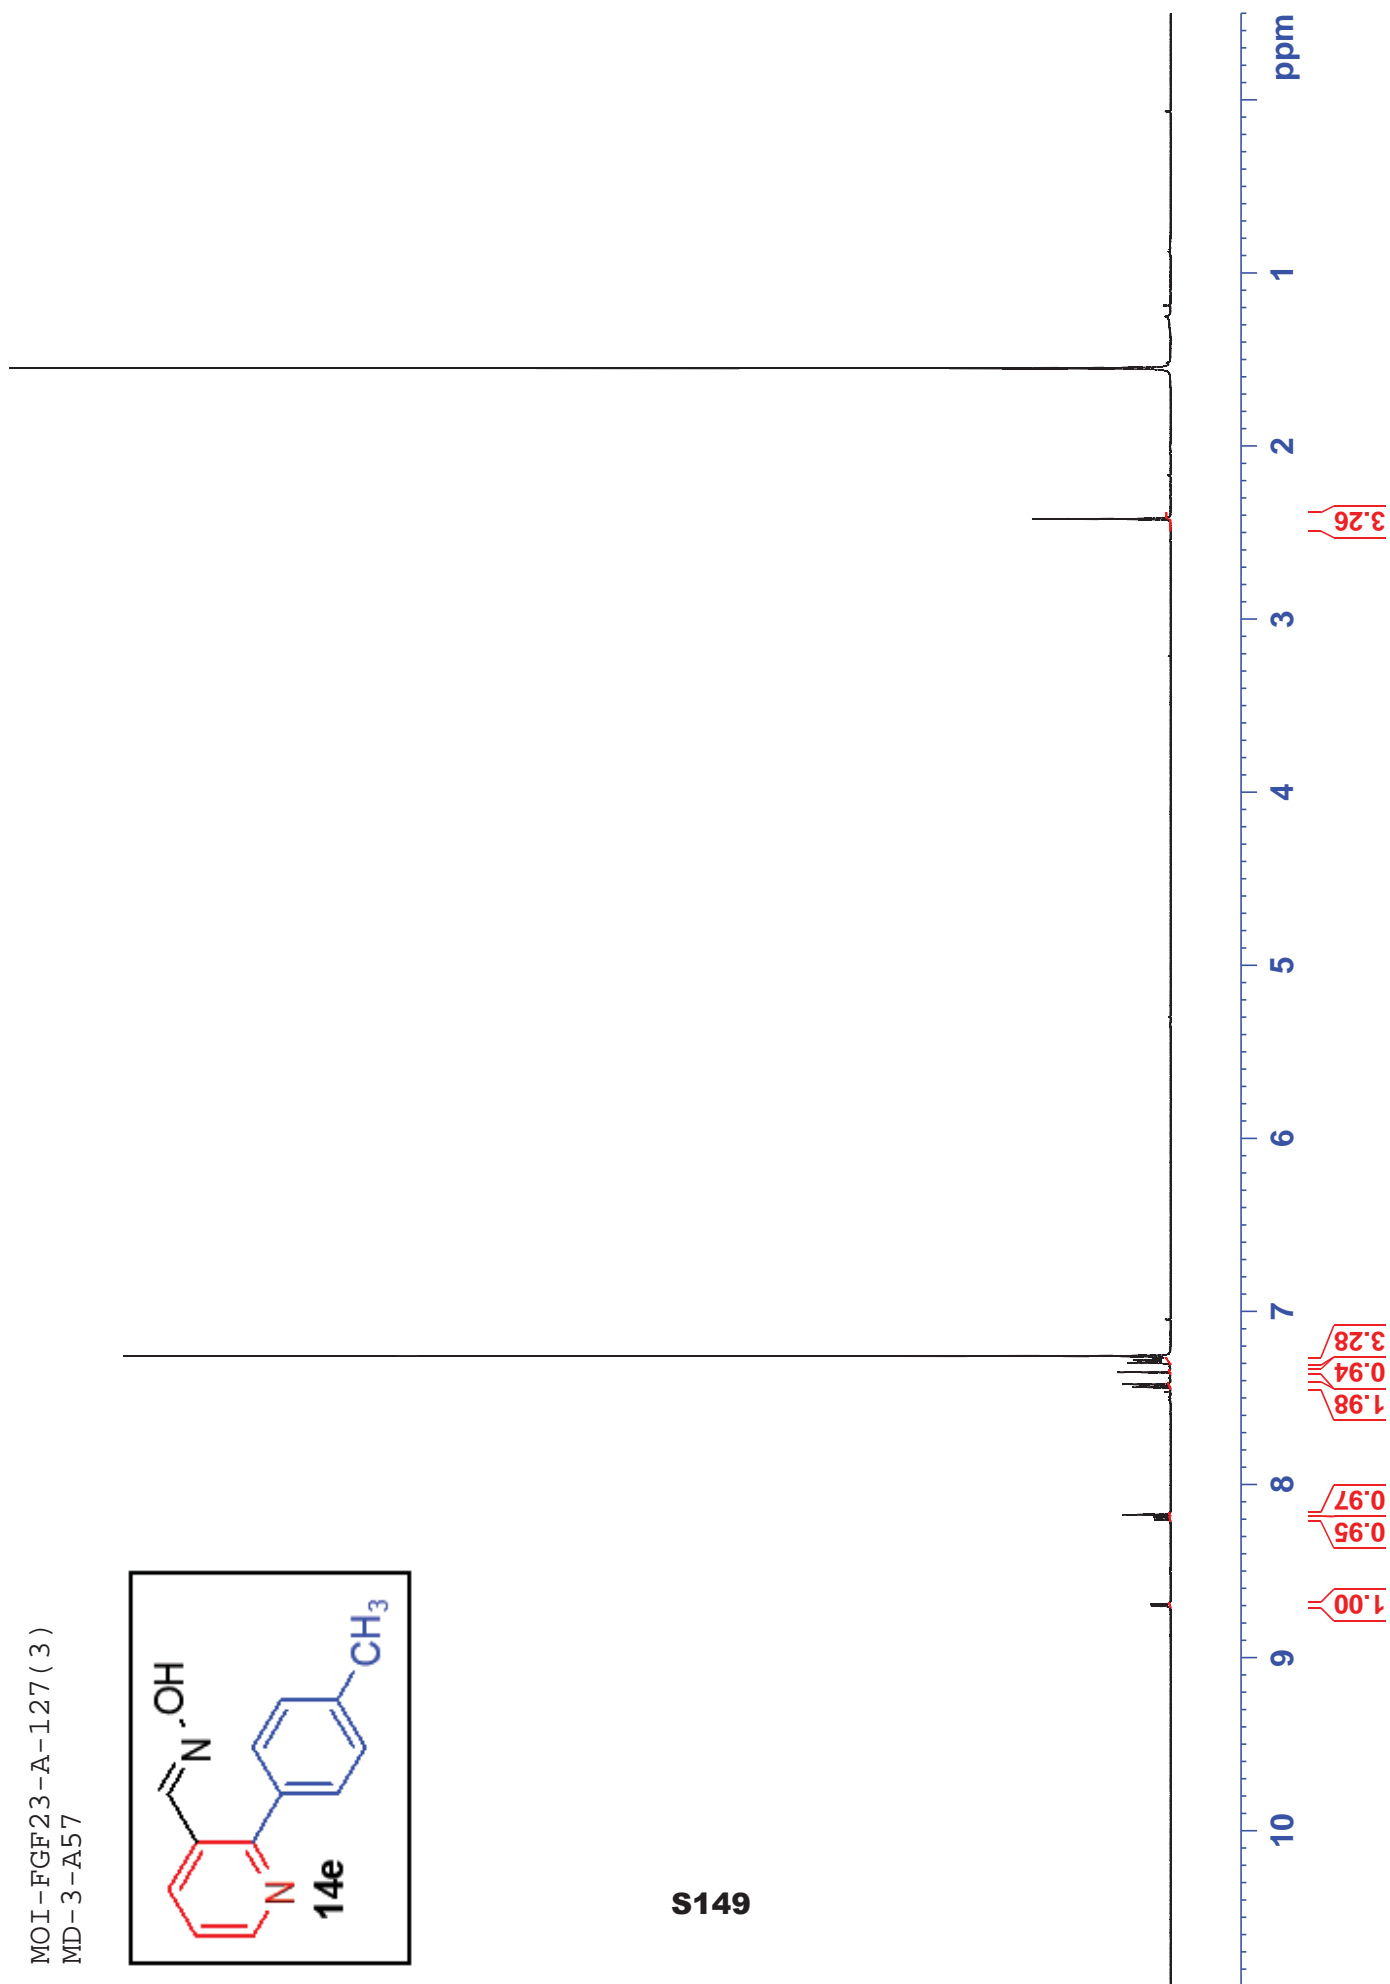

MOI-FGF23-A-127 (3)  
MD-3-A57

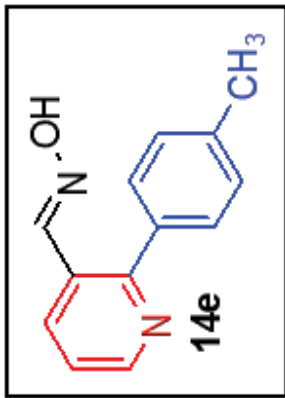

- 158.61
- 150.60
- 148.94
- 138.94
- 135.81
- 134.58
- 129.77
- 129.31
- 125.82
- 122.22
- 21.45

S150

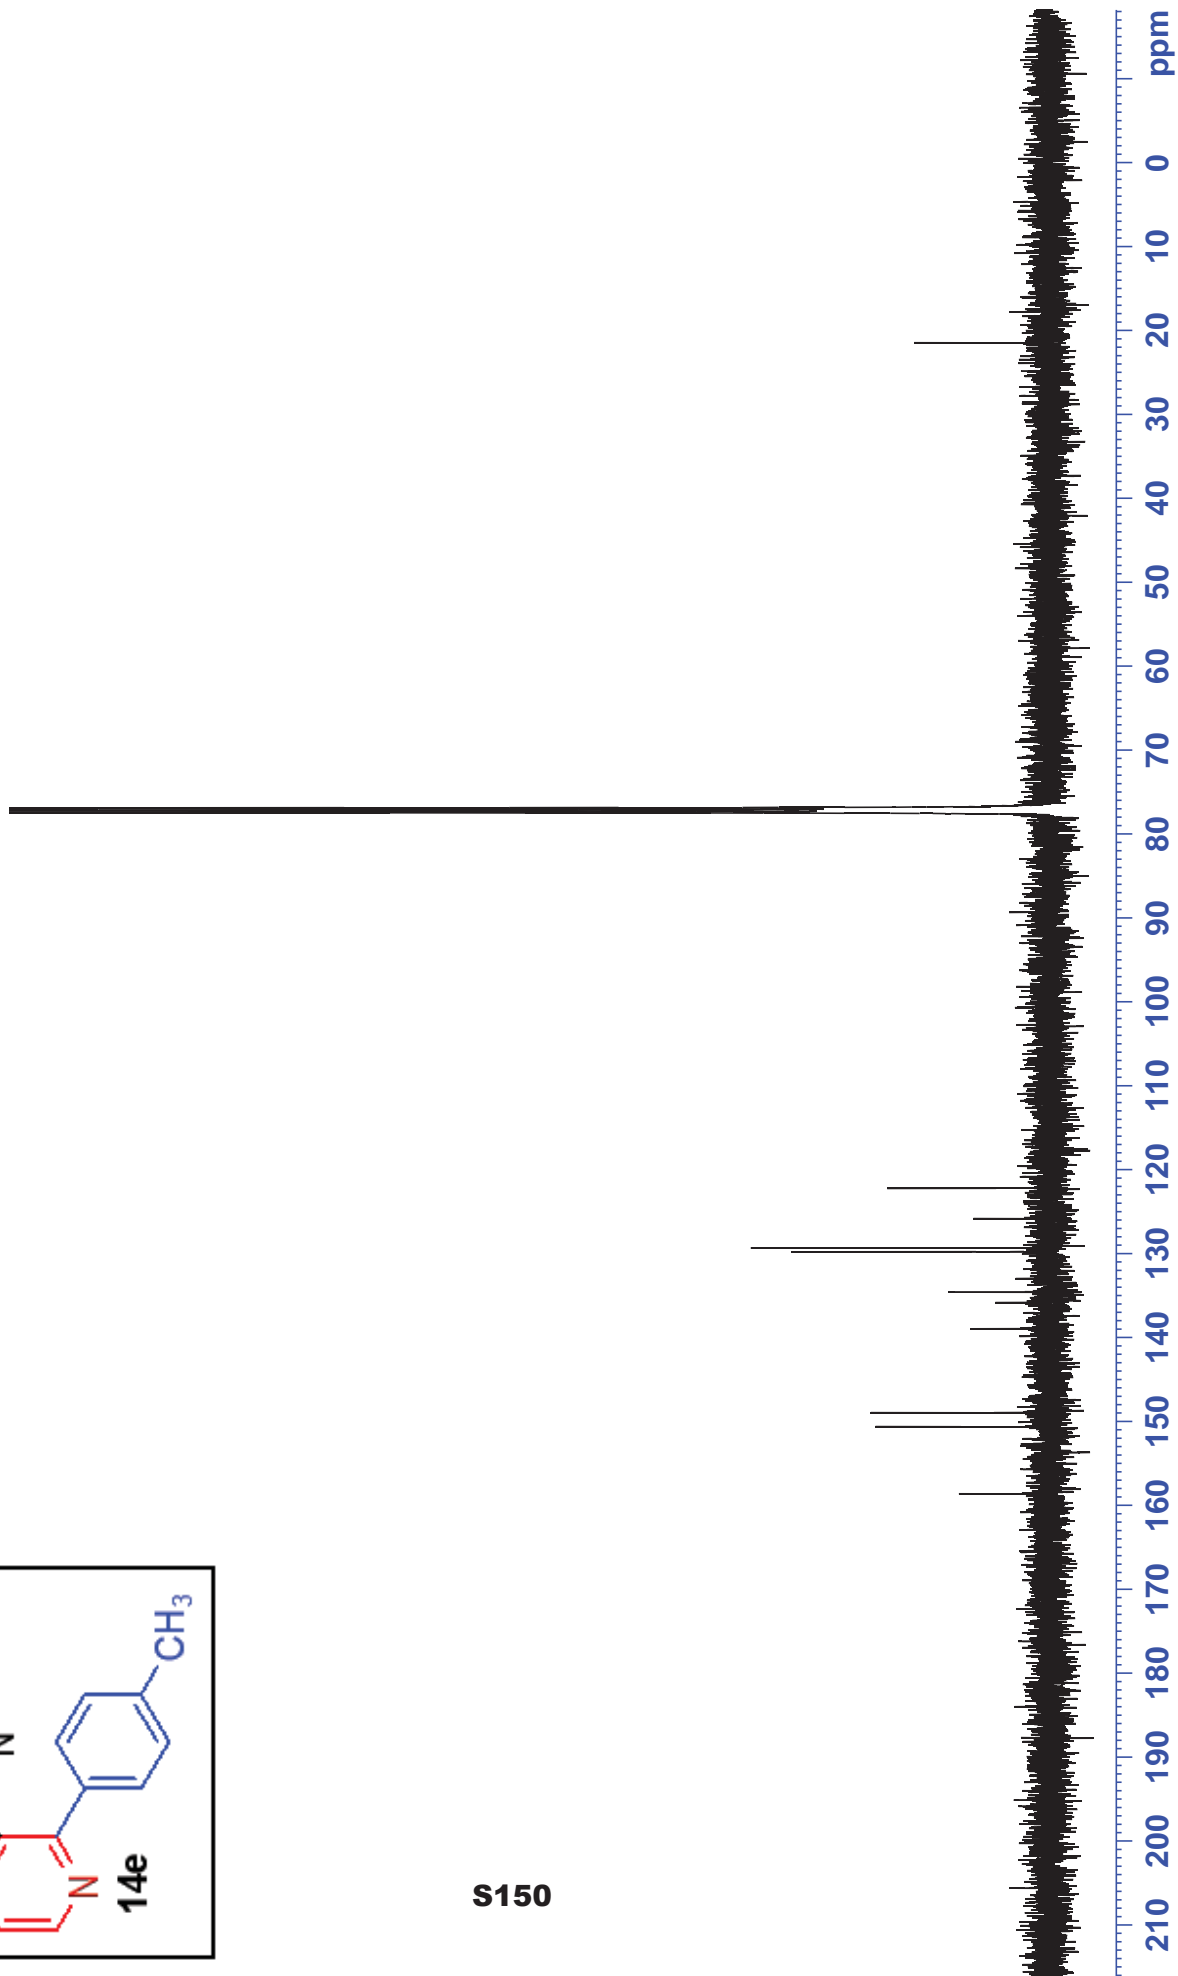

MOI-FGF23-A-87 (5)  
MD-3-A58

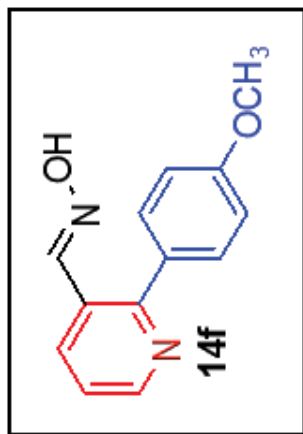

S151

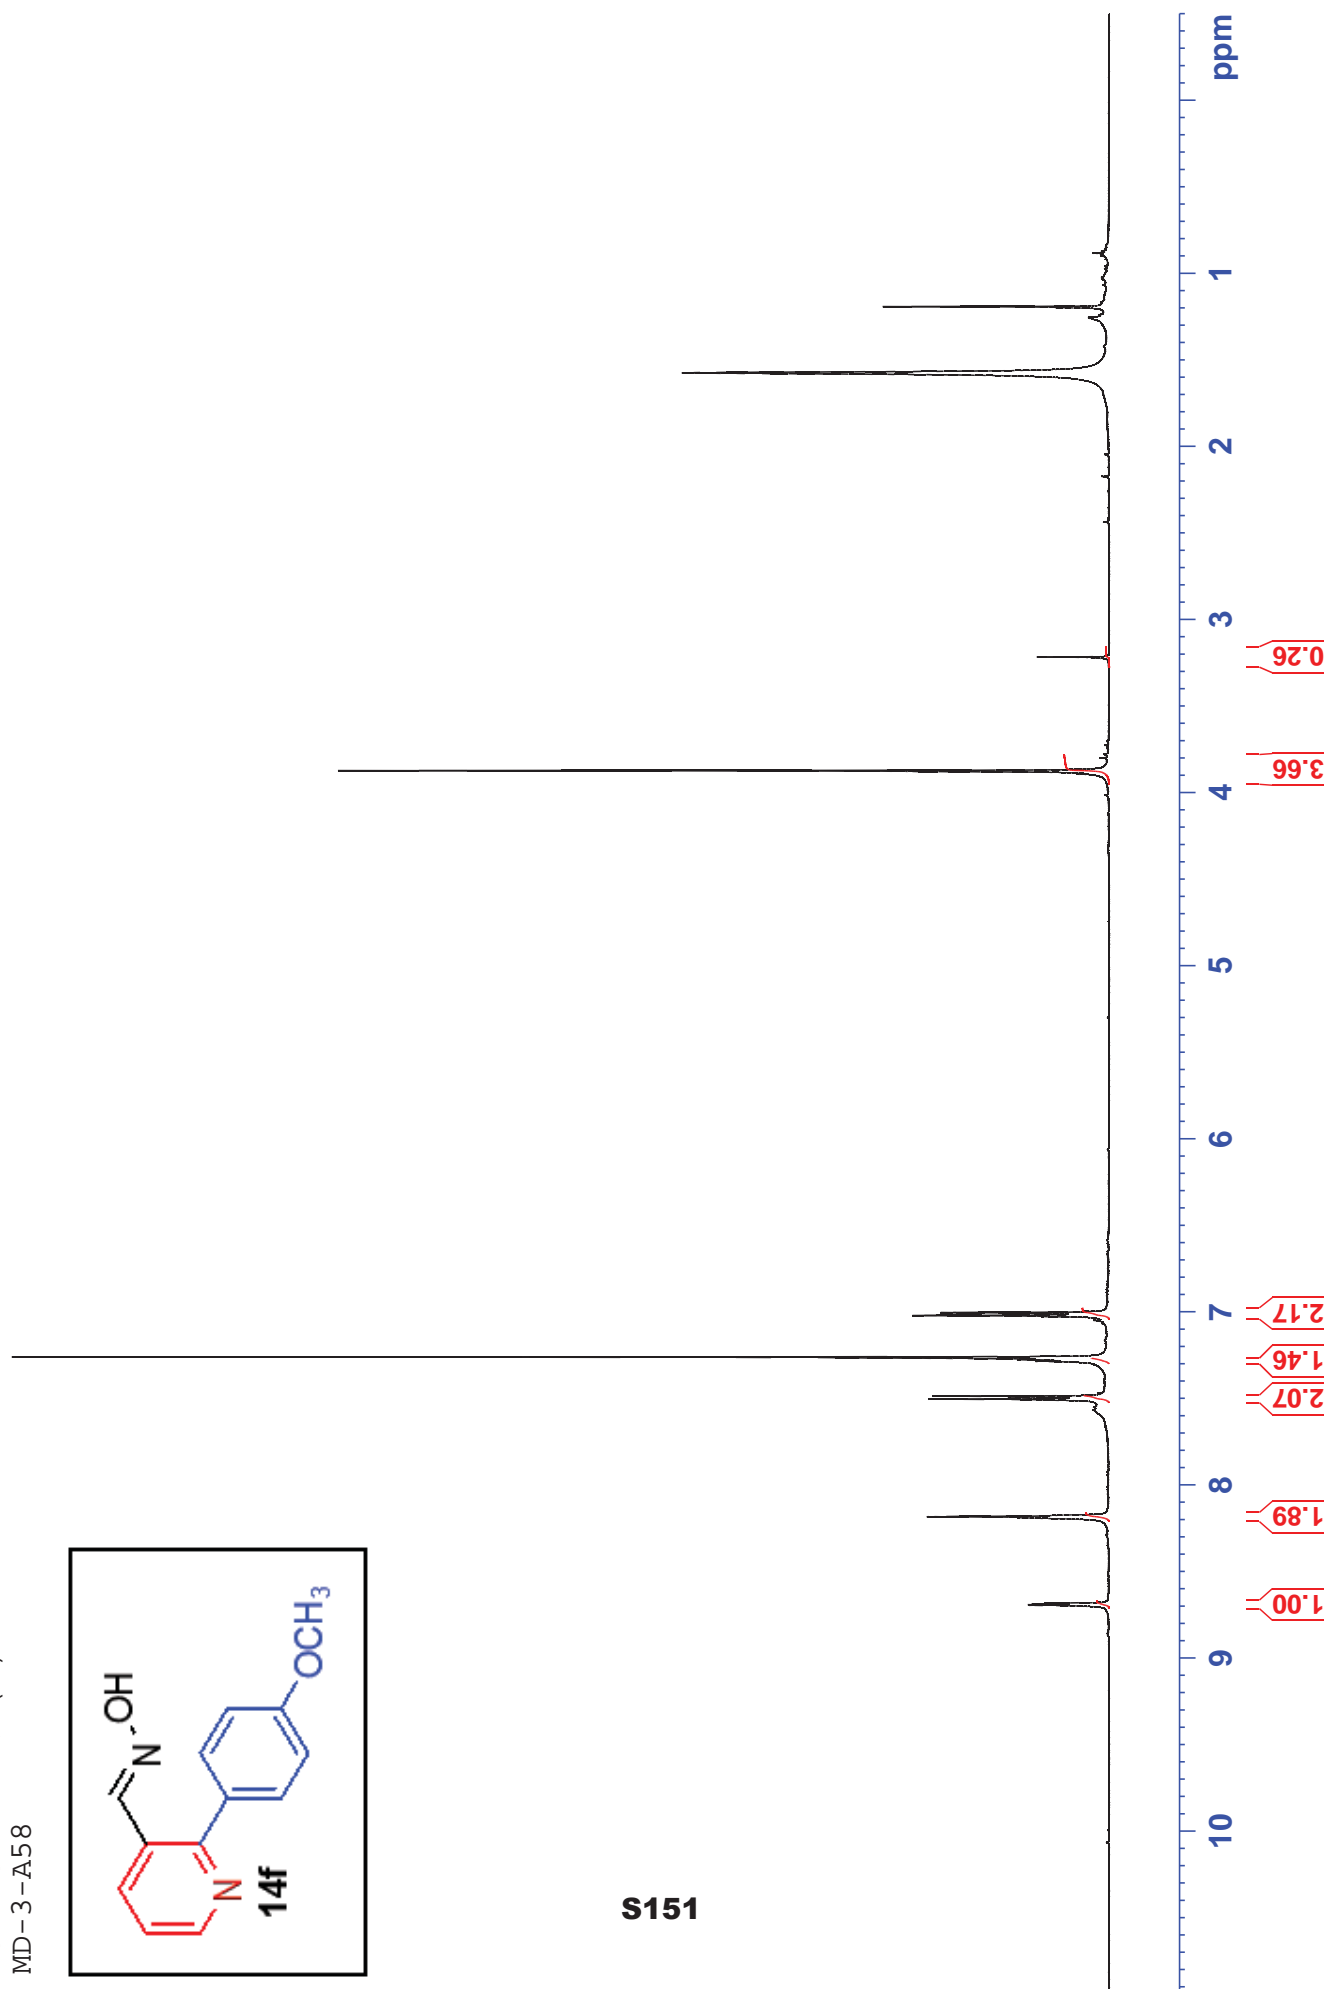

MOI-FGF23-A-87 (5)  
MD-3-A58

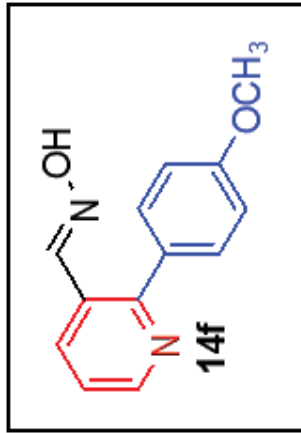

160.35  
158.18  
150.56  
148.97  
134.74  
131.26  
131.14  
125.69  
122.02  
114.08  
55.54

S152

200 190 180 170 160 150 140 130 120 110 100 90 80 70 60 50 40 30 20 10 ppm

MOI-FGF23-A-77(5)  
RCHO of MD-3-A59

S153

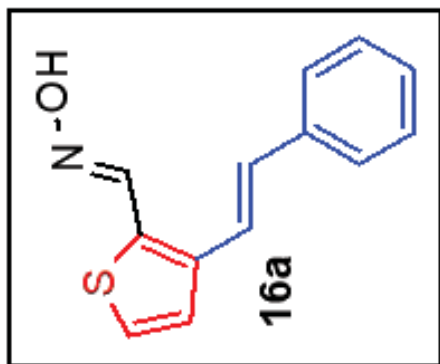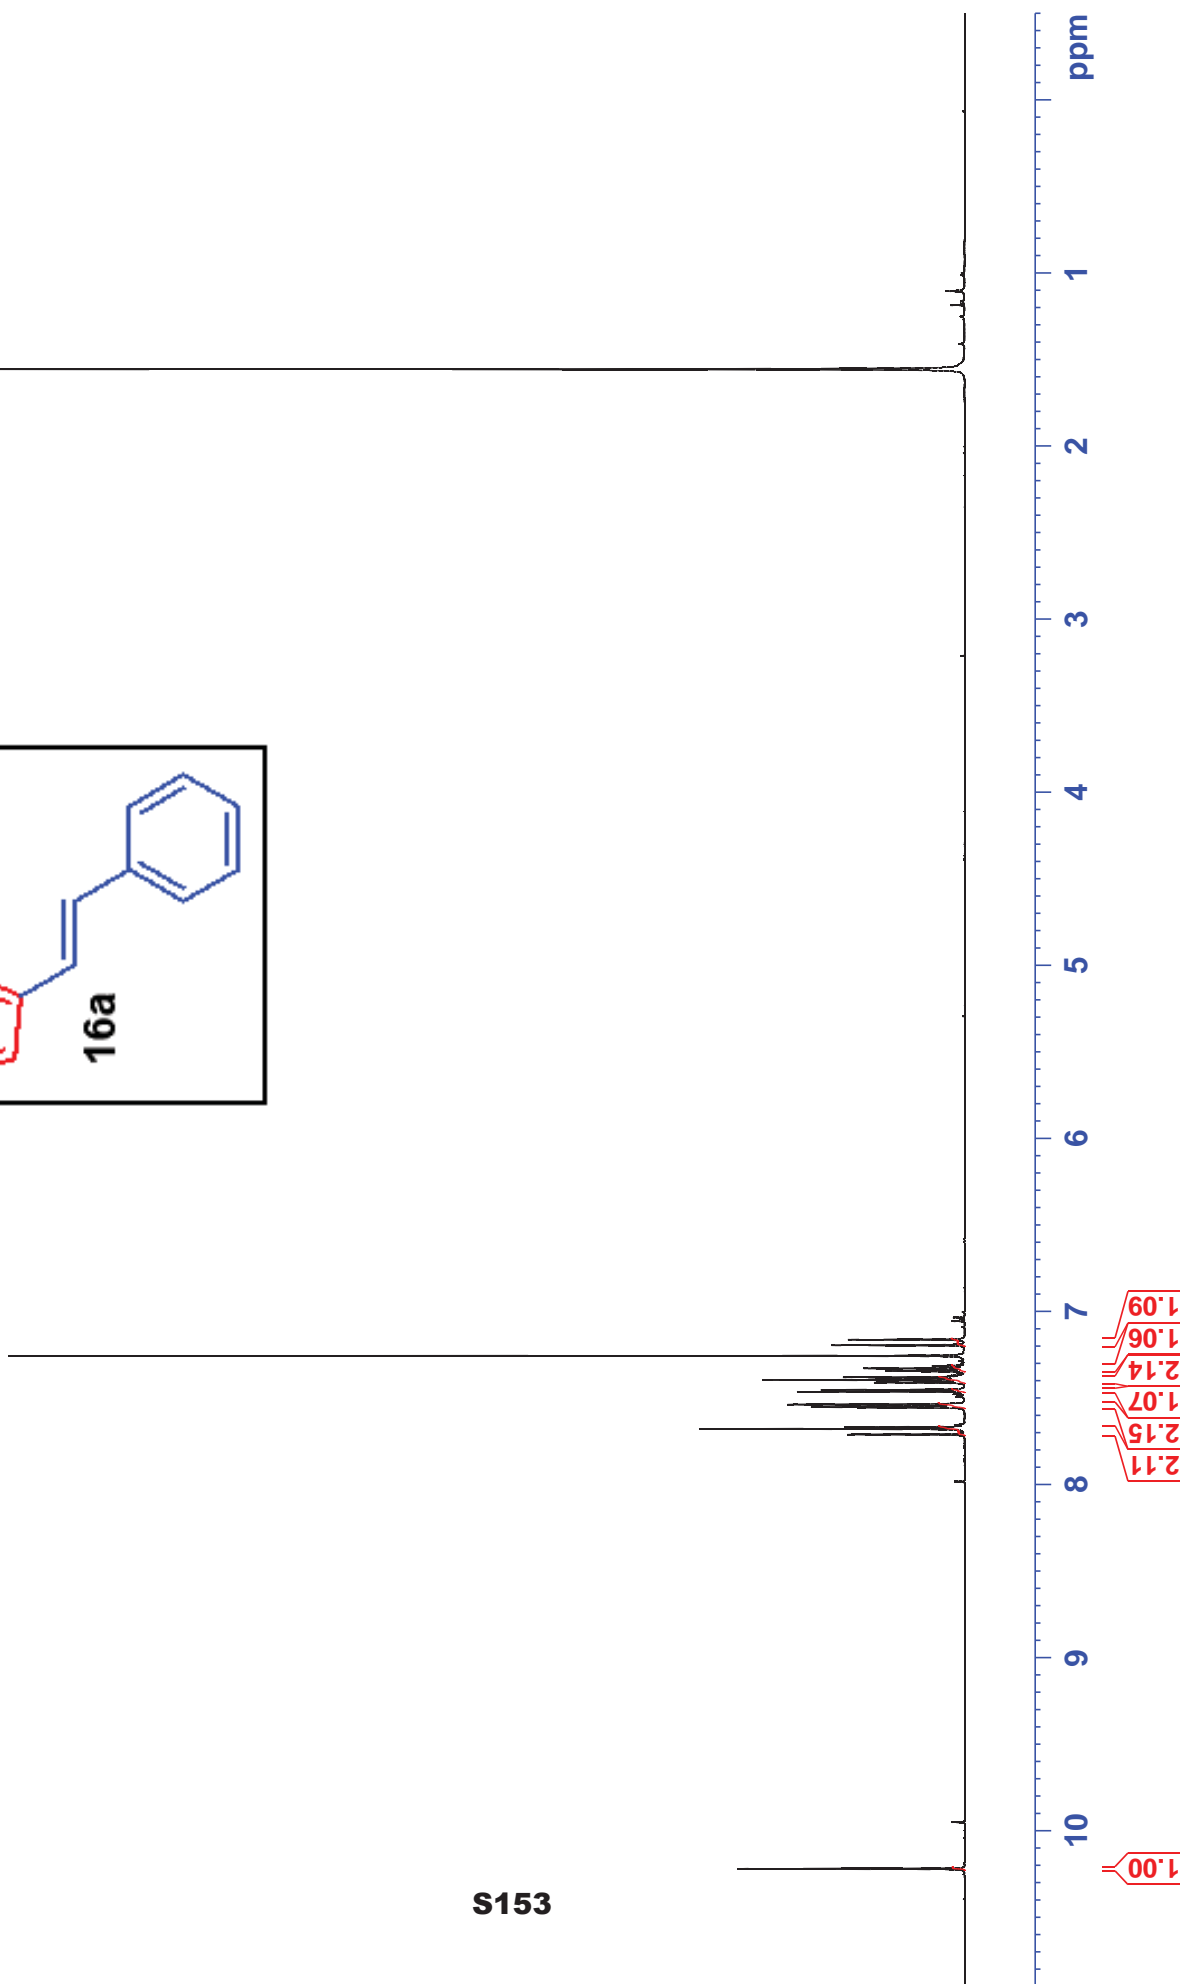

MOI-FGF23-A<sub>5</sub>-77(5)  
RCHO of MD-3-A59

146.88  
137.67  
136.40  
134.89  
134.52  
129.05  
128.96  
127.11  
126.94  
119.46

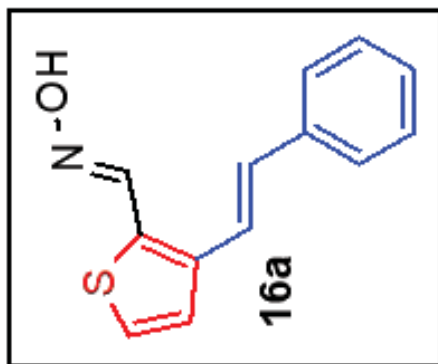

S154

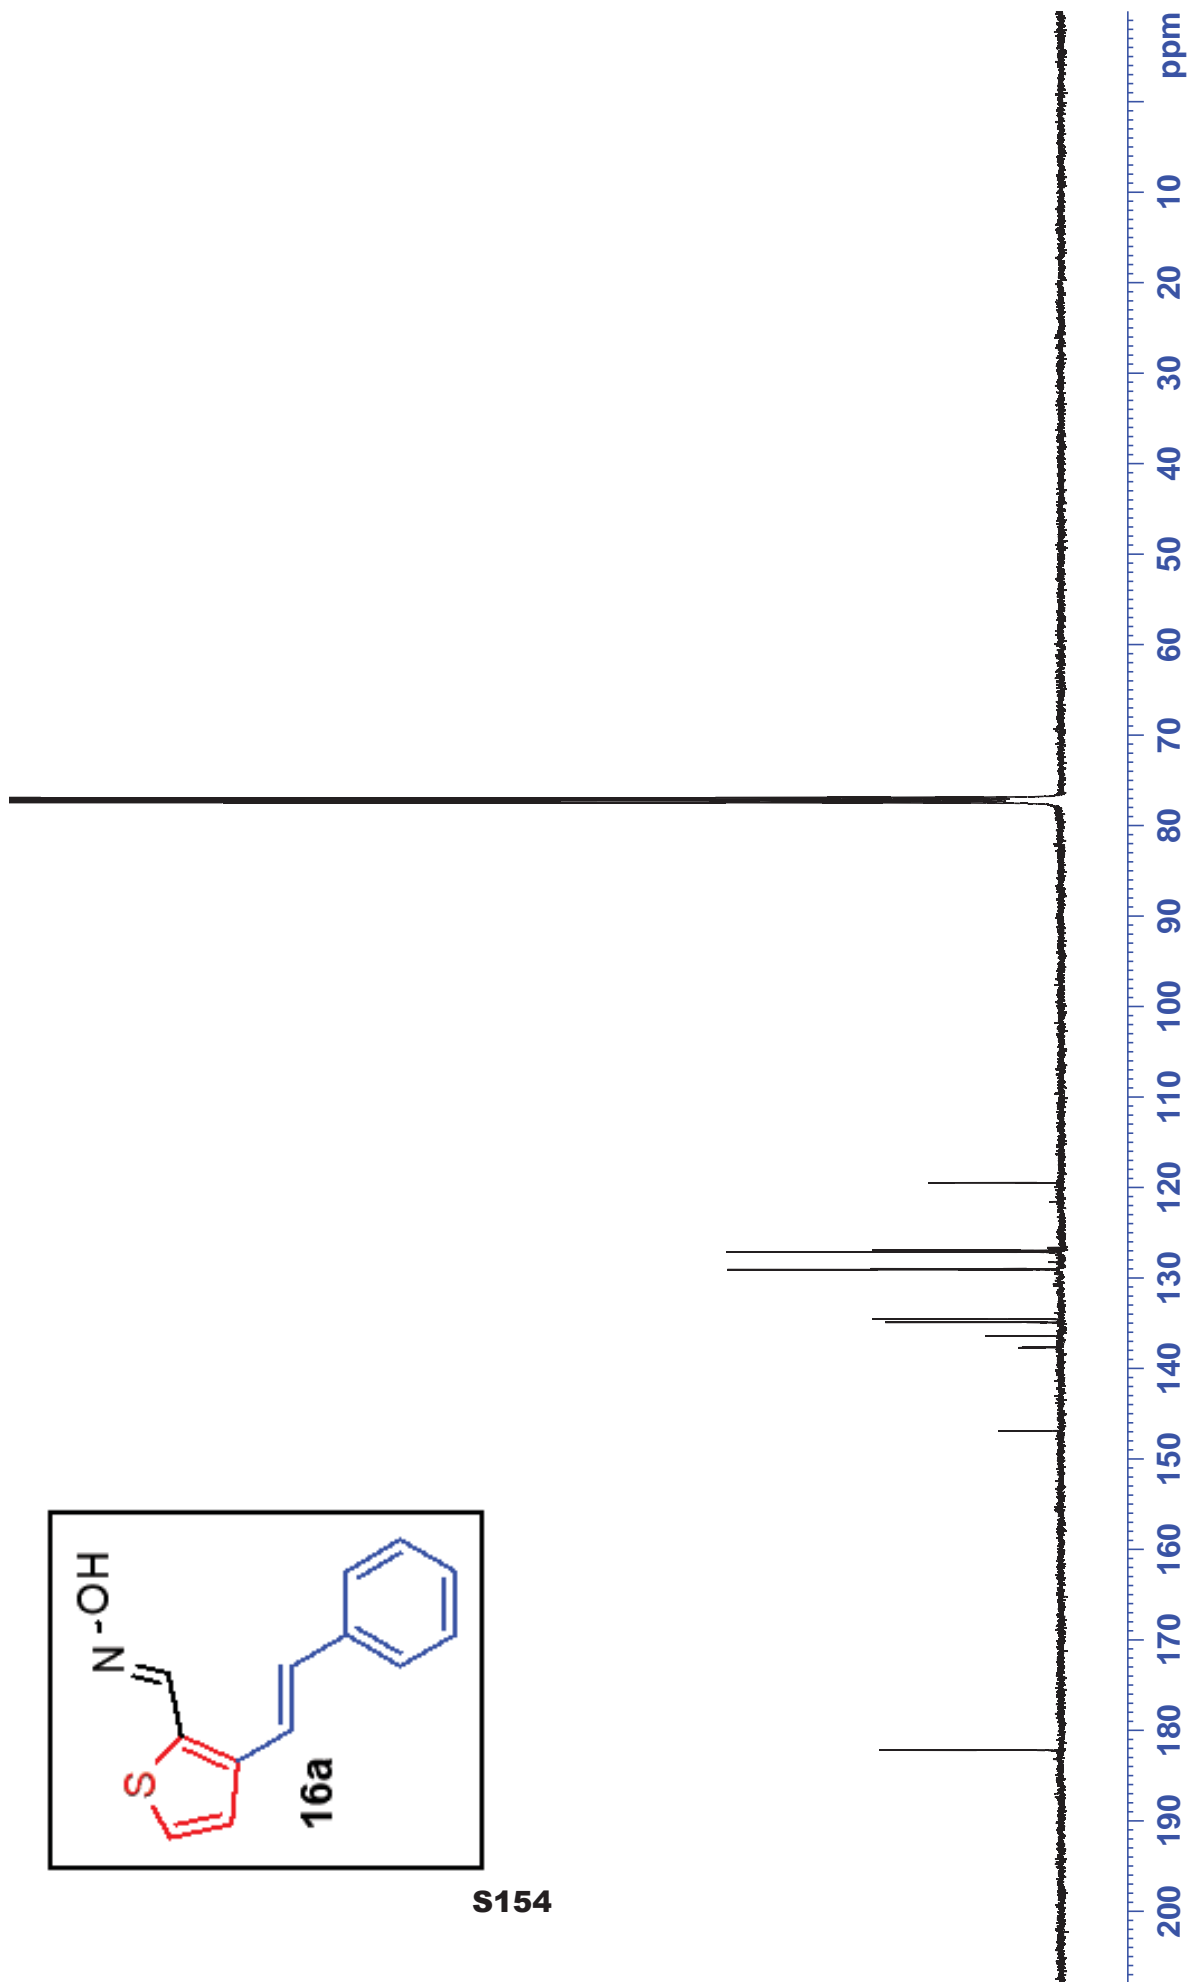

MOI-FGF23-A-129 (5)  
MD-3-A67

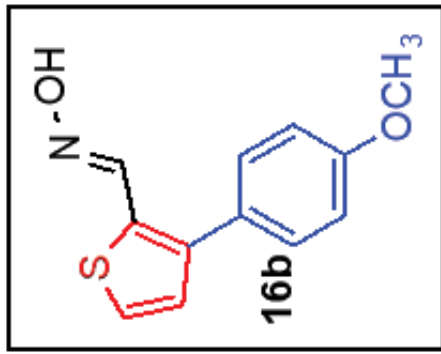

S155

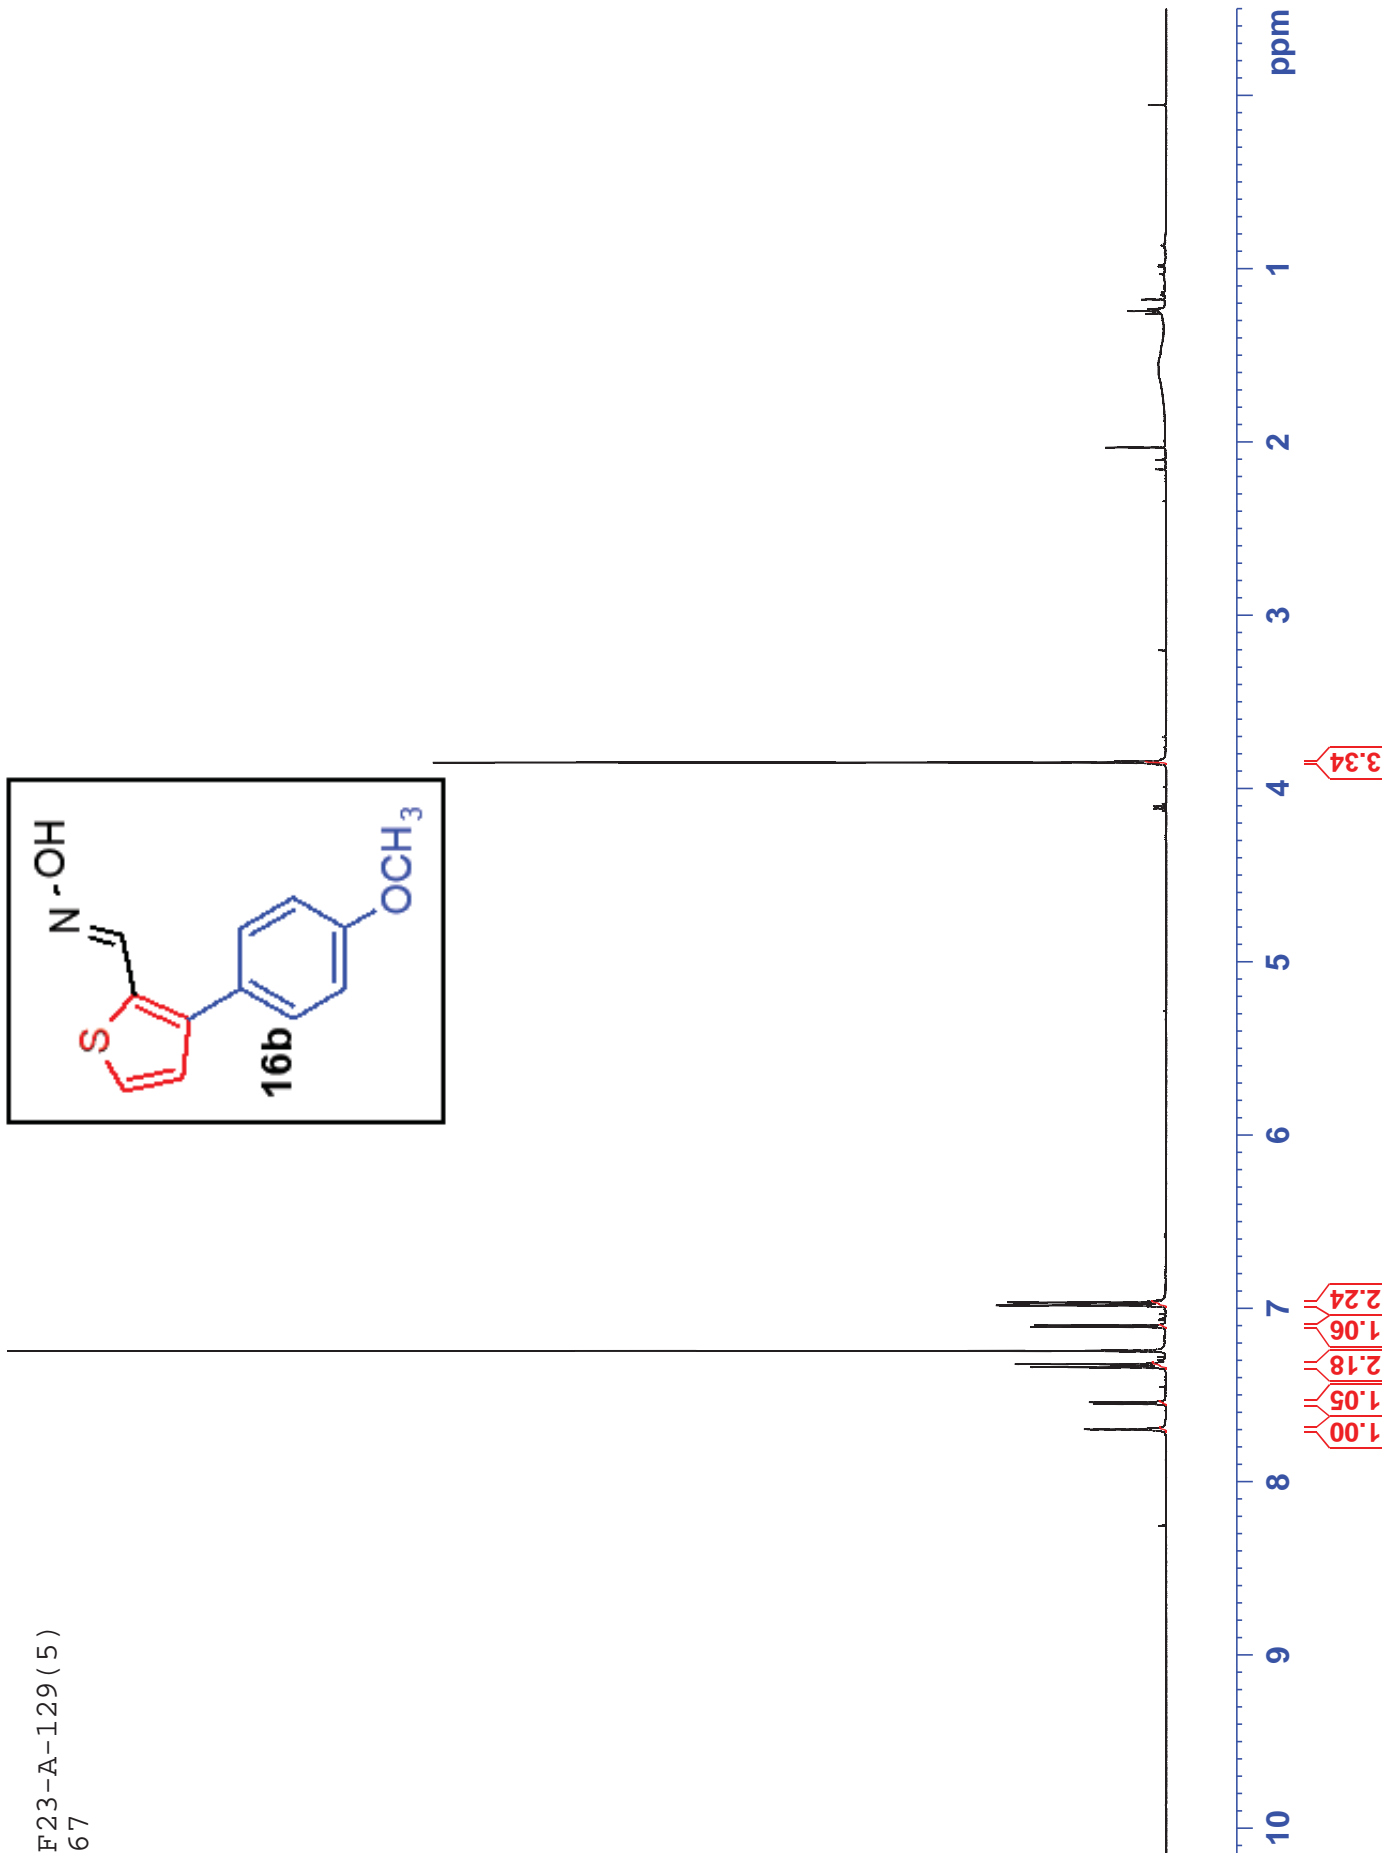

MOI-FGF23-A-129(5)  
MD-3-A67

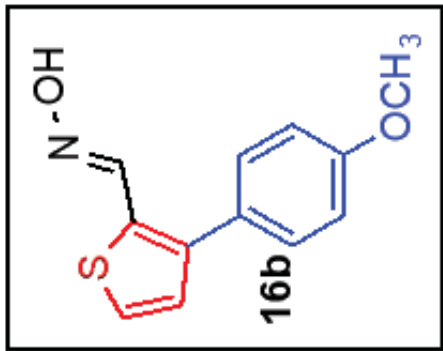

159.60  
146.08  
141.32  
130.85  
130.38  
128.53  
128.15  
124.87  
114.23  
55.52

S156

210 200 190 180 170 160 150 140 130 120 110 100 90 80 70 60 50 40 30 20 10 0 ppm



Sample: JWC-FGF23-A-71

Peak Tube Volume: Max.

All Wavelength (orange): 200nm - 360nm

4x Column: 2

Non-Peak Tube Volume: Max.

Peak Width: 30 sec

RediSep Column: Silica 4g

Loading Type: Solid

Threshold: 0.20 AU

Flow Rate: 18 ml/min

Wavelength 1 (red): 254nm

Peak Width: 30 sec

Equilibration Volume: 33.6 ml

Threshold: 0.20 AU

Initial Waste: 0.0 ml

Wavelength 2 (purple): 280nm

Air Purge: 10.0 min

Solvent: A1 hexane

Solvent: B2 methanol

Run Notes:

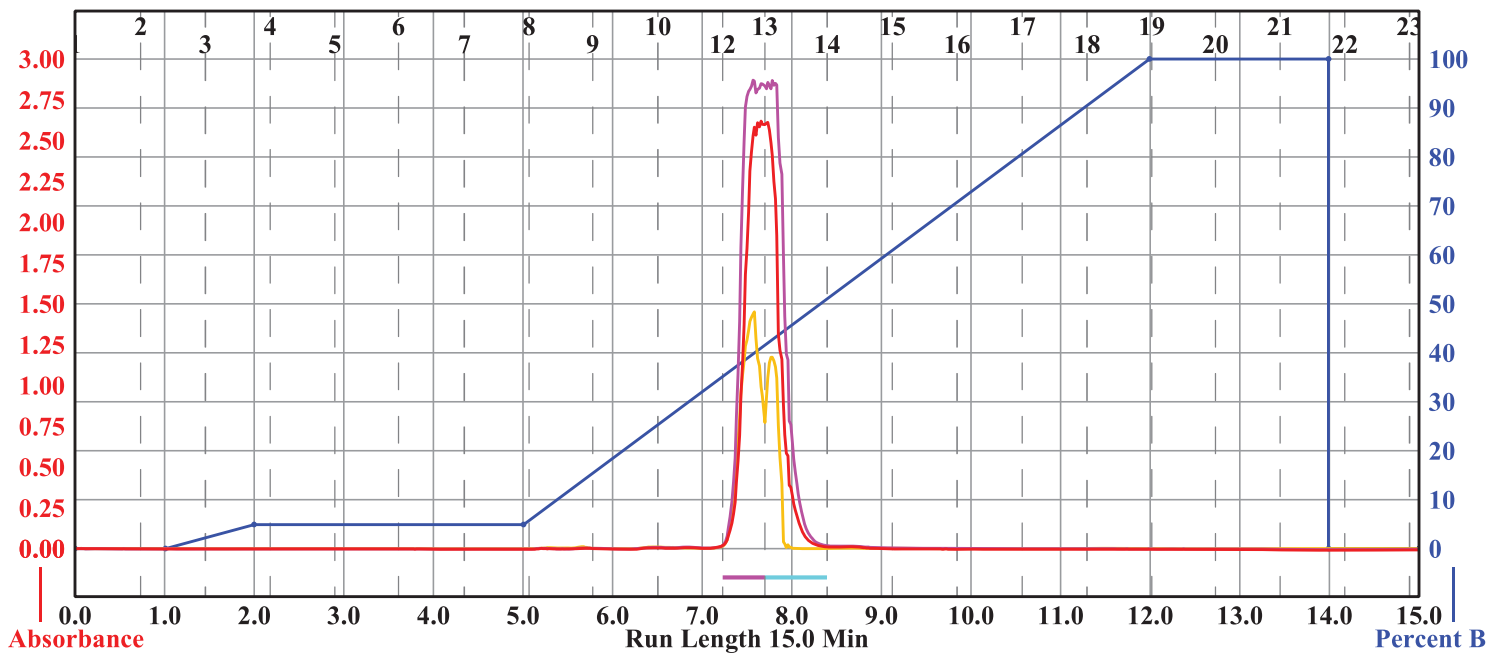

| Rack A |      |      |      |      | Peak # | Start Tube | End Tube |
|--------|------|------|------|------|--------|------------|----------|
| (71)   | (72) | (73) | (74) | (75) | 1      | A:12       | A:12     |
| (70)   | (69) | (68) | (67) | (66) | 2      | A:13       | A:13     |
| (61)   | (62) | (63) | (64) | (65) |        |            |          |
| (60)   | (59) | (58) | (57) | (56) |        |            |          |
| (51)   | (52) | (53) | (54) | (55) |        |            |          |
| (50)   | (49) | (48) | (47) | (46) |        |            |          |
| (41)   | (42) | (43) | (44) | (45) |        |            |          |
| (40)   | (39) | (38) | (37) | (36) |        |            |          |
| (31)   | (32) | (33) | (34) | (35) |        |            |          |
| (30)   | (29) | (28) | (27) | (26) |        |            |          |
| (21)   | (22) | (23) | (24) | (25) |        |            |          |
| (20)   | (19) | (18) | (17) | (16) |        |            |          |
| (11)   | (12) | (13) | (14) | (15) |        |            |          |
| (10)   | (9)  | (8)  | (7)  | (6)  |        |            |          |
| (1)    | (2)  | (3)  | (4)  | (5)  |        |            |          |

  

| Duration | %B    | Solvent A | Solvent B   |
|----------|-------|-----------|-------------|
| 0.0      | 0.0   | A1 hexane | B2 methanol |
| 1.0      | 0.0   | A1 hexane | B2 methanol |
| 1.0      | 4.9   | A1 hexane | B2 methanol |
| 3.0      | 4.9   | A1 hexane | B2 methanol |
| 7.0      | 100.0 | A1 hexane | B2 methanol |
| 2.0      | 100.0 | A1 hexane | B2 methanol |
| 0.0      | 0.0   | A1 hexane | B2 methanol |
| 1.0      | 0.0   | A1 hexane | B2 methanol |
| 0.0      | 0.0   | A1 hexane | B2 methanol |

16 mm x 100 mm Tubes

Sample: JWC-FGF23-A-73

Peak Tube Volume: Max.

All Wavelength (orange): 200nm - 360nm

4x Column: 2

Non-Peak Tube Volume: Max.

Peak Width: 30 sec

RediSep Column: Silica 4g

Loading Type: Solid

Threshold: 0.20 AU

Flow Rate: 18 ml/min

Wavelength 1 (red): 254nm

Peak Width: 30 sec

Equilibration Volume: 33.6 ml

Threshold: 0.20 AU

Initial Waste: 0.0 ml

Wavelength 2 (purple): 280nm

Air Purge: 9.5 min

Solvent: A1 hexane

Solvent: B2 methanol

Run Notes:

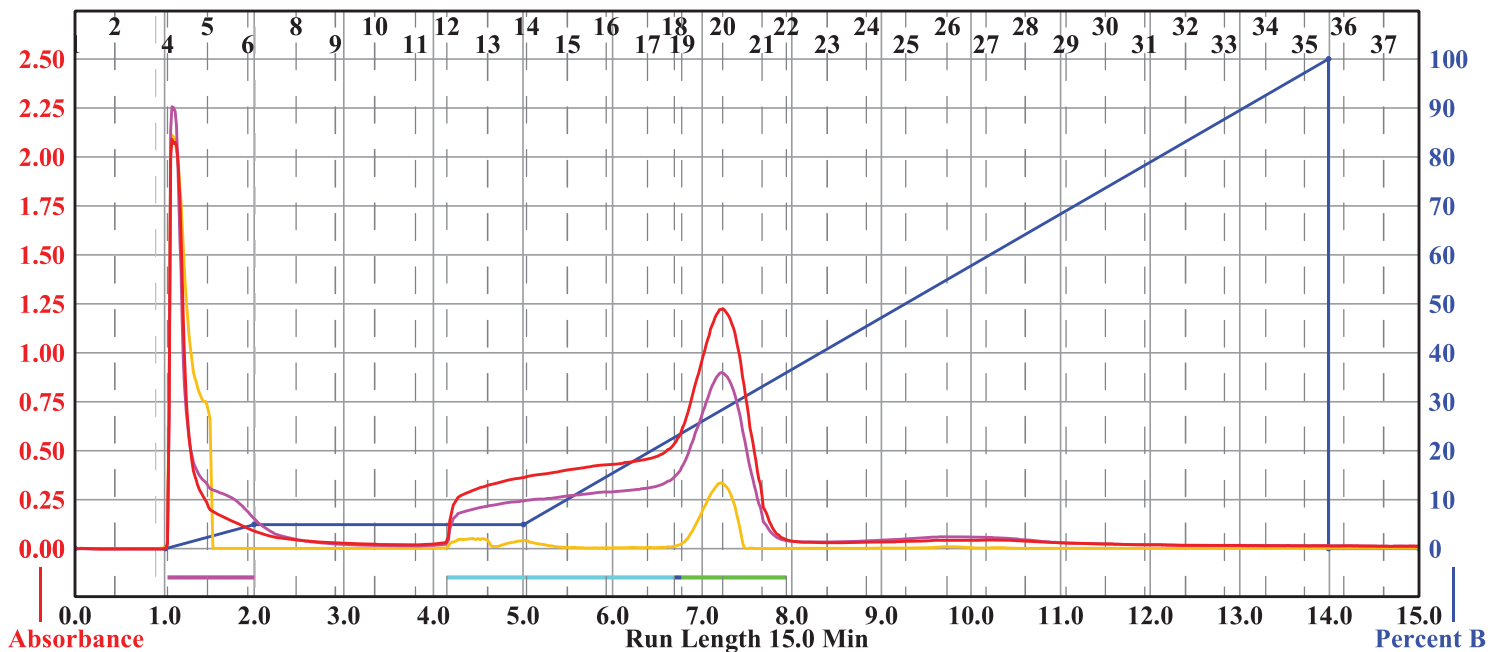

| Rack A |     |     |     |     |     | Peak # | Start Tube | End Tube |
|--------|-----|-----|-----|-----|-----|--------|------------|----------|
| 108    | 107 | 106 | 105 | 104 | 103 | 1      | A:4        | A:6      |
| 97     | 98  | 99  | 100 | 101 | 102 | 2      | A:12       | A:17     |
| 96     | 95  | 94  | 93  | 92  | 91  | 3      | A:18       | A:18     |
| 85     | 86  | 87  | 88  | 89  | 90  | 4      | A:19       | A:21     |
| 84     | 83  | 82  | 81  | 80  | 79  |        |            |          |
| 73     | 74  | 75  | 76  | 77  | 78  |        |            |          |
| 72     | 71  | 70  | 69  | 68  | 67  |        |            |          |
| 61     | 62  | 63  | 64  | 65  | 66  |        |            |          |
| 60     | 59  | 58  | 57  | 56  | 55  |        |            |          |
| 49     | 50  | 51  | 52  | 53  | 54  |        |            |          |
| 48     | 47  | 46  | 45  | 44  | 43  |        |            |          |
| 37     | 38  | 39  | 40  | 41  | 42  |        |            |          |
| 36     | 35  | 34  | 33  | 32  | 31  |        |            |          |
| 25     | 26  | 27  | 28  | 29  | 30  |        |            |          |
| 24     | 23  | 22  | 21  | 20  | 19  |        |            |          |
| 13     | 14  | 15  | 16  | 17  | 18  |        |            |          |
| 12     | 11  | 10  | 9   | 8   | 7   |        |            |          |
| 1      | 2   | 3   | 4   | 5   | 6   |        |            |          |

  

| Duration | %B    | Solvent A | Solvent B   |
|----------|-------|-----------|-------------|
| 0.0      | 0.0   | A1 hexane | B2 methanol |
| 1.0      | 0.0   | A1 hexane | B2 methanol |
| 1.0      | 4.9   | A1 hexane | B2 methanol |
| 3.0      | 4.9   | A1 hexane | B2 methanol |
| 9.0      | 100.0 | A1 hexane | B2 methanol |
| 0.0      | 0.0   | A1 hexane | B2 methanol |
| 1.0      | 0.0   | A1 hexane | B2 methanol |

13 mm x 100 mm Tubes

Sample: JWC-FGF23-A-75

Peak Tube Volume: Max.

All Wavelength (orange): 200nm - 360nm

4x Column: 2

Non-Peak Tube Volume: Max.

Peak Width: 30 sec

RediSep Column: Silica 4g

Loading Type: Solid

Threshold: 0.20 AU

Flow Rate: 18 ml/min

Wavelength 1 (red): 254nm

Peak Width: 30 sec

Equilibration Volume: 33.6 ml

Threshold: 0.20 AU

Initial Waste: 0.0 ml

Wavelength 2 (purple): 280nm

Air Purge: 10.0 min

Solvent: A1 hexane

Solvent: B2 methanol

Run Notes:

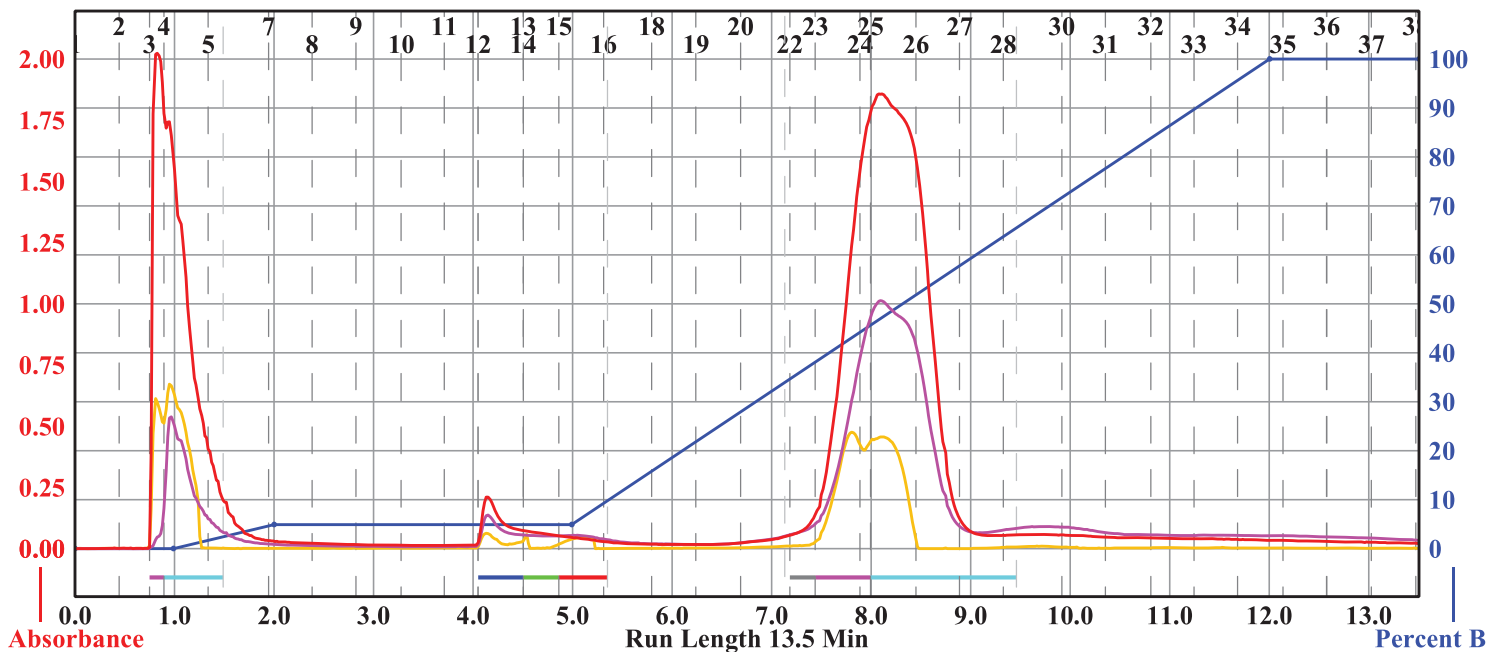

| Rack A |     |     |     |     |     | Peak # | Start Tube | End Tube |
|--------|-----|-----|-----|-----|-----|--------|------------|----------|
| 108    | 107 | 106 | 105 | 104 | 103 | 1      | A:3        | A:3      |
| 97     | 98  | 99  | 100 | 101 | 102 | 2      | A:4        | A:5      |
| 96     | 95  | 94  | 93  | 92  | 91  | 3      | A:12       | A:13     |
| 85     | 86  | 87  | 88  | 89  | 90  | 4      | A:14       | A:14     |
| 84     | 83  | 82  | 81  | 80  | 79  | 5      | A:15       | A:16     |
| 73     | 74  | 75  | 76  | 77  | 78  | 6      | A:22       | A:22     |
| 72     | 71  | 70  | 69  | 68  | 67  | 7      | A:23       | A:24     |
| 61     | 62  | 63  | 64  | 65  | 66  | 8      | A:25       | A:28     |
| 60     | 59  | 58  | 57  | 56  | 55  |        |            |          |
| 49     | 50  | 51  | 52  | 53  | 54  |        |            |          |
| 48     | 47  | 46  | 45  | 44  | 43  |        |            |          |
| 37     | 38  | 39  | 40  | 41  | 42  |        |            |          |
| 36     | 35  | 34  | 33  | 32  | 31  |        |            |          |
| 25     | 26  | 27  | 28  | 29  | 30  |        |            |          |
| 24     | 23  | 22  | 21  | 20  | 19  |        |            |          |
| 13     | 14  | 15  | 16  | 17  | 18  |        |            |          |
| 12     | 11  | 10  | 9   | 8   | 7   |        |            |          |
| 1      | 2   | 3   | 4   | 5   | 6   |        |            |          |

  

| Duration | %B    | Solvent A | Solvent B   |
|----------|-------|-----------|-------------|
| 0.0      | 0.0   | A1 hexane | B2 methanol |
| 1.0      | 0.0   | A1 hexane | B2 methanol |
| 1.0      | 4.9   | A1 hexane | B2 methanol |
| 3.0      | 4.9   | A1 hexane | B2 methanol |
| 7.0      | 100.0 | A1 hexane | B2 methanol |
| 1.5      | 100.0 | A1 hexane | B2 methanol |

13 mm x 100 mm Tubes

Sample: JWC-B-155

Peak Tube Volume: Max.

All Wavelength (orange): 200nm - 360nm

4x Column: 1

Non-Peak Tube Volume: Max.

Peak Width: 30 sec

RediSep Column: Silica 4g

Loading Type: Solid

Threshold: 0.20 AU

Flow Rate: 18 ml/min

Wavelength 1 (red): 254nm

Peak Width: 30 sec

Equilibration Volume: 33.6 ml

Threshold: 0.20 AU

Initial Waste: 0.0 ml

Wavelength 2 (purple): 280nm

Air Purge: 10.0 min

Solvent: A1 hexane

Solvent: B2 methanol

Run Notes:

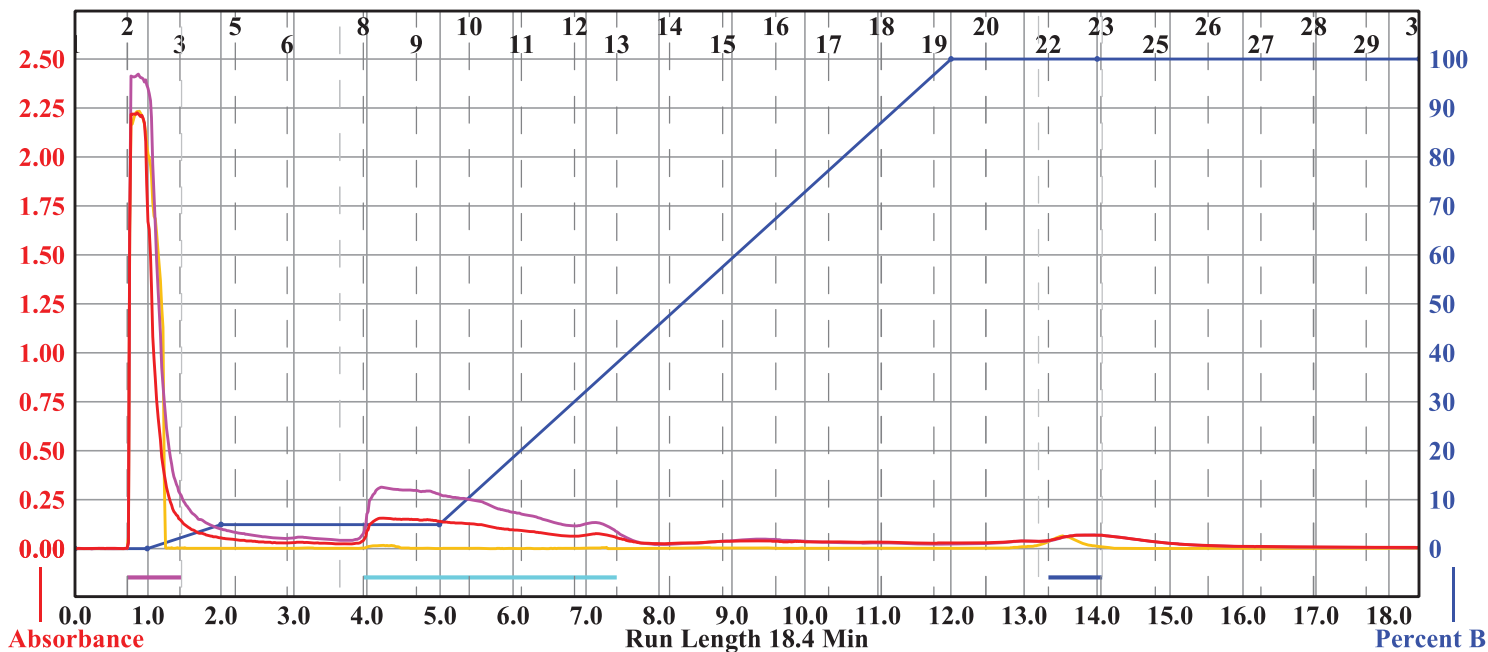

| Rack A |      |      |      |      | Peak # | Start Tube | End Tube |
|--------|------|------|------|------|--------|------------|----------|
| (71)   | (72) | (73) | (74) | (75) | 1      | A:2        | A:3      |
| (70)   | (69) | (68) | (67) | (66) | 2      | A:8        | A:12     |
| (61)   | (62) | (63) | (64) | (65) | 3      | A:22       | A:23     |
| (60)   | (59) | (58) | (57) | (56) |        |            |          |
| (51)   | (52) | (53) | (54) | (55) |        |            |          |
| (50)   | (49) | (48) | (47) | (46) |        |            |          |
| (41)   | (42) | (43) | (44) | (45) |        |            |          |
| (40)   | (39) | (38) | (37) | (36) |        |            |          |
| (31)   | (32) | (33) | (34) | (35) |        |            |          |
| (30)   | (29) | (28) | (27) | (26) |        |            |          |
| (21)   | (22) | (23) | (24) | (25) |        |            |          |
| (20)   | (19) | (18) | (17) | (16) |        |            |          |
| (11)   | (12) | (13) | (14) | (15) |        |            |          |
| (10)   | (9)  | (8)  | (7)  | (6)  |        |            |          |
| (1)    | (2)  | (3)  | (4)  | (5)  |        |            |          |

  

| Duration | %B    | Solvent A | Solvent B   |
|----------|-------|-----------|-------------|
| 0.0      | 0.0   | A1 hexane | B2 methanol |
| 1.0      | 0.0   | A1 hexane | B2 methanol |
| 1.0      | 4.9   | A1 hexane | B2 methanol |
| 3.0      | 4.9   | A1 hexane | B2 methanol |
| 7.0      | 100.0 | A1 hexane | B2 methanol |
| 2.0      | 100.0 | A1 hexane | B2 methanol |
| 4.4      | 100.0 | A1 hexane | B2 methanol |

16 mm x 100 mm Tubes

Sample: RPD-FGF23-A-17

Peak Tube Volume: Max.

All Wavelength (orange): 200nm - 360nm

4x Column: 2

Non-Peak Tube Volume: Max.

Peak Width: 30 sec

RediSep Column: Silica 4g

Loading Type: Solid

Threshold: 0.20 AU

Flow Rate: 18 ml/min

Wavelength 1 (red): 254nm

Peak Width: 30 sec

Equilibration Volume: 33.6 ml

Threshold: 0.20 AU

Initial Waste: 0.0 ml

Wavelength 2 (purple): 280nm

Air Purge: 10.0 min

Solvent: A2 dichloromethane

Solvent: B2 methanol

Run Notes:

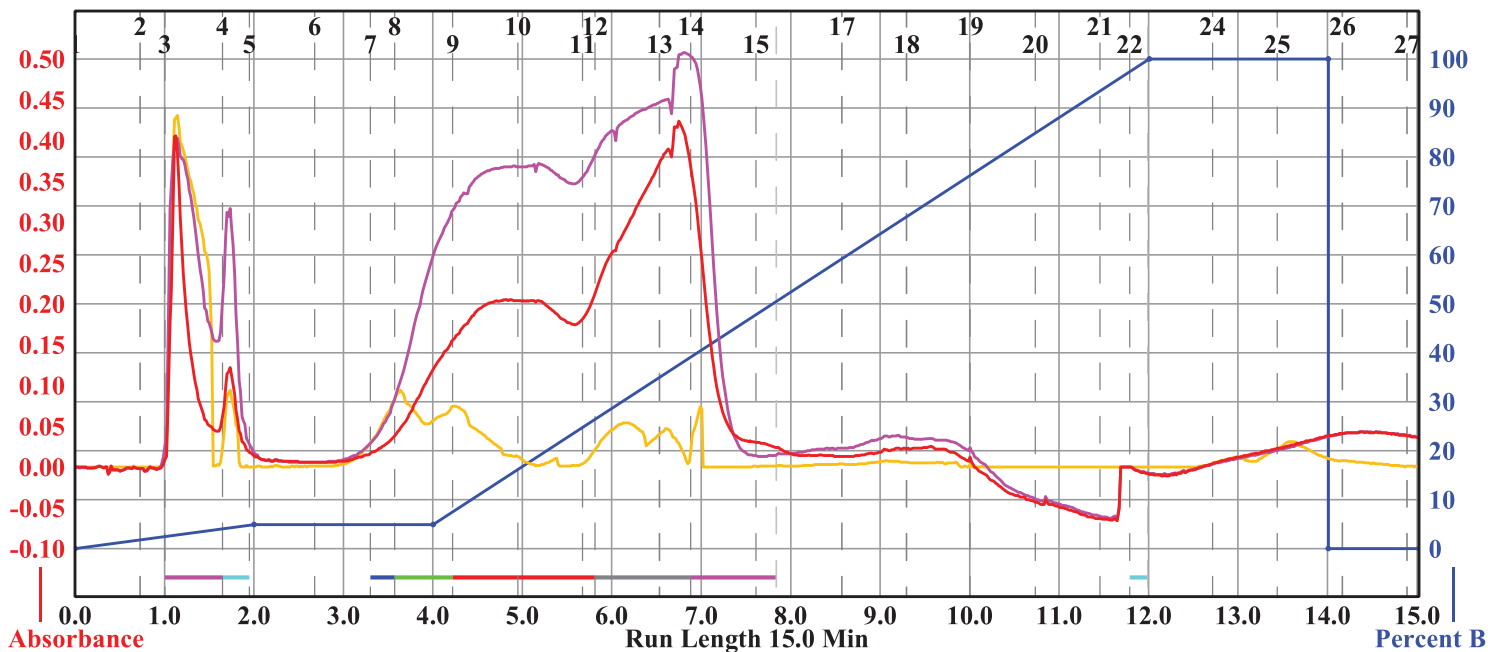

| Rack A |      |      |      |      | Peak #   | Start Tube | End Tube         |             |
|--------|------|------|------|------|----------|------------|------------------|-------------|
| (71)   | (72) | (73) | (74) | (75) | 1        | A:3        | A:3              |             |
| (70)   | (69) | (68) | (67) | (66) | 2        | A:4        | A:4              |             |
| (61)   | (62) | (63) | (64) | (65) | 3        | A:7        | A:7              |             |
| (60)   | (59) | (58) | (57) | (56) | 4        | A:8        | A:8              |             |
| (51)   | (52) | (53) | (54) | (55) | 5        | A:9        | A:11             |             |
| (50)   | (49) | (48) | (47) | (46) | 6        | A:12       | A:13             |             |
| (41)   | (42) | (43) | (44) | (45) | 7        | A:14       | A:15             |             |
| (40)   | (39) | (38) | (37) | (36) | 8        | A:22       | A:22             |             |
| (31)   | (32) | (33) | (34) | (35) | Duration | %B         | Solvent A        | Solvent B   |
| (30)   | (29) | (28) | (27) | (26) | 0.0      | 0.0        | A2 dichlorometha | B2 methanol |
| (21)   | (22) | (23) | (24) | (25) | 2.0      | 4.9        | A2 dichlorometha | B2 methanol |
| (20)   | (19) | (18) | (17) | (16) | 2.0      | 4.9        | A2 dichlorometha | B2 methanol |
| (11)   | (12) | (13) | (14) | (15) | 8.0      | 100.0      | A2 dichlorometha | B2 methanol |
| (10)   | (9)  | (8)  | (7)  | (6)  | 2.0      | 100.0      | A2 dichlorometha | B2 methanol |
| (1)    | (2)  | (3)  | (4)  | (5)  | 0.0      | 0.0        | A2 dichlorometha | B2 methanol |
|        |      |      |      |      | 1.0      | 0.0        | A2 dichlorometha | B2 methanol |

16 mm x 100 mm Tubes

Sample: JWC-B-153

Peak Tube Volume: Max.

All Wavelength (orange): 200nm - 360nm

4x Column: 2

Non-Peak Tube Volume: Max.

Peak Width: 30 sec

RediSep Column: Silica 4g

Loading Type: Solid

Threshold: 0.20 AU

Flow Rate: 18 ml/min

Wavelength 1 (red): 254nm

Peak Width: 30 sec

Equilibration Volume: 33.6 ml

Threshold: 0.20 AU

Initial Waste: 0.0 ml

Wavelength 2 (purple): 280nm

Air Purge: 10.0 min

Solvent: A1 hexane

Solvent: B2 methanol

Run Notes:

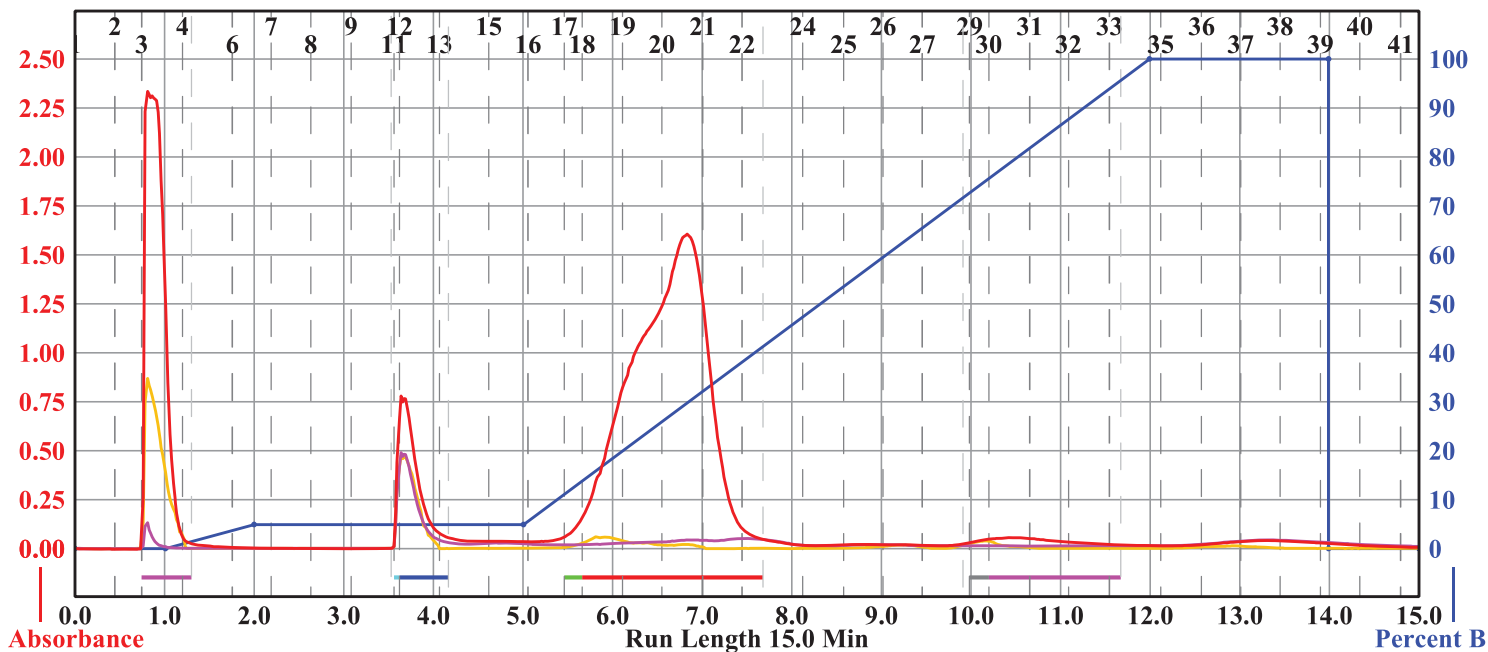

| Rack A |     |     |     |     |     |
|--------|-----|-----|-----|-----|-----|
| 108    | 107 | 106 | 105 | 104 | 103 |
| 97     | 98  | 99  | 100 | 101 | 102 |
| 96     | 95  | 94  | 93  | 92  | 91  |
| 85     | 86  | 87  | 88  | 89  | 90  |
| 84     | 83  | 82  | 81  | 80  | 79  |
| 73     | 74  | 75  | 76  | 77  | 78  |
| 72     | 71  | 70  | 69  | 68  | 67  |
| 61     | 62  | 63  | 64  | 65  | 66  |
| 60     | 59  | 58  | 57  | 56  | 55  |
| 49     | 50  | 51  | 52  | 53  | 54  |
| 48     | 47  | 46  | 45  | 44  | 43  |
| 37     | 38  | 39  | 40  | 41  | 42  |
| 36     | 35  | 34  | 33  | 32  | 31  |
| 25     | 26  | 27  | 28  | 29  | 30  |
| 24     | 23  | 22  | 21  | 20  | 19  |
| 13     | 14  | 15  | 16  | 17  | 18  |
| 12     | 11  | 10  | 9   | 8   | 7   |
| 1      | 2   | 3   | 4   | 5   | 6   |

| Peak # | Start Tube | End Tube |
|--------|------------|----------|
| 1      | A:3        | A:4      |
| 2      | A:11       | A:11     |
| 3      | A:12       | A:13     |
| 4      | A:17       | A:17     |
| 5      | A:18       | A:22     |
| 6      | A:29       | A:29     |
| 7      | A:30       | A:33     |

| Duration | %B    | Solvent A | Solvent B   |
|----------|-------|-----------|-------------|
| 0.0      | 0.0   | A1 hexane | B2 methanol |
| 1.0      | 0.0   | A1 hexane | B2 methanol |
| 1.0      | 4.9   | A1 hexane | B2 methanol |
| 3.0      | 4.9   | A1 hexane | B2 methanol |
| 7.0      | 100.0 | A1 hexane | B2 methanol |
| 2.0      | 100.0 | A1 hexane | B2 methanol |
| 0.0      | 0.0   | A1 hexane | B2 methanol |
| 1.0      | 0.0   | A1 hexane | B2 methanol |
| 0.0      | 0.0   | A1 hexane | B2 methanol |

13 mm x 100 mm Tubes

Sample: RPD-FGF23-A-129

Peak Tube Volume: Max.

All Wavelength (orange): 200nm - 360nm

4x Column: 3

Non-Peak Tube Volume: Max.

Peak Width: 1 min

RediSep Column: Silica 12g

Loading Type: Solid

Threshold: 0.20 AU

Flow Rate: 30 ml/min

Wavelength 1 (red): 254nm

Peak Width: 1 min

Equilibration Volume: 100.8 ml

Threshold: 0.20 AU

Initial Waste: 0.0 ml

Wavelength 2 (purple): 280nm

Air Purge: 5.0 min

Solvent: A1 hexane

Solvent: B2 methanol

Run Notes:

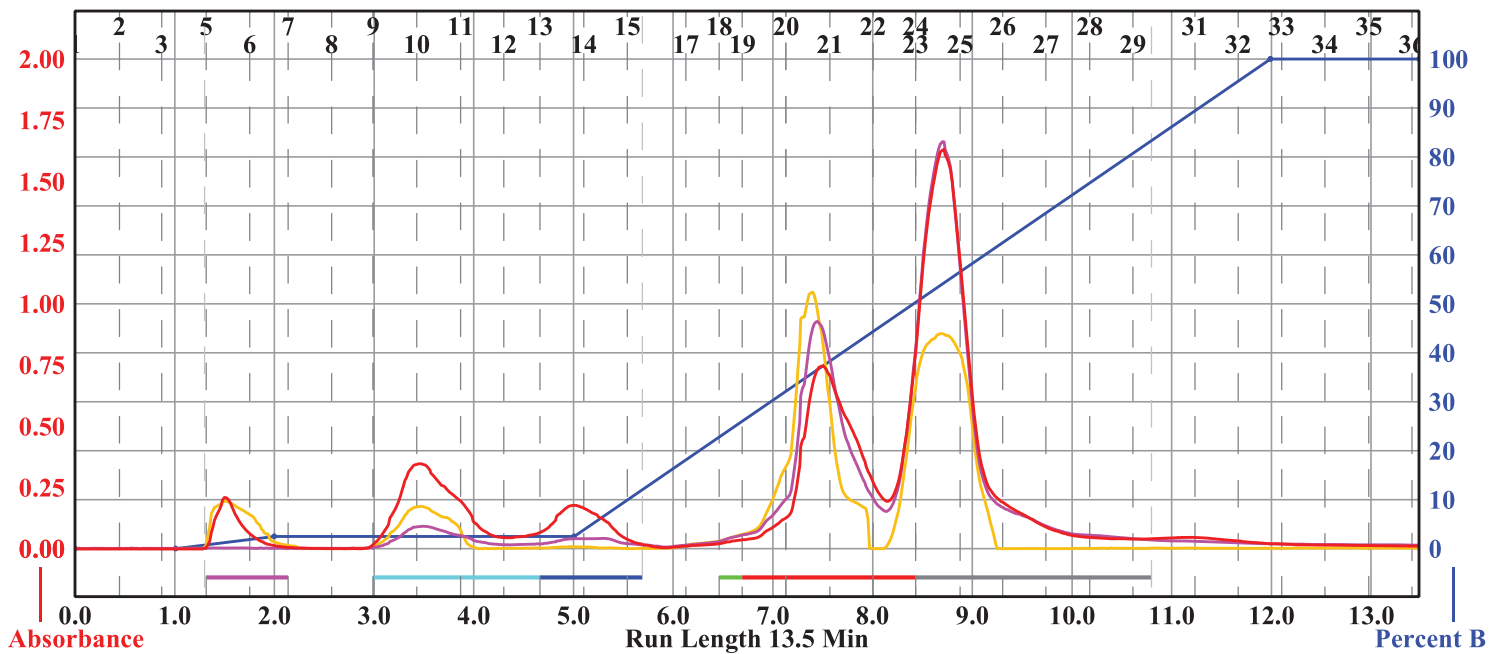

| Rack A |      |      |      |      | Peak # | Start Tube | End Tube |
|--------|------|------|------|------|--------|------------|----------|
| (71)   | (72) | (73) | (74) | (75) | 1      | A:5        | A:6      |
| (70)   | (69) | (68) | (67) | (66) | 2      | A:9        | A:12     |
| (61)   | (62) | (63) | (64) | (65) | 3      | A:13       | A:15     |
| (60)   | (59) | (58) | (57) | (56) | 4      | A:18       | A:18     |
| (51)   | (52) | (53) | (54) | (55) | 5      | A:19       | A:23     |
| (50)   | (49) | (48) | (47) | (46) | 6      | A:24       | A:29     |
| (41)   | (42) | (43) | (44) | (45) |        |            |          |
| (40)   | (39) | (38) | (37) | (36) |        |            |          |
| (31)   | (32) | (33) | (34) | (35) |        |            |          |
| (30)   | (29) | (28) | (27) | (26) |        |            |          |
| (21)   | (22) | (23) | (24) | (25) |        |            |          |
| (20)   | (19) | (18) | (17) | (16) |        |            |          |
| (11)   | (12) | (13) | (14) | (15) |        |            |          |
| (10)   | (9)  | (8)  | (7)  | (6)  |        |            |          |
| (1)    | (2)  | (3)  | (4)  | (5)  |        |            |          |

  

| Duration | %B    | Solvent A | Solvent B   |
|----------|-------|-----------|-------------|
| 0.0      | 0.0   | A1 hexane | B2 methanol |
| 1.0      | 0.0   | A1 hexane | B2 methanol |
| 1.0      | 2.5   | A1 hexane | B2 methanol |
| 3.0      | 2.5   | A1 hexane | B2 methanol |
| 7.0      | 100.0 | A1 hexane | B2 methanol |
| 0.0      | 100.0 | A1 hexane | B2 methanol |
| 1.5      | 100.0 | A1 hexane | B2 methanol |

16 mm x 100 mm Tubes

Sample: RPD-FGF23-A-127

Peak Tube Volume: Max.

All Wavelength (orange): 200nm - 360nm

4x Column: 2

Non-Peak Tube Volume: Max.

Peak Width: 1 min

RediSep Column: Silica 12g

Loading Type: Solid

Threshold: 0.20 AU

SN: E04150644E16E6 Lot: 2621319040Y

Wavelength 1 (red): 254nm

Peak Width: 1 min

Flow Rate: 30 ml/min

Threshold: 0.20 AU

Equilibration Volume: 100.8 ml

Wavelength 2 (purple): 280nm

Initial Waste: 0.0 ml

Air Purge: 5.0 min

Solvent: A1 hexane

Solvent: B2 methanol

Run Notes:

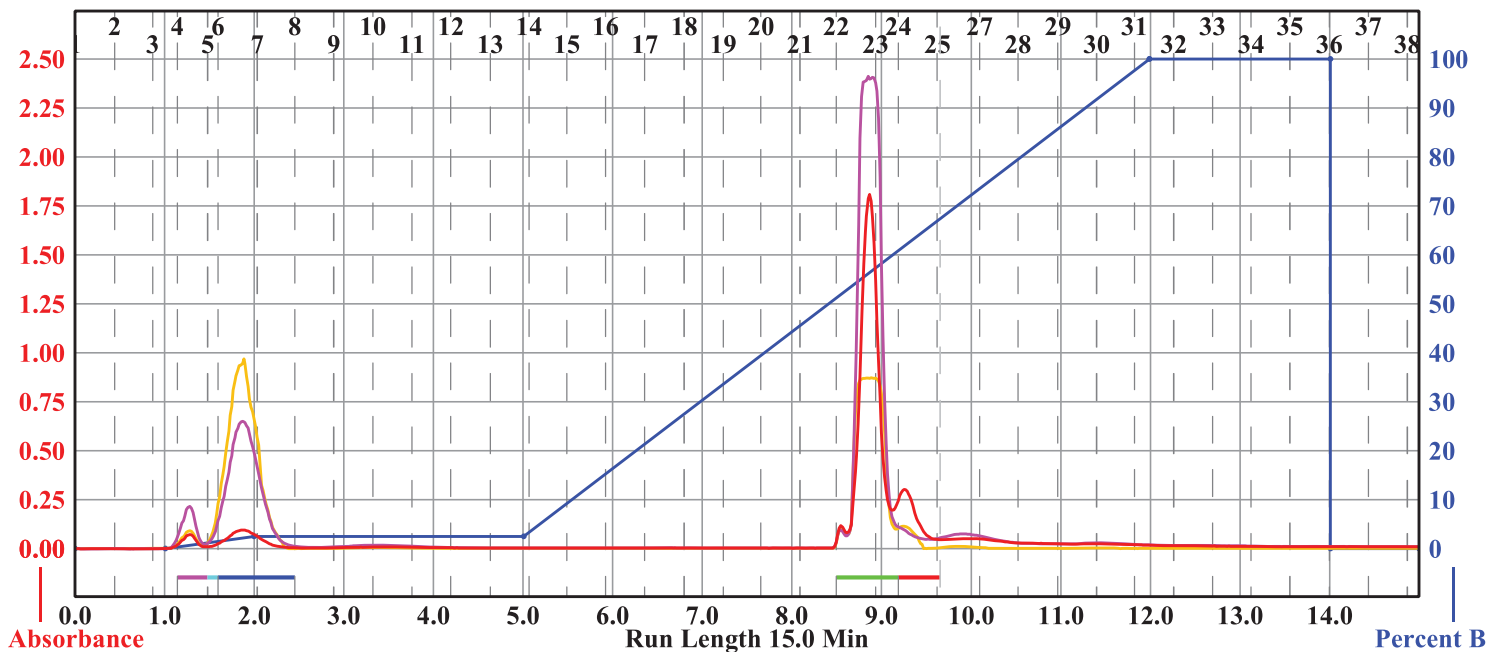

| Rack A |      |      |      |      | Peak # | Start Tube | End Tube |
|--------|------|------|------|------|--------|------------|----------|
| (71)   | (72) | (73) | (74) | (75) | 1      | A:4        | A:4      |
| (70)   | (69) | (68) | (67) | (66) | 2      | A:5        | A:5      |
| (61)   | (62) | (63) | (64) | (65) | 3      | A:6        | A:7      |
| (60)   | (59) | (58) | (57) | (56) | 4      | A:22       | A:23     |
| (51)   | (52) | (53) | (54) | (55) | 5      | A:24       | A:25     |
| (50)   | (49) | (48) | (47) | (46) |        |            |          |
| (41)   | (42) | (43) | (44) | (45) |        |            |          |
| (40)   | (39) | (38) | (37) | (36) |        |            |          |
| (31)   | (32) | (33) | (34) | (35) |        |            |          |
| (30)   | (29) | (28) | (27) | (26) |        |            |          |
| (21)   | (22) | (23) | (24) | (25) |        |            |          |
| (20)   | (19) | (18) | (17) | (16) |        |            |          |
| (11)   | (12) | (13) | (14) | (15) |        |            |          |
| (10)   | (9)  | (8)  | (7)  | (6)  |        |            |          |
| (1)    | (2)  | (3)  | (4)  | (5)  |        |            |          |

  

| Duration | %B    | Solvent A | Solvent B   |
|----------|-------|-----------|-------------|
| 0.0      | 0.0   | A1 hexane | B2 methanol |
| 1.0      | 0.0   | A1 hexane | B2 methanol |
| 1.0      | 2.5   | A1 hexane | B2 methanol |
| 3.0      | 2.5   | A1 hexane | B2 methanol |
| 7.0      | 100.0 | A1 hexane | B2 methanol |
| 0.0      | 100.0 | A1 hexane | B2 methanol |
| 2.0      | 100.0 | A1 hexane | B2 methanol |
| 0.0      | 0.0   | A1 hexane | B2 methanol |
| 1.0      | 0.0   | A1 hexane | B2 methanol |

16 mm x 100 mm Tubes



Sample: RPD-FGF23-A-81

Peak Tube Volume: Max.

All Wavelength (orange): 200nm - 360nm

4x Column: 2

Non-Peak Tube Volume: Max.

Peak Width: 1 min

RediSep Column: Silica 12g

Loading Type: Solid

Threshold: 0.20 AU

Flow Rate: 30 ml/min

Wavelength 1 (red): 254nm

Peak Width: 1 min

Equilibration Volume: 100.8 ml

Threshold: 0.20 AU

Initial Waste: 0.0 ml

Wavelength 2 (purple): 280nm

Air Purge: 3.2 min

Solvent: A1 hexane

Solvent: B2 methanol

Run Notes:

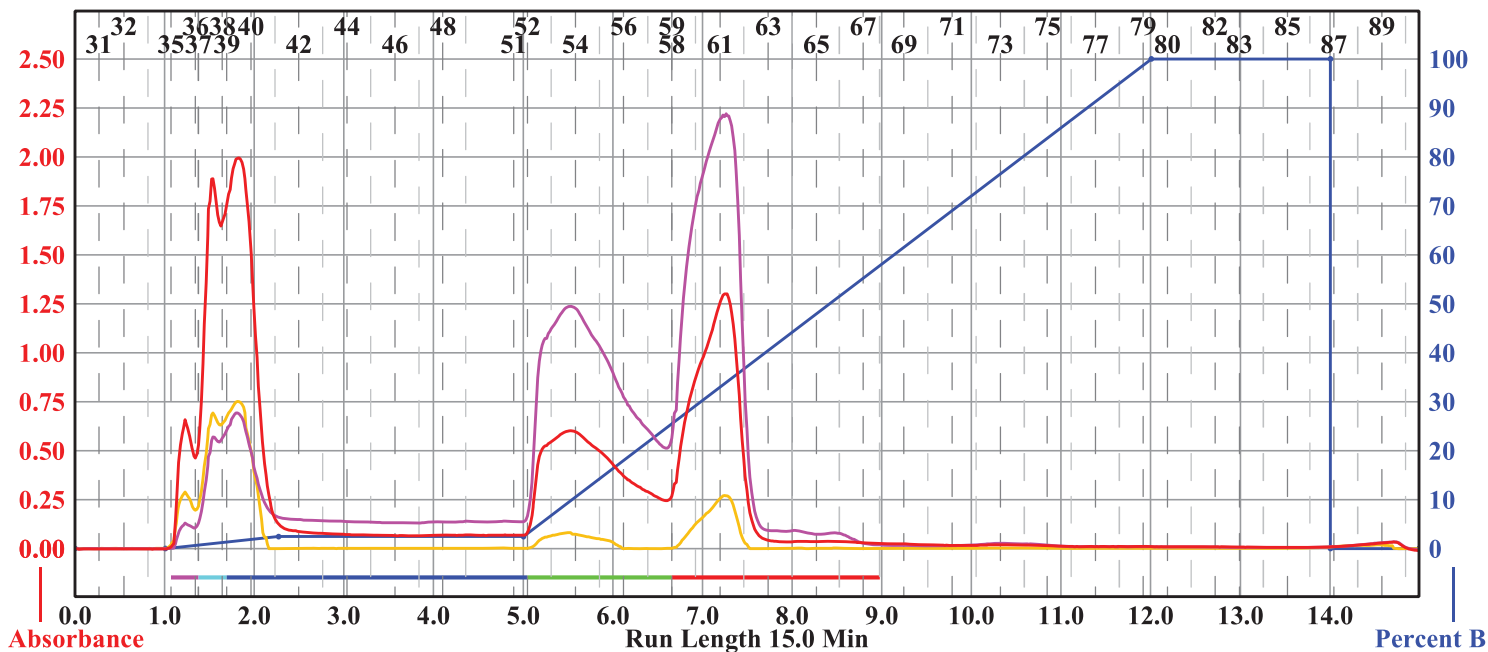

| Rack A |     |     |     |     |     |
|--------|-----|-----|-----|-----|-----|
| 108    | 107 | 106 | 105 | 104 | 103 |
| 97     | 98  | 99  | 100 | 101 | 102 |
| 96     | 95  | 94  | 93  | 92  | 91  |
| 85     | 86  | 87  | 88  | 89  | 90  |
| 84     | 83  | 82  | 81  | 80  | 79  |
| 73     | 74  | 75  | 76  | 77  | 78  |
| 72     | 71  | 70  | 69  | 68  | 67  |
| 61     | 62  | 63  | 64  | 65  | 66  |
| 51     | 52  | 53  | 54  | 55  | 56  |
| 41     | 42  | 43  | 44  | 45  | 46  |
| 31     | 32  | 33  | 34  | 35  | 36  |
| 21     | 22  | 23  | 24  | 25  | 26  |
| 11     | 12  | 13  | 14  | 15  | 16  |
| 1      | 2   | 3   | 4   | 5   | 6   |

| Peak # | Start Tube | End Tube |
|--------|------------|----------|
| 1      | A:35       | A:36     |
| 2      | A:37       | A:38     |
| 3      | A:39       | A:51     |
| 4      | A:52       | A:58     |
| 5      | A:59       | A:67     |

| Duration | %B    | Solvent A | Solvent B   |
|----------|-------|-----------|-------------|
| 0.0      | 0.0   | A1 hexane | B2 methanol |
| 1.0      | 0.0   | A1 hexane | B2 methanol |
| 1.3      | 2.5   | A1 hexane | B2 methanol |
| 2.7      | 2.5   | A1 hexane | B2 methanol |
| 7.0      | 100.0 | A1 hexane | B2 methanol |
| 2.0      | 100.0 | A1 hexane | B2 methanol |
| 0.0      | 0.0   | A1 hexane | B2 methanol |
| 1.0      | 0.0   | A1 hexane | B2 methanol |

13 mm x 100 mm Tubes

Sample: RPD-FGF23-A-97

Peak Tube Volume: Max.

All Wavelength (orange): 200nm - 360nm

4x Column: 1

Non-Peak Tube Volume: Max.

Peak Width: 1 min

RediSep Column: Silica 12g

Loading Type: Solid

Threshold: 0.20 AU

SN: E0415064EFECC4 Lot: 2621319040Y

Wavelength 1 (red): 254nm

Peak Width: 1 min

Flow Rate: 30 ml/min

Threshold: 0.20 AU

Equilibration Volume: 100.8 ml

Wavelength 2 (purple): 280nm

Initial Waste: 0.0 ml

Air Purge: 10.0 min

Solvent: A1 hexane

Solvent: B2 methanol

Run Notes:

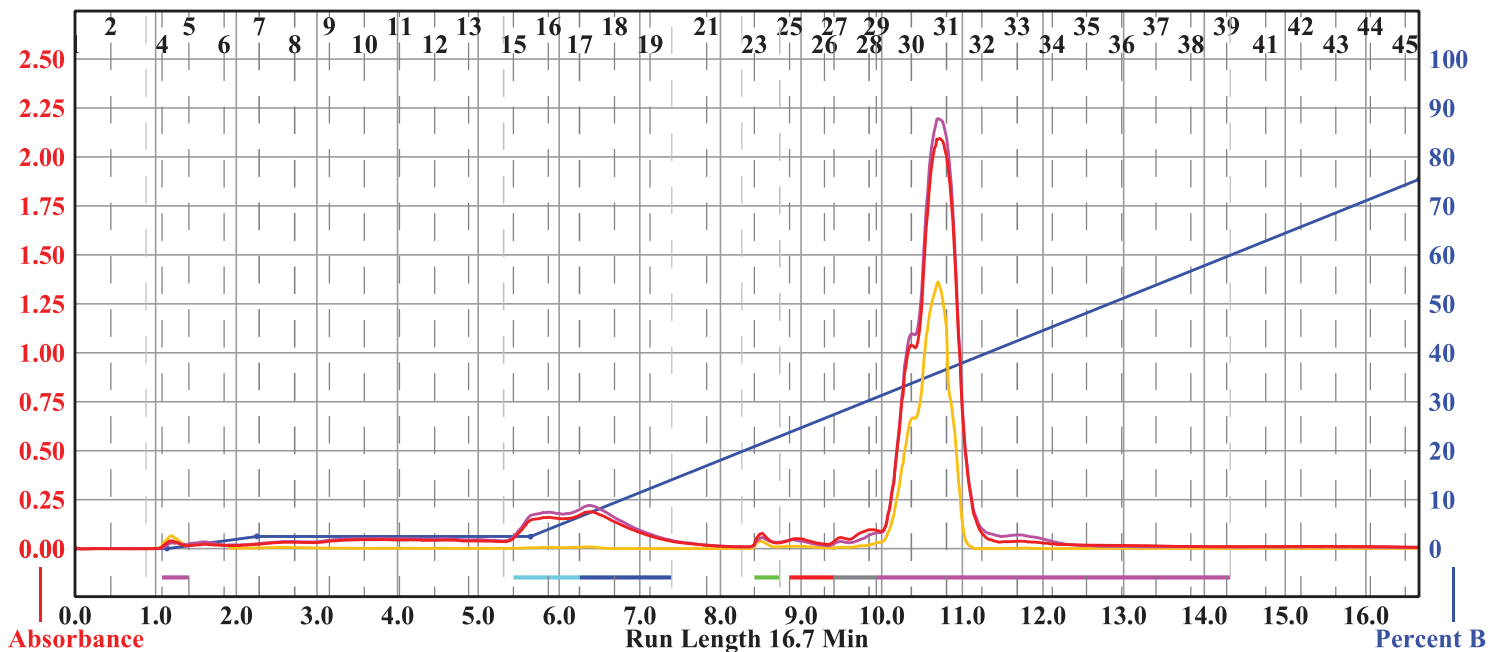

| Rack A |      |      |      |      | Peak # | Start Tube | End Tube |
|--------|------|------|------|------|--------|------------|----------|
| (71)   | (72) | (73) | (74) | (75) | 1      | A:4        | A:4      |
| (70)   | (69) | (68) | (67) | (66) | 2      | A:15       | A:16     |
| (61)   | (62) | (63) | (64) | (65) | 3      | A:17       | A:19     |
| (60)   | (59) | (58) | (57) | (56) | 4      | A:23       | A:23     |
| (51)   | (52) | (53) | (54) | (55) | 5      | A:25       | A:26     |
| (50)   | (49) | (48) | (47) | (46) | 6      | A:27       | A:28     |
| (41)   | (42) | (43) | (44) | (45) | 7      | A:29       | A:39     |
| (40)   | (39) | (38) | (37) | (36) |        |            |          |
| (31)   | (32) | (33) | (34) | (35) |        |            |          |
| (30)   | (29) | (28) | (27) | (26) |        |            |          |
| (21)   | (22) | (23) | (24) | (25) |        |            |          |
| (20)   | (19) | (18) | (17) | (16) |        |            |          |
| (11)   | (12) | (13) | (14) | (15) |        |            |          |
| (10)   | (9)  | (8)  | (7)  | (6)  |        |            |          |
| (1)    | (2)  | (3)  | (4)  | (5)  |        |            |          |

  

| Duration | %B   | Solvent A | Solvent B   |
|----------|------|-----------|-------------|
| 0.0      | 0.0  | A1 hexane | B2 methanol |
| 1.1      | 0.0  | A1 hexane | B2 methanol |
| 1.1      | 2.5  | A1 hexane | B2 methanol |
| 3.4      | 2.5  | A1 hexane | B2 methanol |
| 11.0     | 75.4 | A1 hexane | B2 methanol |

16 mm x 100 mm Tubes

Sample: RPD-FGF23-A-89

Peak Tube Volume: Max.

All Wavelength (orange): 200nm - 360nm

4x Column: 1

Non-Peak Tube Volume: Max.

Peak Width: 1 min

RediSep Column: Silica 12g

Loading Type: Solid

Threshold: 0.20 AU

SN: E04150644E1DB3 Lot: 2621319040Y

Wavelength 1 (red): 254nm

Peak Width: 1 min

Flow Rate: 30 ml/min

Threshold: 0.20 AU

Equilibration Volume: 100.8 ml

Wavelength 2 (purple): 280nm

Initial Waste: 0.0 ml

Air Purge: 10.0 min

Solvent: A1 hexane

Solvent: B2 methanol

Run Notes:

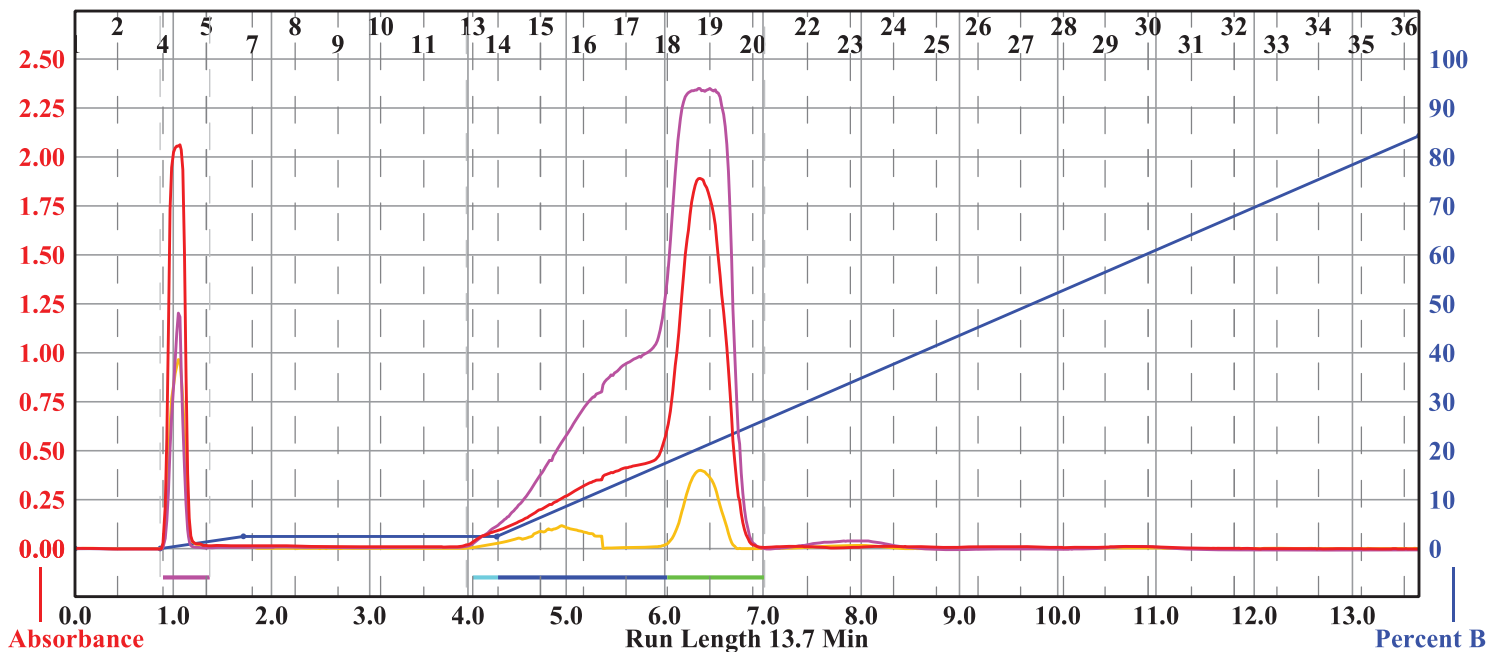

| Rack A |      |      |      |      | Peak #          | Start Tube | End Tube         |                  |
|--------|------|------|------|------|-----------------|------------|------------------|------------------|
| (71)   | (72) | (73) | (74) | (75) | 1               | A:4        | A:5              |                  |
| (70)   | (69) | (68) | (67) | (66) | 2               | A:13       | A:13             |                  |
| (61)   | (62) | (63) | (64) | (65) | 3               | A:14       | A:17             |                  |
| (60)   | (59) | (58) | (57) | (56) | 4               | A:18       | A:20             |                  |
| (51)   | (52) | (53) | (54) | (55) |                 |            |                  |                  |
| (50)   | (49) | (48) | (47) | (46) |                 |            |                  |                  |
| (41)   | (42) | (43) | (44) | (45) |                 |            |                  |                  |
| (40)   | (39) | (38) | (37) | (36) |                 |            |                  |                  |
| (31)   | (32) | (33) | (34) | (35) | <b>Duration</b> | <b>%B</b>  | <b>Solvent A</b> | <b>Solvent B</b> |
| (30)   | (29) | (28) | (27) | (26) | 0.0             | 0.0        | A1 hexane        | B2 methanol      |
| (21)   | (22) | (23) | (24) | (25) | 0.9             | 0.0        | A1 hexane        | B2 methanol      |
| (20)   | (19) | (18) | (17) | (16) | 0.8             | 2.5        | A1 hexane        | B2 methanol      |
| (11)   | (12) | (13) | (14) | (15) | 2.6             | 2.5        | A1 hexane        | B2 methanol      |
| (10)   | (9)  | (8)  | (7)  | (6)  | 9.4             | 84.3       | A1 hexane        | B2 methanol      |
| (1)    | (2)  | (3)  | (4)  | (5)  |                 |            |                  |                  |

16 mm x 100 mm Tubes

Sample: RPD-FGF23-A-77

Peak Tube Volume: Max.

All Wavelength (orange): 200nm - 360nm

4x Column: 2

Non-Peak Tube Volume: Max.

Peak Width: 1 min

RediSep Column: Silica 12g

Loading Type: Solid

Threshold: 0.20 AU

SN: E04150644E2281 Lot: 2621319040Y

Wavelength 1 (red): 254nm

Peak Width: 1 min

Threshold: 0.20 AU

Flow Rate: 30 ml/min

Wavelength 2 (purple): 280nm

Equilibration Volume: 100.8 ml

Initial Waste: 0.0 ml

Air Purge: 5.0 min

Solvent: A1 hexane

Solvent: B2 methanol

Run Notes:

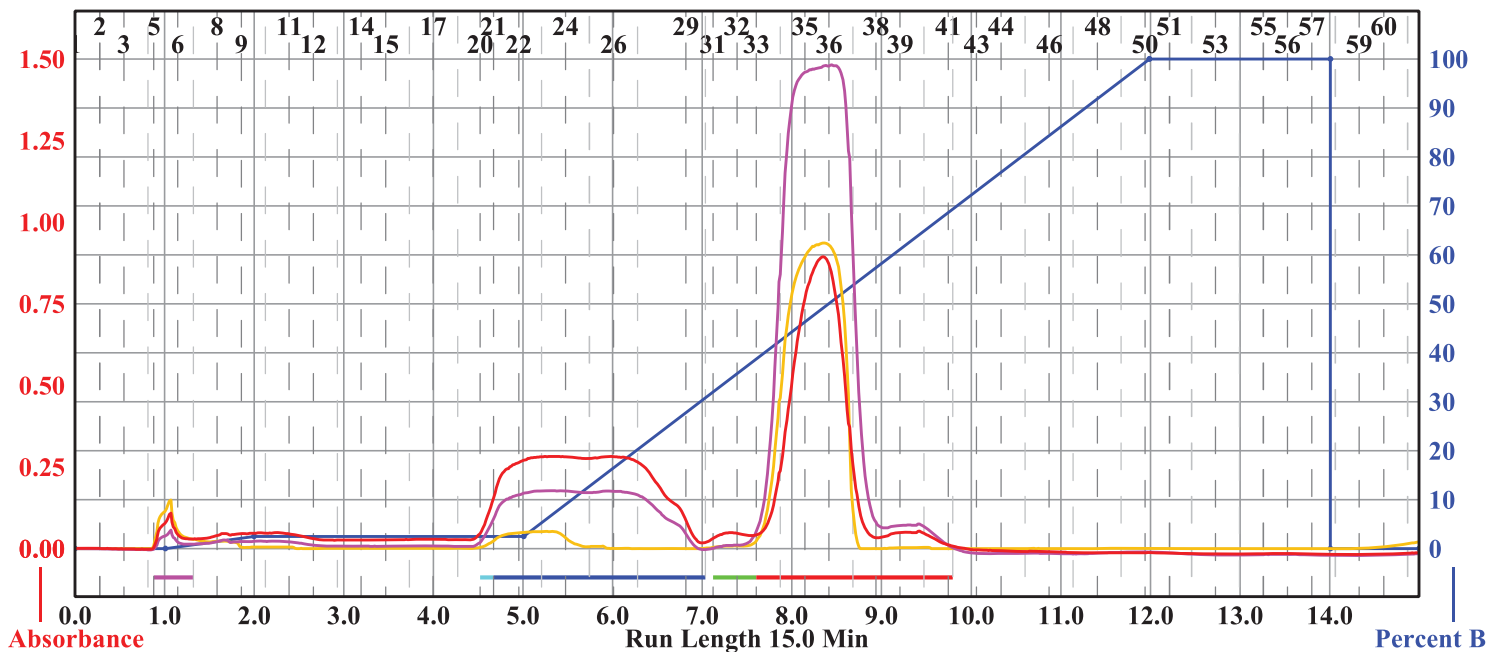

| Rack A |     |     |     |     |     | Peak # | Start Tube | End Tube |
|--------|-----|-----|-----|-----|-----|--------|------------|----------|
| 108    | 107 | 106 | 105 | 104 | 103 | 1      | A:5        | A:6      |
| 97     | 98  | 99  | 100 | 101 | 102 | 2      | A:20       | A:20     |
| 96     | 95  | 94  | 93  | 92  | 91  | 3      | A:21       | A:29     |
| 85     | 86  | 87  | 88  | 89  | 90  | 4      | A:31       | A:32     |
| 84     | 83  | 82  | 81  | 80  | 79  | 5      | A:33       | A:41     |
| 73     | 74  | 75  | 76  | 77  | 78  |        |            |          |
| 72     | 71  | 70  | 69  | 68  | 67  |        |            |          |
| 61     | 62  | 63  | 64  | 65  | 66  |        |            |          |
| 60     | 59  | 58  | 57  | 56  | 55  |        |            |          |
| 49     | 50  | 51  | 52  | 53  | 54  |        |            |          |
| 48     | 47  | 46  | 45  | 44  | 43  |        |            |          |
| 37     | 38  | 39  | 40  | 41  | 42  |        |            |          |
| 36     | 35  | 34  | 33  | 32  | 31  |        |            |          |
| 25     | 26  | 27  | 28  | 29  | 30  |        |            |          |
| 24     | 23  | 22  | 21  | 20  | 19  |        |            |          |
| 13     | 14  | 15  | 16  | 17  | 18  |        |            |          |
| 12     | 11  | 10  | 9   | 8   | 7   |        |            |          |
| 1      | 2   | 3   | 4   | 5   | 6   |        |            |          |

  

| Duration | %B    | Solvent A | Solvent B   |
|----------|-------|-----------|-------------|
| 0.0      | 0.0   | A1 hexane | B2 methanol |
| 1.0      | 0.0   | A1 hexane | B2 methanol |
| 1.0      | 2.5   | A1 hexane | B2 methanol |
| 3.0      | 2.5   | A1 hexane | B2 methanol |
| 7.0      | 100.0 | A1 hexane | B2 methanol |
| 0.0      | 100.0 | A1 hexane | B2 methanol |
| 2.0      | 100.0 | A1 hexane | B2 methanol |
| 0.0      | 0.0   | A1 hexane | B2 methanol |
| 1.0      | 0.0   | A1 hexane | B2 methanol |

13 mm x 100 mm Tubes

Sample: RPD-FGF23-A-79

Peak Tube Volume: Max.

All Wavelength (orange): 200nm - 360nm

4x Column: 2

Non-Peak Tube Volume: Max.

Peak Width: 1 min

RediSep Column: Silica 12g

Loading Type: Solid

Threshold: 0.20 AU

SN: E04150644E23B4 Lot: 2621319040Y

Wavelength 1 (red): 254nm

Peak Width: 1 min

Threshold: 0.20 AU

Flow Rate: 30 ml/min

Wavelength 2 (purple): 280nm

Equilibration Volume: 100.8 ml

Initial Waste: 0.0 ml

Air Purge: 5.0 min

Solvent: A1 hexane

Solvent: B2 methanol

Run Notes:

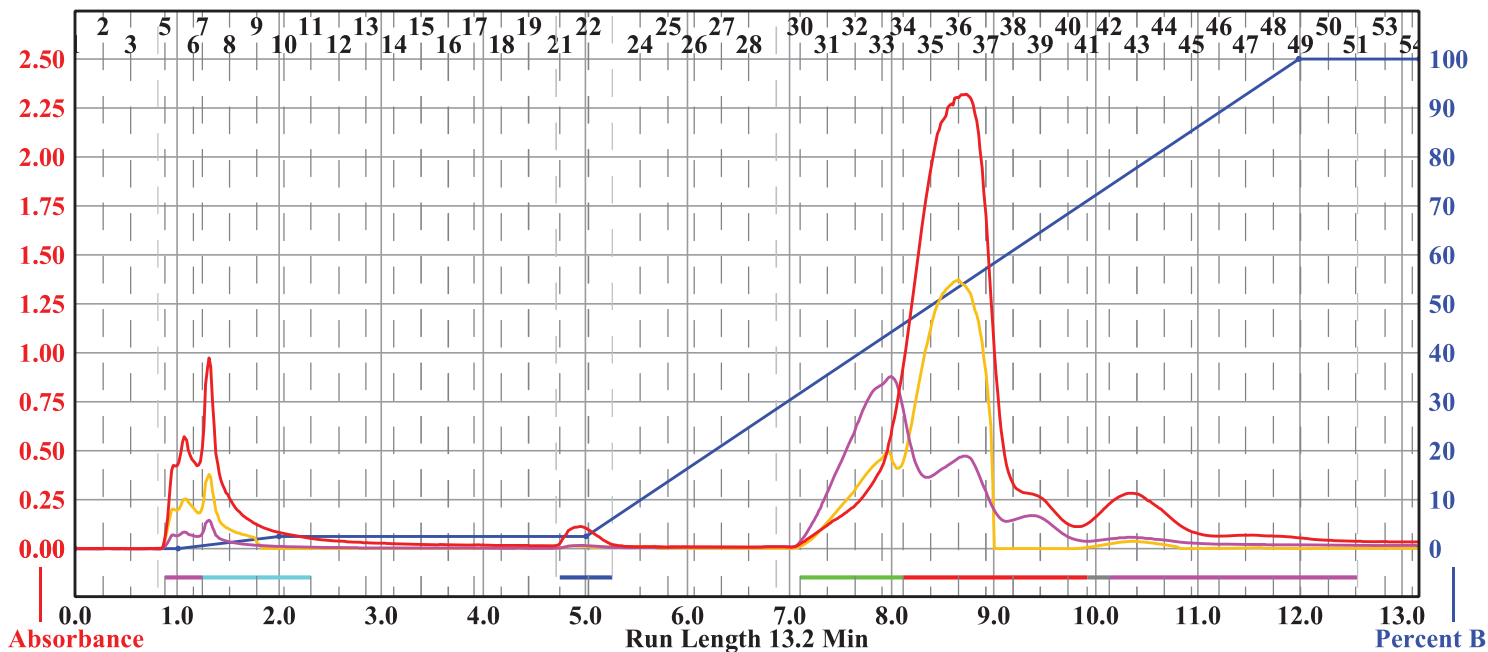

| Rack A |     |     |     |     |     | Peak # | Start Tube | End Tube |
|--------|-----|-----|-----|-----|-----|--------|------------|----------|
| 108    | 107 | 106 | 105 | 104 | 103 | 1      | A:5        | A:6      |
| 97     | 98  | 99  | 100 | 101 | 102 | 2      | A:7        | A:10     |
| 96     | 95  | 94  | 93  | 92  | 91  | 3      | A:21       | A:22     |
| 85     | 86  | 87  | 88  | 89  | 90  | 4      | A:30       | A:33     |
| 84     | 83  | 82  | 81  | 80  | 79  | 5      | A:34       | A:40     |
| 73     | 74  | 75  | 76  | 77  | 78  | 6      | A:41       | A:41     |
| 72     | 71  | 70  | 69  | 68  | 67  | 7      | A:42       | A:51     |
| 61     | 62  | 63  | 64  | 65  | 66  |        |            |          |
| 60     | 59  | 58  | 57  | 56  | 55  |        |            |          |
| 49     | 50  | 51  | 52  | 53  | 54  |        |            |          |
| 48     | 47  | 46  | 45  | 44  | 43  |        |            |          |
| 37     | 38  | 39  | 40  | 41  | 42  |        |            |          |
| 36     | 35  | 34  | 33  | 32  | 31  |        |            |          |
| 25     | 26  | 27  | 28  | 29  | 30  |        |            |          |
| 24     | 23  | 22  | 21  | 20  | 19  |        |            |          |
| 13     | 14  | 15  | 16  | 17  | 18  |        |            |          |
| 12     | 11  | 10  | 9   | 8   | 7   |        |            |          |
| 1      | 2   | 3   | 4   | 5   | 6   |        |            |          |

  

| Duration | %B    | Solvent A | Solvent B   |
|----------|-------|-----------|-------------|
| 0.0      | 0.0   | A1 hexane | B2 methanol |
| 1.0      | 0.0   | A1 hexane | B2 methanol |
| 1.0      | 2.5   | A1 hexane | B2 methanol |
| 3.0      | 2.5   | A1 hexane | B2 methanol |
| 7.0      | 100.0 | A1 hexane | B2 methanol |
| 0.0      | 100.0 | A1 hexane | B2 methanol |
| 1.2      | 100.0 | A1 hexane | B2 methanol |

13 mm x 100 mm Tubes

Sample: RPD-FGF23-A-83

Peak Tube Volume: Max.

All Wavelength (orange): 200nm - 360nm

4x Column: 2

Non-Peak Tube Volume: Max.

Peak Width: 1 min

RediSep Column: Silica 12g

Loading Type: Solid

Threshold: 0.20 AU

SN: E04150644E1C81 Lot: 2621319040Y

Wavelength 1 (red): 254nm

Peak Width: 1 min

Threshold: 0.20 AU

Flow Rate: 30 ml/min

Wavelength 2 (purple): 280nm

Equilibration Volume: 100.8 ml

Initial Waste: 0.0 ml

Air Purge: 3.2 min

Solvent: A1 hexane

Solvent: B2 methanol

Run Notes:

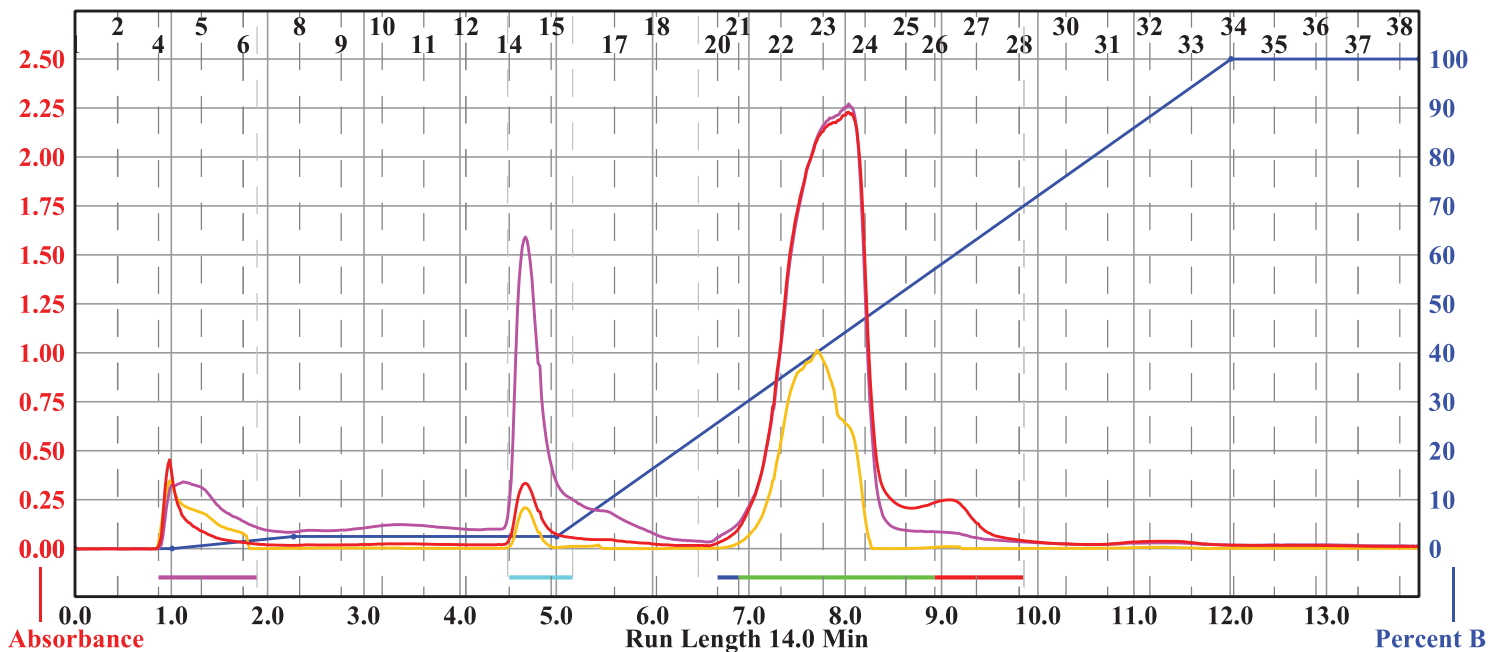

| Rack A |    |    |    |    | Peak # | Start Tube | End Tube |
|--------|----|----|----|----|--------|------------|----------|
| 71     | 72 | 73 | 74 | 75 | 1      | A:4        | A:6      |
| 70     | 69 | 68 | 67 | 66 | 2      | A:14       | A:15     |
| 61     | 62 | 63 | 64 | 65 | 3      | A:20       | A:20     |
| 60     | 59 | 58 | 57 | 56 | 4      | A:21       | A:25     |
| 51     | 52 | 53 | 54 | 55 | 5      | A:26       | A:28     |
| 50     | 49 | 48 | 47 | 46 |        |            |          |
| 41     | 42 | 43 | 44 | 45 |        |            |          |
| 40     | 39 | 38 | 37 | 36 |        |            |          |
| 31     | 32 | 33 | 34 | 35 |        |            |          |
| 30     | 29 | 28 | 27 | 26 |        |            |          |
| 21     | 22 | 23 | 24 | 25 |        |            |          |
| 20     | 19 | 18 | 17 | 16 |        |            |          |
| 11     | 12 | 13 | 14 | 15 |        |            |          |
| 10     | 9  | 8  | 7  | 6  |        |            |          |
| 1      | 2  | 3  | 4  | 5  |        |            |          |

  

| Duration | %B    | Solvent A | Solvent B   |
|----------|-------|-----------|-------------|
| 0.0      | 0.0   | A1 hexane | B2 methanol |
| 1.0      | 0.0   | A1 hexane | B2 methanol |
| 1.3      | 2.5   | A1 hexane | B2 methanol |
| 2.7      | 2.5   | A1 hexane | B2 methanol |
| 7.0      | 100.0 | A1 hexane | B2 methanol |
| 2.0      | 100.0 | A1 hexane | B2 methanol |

16 mm x 100 mm Tubes

Sample: RPD-FGF23-A-69

Peak Tube Volume: Max.

All Wavelength (orange): 200nm - 360nm

4x Column: 2

Non-Peak Tube Volume: Max.

Peak Width: 1 min

RediSep Column: Silica 12g

Loading Type: Solid

Threshold: 0.20 AU

SN: E0415064EFE44C Lot: 2621319040Y

Wavelength 1 (red): 254nm

Peak Width: 1 min

Flow Rate: 30 ml/min

Threshold: 0.20 AU

Equilibration Volume: 100.8 ml

Wavelength 2 (purple): 280nm

Initial Waste: 0.0 ml

Air Purge: 5.0 min

Solvent: A1 hexane

Solvent: B2 methanol

Run Notes:

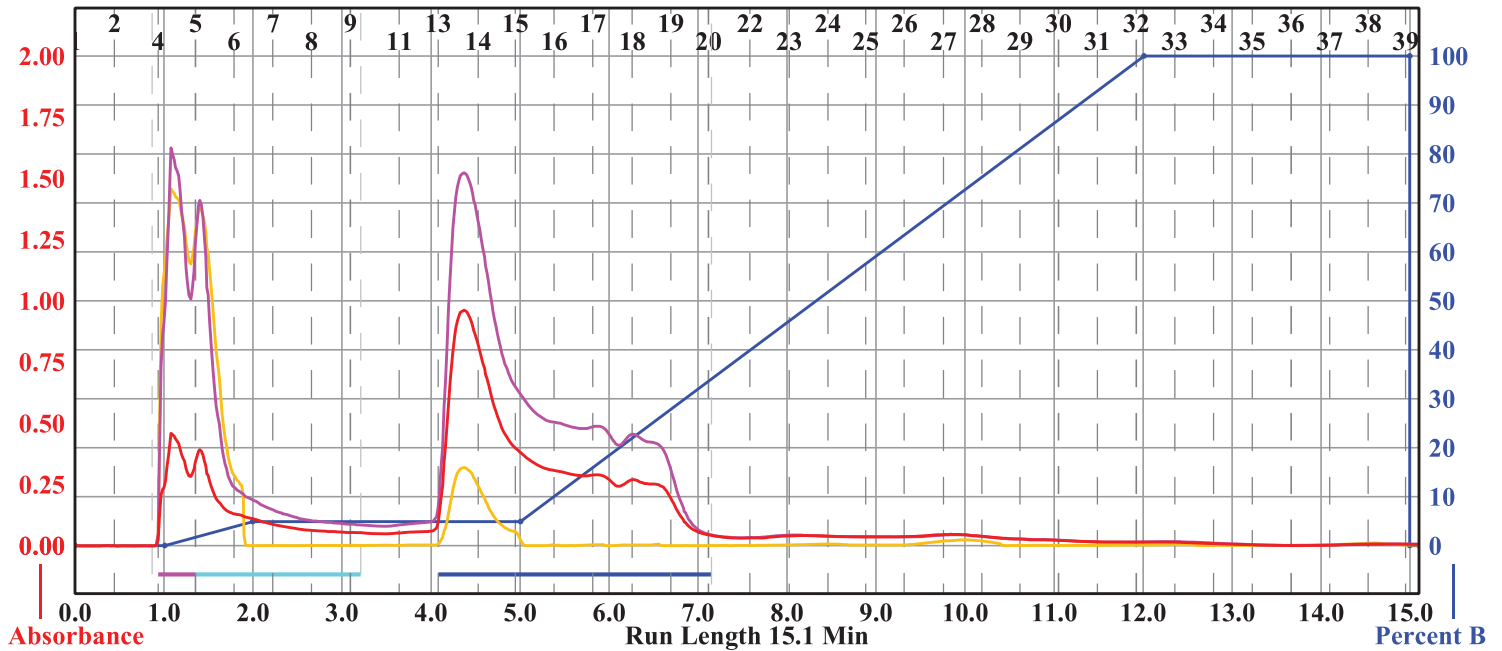

| Rack A |      |      |      |      | Peak # | Start Tube | End Tube |
|--------|------|------|------|------|--------|------------|----------|
| (71)   | (72) | (73) | (74) | (75) | 1      | A:4        | A:4      |
| (70)   | (69) | (68) | (67) | (66) | 2      | A:5        | A:9      |
| (61)   | (62) | (63) | (64) | (65) | 3      | A:13       | A:20     |
| (60)   | (59) | (58) | (57) | (56) |        |            |          |
| (51)   | (52) | (53) | (54) | (55) |        |            |          |
| (50)   | (49) | (48) | (47) | (46) |        |            |          |
| (41)   | (42) | (43) | (44) | (45) |        |            |          |
| (40)   | (39) | (38) | (37) | (36) |        |            |          |
| (31)   | (32) | (33) | (34) | (35) |        |            |          |
| (30)   | (29) | (28) | (27) | (26) |        |            |          |
| (21)   | (22) | (23) | (24) | (25) |        |            |          |
| (20)   | (19) | (18) | (17) | (16) |        |            |          |
| (11)   | (12) | (13) | (14) | (15) |        |            |          |
| (10)   | (9)  | (8)  | (7)  | (6)  |        |            |          |
| (1)    | (2)  | (3)  | (4)  | (5)  |        |            |          |

  

| Duration | %B    | Solvent A | Solvent B   |
|----------|-------|-----------|-------------|
| 0.0      | 0.0   | A1 hexane | B2 methanol |
| 1.0      | 0.0   | A1 hexane | B2 methanol |
| 1.0      | 4.9   | A1 hexane | B2 methanol |
| 3.0      | 4.9   | A1 hexane | B2 methanol |
| 7.0      | 100.0 | A1 hexane | B2 methanol |
| 3.0      | 100.0 | A1 hexane | B2 methanol |
| 0.0      | 0.0   | A1 hexane | B2 methanol |
| 0.1      | 0.0   | A1 hexane | B2 methanol |

16 mm x 100 mm Tubes

Sample: RPD-FGF23-A-71

Peak Tube Volume: Max.

All Wavelength (orange): 200nm - 360nm

4x Column: 2

Non-Peak Tube Volume: Max.

Peak Width: 1 min

RediSep Column: Silica 12g

Loading Type: Solid

Threshold: 0.20 AU

SN: E04150644E16DE Lot: 2621319040Y

Wavelength 1 (red): 254nm

Peak Width: 1 min

Flow Rate: 30 ml/min

Threshold: 0.20 AU

Equilibration Volume: 100.8 ml

Wavelength 2 (purple): 280nm

Initial Waste: 0.0 ml

Air Purge: 5.0 min

Solvent: A1 hexane

Solvent: B2 methanol

Run Notes:

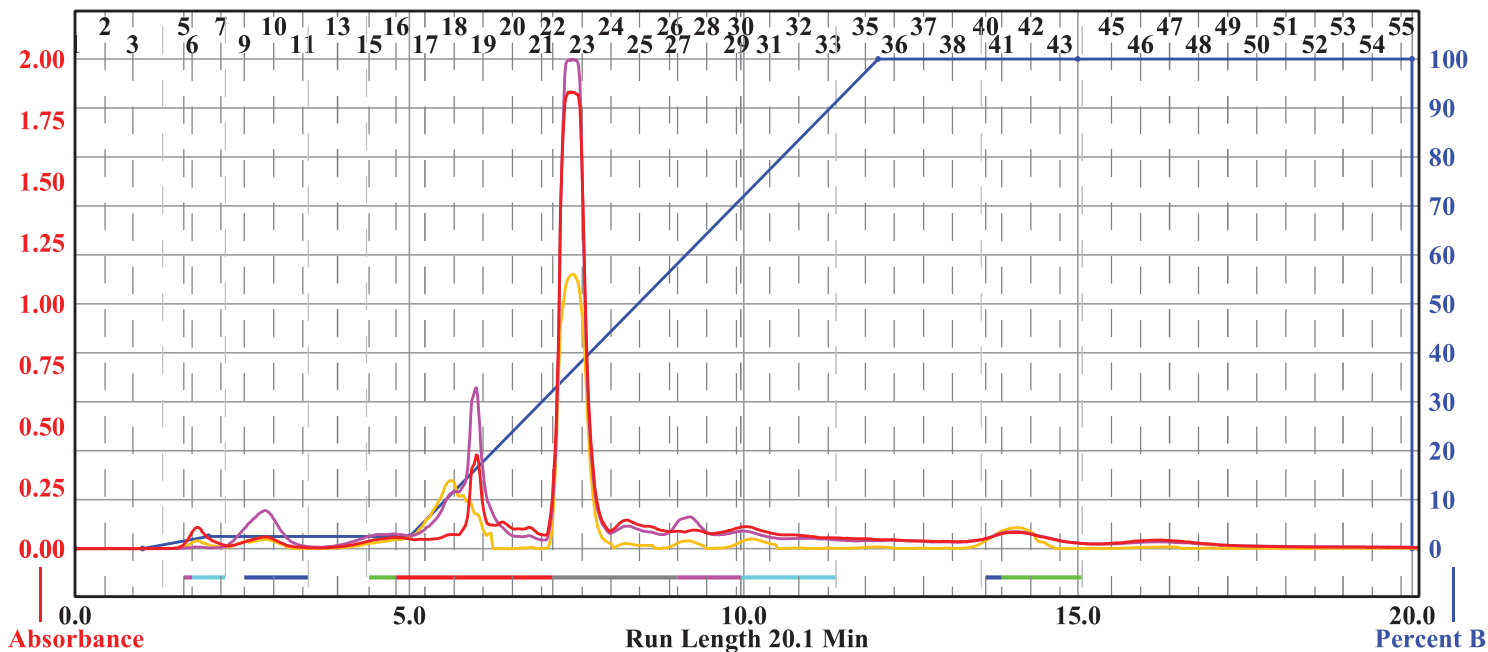

| Rack A |    |    |    |    | Peak #   | Start Tube | End Tube  |             |
|--------|----|----|----|----|----------|------------|-----------|-------------|
| 71     | 72 | 73 | 74 | 75 | 1        | A:5        | A:5       |             |
| 70     | 69 | 68 | 67 | 66 | 2        | A:6        | A:7       |             |
| 61     | 62 | 63 | 64 | 65 | 3        | A:9        | A:11      |             |
| 60     | 59 | 58 | 57 | 56 | 4        | A:15       | A:15      |             |
| 51     | 52 | 53 | 54 | 55 | 5        | A:16       | A:21      |             |
| 50     | 49 | 48 | 47 | 46 | 6        | A:22       | A:26      |             |
| 41     | 42 | 43 | 44 | 45 | 7        | A:27       | A:29      |             |
| 40     | 39 | 38 | 37 | 36 | 8        | A:30       | A:33      |             |
| 31     | 32 | 33 | 34 | 35 | 9        | A:40       | A:40      |             |
| 30     | 29 | 28 | 27 | 26 | 10       | A:41       | A:43      |             |
| 21     | 22 | 23 | 24 | 25 | Duration | %B         | Solvent A | Solvent B   |
| 20     | 19 | 18 | 17 | 16 | 0.0      | 0.0        | A1 hexane | B2 methanol |
| 11     | 12 | 13 | 14 | 15 | 1.0      | 0.0        | A1 hexane | B2 methanol |
| 10     | 9  | 8  | 7  | 6  | 1.0      | 2.5        | A1 hexane | B2 methanol |
| 1      | 2  | 3  | 4  | 5  | 3.0      | 2.5        | A1 hexane | B2 methanol |
|        |    |    |    |    | 7.0      | 100.0      | A1 hexane | B2 methanol |
|        |    |    |    |    | 3.0      | 100.0      | A1 hexane | B2 methanol |
|        |    |    |    |    | 5.0      | 100.0      | A1 hexane | B2 methanol |
|        |    |    |    |    | 0.0      | 0.0        | A1 hexane | B2 methanol |
|        |    |    |    |    | 0.1      | 0.0        | A1 hexane | B2 methanol |

16 mm x 100 mm Tubes



Compound 8b

Rf 200

Friday 13 January 2017 02:00PM

Sample: JDC-FGF23-A-21-2

Peak Tube Volume: Max.

All Wavelength (orange): 200nm - 360nm

4x Column: 3

Non-Peak Tube Volume: Max.

Peak Width: 30 sec

RediSep Column: Silica 4g

Loading Type: Solid

Threshold: 0.20 AU

Flow Rate: 18 ml/min

Wavelength 1 (red): 254nm

Peak Width: 30 sec

Equilibration Volume: 33.6 ml

Threshold: 0.20 AU

Initial Waste: 0.0 ml

Wavelength 2 (purple): 280nm

Air Purge: 5.0 min

Solvent: A1 hexane

Solvent: B2 methanol

Run Notes:

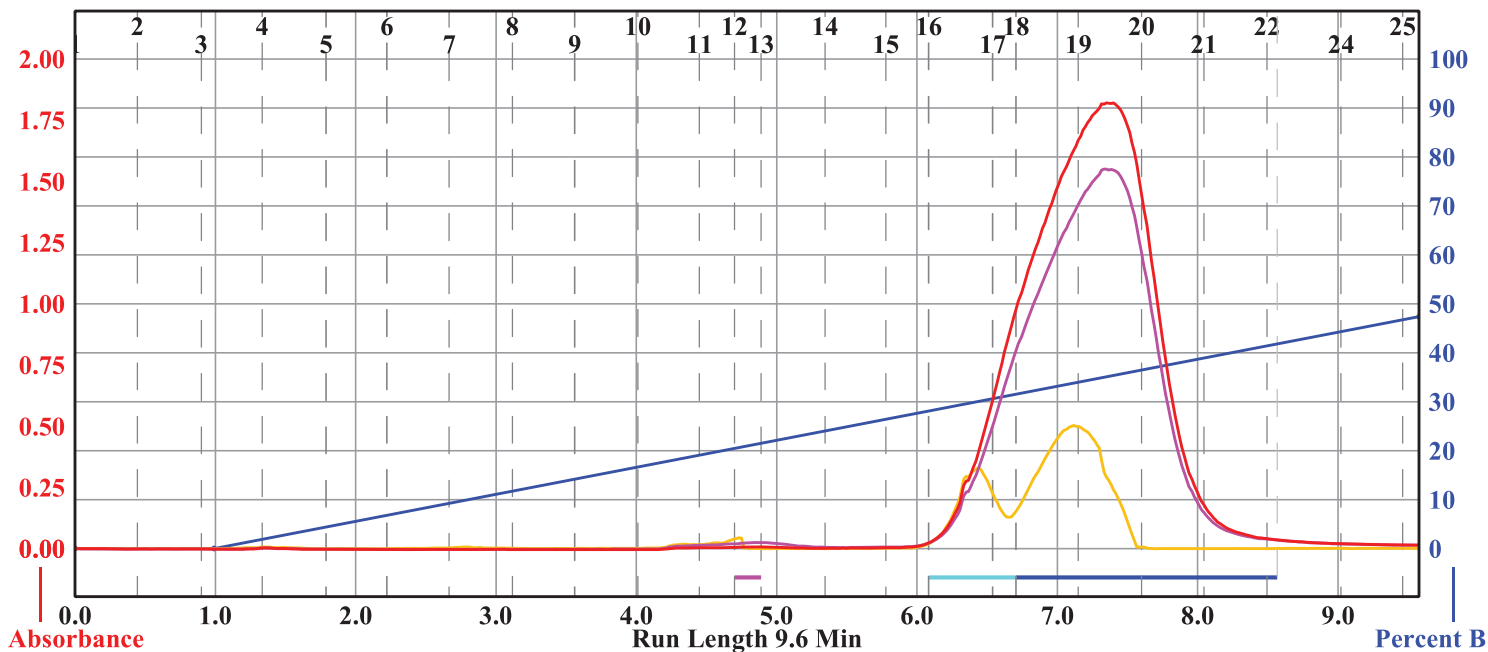

| Rack A |     |     |     |     |     |
|--------|-----|-----|-----|-----|-----|
| 108    | 107 | 106 | 105 | 104 | 103 |
| 97     | 98  | 99  | 100 | 101 | 102 |
| 96     | 95  | 94  | 93  | 92  | 91  |
| 85     | 86  | 87  | 88  | 89  | 90  |
| 84     | 83  | 82  | 81  | 80  | 79  |
| 73     | 74  | 75  | 76  | 77  | 78  |
| 72     | 71  | 70  | 69  | 68  | 67  |
| 61     | 62  | 63  | 64  | 65  | 66  |
| 60     | 59  | 58  | 57  | 56  | 55  |
| 49     | 50  | 51  | 52  | 53  | 54  |
| 48     | 47  | 46  | 45  | 44  | 43  |
| 37     | 38  | 39  | 40  | 41  | 42  |
| 36     | 35  | 34  | 33  | 32  | 31  |
| 25     | 26  | 27  | 28  | 29  | 30  |
| 24     | 23  | 22  | 21  | 20  | 19  |
| 13     | 14  | 15  | 16  | 17  | 18  |
| 12     | 11  | 10  | 9   | 8   | 7   |
| 1      | 2   | 3   | 4   | 5   | 6   |

| Peak # | Start Tube | End Tube |
|--------|------------|----------|
| 1      | A:12       | A:12     |
| 2      | A:16       | A:17     |
| 3      | A:18       | A:22     |

| Duration | %B   | Solvent A | Solvent B   |
|----------|------|-----------|-------------|
| 0.0      | 0.0  | A1 hexane | B2 methanol |
| 1.0      | 0.0  | A1 hexane | B2 methanol |
| 8.6      | 47.4 | A1 hexane | B2 methanol |

13 mm x 100 mm Tubes

Sample: JWC-FGF23-A-59

Peak Tube Volume: Max.

All Wavelength (orange): 200nm - 360nm

4x Column: 2

Non-Peak Tube Volume: Max.

Peak Width: 30 sec

RediSep Column: Al2O3 pH=7 8g

Loading Type: Solid

Threshold: 0.20 AU

Flow Rate: 18 ml/min

Wavelength 1 (red): 254nm

Peak Width: 30 sec

Equilibration Volume: 33.6 ml

Threshold: 0.20 AU

Initial Waste: 0.0 ml

Wavelength 2 (purple): 280nm

Air Purge: 10.0 min

Solvent: A1 hexane

Solvent: B2 methanol

Run Notes:

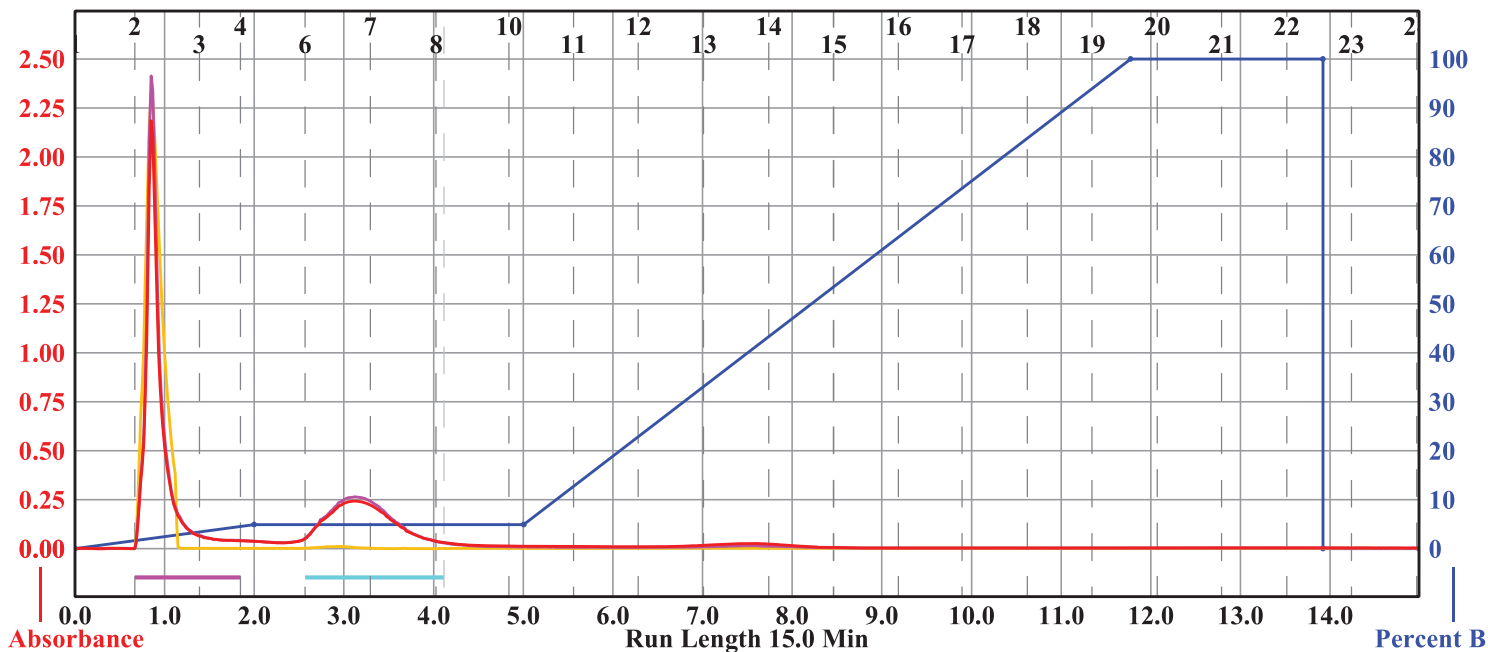

| Rack A |      |      |      |      | Peak #   | Start Tube | End Tube  |             |
|--------|------|------|------|------|----------|------------|-----------|-------------|
| (71)   | (72) | (73) | (74) | (75) | 1        | A:2        | A:3       |             |
| (70)   | (69) | (68) | (67) | (66) | 2        | A:6        | A:8       |             |
| (61)   | (62) | (63) | (64) | (65) |          |            |           |             |
| (60)   | (59) | (58) | (57) | (56) |          |            |           |             |
| (51)   | (52) | (53) | (54) | (55) |          |            |           |             |
| (50)   | (49) | (48) | (47) | (46) |          |            |           |             |
| (41)   | (42) | (43) | (44) | (45) |          |            |           |             |
| (40)   | (39) | (38) | (37) | (36) |          |            |           |             |
| (31)   | (32) | (33) | (34) | (35) | Duration | %B         | Solvent A | Solvent B   |
| (30)   | (29) | (28) | (27) | (26) | 0.0      | 0.0        | A1 hexane | B2 methanol |
| (21)   | (22) | (23) | (24) | (25) | 2.0      | 4.9        | A1 hexane | B2 methanol |
| (20)   | (19) | (18) | (17) | (16) | 3.0      | 4.9        | A1 hexane | B2 methanol |
| (11)   | (12) | (13) | (14) | (15) | 6.8      | 100.0      | A1 hexane | B2 methanol |
| (10)   | (9)  | (8)  | (7)  | (6)  | 2.1      | 100.0      | A1 hexane | B2 methanol |
| (1)    | (2)  | (3)  | (4)  | (5)  | 0.0      | 0.0        | A1 hexane | B2 methanol |
|        |      |      |      |      | 1.1      | 0.0        | A1 hexane | B2 methanol |

16 mm x 100 mm Tubes

Compound 8f

Rf 200

Wednesday 11 January 2017 02:19PM

Sample: RPD-FGF23-A-31

Peak Tube Volume: 13 ml

All Wavelength (orange): 200nm - 360nm

4x Column: 1

Non-Peak Tube Volume: 13 ml

Peak Width: 1 min

RediSep Column: Silica 12g Gold

Loading Type: Solid

Threshold: 0.20 AU

SN: E04150644DB5EF Lot: 2622248050W

Wavelength 1 (red): 254nm

Peak Width: 1 min

Flow Rate: 30 ml/min

Threshold: 0.20 AU

Equilibration Volume: 100.8 ml

Wavelength 2 (purple): 280nm

Initial Waste: 0.0 ml

Air Purge: 5.0 min

Solvent: A1 hexane

Solvent: B2 methanol

Run Notes:

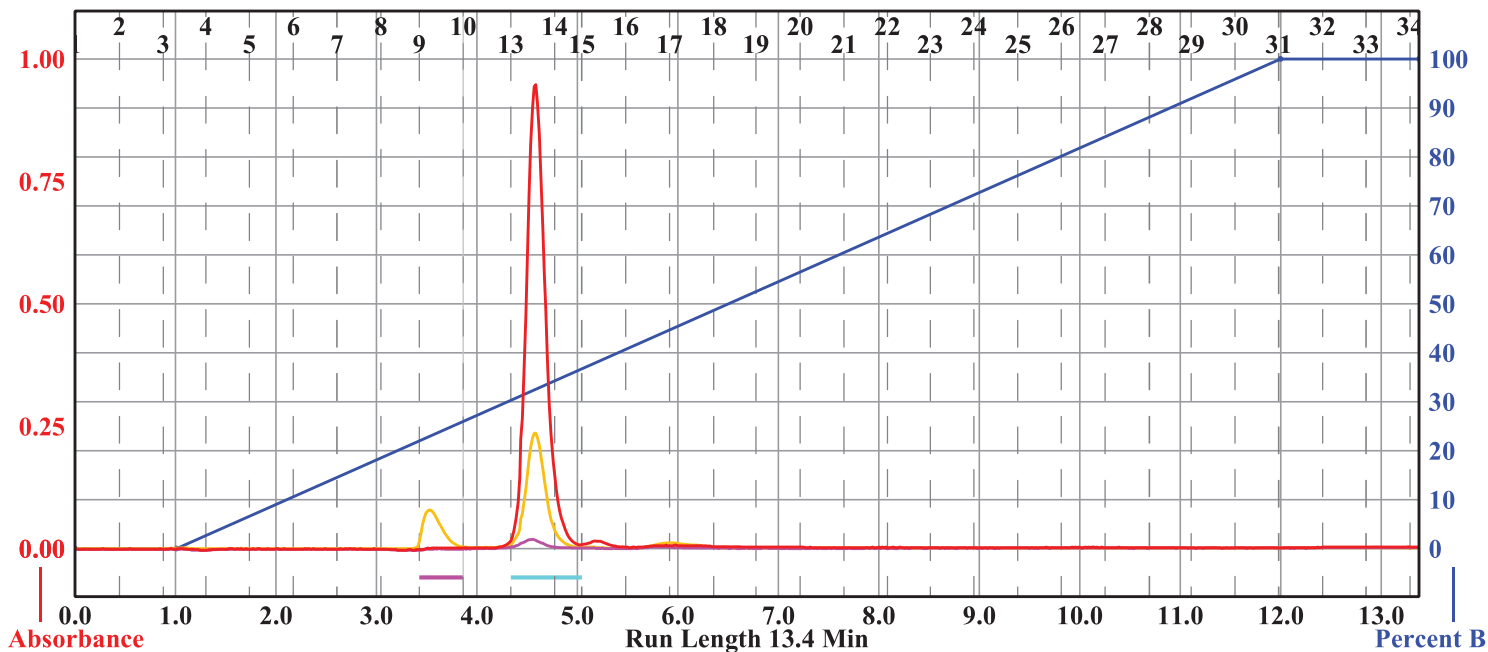

| Rack A |    |    |    |    |
|--------|----|----|----|----|
| 71     | 72 | 73 | 74 | 75 |
| 70     | 69 | 68 | 67 | 66 |
| 61     | 62 | 63 | 64 | 65 |
| 60     | 59 | 58 | 57 | 56 |
| 51     | 52 | 53 | 54 | 55 |
| 50     | 49 | 48 | 47 | 46 |
| 41     | 42 | 43 | 44 | 45 |
| 40     | 39 | 38 | 37 | 36 |
| 31     | 32 | 33 | 34 | 35 |
| 30     | 29 | 28 | 27 | 26 |
| 21     | 22 | 23 | 24 | 25 |
| 20     | 19 | 18 | 17 | 16 |
| 11     | 12 | 13 | 14 | 15 |
| 10     | 9  | 8  | 7  | 6  |
| 1      | 2  | 3  | 4  | 5  |

16 mm x 100 mm Tubes

| Peak # | Start Tube | End Tube |
|--------|------------|----------|
| 1      | A:9        | A:10     |
| 2      | A:13       | A:14     |

| Duration | %B    | Solvent A | Solvent B   |
|----------|-------|-----------|-------------|
| 0.0      | 0.0   | A1 hexane | B2 methanol |
| 1.0      | 0.0   | A1 hexane | B2 methanol |
| 11.0     | 100.0 | A1 hexane | B2 methanol |
| 1.4      | 100.0 | A1 hexane | B2 methanol |

Sample: JWC-FGF23-A-43

Peak Tube Volume: Max.

All Wavelength (orange): 200nm - 360nm

4x Column: 2

Non-Peak Tube Volume: Max.

Peak Width: 30 sec

RediSep Column: Silica 4g

Loading Type: Solid

Threshold: 0.20 AU

Flow Rate: 18 ml/min

Wavelength 1 (red): 254nm

Peak Width: 30 sec

Equilibration Volume: 33.6 ml

Threshold: 0.20 AU

Initial Waste: 0.0 ml

Wavelength 2 (purple): 280nm

Air Purge: 10.0 min

Solvent: A1 hexane

Solvent: B2 methanol

Run Notes:

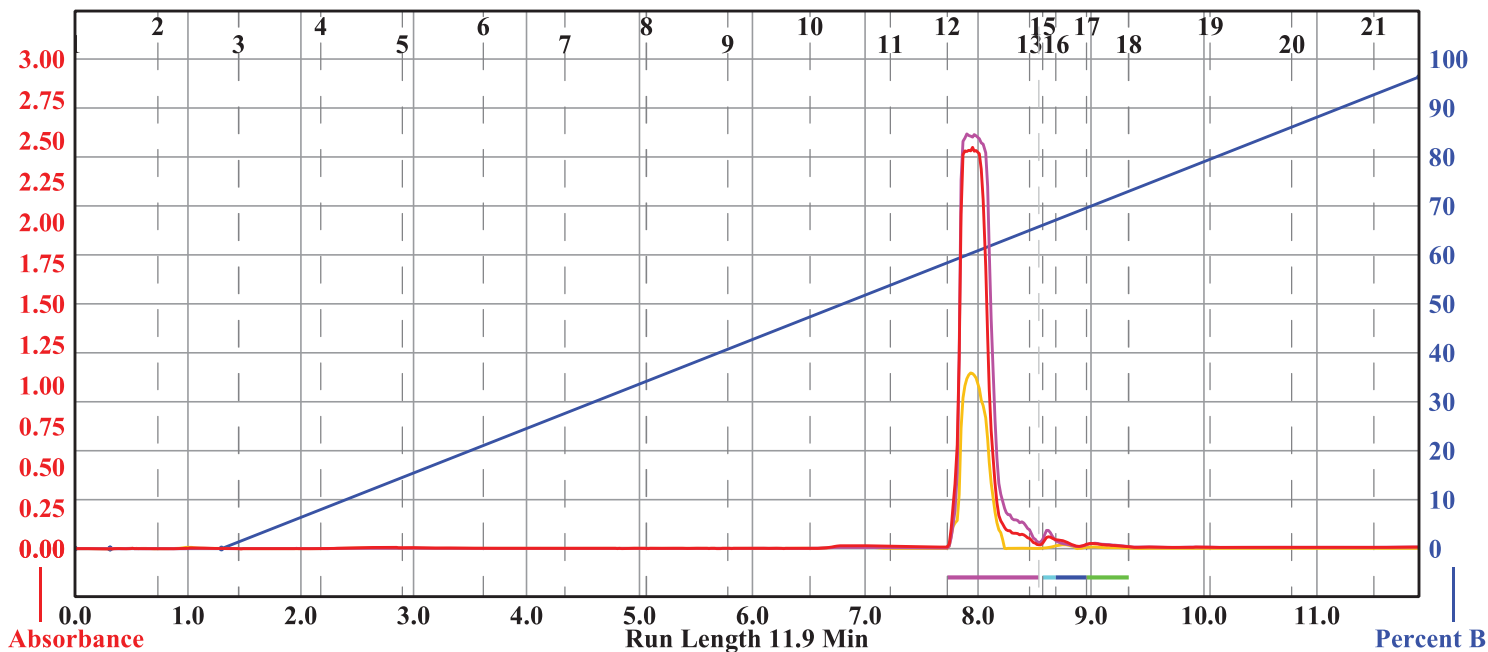

| Rack A |      |      |      |      | Peak # | Start Tube | End Tube |
|--------|------|------|------|------|--------|------------|----------|
| (71)   | (72) | (73) | (74) | (75) | 1      | A:12       | A:13     |
| (70)   | (69) | (68) | (67) | (66) | 2      | A:15       | A:15     |
| (61)   | (62) | (63) | (64) | (65) | 3      | A:16       | A:16     |
| (60)   | (59) | (58) | (57) | (56) | 4      | A:17       | A:17     |
| (51)   | (52) | (53) | (54) | (55) |        |            |          |
| (50)   | (49) | (48) | (47) | (46) |        |            |          |
| (41)   | (42) | (43) | (44) | (45) |        |            |          |
| (40)   | (39) | (38) | (37) | (36) |        |            |          |
| (31)   | (32) | (33) | (34) | (35) |        |            |          |
| (30)   | (29) | (28) | (27) | (26) |        |            |          |
| (21)   | (22) | (23) | (24) | (25) |        |            |          |
| (20)   | (19) | (18) | (17) | (16) |        |            |          |
| (11)   | (12) | (13) | (14) | (15) |        |            |          |
| (10)   | (9)  | (8)  | (7)  | (6)  |        |            |          |
| (1)    | (2)  | (3)  | (4)  | (5)  |        |            |          |

  

| Duration | %B   | Solvent A | Solvent B   |
|----------|------|-----------|-------------|
| 0.0      | 0.0  | A1 hexane | B2 methanol |
| 0.3      | 0.0  | A1 hexane | B2 methanol |
| 0.0      | 0.0  | A1 hexane | B2 methanol |
| 1.0      | 0.0  | A1 hexane | B2 methanol |
| 10.6     | 96.3 | A1 hexane | B2 methanol |

16 mm x 100 mm Tubes

Sample: RPD-FGF23-A-47

Peak Tube Volume: Max.

All Wavelength (orange): 200nm - 360nm

4x Column: 2

Non-Peak Tube Volume: Max.

Peak Width: 30 sec

RediSep Column: Silica 4g

Loading Type: Solid

Threshold: 0.20 AU

Flow Rate: 18 ml/min

Wavelength 1 (red): 254nm

Peak Width: 30 sec

Equilibration Volume: 33.6 ml

Threshold: 0.20 AU

Initial Waste: 0.0 ml

Wavelength 2 (purple): 280nm

Air Purge: 10.0 min

Solvent: A1 hexane

Solvent: B2 methanol

Run Notes:

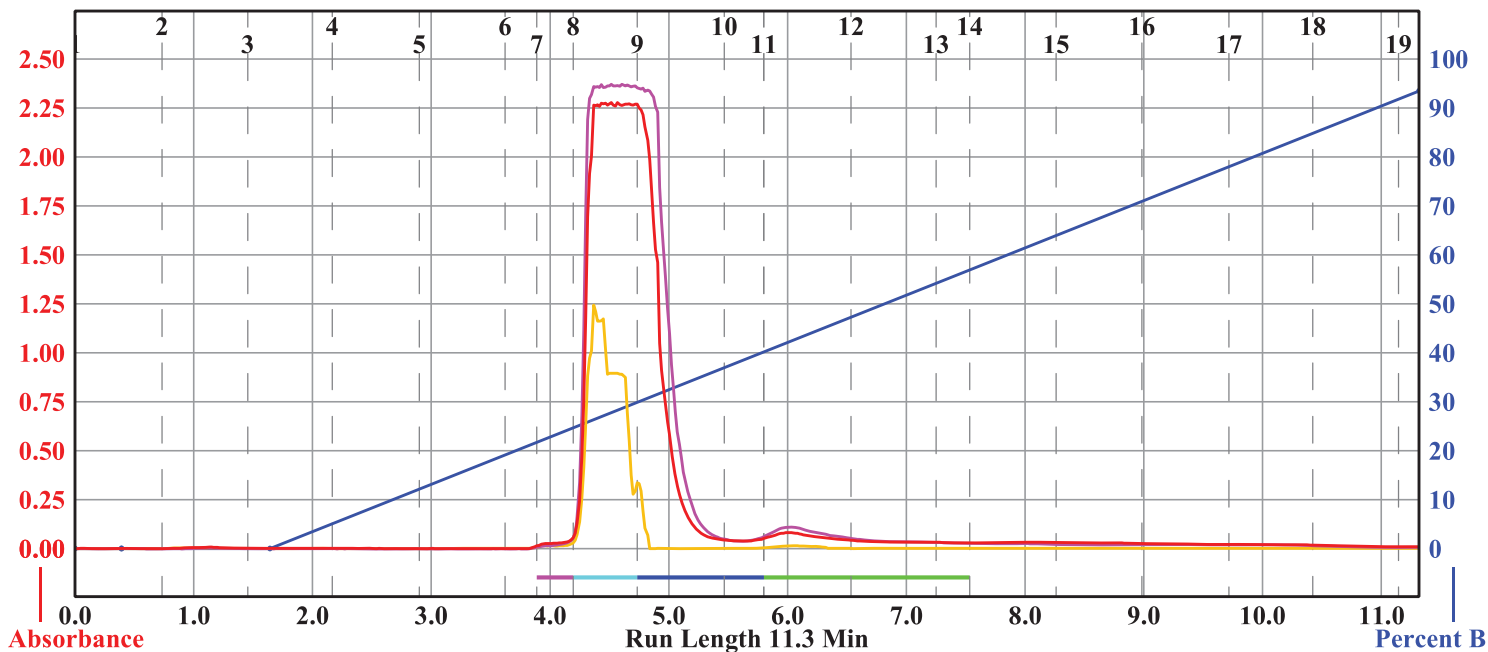

| Rack A |      |      |      |      | Peak #          | Start Tube | End Tube         |                  |
|--------|------|------|------|------|-----------------|------------|------------------|------------------|
| (71)   | (72) | (73) | (74) | (75) | 1               | A:7        | A:7              |                  |
| (70)   | (69) | (68) | (67) | (66) | 2               | A:8        | A:8              |                  |
| (61)   | (62) | (63) | (64) | (65) | 3               | A:9        | A:10             |                  |
| (60)   | (59) | (58) | (57) | (56) | 4               | A:11       | A:13             |                  |
| (51)   | (52) | (53) | (54) | (55) |                 |            |                  |                  |
| (50)   | (49) | (48) | (47) | (46) |                 |            |                  |                  |
| (41)   | (42) | (43) | (44) | (45) |                 |            |                  |                  |
| (40)   | (39) | (38) | (37) | (36) |                 |            |                  |                  |
| (31)   | (32) | (33) | (34) | (35) | <b>Duration</b> | <b>%B</b>  | <b>Solvent A</b> | <b>Solvent B</b> |
| (30)   | (29) | (28) | (27) | (26) | 0.0             | 0.0        | A1 hexane        | B2 methanol      |
| (21)   | (22) | (23) | (24) | (25) | 0.4             | 0.0        | A1 hexane        | B2 methanol      |
| (20)   | (19) | (18) | (17) | (16) | 0.0             | 0.0        | A1 hexane        | B2 methanol      |
| (11)   | (12) | (13) | (14) | (15) | 1.2             | 0.0        | A1 hexane        | B2 methanol      |
| (10)   | (9)  | (8)  | (7)  | (6)  | 9.7             | 93.5       | A1 hexane        | B2 methanol      |
| (1)    | (2)  | (3)  | (4)  | (5)  |                 |            |                  |                  |

16 mm x 100 mm Tubes

Sample: JWC-FGF23-A-39-2

Peak Tube Volume: Max.

All Wavelength (orange): 200nm - 360nm

4x Column: 2

Non-Peak Tube Volume: Max.

Peak Width: 30 sec

RediSep Column: Silica 4g

Loading Type: Solid

Threshold: 0.20 AU

Flow Rate: 18 ml/min

Wavelength 1 (red): 254nm

Peak Width: 30 sec

Equilibration Volume: 33.6 ml

Threshold: 0.20 AU

Initial Waste: 0.0 ml

Wavelength 2 (purple): 280nm

Air Purge: 10.0 min

Solvent: A1 hexane

Solvent: B2 methanol

Run Notes:

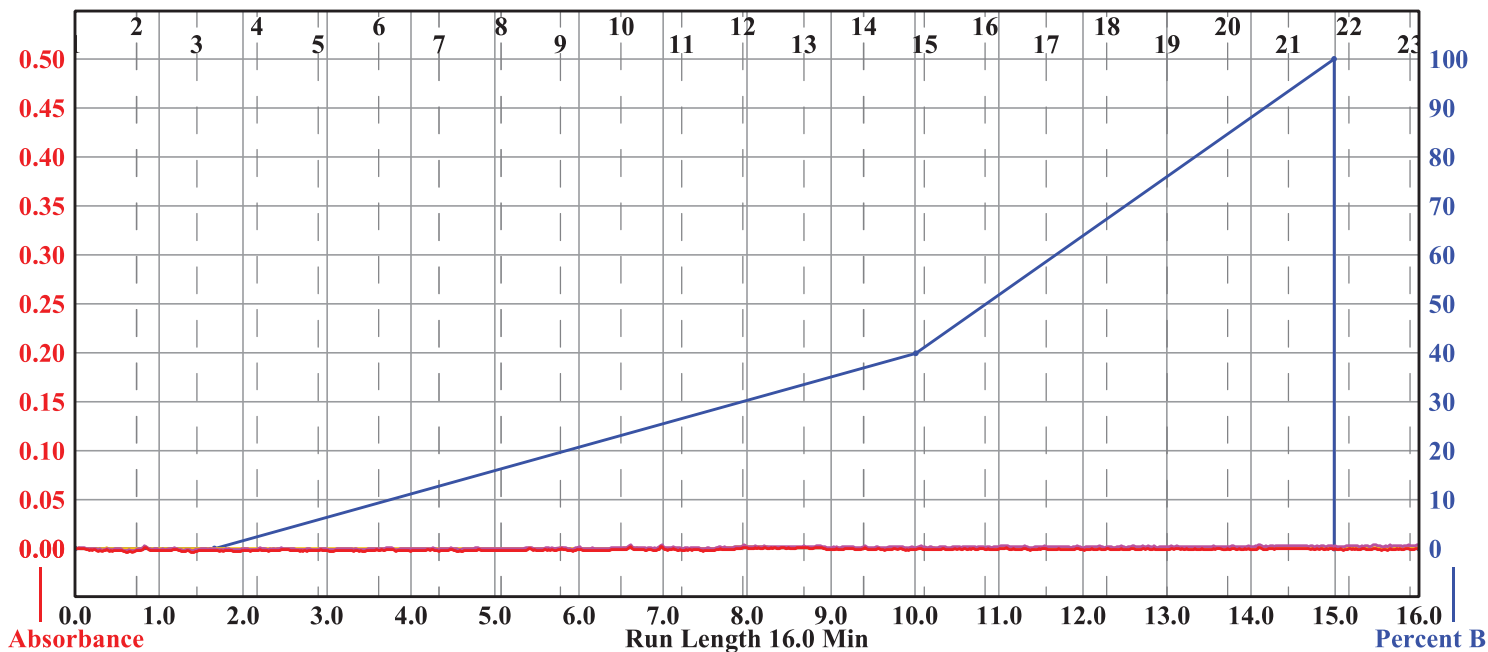

| Rack A |    |    |    |    | Peak # | Start Tube | End Tube |
|--------|----|----|----|----|--------|------------|----------|
| 71     | 72 | 73 | 74 | 75 |        |            |          |
| 70     | 69 | 68 | 67 | 66 |        |            |          |
| 61     | 62 | 63 | 64 | 65 |        |            |          |
| 60     | 59 | 58 | 57 | 56 |        |            |          |
| 51     | 52 | 53 | 54 | 55 |        |            |          |
| 50     | 49 | 48 | 47 | 46 |        |            |          |
| 41     | 42 | 43 | 44 | 45 |        |            |          |
| 40     | 39 | 38 | 37 | 36 |        |            |          |
| 31     | 32 | 33 | 34 | 35 |        |            |          |
| 30     | 29 | 28 | 27 | 26 |        |            |          |
| 21     | 22 | 23 | 24 | 25 |        |            |          |
| 20     | 19 | 18 | 17 | 16 |        |            |          |
| 11     | 12 | 13 | 14 | 15 |        |            |          |
| 10     | 9  | 8  | 7  | 6  |        |            |          |
| 1      | 2  | 3  | 4  | 5  |        |            |          |

  

| Duration | %B    | Solvent A | Solvent B   |
|----------|-------|-----------|-------------|
| 0.0      | 0.0   | A1 hexane | B2 methanol |
| 1.7      | 0.0   | A1 hexane | B2 methanol |
| 8.3      | 39.9  | A1 hexane | B2 methanol |
| 5.0      | 100.0 | A1 hexane | B2 methanol |
| 0.0      | 0.0   | A1 hexane | B2 methanol |
| 1.0      | 0.0   | A1 hexane | B2 methanol |

16 mm x 100 mm Tubes

Sample: JWC-FGF23-A-41

Peak Tube Volume: Max.

All Wavelength (orange): 200nm - 360nm

4x Column: 2

Non-Peak Tube Volume: Max.

Peak Width: 1 min

RediSep Column: Silica 12g Gold

Loading Type: Solid

Threshold: 0.20 AU

SN: E04150644DD628 Lot: 2622248050W

Wavelength 1 (red): 254nm

Peak Width: 1 min

Flow Rate: 30 ml/min

Threshold: 0.20 AU

Equilibration Volume: 100.8 ml

Wavelength 2 (purple): 280nm

Initial Waste: 0.0 ml

Air Purge: 10.0 min

Solvent: A1 hexane

Solvent: B2 methanol

Run Notes:

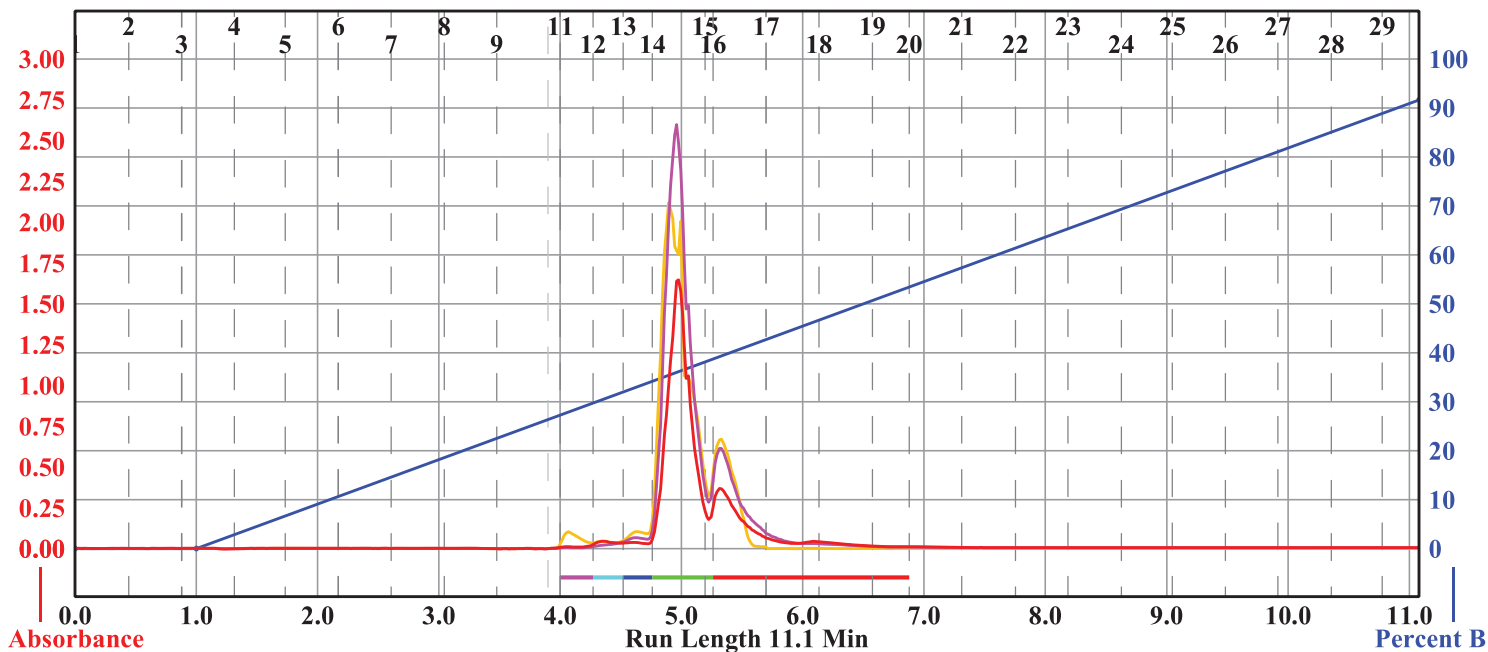

| Rack A |      |      |      |      | Peak # | Start Tube | End Tube |
|--------|------|------|------|------|--------|------------|----------|
| (71)   | (72) | (73) | (74) | (75) | 1      | A:11       | A:11     |
| (70)   | (69) | (68) | (67) | (66) | 2      | A:12       | A:12     |
| (61)   | (62) | (63) | (64) | (65) | 3      | A:13       | A:13     |
| (60)   | (59) | (58) | (57) | (56) | 4      | A:14       | A:15     |
| (51)   | (52) | (53) | (54) | (55) | 5      | A:16       | A:19     |
| (50)   | (49) | (48) | (47) | (46) |        |            |          |
| (41)   | (42) | (43) | (44) | (45) |        |            |          |
| (40)   | (39) | (38) | (37) | (36) |        |            |          |
| (31)   | (32) | (33) | (34) | (35) |        |            |          |
| (30)   | (29) | (28) | (27) | (26) |        |            |          |
| (21)   | (22) | (23) | (24) | (25) |        |            |          |
| (20)   | (19) | (18) | (17) | (16) |        |            |          |
| (11)   | (12) | (13) | (14) | (15) |        |            |          |
| (10)   | (9)  | (8)  | (7)  | (6)  |        |            |          |
| (1)    | (2)  | (3)  | (4)  | (5)  |        |            |          |

  

| Duration | %B   | Solvent A | Solvent B   |
|----------|------|-----------|-------------|
| 0.0      | 0.0  | A1 hexane | B2 methanol |
| 1.0      | 0.0  | A1 hexane | B2 methanol |
| 10.1     | 91.6 | A1 hexane | B2 methanol |

16 mm x 100 mm Tubes

Sample: JWC-FGF23-A-33

Peak Tube Volume: Max.

All Wavelength (orange): 200nm - 360nm

4x Column: 2

Non-Peak Tube Volume: Max.

Peak Width: 30 sec

RediSep Column: Al2O3 pH=7 8g

Loading Type: Solid

Threshold: 0.20 AU

Flow Rate: 18 ml/min

Wavelength 1 (red): 254nm

Peak Width: 30 sec

Equilibration Volume: 33.6 ml

Threshold: 0.20 AU

Initial Waste: 0.0 ml

Wavelength 2 (purple): 280nm

Air Purge: 10.0 min

Solvent: A1 hexane

Solvent: B2 methanol

Run Notes:

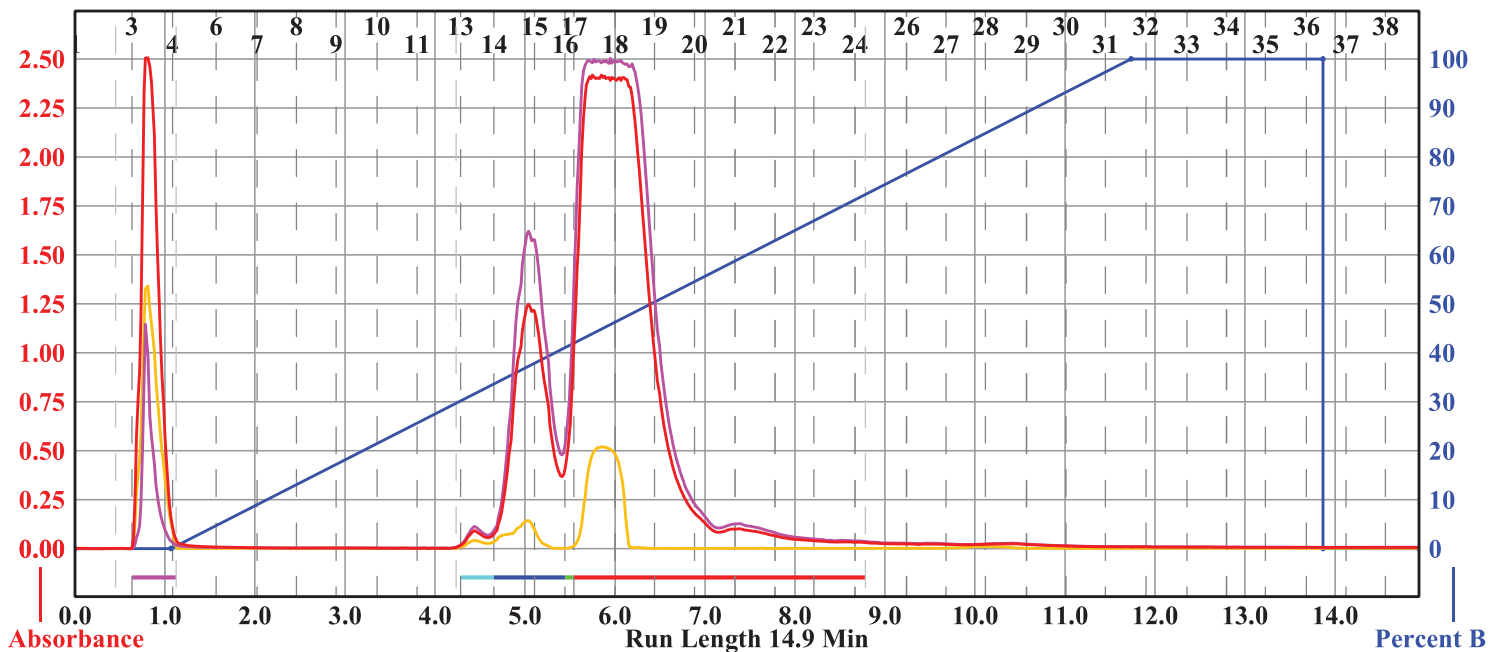

| Rack A |     |     |     |     |     | Peak # | Start Tube | End Tube |
|--------|-----|-----|-----|-----|-----|--------|------------|----------|
| 108    | 107 | 106 | 105 | 104 | 103 | 1      | A:3        | A:4      |
| 97     | 98  | 99  | 100 | 101 | 102 | 2      | A:13       | A:13     |
| 96     | 95  | 94  | 93  | 92  | 91  | 3      | A:14       | A:15     |
| 85     | 86  | 87  | 88  | 89  | 90  | 4      | A:16       | A:16     |
| 84     | 83  | 82  | 81  | 80  | 79  | 5      | A:17       | A:24     |
| 73     | 74  | 75  | 76  | 77  | 78  |        |            |          |
| 72     | 71  | 70  | 69  | 68  | 67  |        |            |          |
| 61     | 62  | 63  | 64  | 65  | 66  |        |            |          |
| 60     | 59  | 58  | 57  | 56  | 55  |        |            |          |
| 49     | 50  | 51  | 52  | 53  | 54  |        |            |          |
| 48     | 47  | 46  | 45  | 44  | 43  |        |            |          |
| 37     | 38  | 39  | 40  | 41  | 42  |        |            |          |
| 36     | 35  | 34  | 33  | 32  | 31  |        |            |          |
| 25     | 26  | 27  | 28  | 29  | 30  |        |            |          |
| 24     | 23  | 22  | 21  | 20  | 19  |        |            |          |
| 13     | 14  | 15  | 16  | 17  | 18  |        |            |          |
| 12     | 11  | 10  | 9   | 8   | 7   |        |            |          |
| 1      | 2   | 3   | 4   | 5   | 6   |        |            |          |

  

| Duration | %B    | Solvent A | Solvent B   |
|----------|-------|-----------|-------------|
| 0.0      | 0.0   | A1 hexane | B2 methanol |
| 1.1      | 0.0   | A1 hexane | B2 methanol |
| 10.7     | 100.0 | A1 hexane | B2 methanol |
| 2.1      | 100.0 | A1 hexane | B2 methanol |
| 0.0      | 0.0   | A1 hexane | B2 methanol |
| 1.1      | 0.0   | A1 hexane | B2 methanol |

13 mm x 100 mm Tubes



Sample: RPD-FGF23-A-103

Peak Tube Volume: Max.

All Wavelength (orange): 200nm - 360nm

4x Column: 1

Non-Peak Tube Volume: Max.

Peak Width: 30 sec

RediSep Column: Silica 4g

Loading Type: Solid

Threshold: 0.20 AU

Flow Rate: 18 ml/min

Wavelength 1 (red): 254nm

Peak Width: 30 sec

Equilibration Volume: 33.6 ml

Threshold: 0.20 AU

Initial Waste: 0.0 ml

Wavelength 2 (purple): 280nm

Air Purge: 2.8 min

Solvent: A1 hexane

Solvent: B2 methanol

Run Notes:

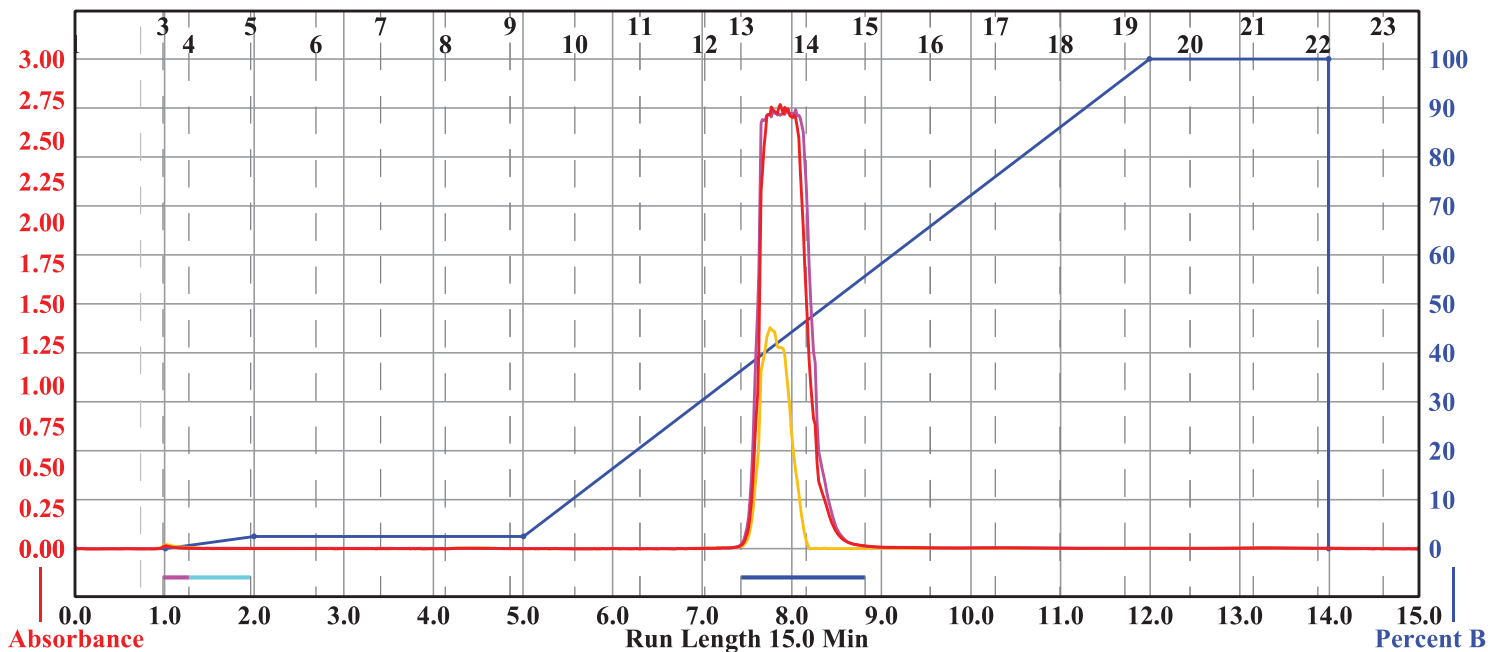

| Rack A |      |      |      |      | Peak #          | Start Tube | End Tube         |
|--------|------|------|------|------|-----------------|------------|------------------|
| (71)   | (72) | (73) | (74) | (75) | 1               | A:3        | A:3              |
| (70)   | (69) | (68) | (67) | (66) | 2               | A:4        | A:4              |
| (61)   | (62) | (63) | (64) | (65) | 3               | A:13       | A:14             |
| (60)   | (59) | (58) | (57) | (56) |                 |            |                  |
| (51)   | (52) | (53) | (54) | (55) |                 |            |                  |
| (50)   | (49) | (48) | (47) | (46) |                 |            |                  |
| (41)   | (42) | (43) | (44) | (45) |                 |            |                  |
| (40)   | (39) | (38) | (37) | (36) |                 |            |                  |
| (31)   | (32) | (33) | (34) | (35) | <b>Duration</b> | <b>%B</b>  | <b>Solvent A</b> |
| (30)   | (29) | (28) | (27) | (26) | 0.0             | 0.0        | A1 hexane        |
| (21)   | (22) | (23) | (24) | (25) | 1.0             | 0.0        | B2 methanol      |
| (20)   | (19) | (18) | (17) | (16) | 1.0             | 2.5        | A1 hexane        |
| (11)   | (12) | (13) | (14) | (15) | 3.0             | 2.5        | B2 methanol      |
| (10)   | (9)  | (8)  | (7)  | (6)  | 7.0             | 100.0      | A1 hexane        |
| (1)    | (2)  | (3)  | (4)  | (5)  | 2.0             | 100.0      | A1 hexane        |
|        |      |      |      |      | 0.0             | 0.0        | B2 methanol      |
|        |      |      |      |      | 1.0             | 0.0        | A1 hexane        |
|        |      |      |      |      |                 |            | B2 methanol      |

16 mm x 100 mm Tubes

Sample: JWC-FGF23-A-55

Peak Tube Volume: Max.

All Wavelength (orange): 200nm - 360nm

4x Column: 1

Non-Peak Tube Volume: Max.

Peak Width: 30 sec

RediSep Column: Silica 4g

Loading Type: Solid

Threshold: 0.20 AU

Flow Rate: 18 ml/min

Wavelength 1 (red): 254nm

Peak Width: 30 sec

Equilibration Volume: 33.6 ml

Threshold: 0.20 AU

Initial Waste: 0.0 ml

Wavelength 2 (purple): 280nm

Air Purge: 10.0 min

Solvent: A1 hexane

Solvent: B2 methanol

Run Notes:

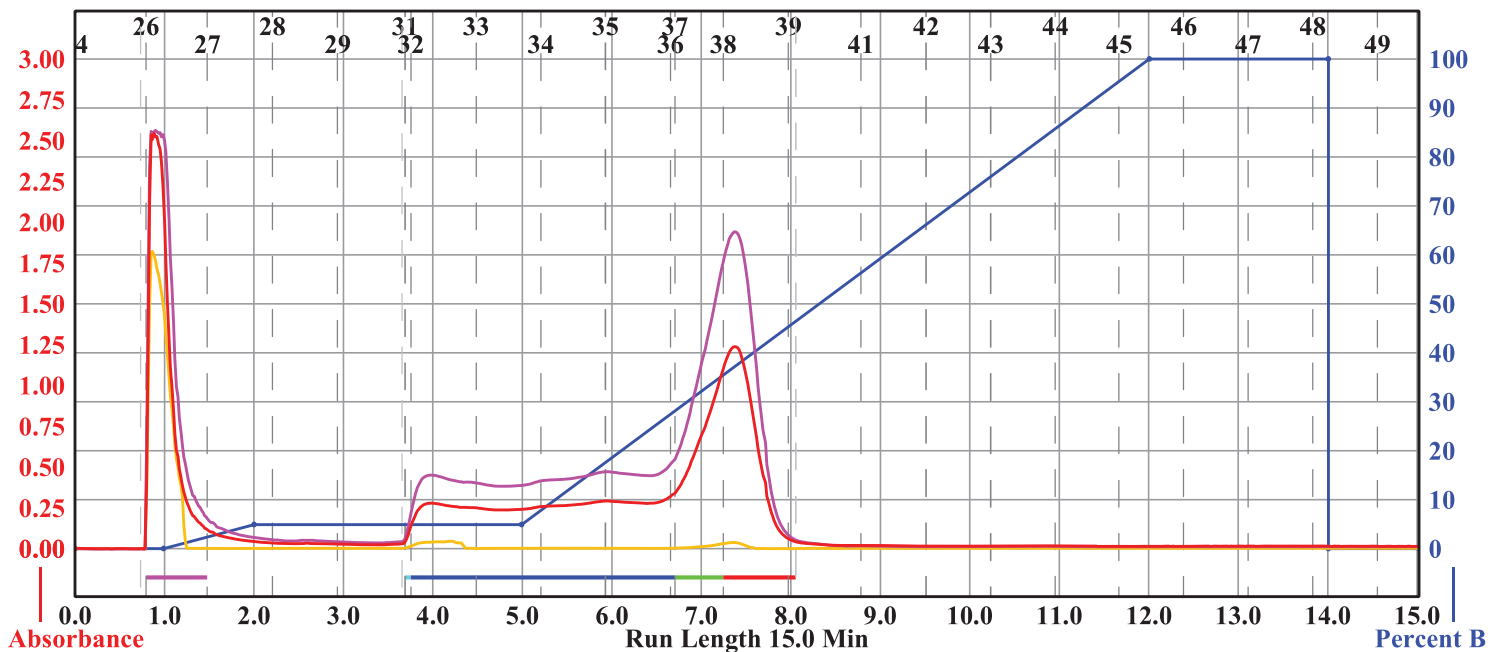

| Rack A |      |      |      |      | Peak # | Start Tube | End Tube |
|--------|------|------|------|------|--------|------------|----------|
| (71)   | (72) | (73) | (74) | (75) | 1      | A:26       | A:26     |
| (70)   | (69) | (68) | (67) | (66) | 2      | A:31       | A:31     |
| (61)   | (62) | (63) | (64) | (65) | 3      | A:32       | A:36     |
| (60)   | (59) | (58) | (57) | (56) | 4      | A:37       | A:37     |
| (51)   | (52) | (53) | (54) | (55) | 5      | A:38       | A:39     |
| (50)   | (49) | (48) | (47) | (46) |        |            |          |
| (41)   | (42) | (43) | (44) | (45) |        |            |          |
| (40)   | (39) | (38) | (37) | (36) |        |            |          |
| (31)   | (32) | (33) | (34) | (35) |        |            |          |
| (30)   | (29) | (28) | (27) | (26) |        |            |          |
| (21)   | (22) | (23) | (24) | (25) |        |            |          |
| (20)   | (19) | (18) | (17) | (16) |        |            |          |
| (11)   | (12) | (13) | (14) | (15) |        |            |          |
| (10)   | (9)  | (8)  | (7)  | (6)  |        |            |          |
| (1)    | (2)  | (3)  | (4)  | (5)  |        |            |          |

  

| Duration | %B    | Solvent A | Solvent B   |
|----------|-------|-----------|-------------|
| 0.0      | 0.0   | A1 hexane | B2 methanol |
| 1.0      | 0.0   | A1 hexane | B2 methanol |
| 1.0      | 4.9   | A1 hexane | B2 methanol |
| 3.0      | 4.9   | A1 hexane | B2 methanol |
| 7.0      | 100.0 | A1 hexane | B2 methanol |
| 2.0      | 100.0 | A1 hexane | B2 methanol |
| 0.0      | 0.0   | A1 hexane | B2 methanol |
| 1.0      | 0.0   | A1 hexane | B2 methanol |

16 mm x 100 mm Tubes

Sample: RPD-FGF23-A-99

Peak Tube Volume: Max.

All Wavelength (orange): 200nm - 360nm

4x Column: 1

Non-Peak Tube Volume: Max.

Peak Width: 30 sec

RediSep Column: Silica 4g

Loading Type: Solid

Threshold: 0.20 AU

Flow Rate: 18 ml/min

Wavelength 1 (red): 254nm

Peak Width: 30 sec

Equilibration Volume: 33.6 ml

Threshold: 0.20 AU

Initial Waste: 0.0 ml

Wavelength 2 (purple): 280nm

Air Purge: 10.0 min

Solvent: A1 hexane

Solvent: B2 methanol

Run Notes:

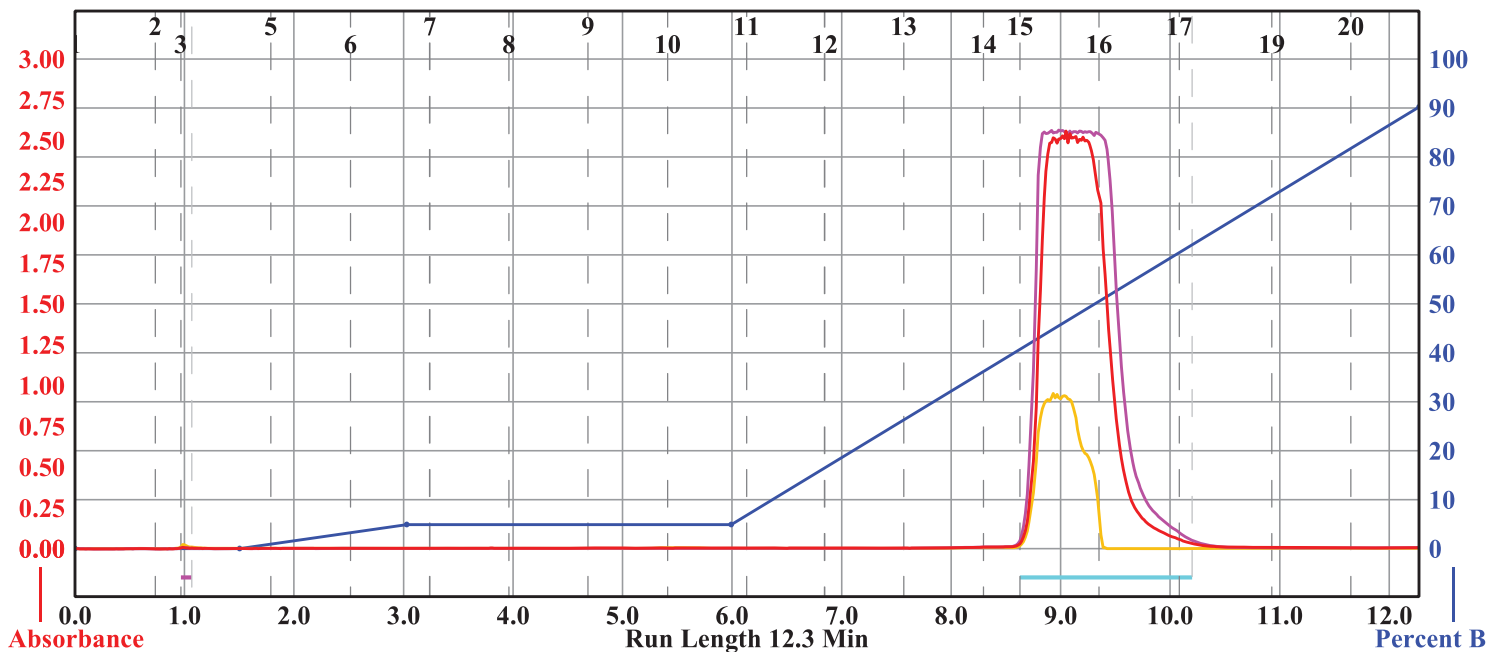

| Rack A |      |      |      |      | Peak #   | Start Tube | End Tube  |             |
|--------|------|------|------|------|----------|------------|-----------|-------------|
| (71)   | (72) | (73) | (74) | (75) | 1        | A:3        | A:3       |             |
| (70)   | (69) | (68) | (67) | (66) | 2        | A:15       | A:17      |             |
| (61)   | (62) | (63) | (64) | (65) |          |            |           |             |
| (60)   | (59) | (58) | (57) | (56) |          |            |           |             |
| (51)   | (52) | (53) | (54) | (55) |          |            |           |             |
| (50)   | (49) | (48) | (47) | (46) |          |            |           |             |
| (41)   | (42) | (43) | (44) | (45) |          |            |           |             |
| (40)   | (39) | (38) | (37) | (36) |          |            |           |             |
| (31)   | (32) | (33) | (34) | (35) | Duration | %B         | Solvent A | Solvent B   |
| (30)   | (29) | (28) | (27) | (26) | 0.0      | 0.0        | A1 hexane | B2 methanol |
| (21)   | (22) | (23) | (24) | (25) | 1.5      | 0.0        | A1 hexane | B2 methanol |
| (20)   | (19) | (18) | (17) | (16) | 1.5      | 4.9        | A1 hexane | B2 methanol |
| (11)   | (12) | (13) | (14) | (15) | 3.0      | 4.9        | A1 hexane | B2 methanol |
| (10)   | (9)  | (8)  | (7)  | (6)  | 6.3      | 90.2       | A1 hexane | B2 methanol |
| (1)    | (2)  | (3)  | (4)  | (5)  |          |            |           |             |

16 mm x 100 mm Tubes

Sample: RPD-FGF23-A-101

Peak Tube Volume: Max.

All Wavelength (orange): 200nm - 360nm

4x Column: 1

Non-Peak Tube Volume: Max.

Peak Width: 30 sec

RediSep Column: Silica 4g

Loading Type: Solid

Threshold: 0.20 AU

Flow Rate: 18 ml/min

Wavelength 1 (red): 254nm

Peak Width: 30 sec

Equilibration Volume: 33.6 ml

Threshold: 0.20 AU

Initial Waste: 0.0 ml

Wavelength 2 (purple): 280nm

Air Purge: 7.6 min

Solvent: A1 hexane

Solvent: B2 methanol

Run Notes:

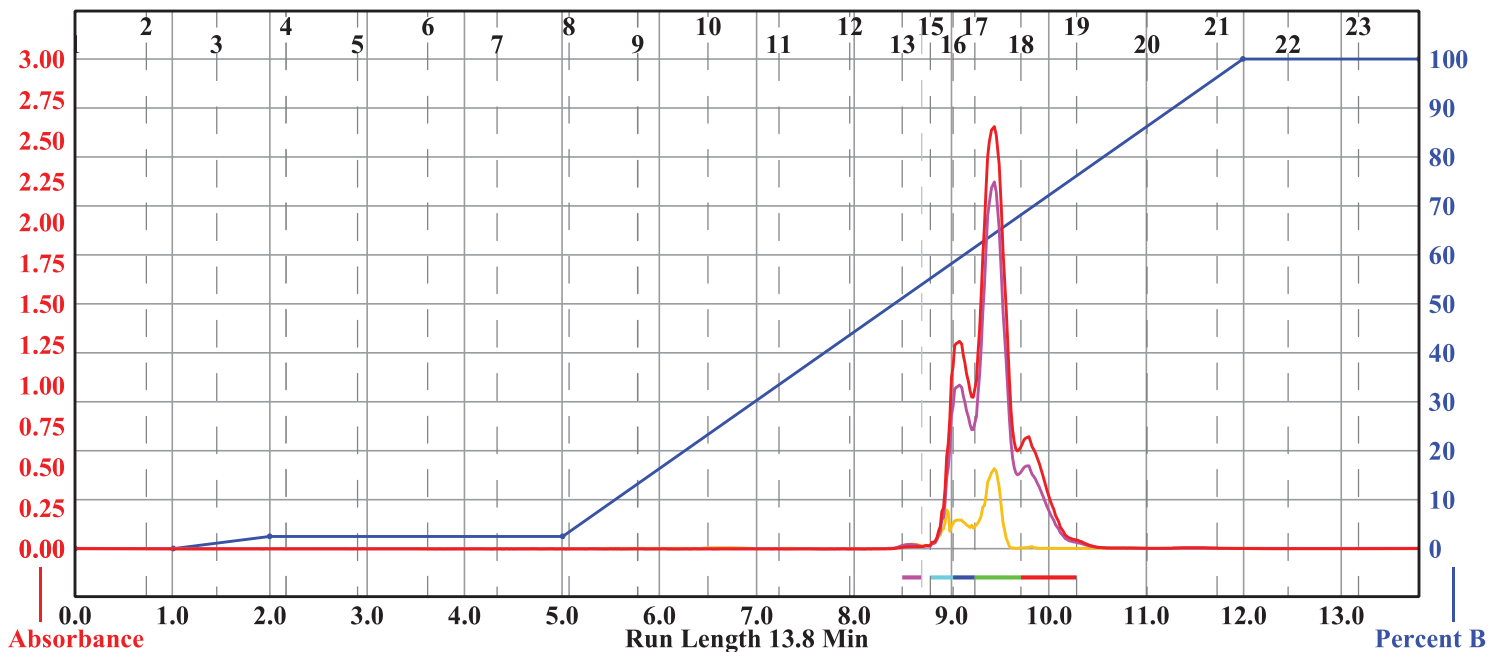

| Rack A |      |      |      |      | Peak # | Start Tube | End Tube |
|--------|------|------|------|------|--------|------------|----------|
| (71)   | (72) | (73) | (74) | (75) | 1      | A:13       | A:13     |
| (70)   | (69) | (68) | (67) | (66) | 2      | A:15       | A:15     |
| (61)   | (62) | (63) | (64) | (65) | 3      | A:16       | A:16     |
| (60)   | (59) | (58) | (57) | (56) | 4      | A:17       | A:17     |
| (51)   | (52) | (53) | (54) | (55) | 5      | A:18       | A:18     |
| (50)   | (49) | (48) | (47) | (46) |        |            |          |
| (41)   | (42) | (43) | (44) | (45) |        |            |          |
| (40)   | (39) | (38) | (37) | (36) |        |            |          |
| (31)   | (32) | (33) | (34) | (35) |        |            |          |
| (30)   | (29) | (28) | (27) | (26) |        |            |          |
| (21)   | (22) | (23) | (24) | (25) |        |            |          |
| (20)   | (19) | (18) | (17) | (16) |        |            |          |
| (11)   | (12) | (13) | (14) | (15) |        |            |          |
| (10)   | (9)  | (8)  | (7)  | (6)  |        |            |          |
| (1)    | (2)  | (3)  | (4)  | (5)  |        |            |          |

  

| Duration | %B    | Solvent A | Solvent B   |
|----------|-------|-----------|-------------|
| 0.0      | 0.0   | A1 hexane | B2 methanol |
| 1.0      | 0.0   | A1 hexane | B2 methanol |
| 1.0      | 2.5   | A1 hexane | B2 methanol |
| 3.0      | 2.5   | A1 hexane | B2 methanol |
| 7.0      | 100.0 | A1 hexane | B2 methanol |
| 1.8      | 100.0 | A1 hexane | B2 methanol |

16 mm x 100 mm Tubes

Sample: JWC-FGF23-45

Peak Tube Volume: Max.

All Wavelength (orange): 200nm - 360nm

4x Column: 1

Non-Peak Tube Volume: Max.

Peak Width: 30 sec

RediSep Column: Silica 4g

Loading Type: Solid

Threshold: 0.20 AU

Flow Rate: 18 ml/min

Wavelength 1 (red): 254nm

Peak Width: 30 sec

Equilibration Volume: 33.6 ml

Threshold: 0.20 AU

Initial Waste: 0.0 ml

Wavelength 2 (purple): 280nm

Air Purge: 10.0 min

Solvent: A1 hexane

Solvent: B1 ethyl acetate

Run Notes:

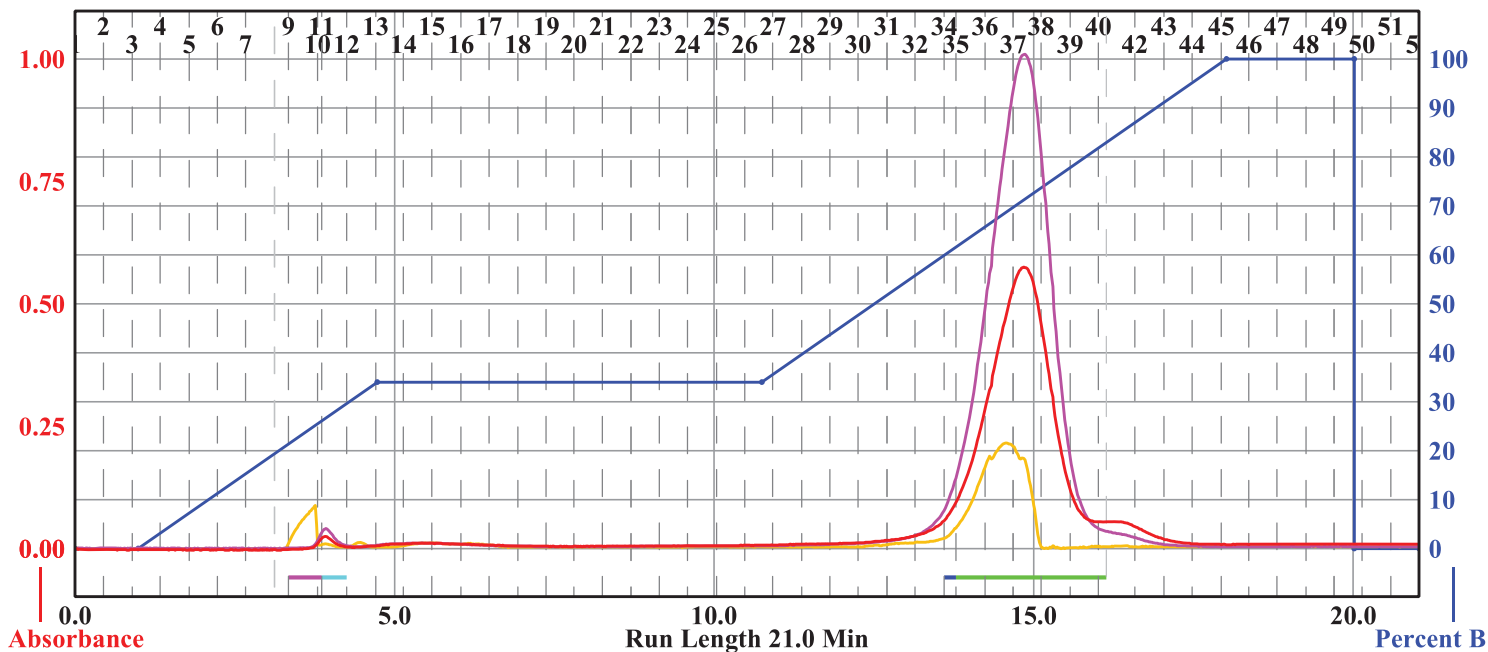

| Rack A |     |     |     |     |     |
|--------|-----|-----|-----|-----|-----|
| 108    | 107 | 106 | 105 | 104 | 103 |
| 97     | 98  | 99  | 100 | 101 | 102 |
| 96     | 95  | 94  | 93  | 92  | 91  |
| 85     | 86  | 87  | 88  | 89  | 90  |
| 84     | 83  | 82  | 81  | 80  | 79  |
| 73     | 74  | 75  | 76  | 77  | 78  |
| 72     | 71  | 70  | 69  | 68  | 67  |
| 61     | 62  | 63  | 64  | 65  | 66  |
| 60     | 59  | 58  | 57  | 56  | 55  |
| 49     | 50  | 51  | 52  | 53  | 54  |
| 48     | 47  | 46  | 45  | 44  | 43  |
| 37     | 38  | 39  | 40  | 41  | 42  |
| 36     | 35  | 34  | 33  | 32  | 31  |
| 25     | 26  | 27  | 28  | 29  | 30  |
| 24     | 23  | 22  | 21  | 20  | 19  |
| 13     | 14  | 15  | 16  | 17  | 18  |
| 12     | 11  | 10  | 9   | 8   | 7   |
| 1      | 2   | 3   | 4   | 5   | 6   |

| Peak # | Start Tube | End Tube |
|--------|------------|----------|
| 1      | A:9        | A:10     |
| 2      | A:11       | A:11     |
| 3      | A:34       | A:34     |
| 4      | A:35       | A:40     |

| Duration | %B    | Solvent A | Solvent B        |
|----------|-------|-----------|------------------|
| 0.0      | 0.0   | A1 hexane | B1 ethyl acetate |
| 1.0      | 0.0   | A1 hexane | B1 ethyl acetate |
| 3.7      | 34.0  | A1 hexane | B1 ethyl acetate |
| 6.0      | 34.0  | A1 hexane | B1 ethyl acetate |
| 7.3      | 100.0 | A1 hexane | B1 ethyl acetate |
| 2.0      | 100.0 | A1 hexane | B1 ethyl acetate |
| 0.0      | 0.0   | A1 hexane | B1 ethyl acetate |
| 1.0      | 0.0   | A1 hexane | B1 ethyl acetate |

13 mm x 100 mm Tubes

Sample: RPD-FGF23-A-105

Peak Tube Volume: Max.

All Wavelength (orange): 200nm - 360nm

4x Column: 2

Non-Peak Tube Volume: Max.

Peak Width: 30 sec

RediSep Column: Silica 4g

Loading Type: Solid

Threshold: 0.20 AU

Flow Rate: 18 ml/min

Wavelength 1 (red): 254nm

Peak Width: 30 sec

Equilibration Volume: 33.6 ml

Threshold: 0.20 AU

Initial Waste: 0.0 ml

Wavelength 2 (purple): 280nm

Air Purge: 10.0 min

Solvent: A1 hexane

Solvent: B2 methanol

Run Notes:

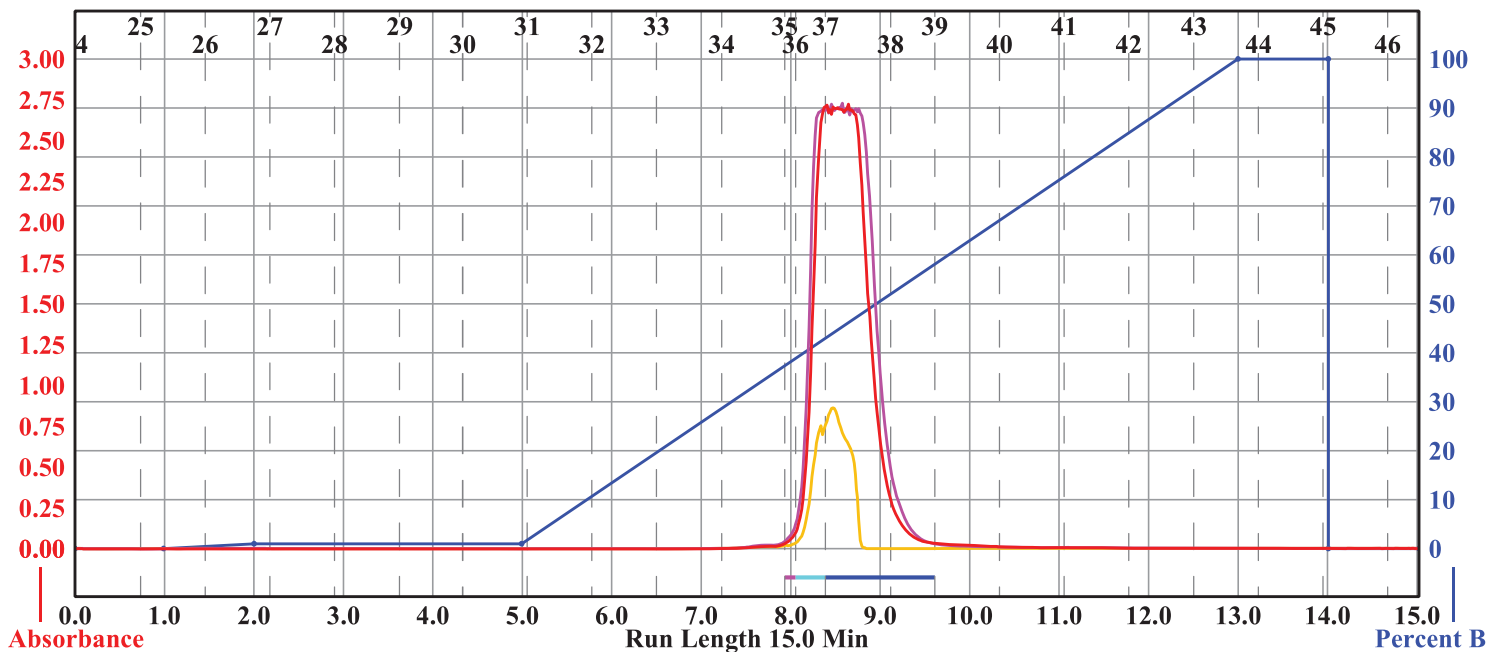

| Rack A |      |      |      |      | Peak #   | Start Tube | End Tube  |             |
|--------|------|------|------|------|----------|------------|-----------|-------------|
| (71)   | (72) | (73) | (74) | (75) | 1        | A:35       | A:35      |             |
| (70)   | (69) | (68) | (67) | (66) | 2        | A:36       | A:36      |             |
| (61)   | (62) | (63) | (64) | (65) | 3        | A:37       | A:38      |             |
| (60)   | (59) | (58) | (57) | (56) |          |            |           |             |
| (51)   | (52) | (53) | (54) | (55) |          |            |           |             |
| (50)   | (49) | (48) | (47) | (46) |          |            |           |             |
| (41)   | (42) | (43) | (44) | (45) |          |            |           |             |
| (40)   | (39) | (38) | (37) | (36) |          |            |           |             |
| (31)   | (32) | (33) | (34) | (35) | Duration | %B         | Solvent A | Solvent B   |
| (30)   | (29) | (28) | (27) | (26) | 0.0      | 0.0        | A1 hexane | B2 methanol |
| (21)   | (22) | (23) | (24) | (25) | 1.0      | 0.0        | A1 hexane | B2 methanol |
| (20)   | (19) | (18) | (17) | (16) | 1.0      | 1.0        | A1 hexane | B2 methanol |
| (11)   | (12) | (13) | (14) | (15) | 3.0      | 1.0        | A1 hexane | B2 methanol |
| (10)   | (9)  | (8)  | (7)  | (6)  | 8.0      | 100.0      | A1 hexane | B2 methanol |
| (1)    | (2)  | (3)  | (4)  | (5)  | 1.0      | 100.0      | A1 hexane | B2 methanol |
|        |      |      |      |      | 0.0      | 0.0        | A1 hexane | B2 methanol |
|        |      |      |      |      | 1.0      | 0.0        | A1 hexane | B2 methanol |

16 mm x 100 mm Tubes

Sample: JWC-FGF23-A-57

Peak Tube Volume: Max.

All Wavelength (orange): 200nm - 360nm

4x Column: 1

Non-Peak Tube Volume: Max.

Peak Width: 30 sec

RediSep Column: Silica 4g

Loading Type: Solid

Threshold: 0.20 AU

Flow Rate: 18 ml/min

Wavelength 1 (red): 254nm

Peak Width: 30 sec

Equilibration Volume: 33.6 ml

Threshold: 0.20 AU

Initial Waste: 0.0 ml

Wavelength 2 (purple): 280nm

Air Purge: 10.0 min

Solvent: A1 hexane

Solvent: B2 methanol

Run Notes:

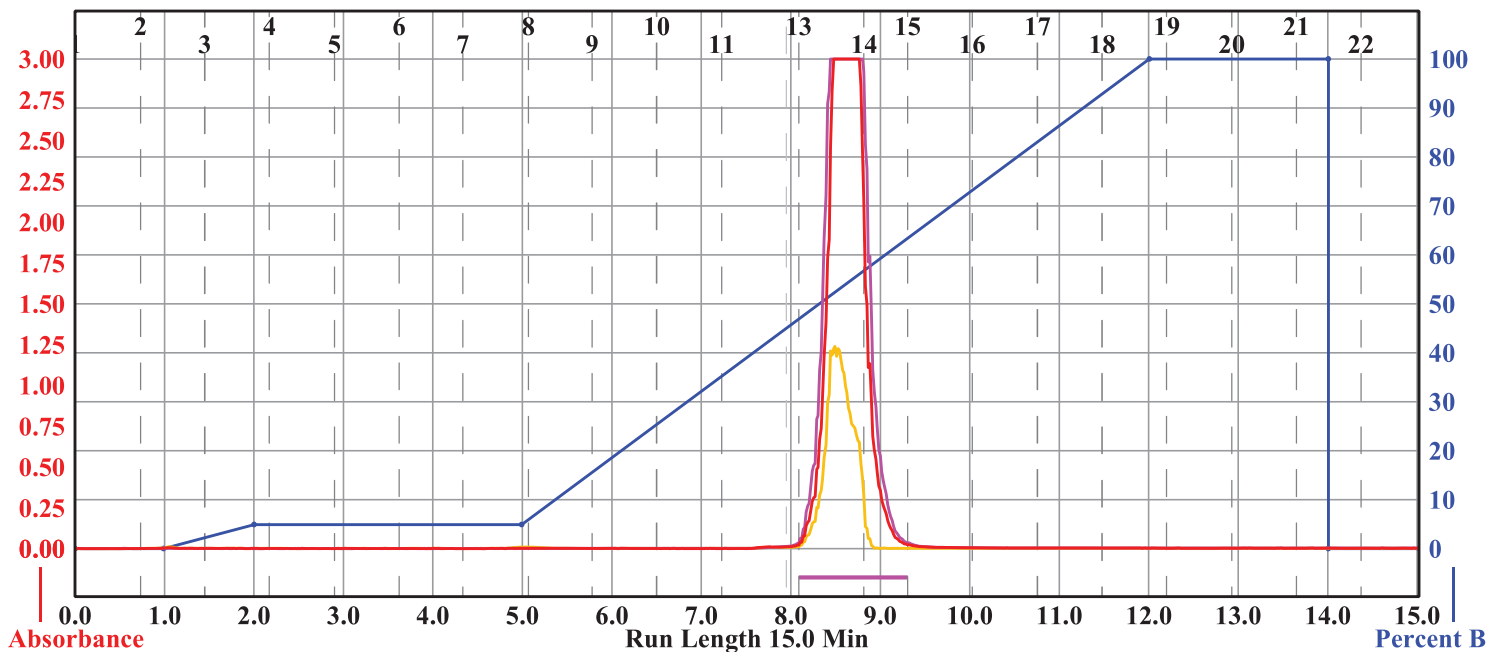

| Rack A |      |      |      |      | Peak # | Start Tube | End Tube |
|--------|------|------|------|------|--------|------------|----------|
| (71)   | (72) | (73) | (74) | (75) | 1      | A:13       | A:14     |
| (70)   | (69) | (68) | (67) | (66) |        |            |          |
| (61)   | (62) | (63) | (64) | (65) |        |            |          |
| (60)   | (59) | (58) | (57) | (56) |        |            |          |
| (51)   | (52) | (53) | (54) | (55) |        |            |          |
| (50)   | (49) | (48) | (47) | (46) |        |            |          |
| (41)   | (42) | (43) | (44) | (45) |        |            |          |
| (40)   | (39) | (38) | (37) | (36) |        |            |          |
| (31)   | (32) | (33) | (34) | (35) |        |            |          |
| (30)   | (29) | (28) | (27) | (26) |        |            |          |
| (21)   | (22) | (23) | (24) | (25) |        |            |          |
| (20)   | (19) | (18) | (17) | (16) |        |            |          |
| (11)   | (12) | (13) | (14) | (15) |        |            |          |
| (10)   | (9)  | (8)  | (7)  | (6)  |        |            |          |
| (1)    | (2)  | (3)  | (4)  | (5)  |        |            |          |

  

| Duration | %B    | Solvent A | Solvent B   |
|----------|-------|-----------|-------------|
| 0.0      | 0.0   | A1 hexane | B2 methanol |
| 1.0      | 0.0   | A1 hexane | B2 methanol |
| 1.0      | 4.9   | A1 hexane | B2 methanol |
| 3.0      | 4.9   | A1 hexane | B2 methanol |
| 7.0      | 100.0 | A1 hexane | B2 methanol |
| 2.0      | 100.0 | A1 hexane | B2 methanol |
| 0.0      | 0.0   | A1 hexane | B2 methanol |
| 1.0      | 0.0   | A1 hexane | B2 methanol |

16 mm x 100 mm Tubes

Sample: RPD-FGF23-A-37

Peak Tube Volume: Max.

All Wavelength (orange): 200nm - 360nm

4x Column: 2

Non-Peak Tube Volume: Max.

Peak Width: 30 sec

RediSep Column: Silica 4g

Loading Type: Solid

Threshold: 0.20 AU

Flow Rate: 18 ml/min

Wavelength 1 (red): 254nm

Peak Width: 30 sec

Equilibration Volume: 33.6 ml

Threshold: 0.20 AU

Initial Waste: 0.0 ml

Wavelength 2 (purple): 280nm

Air Purge: 5.0 min

Solvent: A1 hexane

Solvent: B2 methanol

Run Notes:

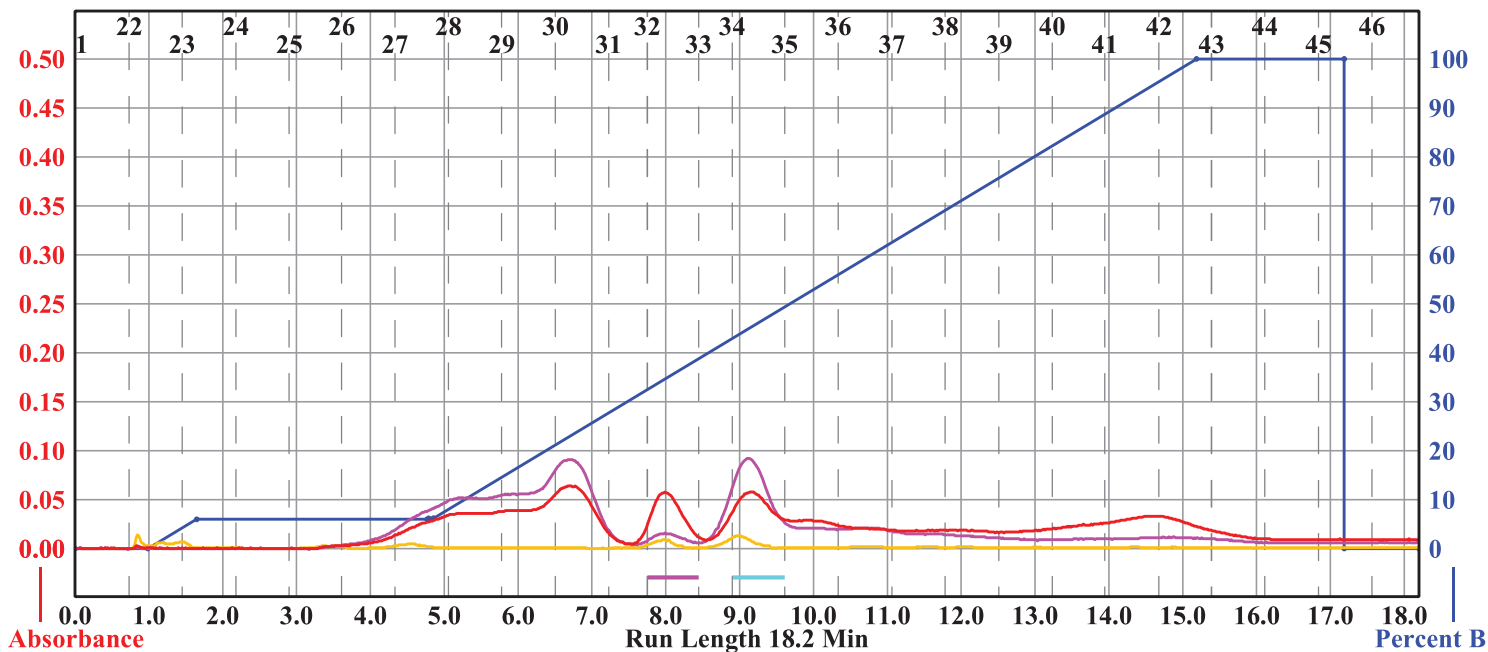

| Rack A |      |      |      |      | Peak #   | Start Tube | End Tube  |             |
|--------|------|------|------|------|----------|------------|-----------|-------------|
| (71)   | (72) | (73) | (74) | (75) | 1        | A:32       | A:32      |             |
| (70)   | (69) | (68) | (67) | (66) | 2        | A:34       | A:34      |             |
| (61)   | (62) | (63) | (64) | (65) |          |            |           |             |
| (60)   | (59) | (58) | (57) | (56) |          |            |           |             |
| (51)   | (52) | (53) | (54) | (55) |          |            |           |             |
| (50)   | (49) | (48) | (47) | (46) |          |            |           |             |
| (41)   | (42) | (43) | (44) | (45) |          |            |           |             |
| (40)   | (39) | (38) | (37) | (36) |          |            |           |             |
| (31)   | (32) | (33) | (34) | (35) | Duration | %B         | Solvent A | Solvent B   |
| (30)   | (29) | (28) | (27) | (26) | 0.0      | 0.0        | A1 hexane | B2 methanol |
| (21)   | (22) | (23) | (24) | (25) | 1.0      | 0.0        | A1 hexane | B2 methanol |
| (20)   | (19) | (18) | (17) | (16) | 0.7      | 6.0        | A1 hexane | B2 methanol |
| (11)   | (12) | (13) | (14) | (15) | 3.1      | 6.0        | A1 hexane | B2 methanol |
| (10)   | (9)  | (8)  | (7)  | (6)  | 0.0      | 6.2        | A1 hexane | B2 methanol |
| (1)    | (2)  | (3)  | (4)  | (5)  | 0.1      | 6.2        | A1 hexane | B2 methanol |
|        |      |      |      |      | 0.0      | 6.2        | A1 hexane | B2 methanol |
|        |      |      |      |      | 10.3     | 100.0      | A1 hexane | B2 methanol |
|        |      |      |      |      | 2.0      | 100.0      | A1 hexane | B2 methanol |
|        |      |      |      |      | 0.0      | 0.0        | A1 hexane | B2 methanol |
|        |      |      |      |      | 0.0      | 0.0        | A1 hexane | B2 methanol |

16 mm x 100 mm Tubes



Sample: JWC-FGF23-A-53

Peak Tube Volume: Max.

All Wavelength (orange): 200nm - 360nm

4x Column: 1

Non-Peak Tube Volume: Max.

Peak Width: 30 sec

RediSep Column: Silica 4g

Loading Type: Solid

Threshold: 0.20 AU

Flow Rate: 18 ml/min

Wavelength 1 (red): 254nm

Peak Width: 30 sec

Equilibration Volume: 33.6 ml

Threshold: 0.20 AU

Initial Waste: 0.0 ml

Wavelength 2 (purple): 280nm

Air Purge: 10.0 min

Solvent: A1 hexane

Solvent: B2 methanol

Run Notes:

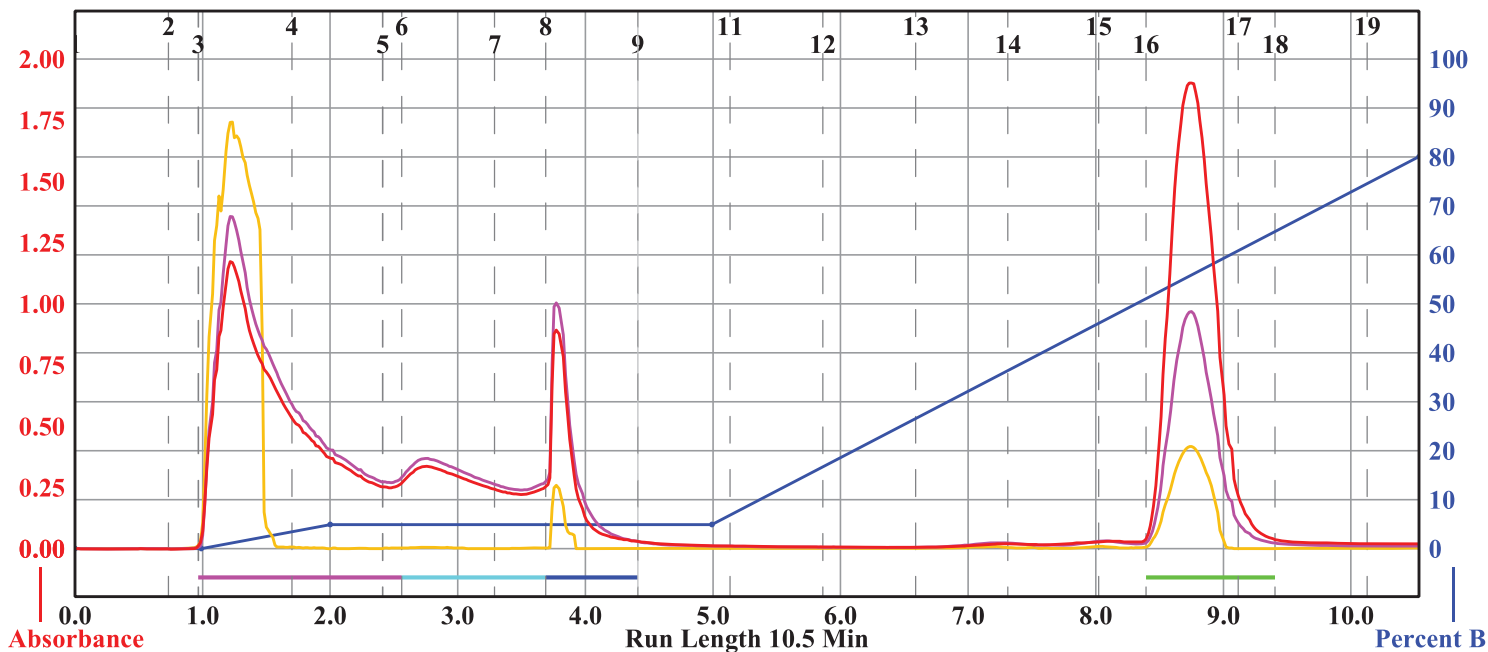

| Rack A |      |      |      |      | Peak # | Start Tube | End Tube |
|--------|------|------|------|------|--------|------------|----------|
| (71)   | (72) | (73) | (74) | (75) | 1      | A:3        | A:5      |
| (70)   | (69) | (68) | (67) | (66) | 2      | A:6        | A:7      |
| (61)   | (62) | (63) | (64) | (65) | 3      | A:8        | A:9      |
| (60)   | (59) | (58) | (57) | (56) | 4      | A:16       | A:17     |
| (51)   | (52) | (53) | (54) | (55) |        |            |          |
| (50)   | (49) | (48) | (47) | (46) |        |            |          |
| (41)   | (42) | (43) | (44) | (45) |        |            |          |
| (40)   | (39) | (38) | (37) | (36) |        |            |          |
| (31)   | (32) | (33) | (34) | (35) |        |            |          |
| (30)   | (29) | (28) | (27) | (26) |        |            |          |
| (21)   | (22) | (23) | (24) | (25) |        |            |          |
| (20)   | (19) | (18) | (17) | (16) |        |            |          |
| (11)   | (12) | (13) | (14) | (15) |        |            |          |
| (10)   | (9)  | (8)  | (7)  | (6)  |        |            |          |
| (1)    | (2)  | (3)  | (4)  | (5)  |        |            |          |

  

| Duration | %B   | Solvent A | Solvent B   |
|----------|------|-----------|-------------|
| 0.0      | 0.0  | A1 hexane | B2 methanol |
| 1.0      | 0.0  | A1 hexane | B2 methanol |
| 1.0      | 4.9  | A1 hexane | B2 methanol |
| 3.0      | 4.9  | A1 hexane | B2 methanol |
| 5.5      | 80.0 | A1 hexane | B2 methanol |

16 mm x 100 mm Tubes

Sample: RPD-FGF23-A-91

Peak Tube Volume: Max.

All Wavelength (orange): 200nm - 360nm

4x Column: 2

Non-Peak Tube Volume: Max.

Peak Width: 30 sec

RediSep Column: Silica 4g

Loading Type: Solid

Threshold: 0.20 AU

Flow Rate: 18 ml/min

Wavelength 1 (red): 254nm

Peak Width: 30 sec

Equilibration Volume: 33.6 ml

Threshold: 0.20 AU

Initial Waste: 0.0 ml

Wavelength 2 (purple): 280nm

Air Purge: 5.0 min

Solvent: A1 hexane

Solvent: B2 methanol

Run Notes:

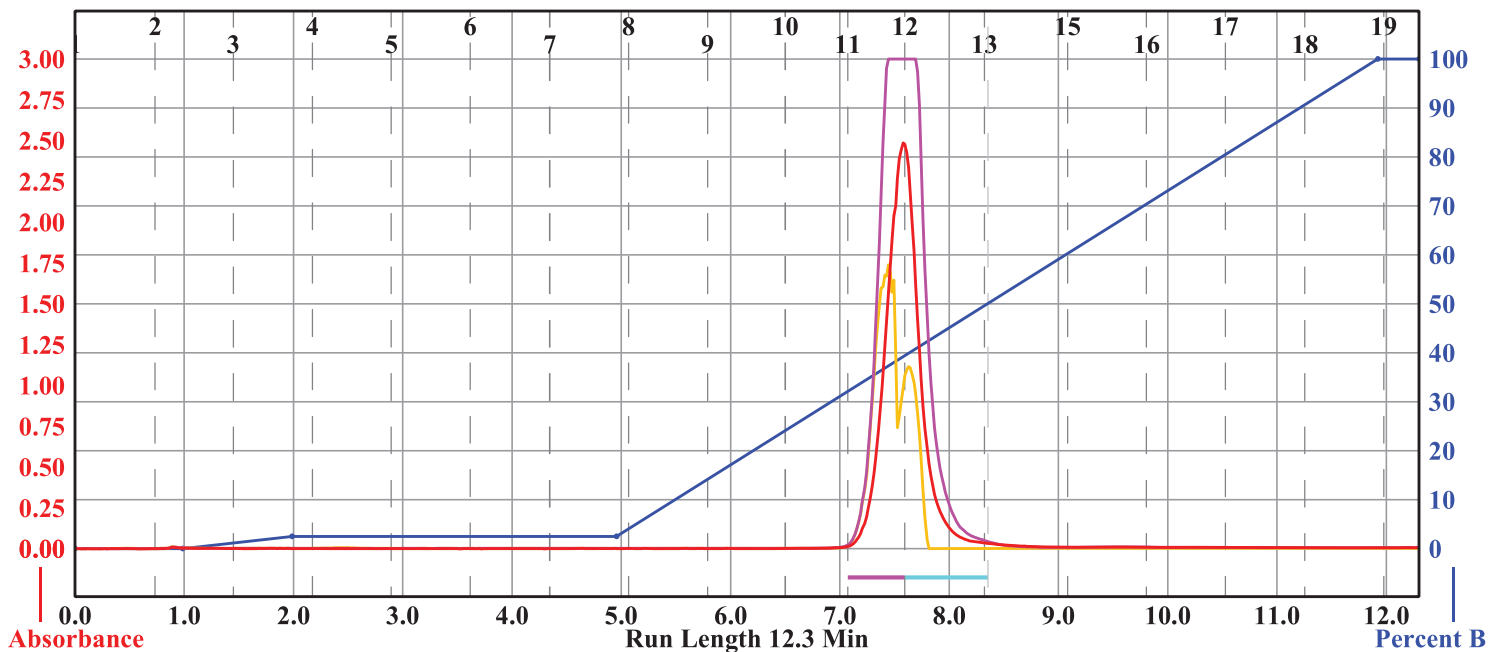

| Rack A |    |    |    |    | Peak # | Start Tube | End Tube |
|--------|----|----|----|----|--------|------------|----------|
| 71     | 72 | 73 | 74 | 75 | 1      | A:11       | A:11     |
| 70     | 69 | 68 | 67 | 66 | 2      | A:12       | A:13     |
| 61     | 62 | 63 | 64 | 65 |        |            |          |
| 60     | 59 | 58 | 57 | 56 |        |            |          |
| 51     | 52 | 53 | 54 | 55 |        |            |          |
| 50     | 49 | 48 | 47 | 46 |        |            |          |
| 41     | 42 | 43 | 44 | 45 |        |            |          |
| 40     | 39 | 38 | 37 | 36 |        |            |          |
| 31     | 32 | 33 | 34 | 35 |        |            |          |
| 30     | 29 | 28 | 27 | 26 |        |            |          |
| 21     | 22 | 23 | 24 | 25 |        |            |          |
| 20     | 19 | 18 | 17 | 16 |        |            |          |
| 11     | 12 | 13 | 14 | 15 |        |            |          |
| 10     | 9  | 8  | 7  | 6  |        |            |          |
| 1      | 2  | 3  | 4  | 5  |        |            |          |

  

| Duration | %B    | Solvent A | Solvent B   |
|----------|-------|-----------|-------------|
| 0.0      | 0.0   | A1 hexane | B2 methanol |
| 1.0      | 0.0   | A1 hexane | B2 methanol |
| 1.0      | 2.5   | A1 hexane | B2 methanol |
| 3.0      | 2.5   | A1 hexane | B2 methanol |
| 7.0      | 100.0 | A1 hexane | B2 methanol |
| 0.4      | 100.0 | A1 hexane | B2 methanol |

16 mm x 100 mm Tubes

Sample: RPD-FGF23-A-93.2.

Peak Tube Volume: Max.

All Wavelength (orange): 200nm - 360nm

4x Column: 2

Non-Peak Tube Volume: Max.

Peak Width: 30 sec

RediSep Column: Silica 4g

Loading Type: Solid

Threshold: 0.20 AU

Flow Rate: 18 ml/min

Wavelength 1 (red): 254nm

Peak Width: 30 sec

Equilibration Volume: 33.6 ml

Threshold: 0.20 AU

Initial Waste: 0.0 ml

Wavelength 2 (purple): 280nm

Air Purge: 5.0 min

Solvent: A1 hexane

Solvent: B2 methanol

Run Notes:

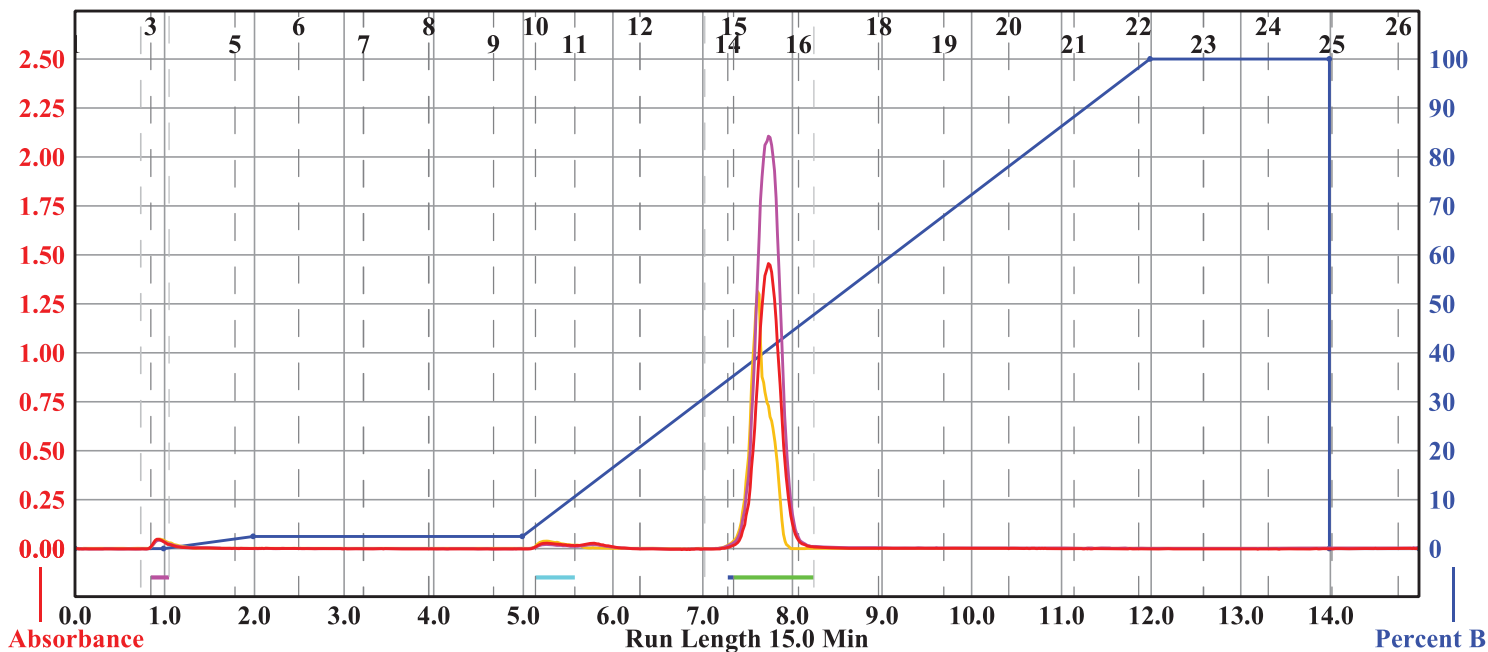

| Rack A |      |      |      |      | Peak # | Start Tube | End Tube |
|--------|------|------|------|------|--------|------------|----------|
| (71)   | (72) | (73) | (74) | (75) | 1      | A:3        | A:3      |
| (70)   | (69) | (68) | (67) | (66) | 2      | A:10       | A:10     |
| (61)   | (62) | (63) | (64) | (65) | 3      | A:14       | A:14     |
| (60)   | (59) | (58) | (57) | (56) | 4      | A:15       | A:16     |
| (51)   | (52) | (53) | (54) | (55) |        |            |          |
| (50)   | (49) | (48) | (47) | (46) |        |            |          |
| (41)   | (42) | (43) | (44) | (45) |        |            |          |
| (40)   | (39) | (38) | (37) | (36) |        |            |          |
| (31)   | (32) | (33) | (34) | (35) |        |            |          |
| (30)   | (29) | (28) | (27) | (26) |        |            |          |
| (21)   | (22) | (23) | (24) | (25) |        |            |          |
| (20)   | (19) | (18) | (17) | (16) |        |            |          |
| (11)   | (12) | (13) | (14) | (15) |        |            |          |
| (10)   | (9)  | (8)  | (7)  | (6)  |        |            |          |
| (1)    | (2)  | (3)  | (4)  | (5)  |        |            |          |

  

| Duration | %B    | Solvent A | Solvent B   |
|----------|-------|-----------|-------------|
| 0.0      | 0.0   | A1 hexane | B2 methanol |
| 1.0      | 0.0   | A1 hexane | B2 methanol |
| 1.0      | 2.5   | A1 hexane | B2 methanol |
| 3.0      | 2.5   | A1 hexane | B2 methanol |
| 7.0      | 100.0 | A1 hexane | B2 methanol |
| 2.0      | 100.0 | A1 hexane | B2 methanol |
| 0.0      | 0.0   | A1 hexane | B2 methanol |
| 1.0      | 0.0   | A1 hexane | B2 methanol |

16 mm x 100 mm Tubes

Sample: moi-a-17\_3

Peak Tube Volume: Max.

All Wavelength (orange): 200nm - 360nm

4x Column: 2

Non-Peak Tube Volume: Max.

Peak Width: 30 sec

RediSep Column: Silica 4g

Loading Type: Solid

Threshold: 0.20 AU

Flow Rate: 18 ml/min

Wavelength 1 (red): 254nm

Peak Width: 30 sec

Equilibration Volume: 33.6 ml

Threshold: 0.20 AU

Initial Waste: 0.0 ml

Wavelength 2 (purple): 280nm

Air Purge: 10.0 min

Solvent: A1 hexane

Solvent: B2 methanol

Run Notes:

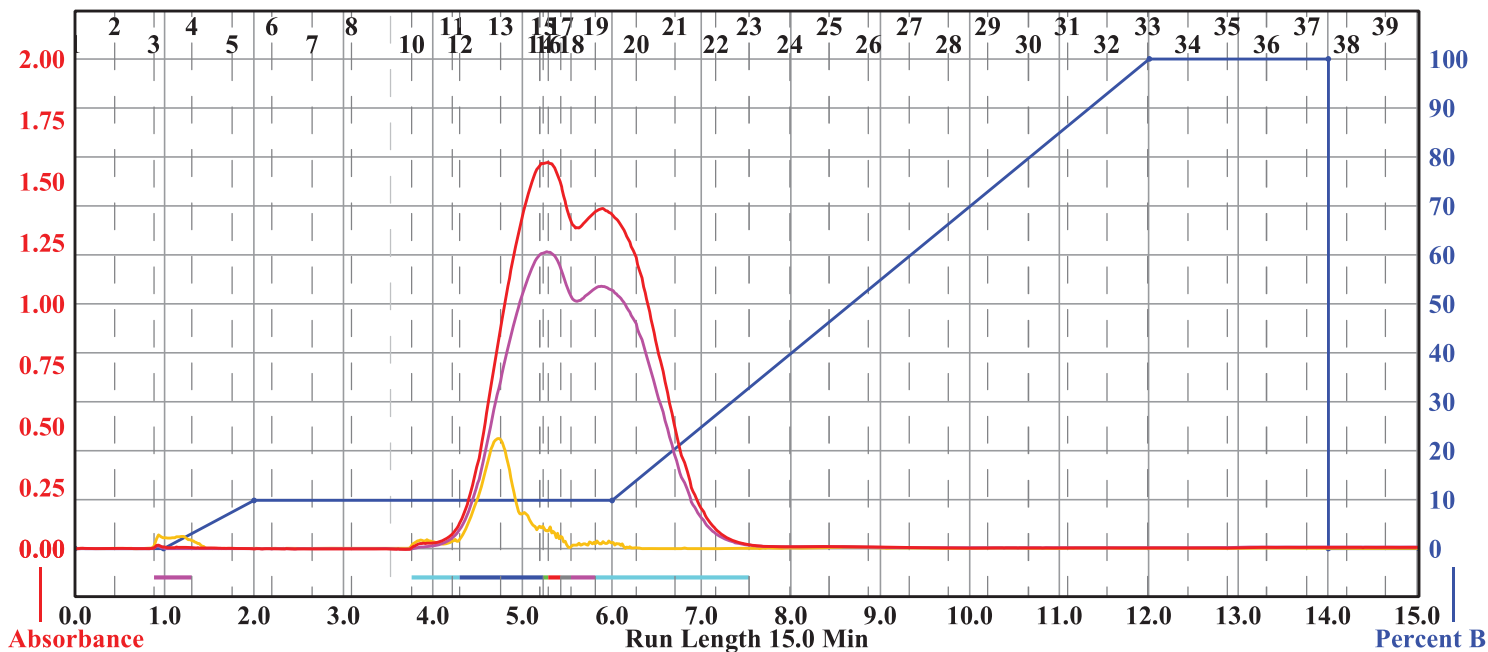

| Rack A |     |     |     |     |     |
|--------|-----|-----|-----|-----|-----|
| 108    | 107 | 106 | 105 | 104 | 103 |
| 97     | 98  | 99  | 100 | 101 | 102 |
| 96     | 95  | 94  | 93  | 92  | 91  |
| 85     | 86  | 87  | 88  | 89  | 90  |
| 84     | 83  | 82  | 81  | 80  | 79  |
| 73     | 74  | 75  | 76  | 77  | 78  |
| 72     | 71  | 70  | 69  | 68  | 67  |
| 61     | 62  | 63  | 64  | 65  | 66  |
| 60     | 59  | 58  | 57  | 56  | 55  |
| 49     | 50  | 51  | 52  | 53  | 54  |
| 48     | 47  | 46  | 45  | 44  | 43  |
| 37     | 38  | 39  | 40  | 41  | 42  |
| 36     | 35  | 34  | 33  | 32  | 31  |
| 25     | 26  | 27  | 28  | 29  | 30  |
| 24     | 23  | 22  | 21  | 20  | 19  |
| 13     | 12  | 11  | 10  | 9   | 8   |
| 12     | 11  | 10  | 9   | 8   | 7   |
| 1      | 2   | 3   | 4   | 5   | 6   |

| Peak # | Start Tube | End Tube |
|--------|------------|----------|
| 1      | A:3        | A:3      |
| 2      | A:10       | A:11     |
| 3      | A:12       | A:14     |
| 4      | A:15       | A:15     |
| 5      | A:16       | A:16     |
| 6      | A:17       | A:17     |
| 7      | A:18       | A:18     |
| 8      | A:19       | A:22     |

| Duration | %B    | Solvent A | Solvent B   |
|----------|-------|-----------|-------------|
| 0.0      | 0.0   | A1 hexane | B2 methanol |
| 1.0      | 0.0   | A1 hexane | B2 methanol |
| 1.0      | 9.9   | A1 hexane | B2 methanol |
| 4.0      | 9.9   | A1 hexane | B2 methanol |
| 6.0      | 100.0 | A1 hexane | B2 methanol |
| 2.0      | 100.0 | A1 hexane | B2 methanol |
| 0.0      | 0.0   | A1 hexane | B2 methanol |
| 1.0      | 0.0   | A1 hexane | B2 methanol |

13 mm x 100 mm Tubes

Sample: moi-a-21

Peak Tube Volume: Max.

All Wavelength (orange): 200nm - 360nm

4x Column: 2

Non-Peak Tube Volume: Max.

Peak Width: 30 sec

RediSep Column: Silica 4g

Loading Type: Solid

Threshold: 0.20 AU

Flow Rate: 18 ml/min

Wavelength 1 (red): 254nm

Peak Width: 30 sec

Equilibration Volume: 33.6 ml

Threshold: 0.20 AU

Initial Waste: 0.0 ml

Wavelength 2 (purple): 280nm

Air Purge: 10.0 min

Solvent: A1 hexane

Solvent: B2 methanol

Run Notes:

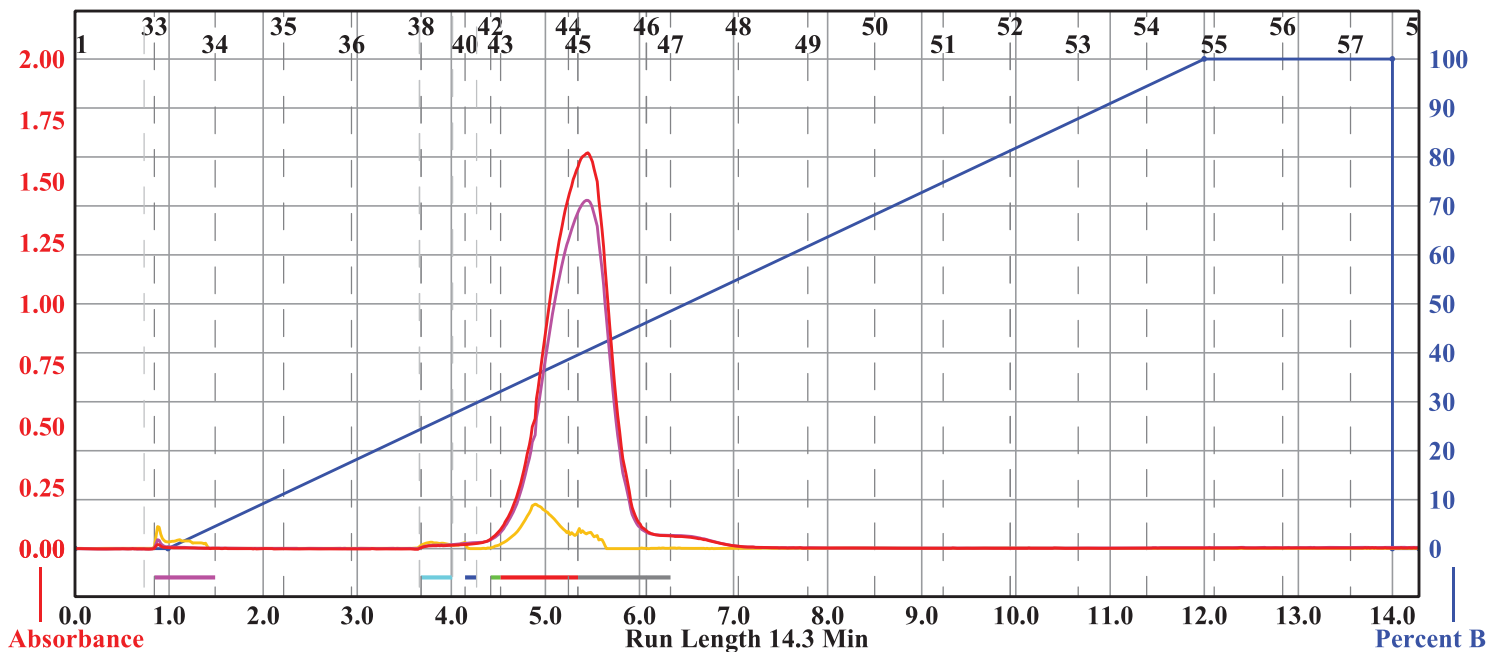

| Rack A |    |    |    |    | Peak # | Start Tube | End Tube |
|--------|----|----|----|----|--------|------------|----------|
| 71     | 72 | 73 | 74 | 75 | 1      | A:33       | A:33     |
| 70     | 69 | 68 | 67 | 66 | 2      | A:38       | A:38     |
| 61     | 62 | 63 | 64 | 65 | 3      | A:40       | A:40     |
| 60     | 59 | 58 | 57 | 56 | 4      | A:42       | A:42     |
| 51     | 52 | 53 | 54 | 55 | 5      | A:43       | A:44     |
| 50     | 49 | 48 | 47 | 46 | 6      | A:45       | A:46     |
| 41     | 42 | 43 | 44 | 45 |        |            |          |
| 40     | 39 | 38 | 37 | 36 |        |            |          |
| 31     | 32 | 33 | 34 | 35 |        |            |          |
| 30     | 29 | 28 | 27 | 26 |        |            |          |
| 21     | 22 | 23 | 24 | 25 |        |            |          |
| 20     | 19 | 18 | 17 | 16 |        |            |          |
| 11     | 12 | 13 | 14 | 15 |        |            |          |
| 10     | 9  | 8  | 7  | 6  |        |            |          |
| 1      | 2  | 3  | 4  | 5  |        |            |          |

  

| Duration | %B    | Solvent A | Solvent B   |
|----------|-------|-----------|-------------|
| 0.0      | 0.0   | A1 hexane | B2 methanol |
| 1.0      | 0.0   | A1 hexane | B2 methanol |
| 11.0     | 100.0 | A1 hexane | B2 methanol |
| 2.0      | 100.0 | A1 hexane | B2 methanol |
| 0.0      | 0.0   | A1 hexane | B2 methanol |
| 0.3      | 0.0   | A1 hexane | B2 methanol |

16 mm x 100 mm Tubes

Sample: MoI-A-71-2

Peak Tube Volume: Max.

All Wavelength (orange): 200nm - 360nm

4x Column: 1

Non-Peak Tube Volume: Max.

Peak Width: 30 sec

RediSep Column: Silica 4g

Loading Type: Solid

Threshold: 0.20 AU

Flow Rate: 18 ml/min

Wavelength 1 (red): 254nm

Peak Width: 30 sec

Equilibration Volume: 33.6 ml

Threshold: 0.20 AU

Initial Waste: 0.0 ml

Wavelength 2 (purple): 280nm

Air Purge: 1.1 min

Solvent: A1 hexane

Solvent: B2 methanol

Run Notes:

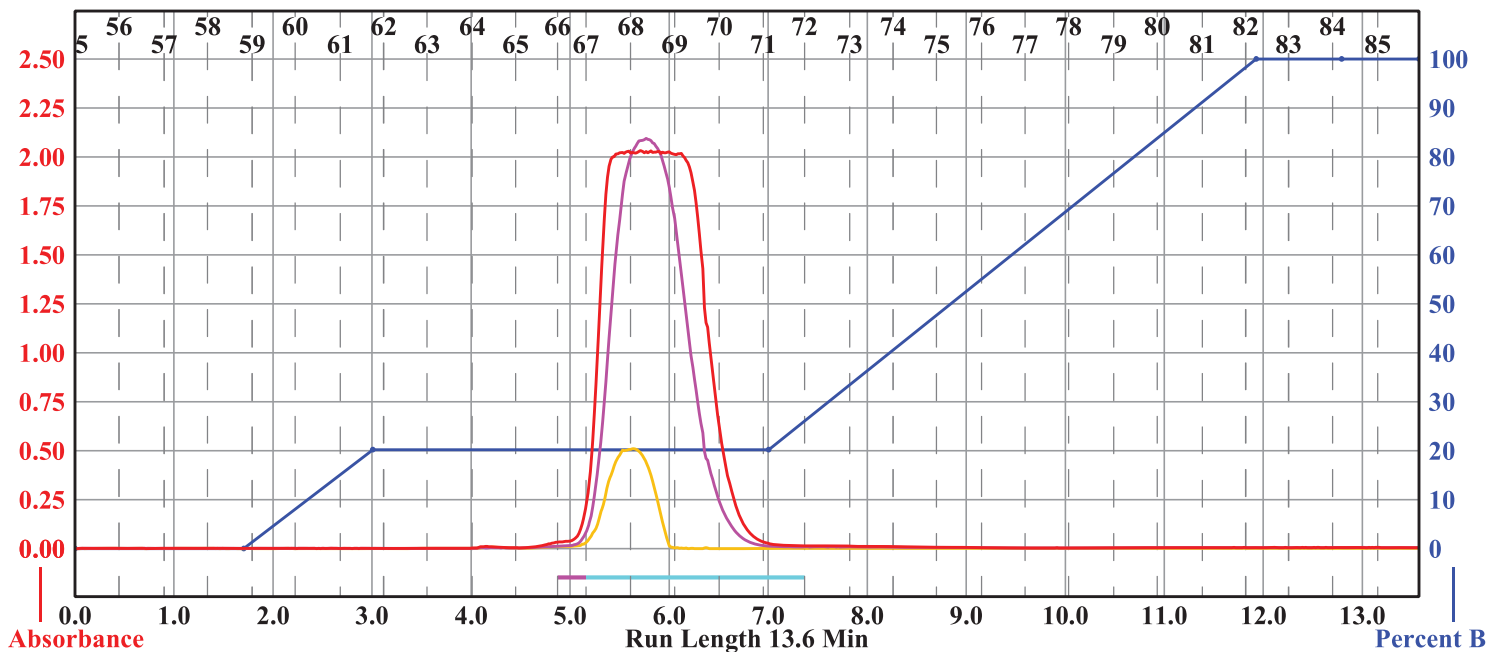

| Rack A |     |     |     |     |     | Peak # | Start Tube | End Tube |
|--------|-----|-----|-----|-----|-----|--------|------------|----------|
| 108    | 107 | 106 | 105 | 104 | 103 | 1      | A:66       | A:66     |
| 97     | 98  | 99  | 100 | 101 | 102 |        | 2          | A:67     |
| 96     | 95  | 94  | 93  | 92  | 91  |        |            |          |
| 85     | 86  | 87  | 88  | 89  | 90  |        |            |          |
| 84     | 83  | 82  | 81  | 80  | 79  |        |            |          |
| 73     | 74  | 75  | 76  | 77  | 78  |        |            |          |
| 72     | 71  | 70  | 69  | 68  | 67  |        |            |          |
| 61     | 62  | 63  | 64  | 65  | 66  |        |            |          |
| 60     | 59  | 58  | 57  | 56  | 55  |        |            |          |
| 49     | 50  | 51  | 52  | 53  | 54  |        |            |          |
| 48     | 47  | 46  | 45  | 44  | 43  |        |            |          |
| 37     | 38  | 39  | 40  | 41  | 42  |        |            |          |
| 36     | 35  | 34  | 33  | 32  | 31  |        |            |          |
| 25     | 26  | 27  | 28  | 29  | 30  |        |            |          |
| 24     | 23  | 22  | 21  | 20  | 19  |        |            |          |
| 13     | 14  | 15  | 16  | 17  | 18  |        |            |          |
| 12     | 11  | 10  | 9   | 8   | 7   |        |            |          |
| 1      | 2   | 3   | 4   | 5   | 6   |        |            |          |

  

| Duration | %B    | Solvent A | Solvent B   |
|----------|-------|-----------|-------------|
| 0.0      | 0.0   | A1 hexane | B2 methanol |
| 1.7      | 0.0   | A1 hexane | B2 methanol |
| 1.3      | 20.2  | A1 hexane | B2 methanol |
| 4.0      | 20.2  | A1 hexane | B2 methanol |
| 4.9      | 100.0 | A1 hexane | B2 methanol |
| 0.9      | 100.0 | A1 hexane | B2 methanol |
| 0.8      | 100.0 | A1 hexane | B2 methanol |

13 mm x 100 mm Tubes

Sample: MOI-A-69-2

Peak Tube Volume: Max.

All Wavelength (orange): 200nm - 360nm

4x Column: 1

Non-Peak Tube Volume: Max.

Peak Width: 30 sec

RediSep Column: Silica 4g

Loading Type: Solid

Threshold: 0.20 AU

Flow Rate: 18 ml/min

Wavelength 1 (red): 254nm

Peak Width: 30 sec

Equilibration Volume: 33.6 ml

Threshold: 0.20 AU

Initial Waste: 0.0 ml

Wavelength 2 (purple): 280nm

Air Purge: 10.0 min

Solvent: A1 hexane

Solvent: B2 methanol

Run Notes:

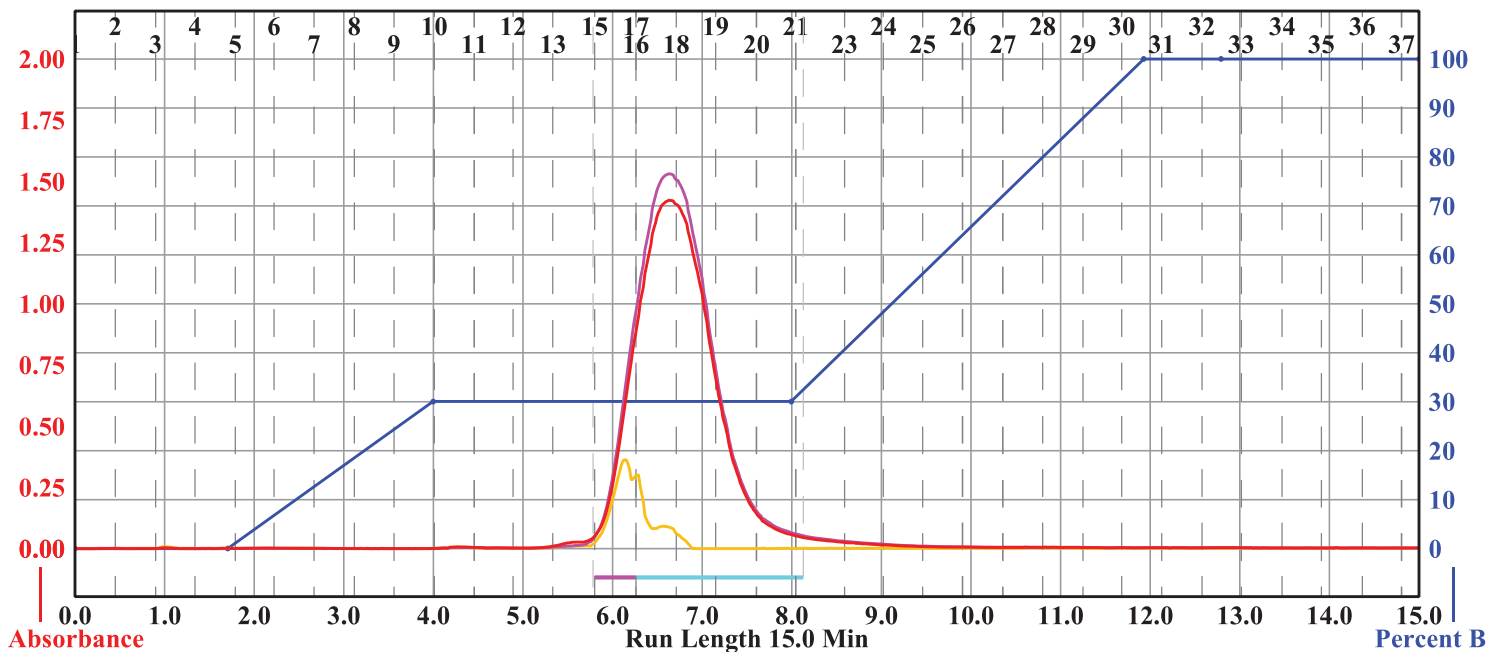

| Rack A |     |     |     |     |     | Peak #   | Start Tube | End Tube  |             |
|--------|-----|-----|-----|-----|-----|----------|------------|-----------|-------------|
| 108    | 107 | 106 | 105 | 104 | 103 | 1        | A:15       | A:16      |             |
| 97     | 98  | 99  | 100 | 101 | 102 | 2        | A:17       | A:21      |             |
| 96     | 95  | 94  | 93  | 92  | 91  |          |            |           |             |
| 85     | 86  | 87  | 88  | 89  | 90  |          |            |           |             |
| 84     | 83  | 82  | 81  | 80  | 79  |          |            |           |             |
| 73     | 74  | 75  | 76  | 77  | 78  |          |            |           |             |
| 72     | 71  | 70  | 69  | 68  | 67  |          |            |           |             |
| 61     | 62  | 63  | 64  | 65  | 66  |          |            |           |             |
| 60     | 59  | 58  | 57  | 56  | 55  |          |            |           |             |
| 49     | 50  | 51  | 52  | 53  | 54  |          |            |           |             |
| 48     | 47  | 46  | 45  | 44  | 43  |          |            |           |             |
| 37     | 38  | 39  | 40  | 41  | 42  |          |            |           |             |
| 36     | 35  | 34  | 33  | 32  | 31  |          |            |           |             |
| 25     | 26  | 27  | 28  | 29  | 30  |          |            |           |             |
| 24     | 23  | 22  | 21  | 20  | 19  |          |            |           |             |
| 13     | 14  | 15  | 16  | 17  | 18  |          |            |           |             |
| 12     | 11  | 10  | 9   | 8   | 7   |          |            |           |             |
| 1      | 2   | 3   | 4   | 5   | 6   |          |            |           |             |
|        |     |     |     |     |     | Duration | %B         | Solvent A | Solvent B   |
|        |     |     |     |     |     | 0.0      | 0.0        | A1 hexane | B2 methanol |
|        |     |     |     |     |     | 1.7      | 0.0        | A1 hexane | B2 methanol |
|        |     |     |     |     |     | 2.3      | 30.0       | A1 hexane | B2 methanol |
|        |     |     |     |     |     | 4.0      | 30.0       | A1 hexane | B2 methanol |
|        |     |     |     |     |     | 3.9      | 100.0      | A1 hexane | B2 methanol |
|        |     |     |     |     |     | 0.9      | 100.0      | A1 hexane | B2 methanol |
|        |     |     |     |     |     | 2.2      | 100.0      | A1 hexane | B2 methanol |

13 mm x 100 mm Tubes

Sample: moi-a-85-2

Peak Tube Volume: Max.

All Wavelength (orange): 200nm - 360nm

4x Column: 2

Non-Peak Tube Volume: Max.

Peak Width: 30 sec

RediSep Column: Silica 4g

Loading Type: Solid

Threshold: 0.20 AU

Flow Rate: 18 ml/min

Wavelength 1 (red): 254nm

Peak Width: 30 sec

Equilibration Volume: 33.6 ml

Threshold: 0.20 AU

Initial Waste: 0.0 ml

Wavelength 2 (purple): 280nm

Air Purge: 5.0 min

Solvent: A1 hexane

Solvent: B2 methanol

Run Notes:

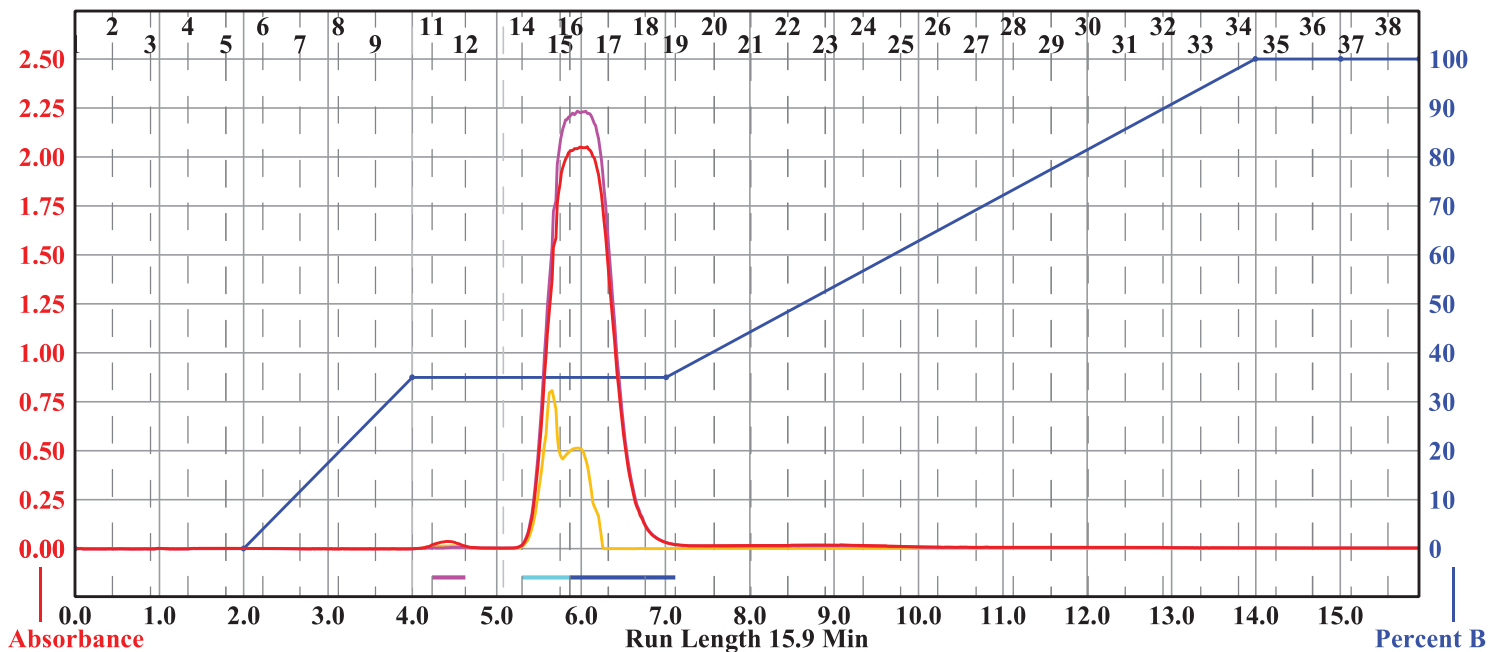

| Rack A |     |     |     |     |     | Peak #      | Start Tube           | End Tube             |
|--------|-----|-----|-----|-----|-----|-------------|----------------------|----------------------|
| 108    | 107 | 106 | 105 | 104 | 103 | 1<br>2<br>3 | A:11<br>A:14<br>A:16 | A:11<br>A:15<br>A:18 |
| 97     | 98  | 99  | 100 | 101 | 102 |             |                      |                      |
| 96     | 95  | 94  | 93  | 92  | 91  |             |                      |                      |
| 85     | 86  | 87  | 88  | 89  | 90  |             |                      |                      |
| 84     | 83  | 82  | 81  | 80  | 79  |             |                      |                      |
| 73     | 74  | 75  | 76  | 77  | 78  |             |                      |                      |
| 72     | 71  | 70  | 69  | 68  | 67  |             |                      |                      |
| 61     | 62  | 63  | 64  | 65  | 66  |             |                      |                      |
| 60     | 59  | 58  | 57  | 56  | 55  |             |                      |                      |
| 49     | 50  | 51  | 52  | 53  | 54  |             |                      |                      |
| 48     | 47  | 46  | 45  | 44  | 43  |             |                      |                      |
| 37     | 38  | 39  | 40  | 41  | 42  |             |                      |                      |
| 36     | 35  | 34  | 33  | 32  | 31  |             |                      |                      |
| 25     | 26  | 27  | 28  | 29  | 30  |             |                      |                      |
| 24     | 23  | 22  | 21  | 20  | 19  |             |                      |                      |
| 13     | 14  | 15  | 16  | 17  | 18  |             |                      |                      |
| 12     | 11  | 10  | 9   | 8   | 7   |             |                      |                      |
| 1      | 2   | 3   | 4   | 5   | 6   |             |                      |                      |

  

| Duration | %B    | Solvent A | Solvent B   |
|----------|-------|-----------|-------------|
| 0.0      | 0.0   | A1 hexane | B2 methanol |
| 2.0      | 0.0   | A1 hexane | B2 methanol |
| 2.0      | 35.0  | A1 hexane | B2 methanol |
| 3.0      | 35.0  | A1 hexane | B2 methanol |
| 7.0      | 100.0 | A1 hexane | B2 methanol |
| 1.0      | 100.0 | A1 hexane | B2 methanol |
| 0.9      | 100.0 | A1 hexane | B2 methanol |

13 mm x 100 mm Tubes



Sample: moi-a-137

Peak Tube Volume: Max.

All Wavelength (orange): 200nm - 360nm

4x Column: 1

Non-Peak Tube Volume: Max.

Peak Width: 30 sec

RediSep Column: Silica 4g

Loading Type: Solid

Threshold: 0.20 AU

Flow Rate: 18 ml/min

Wavelength 1 (red): 254nm

Peak Width: 30 sec

Equilibration Volume: 33.6 ml

Threshold: 0.20 AU

Initial Waste: 0.0 ml

Wavelength 2 (purple): 280nm

Air Purge: 5.0 min

Solvent: A1 hexane

Solvent: B2 methanol

Run Notes:

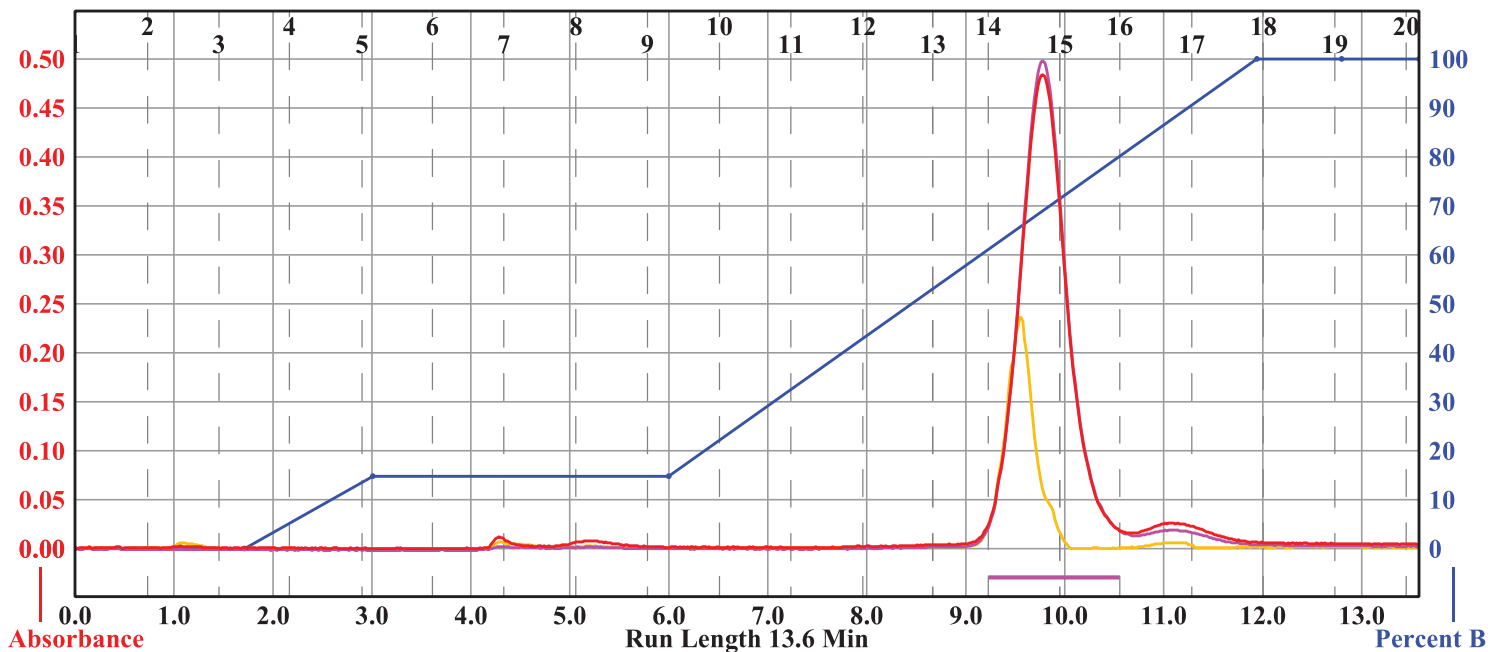

| Rack A |      |      |      |      | Peak #   | Start Tube | End Tube  |             |
|--------|------|------|------|------|----------|------------|-----------|-------------|
| (71)   | (72) | (73) | (74) | (75) | 1        | A:14       | A:15      |             |
| (70)   | (69) | (68) | (67) | (66) |          |            |           |             |
| (61)   | (62) | (63) | (64) | (65) |          |            |           |             |
| (60)   | (59) | (58) | (57) | (56) |          |            |           |             |
| (51)   | (52) | (53) | (54) | (55) |          |            |           |             |
| (50)   | (49) | (48) | (47) | (46) |          |            |           |             |
| (41)   | (42) | (43) | (44) | (45) |          |            |           |             |
| (40)   | (39) | (38) | (37) | (36) |          |            |           |             |
| (31)   | (32) | (33) | (34) | (35) |          |            |           |             |
| (30)   | (29) | (28) | (27) | (26) |          |            |           |             |
| (21)   | (22) | (23) | (24) | (25) |          |            |           |             |
| (20)   | (19) | (18) | (17) | (16) |          |            |           |             |
| (11)   | (12) | (13) | (14) | (15) |          |            |           |             |
| (10)   | (9)  | (8)  | (7)  | (6)  |          |            |           |             |
| (1)    | (2)  | (3)  | (4)  | (5)  |          |            |           |             |
|        |      |      |      |      | Duration | %B         | Solvent A | Solvent B   |
|        |      |      |      |      | 0.0      | 0.0        | A1 hexane | B2 methanol |
|        |      |      |      |      | 1.7      | 0.0        | A1 hexane | B2 methanol |
|        |      |      |      |      | 1.3      | 14.8       | A1 hexane | B2 methanol |
|        |      |      |      |      | 3.0      | 14.8       | A1 hexane | B2 methanol |
|        |      |      |      |      | 5.9      | 100.0      | A1 hexane | B2 methanol |
|        |      |      |      |      | 0.9      | 100.0      | A1 hexane | B2 methanol |
|        |      |      |      |      | 0.8      | 100.0      | A1 hexane | B2 methanol |

16 mm x 100 mm Tubes

Sample: moi-a-67

Peak Tube Volume: Max.

All Wavelength (orange): 200nm - 360nm

4x Column: 2

Non-Peak Tube Volume: Max.

Peak Width: 30 sec

RediSep Column: Silica 4g

Loading Type: Solid

Threshold: 0.20 AU

Flow Rate: 18 ml/min

Wavelength 1 (red): 254nm

Peak Width: 30 sec

Equilibration Volume: 33.6 ml

Threshold: 0.20 AU

Initial Waste: 0.0 ml

Wavelength 2 (purple): 280nm

Air Purge: 10.0 min

Solvent: A1 hexane

Solvent: B2 methanol

Run Notes:

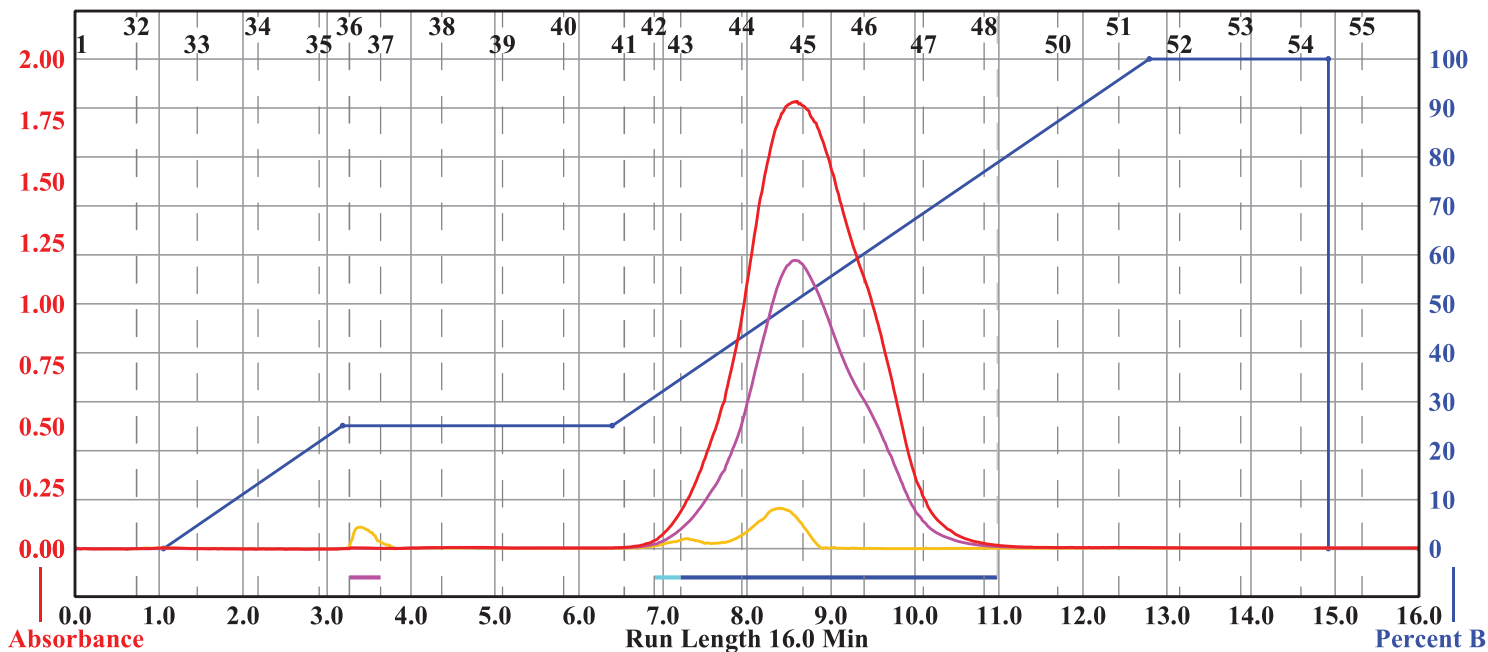

| Rack A |      |      |      |      | Peak #   | Start Tube | End Tube  |             |
|--------|------|------|------|------|----------|------------|-----------|-------------|
| (71)   | (72) | (73) | (74) | (75) | 1        | A:36       | A:36      |             |
| (70)   | (69) | (68) | (67) | (66) | 2        | A:42       | A:42      |             |
| (61)   | (62) | (63) | (64) | (65) | 3        | A:43       | A:48      |             |
| (60)   | (59) | (58) | (57) | (56) |          |            |           |             |
| (51)   | (52) | (53) | (54) | (55) |          |            |           |             |
| (50)   | (49) | (48) | (47) | (46) |          |            |           |             |
| (41)   | (42) | (43) | (44) | (45) |          |            |           |             |
| (40)   | (39) | (38) | (37) | (36) |          |            |           |             |
| (31)   | (32) | (33) | (34) | (35) | Duration | %B         | Solvent A | Solvent B   |
| (30)   | (29) | (28) | (27) | (26) | 0.0      | 0.0        | A1 hexane | B2 methanol |
| (21)   | (22) | (23) | (24) | (25) | 1.1      | 0.0        | A1 hexane | B2 methanol |
| (20)   | (19) | (18) | (17) | (16) | 2.1      | 25.1       | A1 hexane | B2 methanol |
| (11)   | (12) | (13) | (14) | (15) | 3.2      | 25.1       | A1 hexane | B2 methanol |
| (10)   | (9)  | (8)  | (7)  | (6)  | 6.4      | 100.0      | A1 hexane | B2 methanol |
| (1)    | (2)  | (3)  | (4)  | (5)  | 2.1      | 100.0      | A1 hexane | B2 methanol |
|        |      |      |      |      | 0.0      | 0.0        | A1 hexane | B2 methanol |
|        |      |      |      |      | 1.1      | 0.0        | A1 hexane | B2 methanol |

16 mm x 100 mm Tubes

Sample: moi-a-127

Peak Tube Volume: Max.

All Wavelength (orange): 200nm - 360nm

4x Column: 1

Non-Peak Tube Volume: Max.

Peak Width: 30 sec

RediSep Column: Silica 4g

Loading Type: Solid

Threshold: 0.20 AU

Flow Rate: 18 ml/min

Wavelength 1 (red): 254nm

Peak Width: 30 sec

Equilibration Volume: 33.6 ml

Threshold: 0.20 AU

Initial Waste: 0.0 ml

Wavelength 2 (purple): 280nm

Air Purge: 5.0 min

Solvent: A1 hexane

Solvent: B2 methanol

Run Notes:

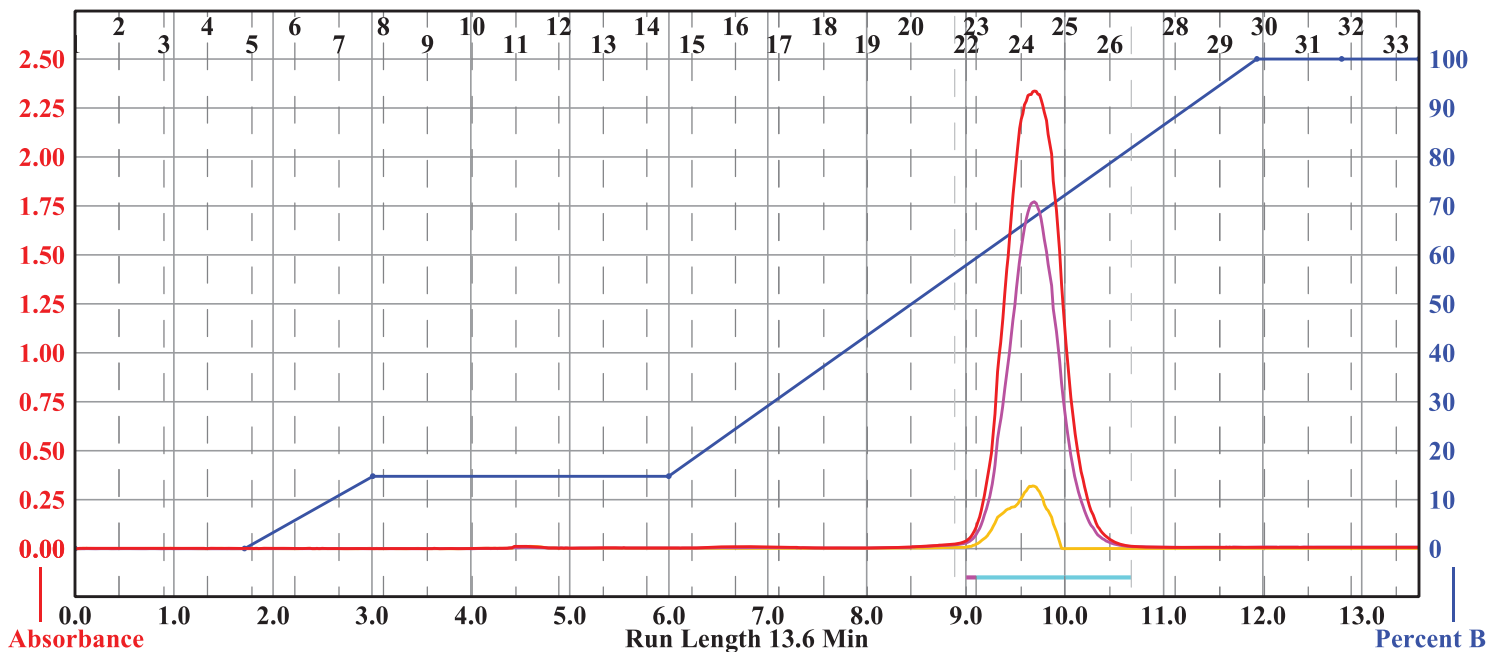

| Rack A |     |     |     |     |     | Peak # | Start Tube | End Tube |
|--------|-----|-----|-----|-----|-----|--------|------------|----------|
|        | 108 | 107 | 106 | 105 | 104 | 1      | A:22       | A:22     |
|        | 97  | 98  | 99  | 100 | 101 | 2      | A:23       | A:26     |
|        | 96  | 95  | 94  | 93  | 92  |        |            |          |
|        | 85  | 86  | 87  | 88  | 89  |        |            |          |
|        | 84  | 83  | 82  | 81  | 80  |        |            |          |
|        | 73  | 74  | 75  | 76  | 77  |        |            |          |
|        | 72  | 71  | 70  | 69  | 68  |        |            |          |
|        | 61  | 62  | 63  | 64  | 65  |        |            |          |
|        | 60  | 59  | 58  | 57  | 56  |        |            |          |
|        | 49  | 50  | 51  | 52  | 53  |        |            |          |
|        | 48  | 47  | 46  | 45  | 44  |        |            |          |
|        | 37  | 38  | 39  | 40  | 41  |        |            |          |
|        | 36  | 35  | 34  | 33  | 32  |        |            |          |
|        | 25  | 26  | 27  | 28  | 29  |        |            |          |
|        | 24  | 23  | 22  | 21  | 20  |        |            |          |
|        | 13  | 14  | 15  | 16  | 17  |        |            |          |
|        | 12  | 11  | 10  | 9   | 8   |        |            |          |
|        | 1   | 2   | 3   | 4   | 5   |        |            |          |

  

| Duration | %B    | Solvent A | Solvent B   |
|----------|-------|-----------|-------------|
| 0.0      | 0.0   | A1 hexane | B2 methanol |
| 1.7      | 0.0   | A1 hexane | B2 methanol |
| 1.3      | 14.8  | A1 hexane | B2 methanol |
| 3.0      | 14.8  | A1 hexane | B2 methanol |
| 5.9      | 100.0 | A1 hexane | B2 methanol |
| 0.9      | 100.0 | A1 hexane | B2 methanol |
| 0.8      | 100.0 | A1 hexane | B2 methanol |

13 mm x 100 mm Tubes

Sample: moi-a-87

Peak Tube Volume: Max.

All Wavelength (orange): 200nm - 360nm

4x Column: 2

Non-Peak Tube Volume: Max.

Peak Width: 30 sec

RediSep Column: Silica 4g

Loading Type: Solid

Threshold: 0.20 AU

Flow Rate: 18 ml/min

Wavelength 1 (red): 254nm

Peak Width: 30 sec

Equilibration Volume: 33.6 ml

Threshold: 0.20 AU

Initial Waste: 0.0 ml

Wavelength 2 (purple): 280nm

Air Purge: 5.0 min

Solvent: A1 hexane

Solvent: B2 methanol

Run Notes:

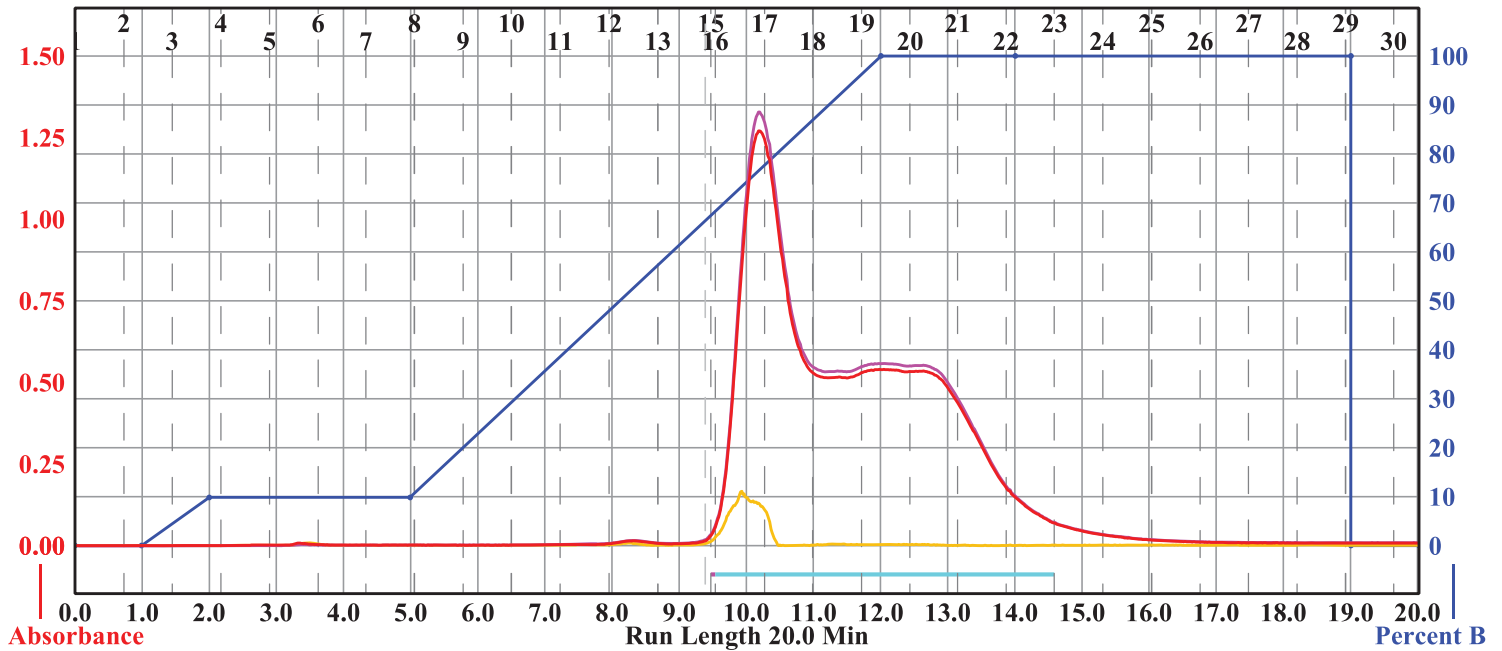

| Rack A |    |    |    |    |
|--------|----|----|----|----|
| 71     | 72 | 73 | 74 | 75 |
| 70     | 69 | 68 | 67 | 66 |
| 61     | 62 | 63 | 64 | 65 |
| 60     | 59 | 58 | 57 | 56 |
| 51     | 52 | 53 | 54 | 55 |
| 50     | 49 | 48 | 47 | 46 |
| 41     | 42 | 43 | 44 | 45 |
| 40     | 39 | 38 | 37 | 36 |
| 31     | 32 | 33 | 34 | 35 |
| 30     | 29 | 28 | 27 | 26 |
| 21     | 22 | 23 | 24 | 25 |
| 20     | 19 | 18 | 17 | 16 |
| 11     | 12 | 13 | 14 | 15 |
| 10     | 9  | 8  | 7  | 6  |
| 1      | 2  | 3  | 4  | 5  |

| Peak # | Start Tube | End Tube |
|--------|------------|----------|
| 1      | A:15       | A:15     |
| 2      | A:16       | A:22     |

| Duration | %B    | Solvent A | Solvent B   |
|----------|-------|-----------|-------------|
| 0.0      | 0.0   | A1 hexane | B2 methanol |
| 1.0      | 0.0   | A1 hexane | B2 methanol |
| 1.0      | 9.9   | A1 hexane | B2 methanol |
| 3.0      | 9.9   | A1 hexane | B2 methanol |
| 7.0      | 100.0 | A1 hexane | B2 methanol |
| 2.0      | 100.0 | A1 hexane | B2 methanol |
| 5.0      | 100.0 | A1 hexane | B2 methanol |
| 0.0      | 0.0   | A1 hexane | B2 methanol |
| 1.0      | 0.0   | A1 hexane | B2 methanol |

16 mm x 100 mm Tubes

Sample: moi-a-91

Peak Tube Volume: Max.

All Wavelength (orange): 200nm - 360nm

4x Column: 1

Non-Peak Tube Volume: Max.

Peak Width: 30 sec

RediSep Column: Silica 4g

Loading Type: Solid

Threshold: 0.20 AU

Flow Rate: 18 ml/min

Wavelength 1 (red): 254nm

Peak Width: 30 sec

Equilibration Volume: 33.6 ml

Threshold: 0.20 AU

Initial Waste: 0.0 ml

Wavelength 2 (purple): 280nm

Air Purge: 5.1 min

Solvent: A1 hexane

Solvent: B2 methanol

Run Notes:

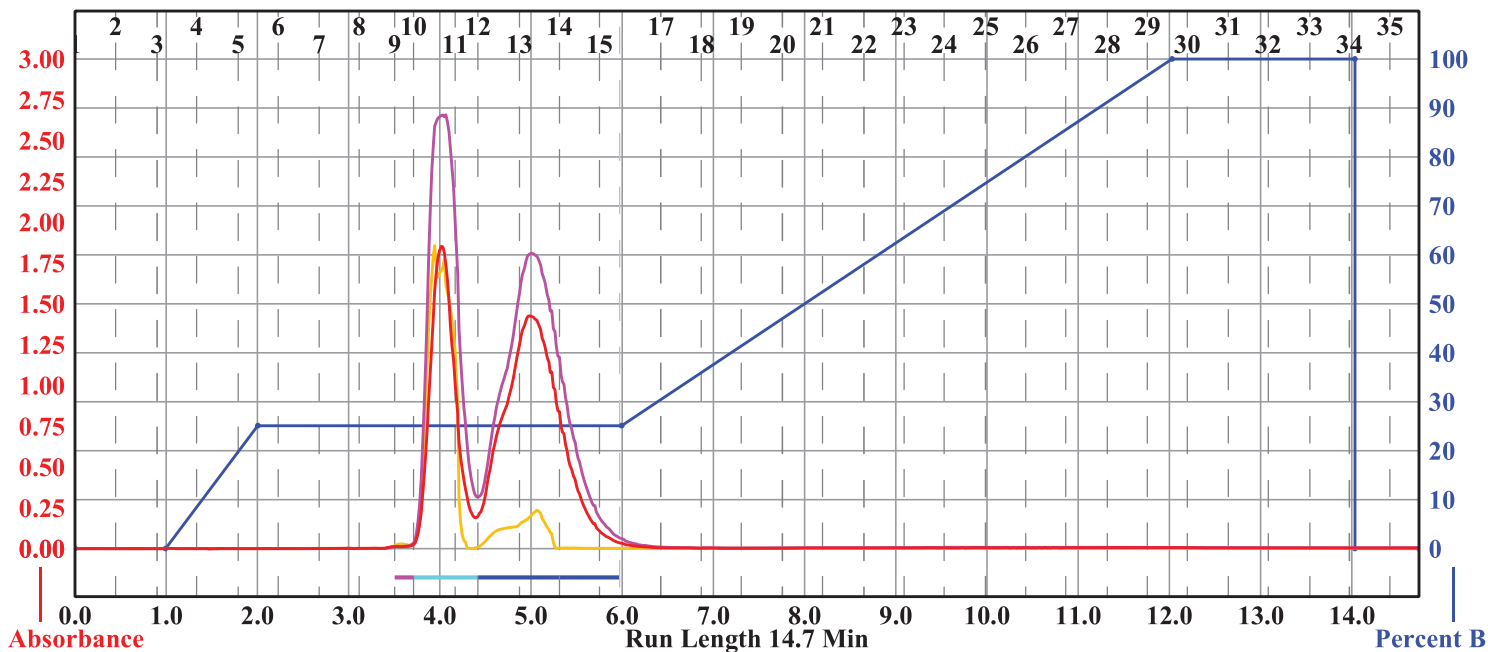

| Rack A |     |     |     |     |     |
|--------|-----|-----|-----|-----|-----|
| 108    | 107 | 106 | 105 | 104 | 103 |
| 97     | 98  | 99  | 100 | 101 | 102 |
| 96     | 95  | 94  | 93  | 92  | 91  |
| 85     | 86  | 87  | 88  | 89  | 90  |
| 84     | 83  | 82  | 81  | 80  | 79  |
| 73     | 74  | 75  | 76  | 77  | 78  |
| 72     | 71  | 70  | 69  | 68  | 67  |
| 61     | 62  | 63  | 64  | 65  | 66  |
| 60     | 59  | 58  | 57  | 56  | 55  |
| 49     | 50  | 51  | 52  | 53  | 54  |
| 48     | 47  | 46  | 45  | 44  | 43  |
| 37     | 38  | 39  | 40  | 41  | 42  |
| 36     | 35  | 34  | 33  | 32  | 31  |
| 25     | 26  | 27  | 28  | 29  | 30  |
| 24     | 23  | 22  | 21  | 20  | 19  |
| 13     | 14  | 15  | 16  | 17  | 18  |
| 12     | 11  | 10  | 9   | 8   | 7   |
| 1      | 2   | 3   | 4   | 5   | 6   |

| Peak # | Start Tube | End Tube |
|--------|------------|----------|
| 1      | A:9        | A:9      |
| 2      | A:10       | A:11     |
| 3      | A:12       | A:15     |

| Duration | %B    | Solvent A | Solvent B   |
|----------|-------|-----------|-------------|
| 0.0      | 0.0   | A1 hexane | B2 methanol |
| 1.0      | 0.0   | A1 hexane | B2 methanol |
| 1.0      | 25.1  | A1 hexane | B2 methanol |
| 4.0      | 25.1  | A1 hexane | B2 methanol |
| 6.0      | 100.0 | A1 hexane | B2 methanol |
| 2.0      | 100.0 | A1 hexane | B2 methanol |
| 0.0      | 0.0   | A1 hexane | B2 methanol |
| 0.7      | 0.0   | A1 hexane | B2 methanol |

13 mm x 100 mm Tubes

Sample: moi-a-129

Peak Tube Volume: 8 ml

All Wavelength (orange): 200nm - 360nm

4x Column: 2

Non-Peak Tube Volume: Max.

Peak Width: 30 sec

RediSep Column: Silica 4g

Loading Type: Solid

Threshold: 0.20 AU

Flow Rate: 18 ml/min

Wavelength 1 (red): 254nm

Peak Width: 30 sec

Equilibration Volume: 33.6 ml

Threshold: 0.20 AU

Initial Waste: 0.0 ml

Wavelength 2 (purple): 280nm

Air Purge: 5.0 min

Solvent: A1 hexane

Solvent: B2 methanol

Run Notes:

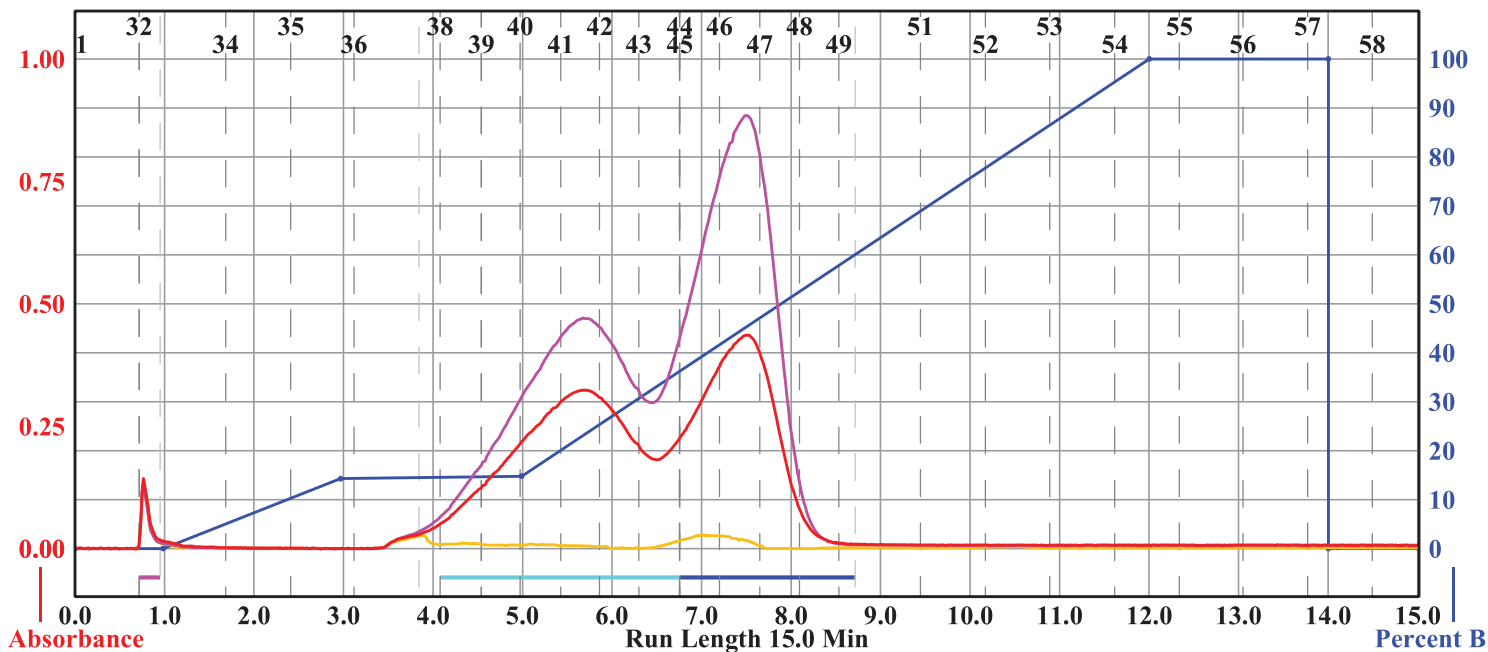

| Rack A |      |      |      |      | Peak # | Start Tube | End Tube |
|--------|------|------|------|------|--------|------------|----------|
| (71)   | (72) | (73) | (74) | (75) | 1      | A:32       | A:32     |
| (70)   | (69) | (68) | (67) | (66) | 2      | A:38       | A:44     |
| (61)   | (62) | (63) | (64) | (65) | 3      | A:45       | A:49     |
| (60)   | (59) | (58) | (57) | (56) |        |            |          |
| (51)   | (52) | (53) | (54) | (55) |        |            |          |
| (50)   | (49) | (48) | (47) | (46) |        |            |          |
| (41)   | (42) | (43) | (44) | (45) |        |            |          |
| (40)   | (39) | (38) | (37) | (36) |        |            |          |
| (31)   | (32) | (33) | (34) | (35) |        |            |          |
| (30)   | (29) | (28) | (27) | (26) |        |            |          |
| (21)   | (22) | (23) | (24) | (25) |        |            |          |
| (20)   | (19) | (18) | (17) | (16) |        |            |          |
| (11)   | (12) | (13) | (14) | (15) |        |            |          |
| (10)   | (9)  | (8)  | (7)  | (6)  |        |            |          |
| (1)    | (2)  | (3)  | (4)  | (5)  |        |            |          |

  

| Duration | %B    | Solvent A | Solvent B   |
|----------|-------|-----------|-------------|
| 0.0      | 0.0   | A1 hexane | B2 methanol |
| 1.0      | 0.0   | A1 hexane | B2 methanol |
| 2.0      | 14.3  | A1 hexane | B2 methanol |
| 2.0      | 14.8  | A1 hexane | B2 methanol |
| 7.0      | 100.0 | A1 hexane | B2 methanol |
| 2.0      | 100.0 | A1 hexane | B2 methanol |
| 0.0      | 0.0   | A1 hexane | B2 methanol |
| 1.0      | 0.0   | A1 hexane | B2 methanol |

16 mm x 100 mm Tubes
